# Supplementary material for: De novo transcriptome in roots of switchgrass (Panicum virgatum L.) reveals gene expression dynamic and act network under alkaline salt stress
Source: BMC Genomics. 2021 Jan 28;22:82. doi: 10.1186/s12864-021-07368-w (PMC7841905; doi:10.1186/s12864-021-07368-w)
Supplement: Supplementary file 13 — Additional file 13: Table S12. Summary of the 1480 TFs in response to alkaline salt stress. [file 12864_2021_7368_MOESM13_ESM.xlsx]

## Sheet: Sheet1
#ID	Family	Type	S0	S6	S24	T0	T6	T24	FDR-S0/S6	Log2FC-S0/S6	S0/S6	FDR-S0/S24	Log2FC-S0/S24	S0/S24	FDR-T0/T24	Log2FC-T0/T24	T0/T6	FDR-T0/T24	Log2FC-T0/T24	T0/T24	COG_class	COG_class_annotation	GO_annotation	KEGG_annotation	KOG_class	KOG_class_annotation	Pfam_annotation	Swissprot_annotation	eggNOG_class	eggNOG_class_annotation	nr_annotation	GO_second_level_annotation	KEGG_pathway_annotation
BMK_Unigene_011653	Alfin-like	TF	21.1672	17.4617	17.2307	20.5399	18.0275	18.7347	0.942294	0.0526642	normal	0.650012	0.316142	normal	0.854612	0.1657	normal	0.757348	0.184925	normal	--	--	Molecular Function: DNA binding (GO:0003677);; Cellular Component: nucleus (GO:0005634);; Biological Process: regulation of transcription, DNA-templated (GO:0006355);; Molecular Function: zinc ion binding (GO:0008270);; Biological Process: chromatin modification (GO:0016568);; Molecular Function: methylated histone binding (GO:0035064);;	--	[R]	General function prediction only	Domain of unknown function (DUF3594);; PHD-finger	PHD finger protein ALFIN-LIKE 5 OS=Oryza sativa subsp. japonica (Rice) PE=2 SV=1	K	Transcription	hypothetical protein SORBIDRAFT_09g020610 [Sorghum bicolor]	molecular function: binding (GO:0005488);; cellular component: cell (GO:0005623);; cellular component: organelle (GO:0043226);; cellular component: cell part (GO:0044464);; biological process: biological regulation (GO:0065007);; biological process: cellular process (GO:0009987);; biological process: cellular component organization or biogenesis (GO:0071840)	--
BMK_Unigene_033636	Alfin-like	TF	12.099	13.8236	9.317	8.69469	12.6101	11.1689	0.513227	0.634977	normal	0.945943	-0.0959095	normal	0.214069	1.12543	normal	0.151979	0.996412	normal	--	--	Cellular Component: nucleus (GO:0005634);; Biological Process: regulation of transcription, DNA-templated (GO:0006355);; Molecular Function: zinc ion binding (GO:0008270);; Biological Process: chromatin modification (GO:0016568);; Molecular Function: methylated histone binding (GO:0035064);;	--	[R]	General function prediction only	Domain of unknown function (DUF3594);; PHD-finger	PHD finger protein ALFIN-LIKE 2 OS=Oryza sativa subsp. japonica (Rice) PE=2 SV=1	K	Transcription	PREDICTED: PHD finger protein ALFIN-LIKE 3-like isoform X3 [Setaria italica]	cellular component: cell (GO:0005623);; cellular component: organelle (GO:0043226);; cellular component: cell part (GO:0044464);; biological process: biological regulation (GO:0065007);; molecular function: binding (GO:0005488);; biological process: cellular process (GO:0009987);; biological process: cellular component organization or biogenesis (GO:0071840)	--
BMK_Unigene_042266	Alfin-like	TF	44.9361	29.8383	30.6712	42.8724	31.5436	28.0519	0.819468	0.135392	normal	0.650012	0.307402	normal	0.751897	0.273399	normal	0.909553	0.0747547	normal	--	--	Cellular Component: nucleus (GO:0005634);; Biological Process: regulation of transcription, DNA-templated (GO:0006355);; Molecular Function: zinc ion binding (GO:0008270);; Biological Process: chromatin modification (GO:0016568);; Molecular Function: methylated histone binding (GO:0035064);;	--	[R]	General function prediction only	Domain of unknown function (DUF3594);; PHD-finger	PHD finger protein ALFIN-LIKE 8 OS=Oryza sativa subsp. japonica (Rice) PE=2 SV=1	K	Transcription	PREDICTED: PHD finger protein ALFIN-LIKE 8-like [Setaria italica]	cellular component: cell (GO:0005623);; cellular component: organelle (GO:0043226);; cellular component: cell part (GO:0044464);; biological process: biological regulation (GO:0065007);; molecular function: binding (GO:0005488);; biological process: cellular process (GO:0009987);; biological process: cellular component organization or biogenesis (GO:0071840)	--
BMK_Unigene_049217	Alfin-like	TF	18.3462	8.10735	13.5006	12.9933	9.53733	12.122	0.185158	-0.796795	normal	0.959051	0.0516449	normal	0.91318	-0.149348	normal	0.699326	0.288233	normal	--	--	Molecular Function: DNA binding (GO:0003677);; Cellular Component: nucleus (GO:0005634);; Biological Process: regulation of transcription, DNA-templated (GO:0006355);; Molecular Function: zinc ion binding (GO:0008270);; Biological Process: chromatin modification (GO:0016568);; Molecular Function: methylated histone binding (GO:0035064);;	--	[R]	General function prediction only	Domain of unknown function (DUF3594);; PHD-finger	PHD finger protein ALFIN-LIKE 9 GN=OsI_26819 OS=Oryza sativa subsp. indica (Rice) PE=3 SV=1	K	Transcription	PREDICTED: PHD finger protein ALFIN-LIKE 9-like [Setaria italica]	molecular function: binding (GO:0005488);; cellular component: cell (GO:0005623);; cellular component: organelle (GO:0043226);; cellular component: cell part (GO:0044464);; biological process: biological regulation (GO:0065007);; biological process: cellular process (GO:0009987);; biological process: cellular component organization or biogenesis (GO:0071840)	--
BMK_Unigene_081205	Alfin-like	TF	104.543	46.1092	38.9455	139.505	52.1629	77.1306	0.123235	-0.758228	normal	0.179105	-0.85419	normal	0.026587	-1.10453	normal	0.33773	-0.474436	normal	--	--	Cellular Component: nucleus (GO:0005634);; Biological Process: regulation of transcription, DNA-templated (GO:0006355);; Molecular Function: zinc ion binding (GO:0008270);; Biological Process: chromatin modification (GO:0016568);; Molecular Function: methylated histone binding (GO:0035064);;	--	[R]	General function prediction only	Domain of unknown function (DUF3594);; PHD-finger	PHD finger protein ALFIN-LIKE 7 OS=Oryza sativa subsp. japonica (Rice) PE=2 SV=1	K	Transcription	hypothetical protein SORBIDRAFT_04g023220 [Sorghum bicolor]	cellular component: cell (GO:0005623);; cellular component: organelle (GO:0043226);; cellular component: cell part (GO:0044464);; biological process: biological regulation (GO:0065007);; molecular function: binding (GO:0005488);; biological process: cellular process (GO:0009987);; biological process: cellular component organization or biogenesis (GO:0071840)	--
BMK_Unigene_083114	Alfin-like	TF	3.46558	3.78483	2.8401	4.57955	5.32269	3.90039	0.595347	0.688844	normal	0.88637	0.236109	normal	0.751897	0.639781	normal	0.989237	-0.0127405	normal	--	--	Cellular Component: nucleus (GO:0005634);; Biological Process: regulation of transcription, DNA-templated (GO:0006355);; Molecular Function: zinc ion binding (GO:0008270);; Biological Process: chromatin modification (GO:0016568);; Molecular Function: methylated histone binding (GO:0035064);;	--	[R]	General function prediction only	PHD-finger;; Domain of unknown function (DUF3594)	PHD finger protein ALFIN-LIKE 2 OS=Oryza sativa subsp. japonica (Rice) PE=2 SV=1	K	Transcription	PREDICTED: PHD finger protein ALFIN-LIKE 3-like isoform X3 [Setaria italica]	cellular component: cell (GO:0005623);; cellular component: organelle (GO:0043226);; cellular component: cell part (GO:0044464);; biological process: biological regulation (GO:0065007);; molecular function: binding (GO:0005488);; biological process: cellular process (GO:0009987);; biological process: cellular component organization or biogenesis (GO:0071840)	--
BMK_Unigene_086237	Alfin-like	TF	6.27768	4.71834	4.16366	7.25286	4.87733	6.55193	0.643962	-0.333594	normal	0.911347	0.105788	normal	0.838074	-0.197717	normal	0.861564	0.146001	normal	--	--	Molecular Function: DNA binding (GO:0003677);; Cellular Component: nucleus (GO:0005634);; Biological Process: regulation of transcription, DNA-templated (GO:0006355);; Molecular Function: zinc ion binding (GO:0008270);; Biological Process: chromatin modification (GO:0016568);; Molecular Function: methylated histone binding (GO:0035064);;	--	[R]	General function prediction only	PHD-finger	PHD finger protein ALFIN-LIKE 6 OS=Oryza sativa subsp. japonica (Rice) PE=2 SV=1	K	Transcription	hypothetical protein SORBIDRAFT_09g020610 [Sorghum bicolor]	molecular function: binding (GO:0005488);; cellular component: cell (GO:0005623);; cellular component: organelle (GO:0043226);; cellular component: cell part (GO:0044464);; biological process: biological regulation (GO:0065007);; biological process: cellular process (GO:0009987);; biological process: cellular component organization or biogenesis (GO:0071840)	--
BMK_Unigene_087028	Alfin-like	TF	74.3747	45.7179	43.2259	57.5898	40.3685	40.0052	0.60326	-0.282886	normal	0.65547	-0.27038	normal	0.887934	-0.143394	normal	0.98748	-0.00973609	normal	--	--	Cellular Component: nucleus (GO:0005634);; Biological Process: regulation of transcription, DNA-templated (GO:0006355);; Molecular Function: zinc ion binding (GO:0008270);; Biological Process: chromatin modification (GO:0016568);; Molecular Function: methylated histone binding (GO:0035064);;	--	[R]	General function prediction only	Domain of unknown function (DUF3594);; PHD-finger	PHD finger protein ALFIN-LIKE 8 OS=Oryza sativa subsp. japonica (Rice) PE=2 SV=1	K	Transcription	PREDICTED: PHD finger protein ALFIN-LIKE 8-like [Setaria italica]	cellular component: cell (GO:0005623);; cellular component: organelle (GO:0043226);; cellular component: cell part (GO:0044464);; biological process: biological regulation (GO:0065007);; molecular function: binding (GO:0005488);; biological process: cellular process (GO:0009987);; biological process: cellular component organization or biogenesis (GO:0071840)	--
BMK_Unigene_092425	Alfin-like	TF	28.4046	17.4401	14.6133	26.938	21.3904	15.2087	0.247004	-0.623063	normal	0.193331	-0.769347	normal	0.966654	-0.0560663	normal	0.0941101	-0.728746	normal	--	--	Biological Process: regulation of transcription, DNA-templated (GO:0006355);; Molecular Function: zinc ion binding (GO:0008270);; Molecular Function: histone binding (GO:0042393);;	--	[R]	General function prediction only	Domain of unknown function (DUF3594);; PHD-finger;; Domain of unknown function (DUF3594)	PHD finger protein ALFIN-LIKE 1 OS=Oryza sativa subsp. japonica (Rice) PE=2 SV=1	--	--	hypothetical protein SORBIDRAFT_03g005320 [Sorghum bicolor]	biological process: biological regulation (GO:0065007);; molecular function: binding (GO:0005488)	--
BMK_Unigene_009706	AP2/ERF-AP2	TF	2.18918	2.29307	0.933415	7.19154	8.13186	7.86227	0.612164	0.496559	normal	0.650012	-0.609163	normal	0.908838	0.344769	normal	0.720296	0.481331	normal	--	--	Molecular Function: DNA binding (GO:0003677);; Molecular Function: sequence-specific DNA binding transcription factor activity (GO:0003700);; Cellular Component: nucleus (GO:0005634);; Biological Process: regulation of transcription, DNA-templated (GO:0006355);; Biological Process: photomorphogenesis (GO:0009640);; Biological Process: response to abscisic acid (GO:0009737);; Biological Process: e…	K09285|0|sita:101767014|AP2-like ethylene-responsive transcription factor AIL5-like; K09285 AP2-like factor, ANT lineage (A)	--	--	AP2 domain	AP2-like ethylene-responsive transcription factor AIL5 GN=AIL5 OS=Arabidopsis thaliana (Mouse-ear cress) PE=2 SV=2	K	Transcription	PREDICTED: AP2-like ethylene-responsive transcription factor AIL5-like [Setaria italica]	molecular function: binding (GO:0005488);; biological process: biological regulation (GO:0065007);; molecular function: nucleic acid binding transcription factor activity (GO:0001071);; cellular component: cell (GO:0005623);; cellular component: organelle (GO:0043226);; cellular component: cell part (GO:0044464);; biological process: multicellular organismal process (GO:0032501);; biological proc…	--
BMK_Unigene_041727	AP2/ERF-AP2	TF	18.3047	11.348	11.1868	14.9561	12.1467	14.6401	0.766486	-0.452311	normal	0.65547	-0.648373	normal	0.985584	0.0585959	normal	0.972123	0.0669376	normal	--	--	Molecular Function: DNA binding (GO:0003677);; Molecular Function: sequence-specific DNA binding transcription factor activity (GO:0003700);; Cellular Component: nucleus (GO:0005634);; Cellular Component: mitochondrion (GO:0005739);; Biological Process: regulation of transcription, DNA-templated (GO:0006355);;	K09285|3.03912e-135|sita:101783320|AP2-like ethylene-responsive transcription factor PLT2-like; K09285 AP2-like factor, ANT lineage (A)	--	--	AP2 domain	AP2-like ethylene-responsive transcription factor AIL1 GN=AIL1 OS=Arabidopsis thaliana (Mouse-ear cress) PE=2 SV=1	K	Transcription	putative AP2/EREBP transcription factor superfamily protein [Zea mays]	molecular function: binding (GO:0005488);; biological process: biological regulation (GO:0065007);; molecular function: nucleic acid binding transcription factor activity (GO:0001071);; cellular component: cell (GO:0005623);; cellular component: organelle (GO:0043226);; cellular component: cell part (GO:0044464)	--
BMK_Unigene_044459	AP2/ERF-AP2	TF	0.988729	0.0535234	0	0.809322	1.43877	0.324975	0.080583	-3.11793	normal	0.0192817	-4.59302	normal	0.751897	0.840663	normal	0.699326	-0.818769	normal	--	--	Molecular Function: DNA binding (GO:0003677);; Molecular Function: sequence-specific DNA binding transcription factor activity (GO:0003700);; Cellular Component: nucleus (GO:0005634);; Biological Process: regulation of transcription, DNA-templated (GO:0006355);; Biological Process: organ morphogenesis (GO:0009887);;	K09285|1.72519e-176|sbi:SORBI_04g025960|SORBIDRAFT_04g025960, Sb04g025960; hypothetical protein; K09285 AP2-like factor, ANT lineage (A)	--	--	AP2 domain	AP2-like ethylene-responsive transcription factor AIL5 GN=AIL5 OS=Arabidopsis thaliana (Mouse-ear cress) PE=2 SV=2	K	Transcription	hypothetical protein SORBIDRAFT_04g025960 [Sorghum bicolor]	molecular function: binding (GO:0005488);; biological process: biological regulation (GO:0065007);; molecular function: nucleic acid binding transcription factor activity (GO:0001071);; cellular component: cell (GO:0005623);; cellular component: organelle (GO:0043226);; cellular component: cell part (GO:0044464);; biological process: multicellular organismal process (GO:0032501);; biological proc…	--
BMK_Unigene_050641	AP2/ERF-AP2	TF	4.82566	0.163743	0.118406	1.87712	0.913668	0.314542	5.80292e-05	-4.00893	down	0.000148192	-4.2908	down	0.65834	-1.27827	normal	0.0157294	-2.27979	normal	--	--	Molecular Function: DNA binding (GO:0003677);; Molecular Function: sequence-specific DNA binding transcription factor activity (GO:0003700);; Cellular Component: nucleus (GO:0005634);; Biological Process: regulation of transcription, DNA-templated (GO:0006355);;	K09284|0|sita:101772000|floral homeotic protein APETALA 2-like; K09284 AP2-like factor, euAP2 lineage (A)	--	--	AP2 domain	Floral homeotic protein APETALA 2 GN=AP2 OS=Arabidopsis thaliana (Mouse-ear cress) PE=1 SV=1	--	--	PREDICTED: floral homeotic protein APETALA 2-like [Setaria italica]	molecular function: binding (GO:0005488);; biological process: biological regulation (GO:0065007);; molecular function: nucleic acid binding transcription factor activity (GO:0001071);; cellular component: cell (GO:0005623);; cellular component: organelle (GO:0043226);; cellular component: cell part (GO:0044464)	--
BMK_Unigene_085790	AP2/ERF-AP2	TF	19.7495	12.2421	12.386	15.8852	13.4597	16.3018	0.866672	-0.287308	normal	0.806637	0.411888	normal	0.626571	1.17102	normal	0.328351	1.33402	normal	--	--	Molecular Function: DNA binding (GO:0003677);; Molecular Function: sequence-specific DNA binding transcription factor activity (GO:0003700);; Cellular Component: nucleus (GO:0005634);; Cellular Component: mitochondrion (GO:0005739);; Biological Process: regulation of transcription, DNA-templated (GO:0006355);;	K09285|1.49117e-136|sita:101783320|AP2-like ethylene-responsive transcription factor PLT2-like; K09285 AP2-like factor, ANT lineage (A)	--	--	AP2 domain	AP2-like ethylene-responsive transcription factor AIL1 GN=AIL1 OS=Arabidopsis thaliana (Mouse-ear cress) PE=2 SV=1	--	--	putative AP2/EREBP transcription factor superfamily protein [Zea mays]	molecular function: binding (GO:0005488);; biological process: biological regulation (GO:0065007);; molecular function: nucleic acid binding transcription factor activity (GO:0001071);; cellular component: cell (GO:0005623);; cellular component: organelle (GO:0043226);; cellular component: cell part (GO:0044464)	--
BMK_Unigene_000338	AP2/ERF-ERF	TF	505.117	356.413	466.99	585.91	339.043	461.336	0.885338	-0.0959468	normal	0.693847	0.305825	normal	0.751897	-0.382525	normal	0.540486	0.443387	normal	--	--	Molecular Function: DNA binding (GO:0003677);; Molecular Function: sequence-specific DNA binding transcription factor activity (GO:0003700);; Cellular Component: nucleus (GO:0005634);; Biological Process: regulation of transcription, DNA-templated (GO:0006355);; Cellular Component: plastid (GO:0009536);;	K09286|6.39215e-119|sita:101781253|ethylene-responsive transcription factor RAP2-4-like; K09286 EREBP-like factor (A)	--	--	AP2 domain	Ethylene-responsive transcription factor RAP2-4 OS=Arabidopsis thaliana (Mouse-ear cress) PE=1 SV=1	K	Transcription	PREDICTED: ethylene-responsive transcription factor RAP2-4-like [Setaria italica]	molecular function: binding (GO:0005488);; biological process: biological regulation (GO:0065007);; molecular function: nucleic acid binding transcription factor activity (GO:0001071);; cellular component: cell (GO:0005623);; cellular component: organelle (GO:0043226);; cellular component: cell part (GO:0044464)	--
BMK_Unigene_002415	AP2/ERF-ERF	TF	34.3797	29.1132	16.4128	22.529	27.8826	14.1476	0.848155	0.134648	normal	0.504414	-0.544872	normal	0.71509	0.562456	normal	0.699326	-0.299134	normal	--	--	Molecular Function: DNA binding (GO:0003677);; Molecular Function: sequence-specific DNA binding transcription factor activity (GO:0003700);; Cellular Component: nucleus (GO:0005634);; Biological Process: regulation of transcription, DNA-templated (GO:0006355);;	--	--	--	AP2 domain	Dehydration-responsive element-binding protein 2B OS=Oryza sativa subsp. japonica (Rice) PE=2 SV=2	K	Transcription	PREDICTED: dehydration-responsive element-binding protein 2B-like isoform X2 [Setaria italica]	molecular function: binding (GO:0005488);; biological process: biological regulation (GO:0065007);; molecular function: nucleic acid binding transcription factor activity (GO:0001071);; cellular component: cell (GO:0005623);; cellular component: organelle (GO:0043226);; cellular component: cell part (GO:0044464)	--
BMK_Unigene_004919	AP2/ERF-ERF	TF	11.1468	13.9738	9.93948	9.8314	11.6562	8.61086	0.0250816	1.87195	normal	0.0170602	2.1494	normal	0.535547	1.15582	normal	0.384928	1.09241	normal	--	--	Molecular Function: DNA binding (GO:0003677);; Molecular Function: sequence-specific DNA binding transcription factor activity (GO:0003700);; Cellular Component: nucleus (GO:0005634);; Biological Process: response to salt stress (GO:0009651);; Biological Process: positive regulation of transcription, DNA-templated (GO:0045893);;	--	--	--	AP2 domain	Dehydration-responsive element-binding protein 2A GN=DREB2A OS=Oryza sativa subsp. indica (Rice) PE=3 SV=2	--	--	PREDICTED: dehydration-responsive element-binding protein 2A-like [Setaria italica]	molecular function: binding (GO:0005488);; biological process: biological regulation (GO:0065007);; molecular function: nucleic acid binding transcription factor activity (GO:0001071);; cellular component: cell (GO:0005623);; cellular component: organelle (GO:0043226);; cellular component: cell part (GO:0044464);; biological process: response to stimulus (GO:0050896)	--
BMK_Unigene_005396	AP2/ERF-ERF	TF	224.342	171.494	113.927	144.412	67.7772	73.6103	0.974122	0.0207399	normal	0.547891	-0.496252	normal	0.241796	-0.768811	normal	0.199363	-0.532373	normal	--	--	Molecular Function: sequence-specific DNA binding transcription factor activity (GO:0003700);; Cellular Component: nucleus (GO:0005634);; Biological Process: regulation of transcription, DNA-templated (GO:0006355);; Biological Process: response to fungus (GO:0009620);;	K09286|2.22391e-162|sita:101785711|ethylene-responsive transcription factor 1-like; K09286 EREBP-like factor (A)	--	--	AP2 domain	Ethylene-responsive transcription factor 1 GN=OJ1311_D08.9 OS=Oryza sativa subsp. japonica (Rice) PE=1 SV=1	K	Transcription	PREDICTED: ethylene-responsive transcription factor 1-like [Setaria italica]	biological process: biological regulation (GO:0065007);; molecular function: nucleic acid binding transcription factor activity (GO:0001071);; cellular component: cell (GO:0005623);; cellular component: organelle (GO:0043226);; cellular component: cell part (GO:0044464);; biological process: response to stimulus (GO:0050896);; biological process: multi-organism process (GO:0051704)	--
BMK_Unigene_005973	AP2/ERF-ERF	TF	3.99263	4.12804	2.53955	2.61784	1.55452	1.4334	0.623729	0.383818	normal	0.895237	-0.181953	normal	0.751897	-0.507533	normal	0.699326	-0.495485	normal	--	--	Molecular Function: DNA binding (GO:0003677);; Molecular Function: sequence-specific DNA binding transcription factor activity (GO:0003700);; Molecular Function: protein binding (GO:0005515);; Cellular Component: nucleus (GO:0005634);; Biological Process: regulation of transcription, DNA-templated (GO:0006355);; Cellular Component: plastid (GO:0009536);; Molecular Function: ion binding (GO:004316…	--	--	--	AP2 domain	Ethylene-responsive transcription factor ERF034 OS=Arabidopsis thaliana (Mouse-ear cress) PE=2 SV=2	--	--	PREDICTED: ethylene-responsive transcription factor ERF034-like [Setaria italica]	molecular function: binding (GO:0005488);; biological process: biological regulation (GO:0065007);; molecular function: nucleic acid binding transcription factor activity (GO:0001071);; cellular component: cell (GO:0005623);; cellular component: organelle (GO:0043226);; cellular component: cell part (GO:0044464)	--
BMK_Unigene_007311	AP2/ERF-ERF	TF	41.4061	25.0708	25.3868	32.0767	27.2611	27.8593	0.557327	-0.34549	normal	0.784053	-0.190693	normal	0.984023	0.037636	normal	0.729985	0.177034	normal	--	--	Molecular Function: DNA binding (GO:0003677);; Molecular Function: sequence-specific DNA binding transcription factor activity (GO:0003700);; Cellular Component: nucleus (GO:0005634);; Biological Process: regulation of transcription, DNA-templated (GO:0006355);;	--	--	--	AP2 domain	Ethylene-responsive transcription factor 9 GN=MLN1.14 OS=Arabidopsis thaliana (Mouse-ear cress) PE=2 SV=1	S	Function unknown	PREDICTED: ethylene-responsive transcription factor ESR1-like [Setaria italica]	molecular function: binding (GO:0005488);; biological process: biological regulation (GO:0065007);; molecular function: nucleic acid binding transcription factor activity (GO:0001071);; cellular component: cell (GO:0005623);; cellular component: organelle (GO:0043226);; cellular component: cell part (GO:0044464)	--
BMK_Unigene_007457	AP2/ERF-ERF	TF	22.321	15.2648	13.1592	16.6542	11.1888	12.8066	0.854791	-0.18226	normal	0.864262	-0.214978	normal	0.896087	-0.302952	normal	0.973845	-0.0502984	normal	--	--	Molecular Function: DNA binding (GO:0003677);; Molecular Function: sequence-specific DNA binding transcription factor activity (GO:0003700);; Cellular Component: nucleus (GO:0005634);; Biological Process: regulation of transcription, DNA-templated (GO:0006355);;	K09287|1.88406e-26|zma:100273875|putative AP2/EREBP transcription factor superfamily protein; K09287 RAV-like factor (A)	--	--	AP2 domain	AP2/ERF and B3 domain-containing protein Os05g0549800 OS=Oryza sativa subsp. japonica (Rice) PE=2 SV=1	K	Transcription	putative AP2/EREBP transcription factor superfamily protein [Zea mays]	molecular function: binding (GO:0005488);; biological process: biological regulation (GO:0065007);; molecular function: nucleic acid binding transcription factor activity (GO:0001071);; cellular component: cell (GO:0005623);; cellular component: organelle (GO:0043226);; cellular component: cell part (GO:0044464)	--
BMK_Unigene_007460	AP2/ERF-ERF	TF	4.65015	1.90883	1.62456	2.03074	1.43095	1.96285	0.316687	-0.897801	normal	0.244941	-0.997468	normal	0.891765	-0.21787	normal	0.727957	0.312503	normal	--	--	--	--	--	--	AP2 domain	--	--	--	--	--	--
BMK_Unigene_008740	AP2/ERF-ERF	TF	0.688926	5.0354	0.0922277	1.62916	0.432603	0.26146	0.00345968	3.02767	up	0.57024	-1.71946	normal	0.751897	-1.22725	normal	0.387161	-1.7547	normal	--	--	Biological Process: transcription, DNA-templated (GO:0006351);;	--	--	--	AP2 domain	Ethylene-responsive transcription factor ERF114 GN=ERF114 OS=Arabidopsis thaliana (Mouse-ear cress) PE=2 SV=1	--	--	PREDICTED: ethylene-responsive transcription factor ABR1-like [Setaria italica]	biological process: metabolic process (GO:0008152);; biological process: cellular process (GO:0009987)	--
BMK_Unigene_009474	AP2/ERF-ERF	TF	4.35208	0.380243	0	3.62789	2.98292	0.530435	0.0245524	-2.84889	normal	0.000337004	-5.86273	down	0.993168	-0.0243627	normal	0.190106	-1.99635	normal	--	--	--	--	--	--	AP2 domain	Ethylene-responsive transcription factor ERF112 GN=ERF112 OS=Arabidopsis thaliana (Mouse-ear cress) PE=2 SV=1	S	Function unknown	PREDICTED: ethylene-responsive transcription factor ERF109-like [Setaria italica]	--	--
BMK_Unigene_009654	AP2/ERF-ERF	TF	13.603	4.73398	0.801379	17.955	1.7564	0.298103	0.427872	-1.06728	normal	0.0038337	-3.277	down	0.71476	-1.5775	normal	0.0397767	-3.51778	normal	--	--	Molecular Function: DNA binding (GO:0003677);; Molecular Function: sequence-specific DNA binding transcription factor activity (GO:0003700);; Cellular Component: nucleus (GO:0005634);; Biological Process: regulation of transcription, DNA-templated (GO:0006355);; Cellular Component: plastid (GO:0009536);; Biological Process: defense response to fungus (GO:0050832);;	--	--	--	AP2 domain	Ethylene-responsive transcription factor ERF025 GN=ERF025 OS=Arabidopsis thaliana (Mouse-ear cress) PE=2 SV=1	K	Transcription	PREDICTED: ethylene-responsive transcription factor ERF025-like [Setaria italica]	molecular function: binding (GO:0005488);; biological process: biological regulation (GO:0065007);; molecular function: nucleic acid binding transcription factor activity (GO:0001071);; cellular component: cell (GO:0005623);; cellular component: organelle (GO:0043226);; cellular component: cell part (GO:0044464);; biological process: response to stimulus (GO:0050896);; biological process: multi-o…	--
BMK_Unigene_009876	AP2/ERF-ERF	TF	108.7	169.866	126.304	111.373	174.95	101.335	0.00473687	1.01107	up	0.175057	0.737795	normal	0.175659	0.895474	normal	0.699326	0.226793	normal	--	--	Molecular Function: DNA binding (GO:0003677);; Molecular Function: sequence-specific DNA binding transcription factor activity (GO:0003700);; Cellular Component: nucleus (GO:0005634);; Cellular Component: mitochondrion (GO:0005739);; Biological Process: regulation of transcription, DNA-templated (GO:0006355);; Biological Process: defense response (GO:0006952);;	K09286|6.80574e-150|sbi:SORBI_04g035160|SORBIDRAFT_04g035160, Sb04g035160; hypothetical protein; K09286 EREBP-like factor (A)	--	--	AP2 domain	Ethylene-responsive transcription factor 1 GN=OJ1311_D08.9 OS=Oryza sativa subsp. japonica (Rice) PE=1 SV=1	K	Transcription	hypothetical protein SORBIDRAFT_04g035160 [Sorghum bicolor]	molecular function: binding (GO:0005488);; biological process: biological regulation (GO:0065007);; molecular function: nucleic acid binding transcription factor activity (GO:0001071);; cellular component: cell (GO:0005623);; cellular component: organelle (GO:0043226);; cellular component: cell part (GO:0044464);; biological process: response to stimulus (GO:0050896)	--
BMK_Unigene_010646	AP2/ERF-ERF	TF	1.91262	0.692987	1.02863	1.31148	0.750015	0.217852	0.60326	-0.976702	normal	0.834852	-0.3362	normal	0.875239	-0.403783	normal	0.427495	-1.64599	normal	--	--	Biological Process: transcription, DNA-templated (GO:0006351);;	--	--	--	AP2 domain	Ethylene-responsive transcription factor 15 GN=F16D14.7 OS=Arabidopsis thaliana (Mouse-ear cress) PE=2 SV=1	--	--	PREDICTED: ethylene-responsive transcription factor ERF094-like [Setaria italica]	biological process: metabolic process (GO:0008152);; biological process: cellular process (GO:0009987)	--
BMK_Unigene_010699	AP2/ERF-ERF	TF	0.831834	0.280297	0.0414315	1.4268	0.388677	0.572256	0.60326	-1.03077	normal	0.226049	-2.76678	normal	0.751897	-1.2335	normal	0.699326	-0.798779	normal	--	--	Molecular Function: DNA binding (GO:0003677);; Molecular Function: sequence-specific DNA binding transcription factor activity (GO:0003700);; Cellular Component: nucleus (GO:0005634);; Biological Process: regulation of transcription, DNA-templated (GO:0006355);; Biological Process: ethylene-activated signaling pathway (GO:0009873);;	--	--	--	AP2 domain	Ethylene-responsive transcription factor 12 GN=F3M18.21 OS=Arabidopsis thaliana (Mouse-ear cress) PE=2 SV=1	K	Transcription	PREDICTED: ethylene-responsive transcription factor 8-like [Setaria italica]	molecular function: binding (GO:0005488);; biological process: biological regulation (GO:0065007);; molecular function: nucleic acid binding transcription factor activity (GO:0001071);; cellular component: cell (GO:0005623);; cellular component: organelle (GO:0043226);; cellular component: cell part (GO:0044464);; biological process: cellular process (GO:0009987);; biological process: signaling (…	--
BMK_Unigene_010992	AP2/ERF-ERF	TF	1.54057	0.267791	0.178989	0.998109	2.79091	3.12847	0.210121	-1.5742	normal	0.501572	-1.64142	normal	0.46476	1.51656	normal	0.00411735	2.00654	up	--	--	Molecular Function: DNA binding (GO:0003677);; Molecular Function: sequence-specific DNA binding transcription factor activity (GO:0003700);; Cellular Component: nucleus (GO:0005634);; Cellular Component: mitochondrion (GO:0005739);; Biological Process: regulation of transcription, DNA-templated (GO:0006355);;	K09285|1.81161e-123|sita:101761227|AP2-like ethylene-responsive transcription factor AIL5-like; K09285 AP2-like factor, ANT lineage (A)	--	--	AP2 domain	AP2-like ethylene-responsive transcription factor AIL5 GN=AIL5 OS=Arabidopsis thaliana (Mouse-ear cress) PE=2 SV=2	K	Transcription	PREDICTED: AP2-like ethylene-responsive transcription factor AIL5-like [Setaria italica]	molecular function: binding (GO:0005488);; biological process: biological regulation (GO:0065007);; molecular function: nucleic acid binding transcription factor activity (GO:0001071);; cellular component: cell (GO:0005623);; cellular component: organelle (GO:0043226);; cellular component: cell part (GO:0044464)	--
BMK_Unigene_012833	AP2/ERF-ERF	TF	0.155923	1.49915	0.153097	1.30575	0.3624	0	0.0480164	3.1079	normal	0.953918	0.245781	normal	0.812549	-0.720338	normal	0.163733	-2.75666	normal	--	--	Molecular Function: DNA binding (GO:0003677);; Molecular Function: sequence-specific DNA binding transcription factor activity (GO:0003700);; Cellular Component: nucleus (GO:0005634);; Biological Process: regulation of transcription, DNA-templated (GO:0006355);;	--	--	--	AP2 domain	Ethylene-responsive transcription factor ERF017 GN=ERF017 OS=Arabidopsis thaliana (Mouse-ear cress) PE=2 SV=1	S	Function unknown	PREDICTED: ethylene-responsive transcription factor ERF018-like [Setaria italica]	molecular function: binding (GO:0005488);; biological process: biological regulation (GO:0065007);; molecular function: nucleic acid binding transcription factor activity (GO:0001071);; cellular component: cell (GO:0005623);; cellular component: organelle (GO:0043226);; cellular component: cell part (GO:0044464)	--
BMK_Unigene_014288	AP2/ERF-ERF	TF	27.9545	119.324	105.598	27.8884	54.2686	62.6749	1.0361e-08	2.45303	up	2.23352e-06	2.46619	up	0.190038	1.48991	normal	0.0149173	1.61831	normal	--	--	Molecular Function: iron ion binding (GO:0005506);; Cellular Component: chloroplast (GO:0009507);; Biological Process: response to abscisic acid (GO:0009737);; Biological Process: response to jasmonic acid (GO:0009753);; Biological Process: defense response to bacterium, incompatible interaction (GO:0009816);; Molecular Function: linoleate 13S-lipoxygenase activity (GO:0016165);; Biological Proce…	K15718|2.42987e-34|zma:542495|lipoxygenase (EC:1.13.11.12); K15718 linoleate 9S-lipoxygenase [EC:1.13.11.58] (A)	--	--	AP2 domain	Putative linoleate 9S-lipoxygenase 3 GN=OSJNBb0017F17.2 OS=Oryza sativa subsp. japonica (Rice) PE=3 SV=1	S	Function unknown	lipoxygenase 1.1, partial [Oryza australiensis]	molecular function: binding (GO:0005488);; cellular component: cell (GO:0005623);; cellular component: organelle (GO:0043226);; cellular component: cell part (GO:0044464);; biological process: response to stimulus (GO:0050896);; biological process: immune system process (GO:0002376);; biological process: multi-organism process (GO:0051704);; biological process: metabolic process (GO:0008152);; bi…	Linoleic acid metabolism (ko00591)
BMK_Unigene_014456	AP2/ERF-ERF	TF	0.616482	0.228447	0.503873	2.11218	1.12809	1.60587	0.214567	-1.99237	normal	0.989589	-0.0237093	normal	0.751897	-0.604502	normal	0.992733	0.0111475	normal	--	--	Molecular Function: DNA binding (GO:0003677);; Molecular Function: sequence-specific DNA binding transcription factor activity (GO:0003700);; Cellular Component: nucleus (GO:0005634);; Biological Process: regulation of glycolytic process (GO:0006110);; Biological Process: regulation of transcription, DNA-templated (GO:0006355);; Biological Process: response to sucrose (GO:0009744);; Biological Pr…	--	--	--	AP2 domain	Ethylene-responsive transcription factor WRI1 OS=Arabidopsis thaliana (Mouse-ear cress) PE=2 SV=1	K	Transcription	PREDICTED: ethylene-responsive transcription factor WRI1-like, partial [Setaria italica]	molecular function: binding (GO:0005488);; biological process: biological regulation (GO:0065007);; molecular function: nucleic acid binding transcription factor activity (GO:0001071);; cellular component: cell (GO:0005623);; cellular component: organelle (GO:0043226);; cellular component: cell part (GO:0044464);; biological process: response to stimulus (GO:0050896);; biological process: metabol…	--
BMK_Unigene_016175	AP2/ERF-ERF	TF	130.102	67.7527	74.1973	140.424	100.759	63.9943	0.0805823	-0.81349	normal	0.267909	-0.882554	normal	0.751897	-0.306352	normal	0.00832963	-1.06231	down	--	--	Molecular Function: DNA binding (GO:0003677);; Molecular Function: sequence-specific DNA binding transcription factor activity (GO:0003700);; Cellular Component: nucleus (GO:0005634);; Biological Process: regulation of transcription, DNA-templated (GO:0006355);; Cellular Component: cytoplasmic membrane-bounded vesicle (GO:0016023);;	K17338|6.88594e-110|sita:101754816|HVA22-like protein j-like; K17338 receptor expression-enhancing protein 1/2/3/4 (A)	[V]	Defense mechanisms	AP2 domain;; TB2/DP1, HVA22 family	HVA22-like protein j GN=HVA22J OS=Arabidopsis thaliana (Mouse-ear cress) PE=2 SV=2	V	Defense mechanisms	PREDICTED: HVA22-like protein j-like isoform X2 [Setaria italica]	molecular function: binding (GO:0005488);; biological process: biological regulation (GO:0065007);; molecular function: nucleic acid binding transcription factor activity (GO:0001071);; cellular component: cell (GO:0005623);; cellular component: organelle (GO:0043226);; cellular component: cell part (GO:0044464)	--
BMK_Unigene_016559	AP2/ERF-ERF	TF	97.0425	76.9649	37.8963	67.7791	64.5829	43.5427	0.952928	0.0399197	normal	0.0570894	-0.827774	normal	0.833082	0.22501	normal	0.699326	-0.246477	normal	--	--	Molecular Function: DNA binding (GO:0003677);; Molecular Function: sequence-specific DNA binding transcription factor activity (GO:0003700);; Cellular Component: nucleus (GO:0005634);; Biological Process: regulation of transcription, DNA-templated (GO:0006355);; Biological Process: response to salt stress (GO:0009651);; Biological Process: response to abscisic acid (GO:0009737);; Biological Proce…	K09284|3.98959e-161|sita:101768223|ethylene-responsive transcription factor RAP2-7-like; K09284 AP2-like factor, euAP2 lineage (A)	--	--	AP2 domain	Floral homeotic protein APETALA 2 GN=AP2 OS=Arabidopsis thaliana (Mouse-ear cress) PE=1 SV=1	--	--	PREDICTED: LOW QUALITY PROTEIN: ethylene-responsive transcription factor RAP2-7-like [Setaria italica]	molecular function: binding (GO:0005488);; biological process: biological regulation (GO:0065007);; molecular function: nucleic acid binding transcription factor activity (GO:0001071);; cellular component: cell (GO:0005623);; cellular component: organelle (GO:0043226);; cellular component: cell part (GO:0044464);; biological process: response to stimulus (GO:0050896);; biological process: multice…	--
BMK_Unigene_017078	AP2/ERF-ERF	TF	1.87588	6.39614	5.94748	0.556726	1.9929	1.24028	0.0105744	2.02905	normal	0.0134839	2.0775	normal	0.169218	1.91268	normal	0.490151	1.29807	normal	--	--	Molecular Function: DNA binding (GO:0003677);; Molecular Function: sequence-specific DNA binding transcription factor activity (GO:0003700);; Molecular Function: protein binding (GO:0005515);; Cellular Component: nucleus (GO:0005634);; Biological Process: regulation of transcription, DNA-templated (GO:0006355);; Cellular Component: plastid (GO:0009536);; Molecular Function: ion binding (GO:004316…	--	--	--	AP2 domain	Ethylene-responsive transcription factor ERF034 OS=Arabidopsis thaliana (Mouse-ear cress) PE=2 SV=2	S	Function unknown	PREDICTED: ethylene-responsive transcription factor ERF034-like [Setaria italica]	molecular function: binding (GO:0005488);; biological process: biological regulation (GO:0065007);; molecular function: nucleic acid binding transcription factor activity (GO:0001071);; cellular component: cell (GO:0005623);; cellular component: organelle (GO:0043226);; cellular component: cell part (GO:0044464)	--
BMK_Unigene_025690	AP2/ERF-ERF	TF	0.261819	0.948898	0.414105	0.347569	0.342063	0.859993	0.493497	1.78241	normal	0.748485	0.88465	normal	0.978679	0.151904	normal	0.606866	1.28927	normal	--	--	Cellular Component: plastid (GO:0009536);;	--	--	--	AP2 domain	Pathogenesis-related genes transcriptional activator PTI5 GN=PTI5 OS=Solanum lycopersicum (Tomato) PE=2 SV=1	K	Transcription	PREDICTED: ethylene-responsive transcription factor ERF094-like [Setaria italica]	cellular component: cell (GO:0005623);; cellular component: organelle (GO:0043226);; cellular component: cell part (GO:0044464)	--
BMK_Unigene_029295	AP2/ERF-ERF	TF	0	0.245766	0	0.238561	0	0	0.60326	1.45718	normal	--	--	--	0.751897	-0.741552	normal	0.699326	-0.799459	normal	--	--	Molecular Function: DNA binding (GO:0003677);; Molecular Function: sequence-specific DNA binding transcription factor activity (GO:0003700);; Cellular Component: nucleus (GO:0005634);; Cellular Component: plastid (GO:0009536);; Biological Process: positive regulation of transcription, DNA-templated (GO:0045893);; Biological Process: defense response to fungus (GO:0050832);;	--	--	--	AP2 domain	Ethylene-responsive transcription factor ERF025 GN=ERF025 OS=Arabidopsis thaliana (Mouse-ear cress) PE=2 SV=1	K	Transcription	PREDICTED: ethylene-responsive transcription factor ERF025-like isoform X2 [Setaria italica]	molecular function: binding (GO:0005488);; biological process: biological regulation (GO:0065007);; molecular function: nucleic acid binding transcription factor activity (GO:0001071);; cellular component: cell (GO:0005623);; cellular component: organelle (GO:0043226);; cellular component: cell part (GO:0044464);; biological process: response to stimulus (GO:0050896);; biological process: multi-o…	--
BMK_Unigene_032261	AP2/ERF-ERF	TF	16.49	156.366	47.6148	118.542	39.6794	147.991	1.09054e-07	3.61373	up	0.135619	1.80793	normal	0.955338	-0.235726	normal	0.501625	1.15849	normal	--	--	Biological Process: transcription, DNA-templated (GO:0006351);; Cellular Component: intracellular membrane-bounded organelle (GO:0043231);;	--	--	--	AP2 domain	Ethylene-responsive transcription factor ERF071 GN=ERF071 OS=Arabidopsis thaliana (Mouse-ear cress) PE=2 SV=1	--	--	Putative protein containing AP2 DNA binding domain [Oryza sativa Japonica Group]	biological process: metabolic process (GO:0008152);; biological process: cellular process (GO:0009987);; cellular component: cell (GO:0005623);; cellular component: organelle (GO:0043226);; cellular component: cell part (GO:0044464)	--
BMK_Unigene_033011	AP2/ERF-ERF	TF	1.18749	24.7495	8.00295	3.50849	11.1083	3.60966	8.10131e-13	4.61239	up	0.000182563	3.12293	up	0.529754	1.53074	normal	0.896751	0.288918	normal	--	--	Biological Process: transcription, DNA-templated (GO:0006351);;	--	--	--	AP2 domain	Ethylene-responsive transcription factor RAP2-6 GN=F1I21.18 OS=Arabidopsis thaliana (Mouse-ear cress) PE=2 SV=2	S	Function unknown	PREDICTED: ethylene-responsive transcription factor ABR1-like [Setaria italica]	biological process: metabolic process (GO:0008152);; biological process: cellular process (GO:0009987)	--
BMK_Unigene_036348	AP2/ERF-ERF	TF	29.3482	29.9469	15.1551	47.1803	19.2387	38.0036	0.60326	0.403981	normal	0.65547	-0.400562	normal	0.469889	-1.00993	normal	0.972123	0.0509967	normal	--	--	Molecular Function: DNA binding (GO:0003677);; Molecular Function: sequence-specific DNA binding transcription factor activity (GO:0003700);; Cellular Component: nucleus (GO:0005634);; Biological Process: regulation of transcription, DNA-templated (GO:0006355);; Cellular Component: plastid (GO:0009536);; Biological Process: response to brassinosteroid (GO:0009741);; Biological Process: negative r…	--	--	--	AP2 domain	AP2/ERF and B3 domain-containing protein Os01g0141000 OS=Oryza sativa subsp. japonica (Rice) PE=2 SV=1	K	Transcription	hypothetical protein SORBIDRAFT_03g006590 [Sorghum bicolor]	molecular function: binding (GO:0005488);; biological process: biological regulation (GO:0065007);; molecular function: nucleic acid binding transcription factor activity (GO:0001071);; cellular component: cell (GO:0005623);; cellular component: organelle (GO:0043226);; cellular component: cell part (GO:0044464);; biological process: response to stimulus (GO:0050896);; biological process: multice…	--
BMK_Unigene_040791	AP2/ERF-ERF	TF	118.329	159.476	139.526	132.973	170.195	114.759	0.0261585	0.960232	normal	0.0249728	0.944048	normal	0.553209	0.704808	normal	0.682477	0.277779	normal	--	--	Molecular Function: sequence-specific DNA binding transcription factor activity (GO:0003700);; Cellular Component: nucleus (GO:0005634);; Biological Process: regulation of transcription, DNA-templated (GO:0006355);; Biological Process: response to fungus (GO:0009620);;	K09286|3.9179e-58|sita:101783166|ethylene-responsive transcription factor 2-like; K09286 EREBP-like factor (A)	--	--	AP2 domain	Ethylene-responsive transcription factor 2 GN=ERF2 OS=Nicotiana tabacum (Common tobacco) PE=2 SV=1	K	Transcription	PREDICTED: ethylene-responsive transcription factor 2-like [Setaria italica]	biological process: biological regulation (GO:0065007);; molecular function: nucleic acid binding transcription factor activity (GO:0001071);; cellular component: cell (GO:0005623);; cellular component: organelle (GO:0043226);; cellular component: cell part (GO:0044464);; biological process: response to stimulus (GO:0050896);; biological process: multi-organism process (GO:0051704)	--
BMK_Unigene_040821	AP2/ERF-ERF	TF	119.656	147.772	66.2594	114.824	90.9433	79.8651	0.244753	0.678299	normal	0.650012	-0.337933	normal	0.974745	-0.0557765	normal	0.829873	-0.155471	normal	--	--	Molecular Function: DNA binding (GO:0003677);; Molecular Function: sequence-specific DNA binding transcription factor activity (GO:0003700);; Cellular Component: nucleus (GO:0005634);; Biological Process: regulation of transcription, DNA-templated (GO:0006355);;	--	--	--	AP2 domain	Ethylene-responsive transcription factor ERF008 GN=ERF008 OS=Arabidopsis thaliana (Mouse-ear cress) PE=2 SV=1	K	Transcription	PREDICTED: ethylene-responsive transcription factor ERF008-like [Setaria italica]	molecular function: binding (GO:0005488);; biological process: biological regulation (GO:0065007);; molecular function: nucleic acid binding transcription factor activity (GO:0001071);; cellular component: cell (GO:0005623);; cellular component: organelle (GO:0043226);; cellular component: cell part (GO:0044464)	--
BMK_Unigene_042465	AP2/ERF-ERF	TF	43.1959	38.1586	15.9672	43.7732	33.7535	25.5538	0.773308	0.20524	normal	0.0503047	-1.10784	normal	0.955656	-0.100829	normal	0.652901	-0.420609	normal	--	--	Molecular Function: DNA binding (GO:0003677);; Molecular Function: sequence-specific DNA binding transcription factor activity (GO:0003700);; Cellular Component: nucleus (GO:0005634);; Biological Process: regulation of transcription, DNA-templated (GO:0006355);;	--	--	--	AP2 domain	--	S	Function unknown	ethylene-responsive transcription factor 4 [Zea mays]	molecular function: binding (GO:0005488);; biological process: biological regulation (GO:0065007);; molecular function: nucleic acid binding transcription factor activity (GO:0001071);; cellular component: cell (GO:0005623);; cellular component: organelle (GO:0043226);; cellular component: cell part (GO:0044464)	--
BMK_Unigene_043531	AP2/ERF-ERF	TF	6.06648	24.9252	11.7671	16.3641	35.532	8.85727	3.37421e-05	2.3253	up	0.0381689	1.86703	normal	0.205549	1.43304	normal	0.875524	-0.203908	normal	--	--	Molecular Function: DNA binding (GO:0003677);; Molecular Function: sequence-specific DNA binding transcription factor activity (GO:0003700);; Cellular Component: nucleus (GO:0005634);; Biological Process: regulation of transcription, DNA-templated (GO:0006355);;	--	--	--	AP2 domain	Ethylene-responsive transcription factor ERF053 GN=ERF053 OS=Arabidopsis thaliana (Mouse-ear cress) PE=2 SV=1	K	Transcription	PREDICTED: ethylene-responsive transcription factor ERF053-like [Setaria italica]	molecular function: binding (GO:0005488);; biological process: biological regulation (GO:0065007);; molecular function: nucleic acid binding transcription factor activity (GO:0001071);; cellular component: cell (GO:0005623);; cellular component: organelle (GO:0043226);; cellular component: cell part (GO:0044464)	--
BMK_Unigene_045121	AP2/ERF-ERF	TF	1.33348	0.511182	0.218589	0.378745	1.20513	0.193746	0.60326	-0.929175	normal	0.202087	-1.87846	normal	0.360353	1.63881	normal	0.781254	-0.513848	normal	--	--	Molecular Function: DNA binding (GO:0003677);; Molecular Function: sequence-specific DNA binding transcription factor activity (GO:0003700);; Cellular Component: nucleus (GO:0005634);; Biological Process: regulation of transcription, DNA-templated (GO:0006355);; Biological Process: multicellular organismal development (GO:0007275);;	K09285|9.38912e-137|sita:101758339|AP2-like ethylene-responsive transcription factor BBM-like; K09285 AP2-like factor, ANT lineage (A)	--	--	AP2 domain	AP2-like ethylene-responsive transcription factor BBM2 GN=BBM2 OS=Brassica napus (Rape) PE=2 SV=1	S	Function unknown	PREDICTED: AP2-like ethylene-responsive transcription factor BBM-like [Setaria italica]	molecular function: binding (GO:0005488);; biological process: biological regulation (GO:0065007);; molecular function: nucleic acid binding transcription factor activity (GO:0001071);; cellular component: cell (GO:0005623);; cellular component: organelle (GO:0043226);; cellular component: cell part (GO:0044464);; biological process: multicellular organismal process (GO:0032501);; biological proc…	--
BMK_Unigene_045225	AP2/ERF-ERF	TF	13.2328	72.413	42.9943	62.9669	38.6191	118.738	1.451e-05	3.24591	up	0.00067126	2.93206	up	0.727303	1.07267	normal	0.406592	1.13843	normal	--	--	Cellular Component: intracellular membrane-bounded organelle (GO:0043231);;	--	--	--	AP2 domain	Ethylene-responsive transcription factor ERF113 GN=ERF113 OS=Arabidopsis thaliana (Mouse-ear cress) PE=2 SV=1	K	Transcription	PREDICTED: ethylene-responsive transcription factor RAP2-12-like [Setaria italica]	cellular component: cell (GO:0005623);; cellular component: organelle (GO:0043226);; cellular component: cell part (GO:0044464)	--
BMK_Unigene_045742	AP2/ERF-ERF	TF	18.0852	10.0856	4.82779	20.6035	12.7313	5.48405	0.640071	-0.432317	normal	0.0618586	-1.44905	normal	0.838139	-0.246439	normal	0.0845673	-1.32677	normal	--	--	Molecular Function: DNA binding (GO:0003677);; Molecular Function: sequence-specific DNA binding transcription factor activity (GO:0003700);; Cellular Component: nucleus (GO:0005634);; Biological Process: regulation of transcription, DNA-templated (GO:0006355);;	K09286|1.05639e-67|sita:101766995|ethylene-responsive transcription factor 1-like; K09286 EREBP-like factor (A)	--	--	AP2 domain	Ethylene-responsive transcription factor 1 GN=OJ1311_D08.9 OS=Oryza sativa subsp. japonica (Rice) PE=1 SV=1	K	Transcription	PREDICTED: ethylene-responsive transcription factor 1-like isoform X1 [Setaria italica]	molecular function: binding (GO:0005488);; biological process: biological regulation (GO:0065007);; molecular function: nucleic acid binding transcription factor activity (GO:0001071);; cellular component: cell (GO:0005623);; cellular component: organelle (GO:0043226);; cellular component: cell part (GO:0044464)	--
BMK_Unigene_046201	AP2/ERF-ERF	TF	96.5534	59.5105	52.3369	58.2373	25.2378	21.9794	0.593114	-0.698048	normal	0.525827	-0.744794	normal	0.615556	-1.06755	normal	0.390438	-1.31646	normal	--	--	Molecular Function: sequence-specific DNA binding transcription factor activity (GO:0003700);; Cellular Component: nucleus (GO:0005634);; Biological Process: regulation of transcription, DNA-templated (GO:0006355);; Biological Process: response to fungus (GO:0009620);;	K09286|8.03575e-60|sita:101785711|ethylene-responsive transcription factor 1-like; K09286 EREBP-like factor (A)	--	--	AP2 domain	Ethylene-responsive transcription factor 1 GN=OJ1311_D08.9 OS=Oryza sativa subsp. japonica (Rice) PE=1 SV=1	K	Transcription	PREDICTED: ethylene-responsive transcription factor 1-like [Setaria italica]	biological process: biological regulation (GO:0065007);; molecular function: nucleic acid binding transcription factor activity (GO:0001071);; cellular component: cell (GO:0005623);; cellular component: organelle (GO:0043226);; cellular component: cell part (GO:0044464);; biological process: response to stimulus (GO:0050896);; biological process: multi-organism process (GO:0051704)	--
BMK_Unigene_046475	AP2/ERF-ERF	TF	406.181	379.486	219.168	513.231	285.557	410.954	0.656641	0.266117	normal	0.650012	-0.351426	normal	0.751897	-0.504564	normal	0.926707	0.0689558	normal	--	--	Biological Process: transcription, DNA-templated (GO:0006351);; Cellular Component: plastid (GO:0009536);;	K09286|3.00863e-124|sita:101773791|ethylene-responsive transcription factor 1-like; K09286 EREBP-like factor (A)	--	--	AP2 domain	Ethylene-responsive transcription factor 1 GN=OJ1311_D08.9 OS=Oryza sativa subsp. japonica (Rice) PE=1 SV=1	S	Function unknown	PREDICTED: ethylene-responsive transcription factor 1-like isoform X1 [Setaria italica]	biological process: metabolic process (GO:0008152);; biological process: cellular process (GO:0009987);; cellular component: cell (GO:0005623);; cellular component: organelle (GO:0043226);; cellular component: cell part (GO:0044464)	--
BMK_Unigene_047547	AP2/ERF-ERF	TF	3.15465	0.947209	0.340092	3.85212	2.21989	0.39301	0.346025	-1.30818	normal	0.233266	-1.70073	normal	0.888876	-0.404721	normal	0.0388964	-3.1665	normal	--	--	Molecular Function: DNA binding (GO:0003677);; Molecular Function: sequence-specific DNA binding transcription factor activity (GO:0003700);; Cellular Component: nucleus (GO:0005634);; Cellular Component: mitochondrion (GO:0005739);; Biological Process: regulation of transcription, DNA-templated (GO:0006355);;	K09285|0|sita:101756051|AP2-like ethylene-responsive transcription factor At2g41710-like; K09285 AP2-like factor, ANT lineage (A)	--	--	AP2 domain	AP2-like ethylene-responsive transcription factor At2g41710 GN=At2g41710 OS=Arabidopsis thaliana (Mouse-ear cress) PE=2 SV=2	K	Transcription	PREDICTED: AP2-like ethylene-responsive transcription factor At2g41710-like [Setaria italica]	molecular function: binding (GO:0005488);; biological process: biological regulation (GO:0065007);; molecular function: nucleic acid binding transcription factor activity (GO:0001071);; cellular component: cell (GO:0005623);; cellular component: organelle (GO:0043226);; cellular component: cell part (GO:0044464)	--
BMK_Unigene_050603	AP2/ERF-ERF	TF	86.2892	67.8283	64.2407	91.299	69.5352	75.0711	0.970884	0.0242649	normal	0.949169	0.0690614	normal	0.962876	-0.0968686	normal	0.927289	0.080391	normal	--	--	Molecular Function: DNA binding (GO:0003677);; Molecular Function: sequence-specific DNA binding transcription factor activity (GO:0003700);; Cellular Component: nucleus (GO:0005634);; Biological Process: regulation of transcription, DNA-templated (GO:0006355);;	K09286|4.12129e-43|obr:102722608|ethylene-responsive transcription factor RAP2-4-like; K09286 EREBP-like factor (A)	--	--	AP2 domain	Ethylene-responsive transcription factor RAP2-13 GN=F16L1.8 OS=Arabidopsis thaliana (Mouse-ear cress) PE=1 SV=1	--	--	PREDICTED: ethylene-responsive transcription factor RAP2-4-like [Oryza brachyantha]	molecular function: binding (GO:0005488);; biological process: biological regulation (GO:0065007);; molecular function: nucleic acid binding transcription factor activity (GO:0001071);; cellular component: cell (GO:0005623);; cellular component: organelle (GO:0043226);; cellular component: cell part (GO:0044464)	--
BMK_Unigene_075722	AP2/ERF-ERF	TF	0.473986	0.83811	0.231729	4.41482	0.761308	0.516148	0.60326	1.05523	normal	0.928243	-0.302993	normal	0.751897	-1.35416	normal	0.742098	-0.750205	normal	--	--	Molecular Function: DNA binding (GO:0003677);; Molecular Function: sequence-specific DNA binding transcription factor activity (GO:0003700);; Cellular Component: nucleus (GO:0005634);; Biological Process: regulation of transcription, DNA-templated (GO:0006355);;	--	--	--	AP2 domain	Ethylene-responsive transcription factor ERF109 GN=ERF109 OS=Arabidopsis thaliana (Mouse-ear cress) PE=1 SV=1	K	Transcription	PREDICTED: ethylene-responsive transcription factor ERF109-like [Setaria italica]	molecular function: binding (GO:0005488);; biological process: biological regulation (GO:0065007);; molecular function: nucleic acid binding transcription factor activity (GO:0001071);; cellular component: cell (GO:0005623);; cellular component: organelle (GO:0043226);; cellular component: cell part (GO:0044464)	--
BMK_Unigene_080013	AP2/ERF-ERF	TF	5.47332	0.861813	0.127331	17.0833	1.55262	0.588543	0.0416897	-2.08684	normal	0.000384208	-5.80304	down	0.751897	-1.27146	normal	0.227911	-2.47314	normal	--	--	Molecular Function: DNA binding (GO:0003677);; Molecular Function: sequence-specific DNA binding transcription factor activity (GO:0003700);; Cellular Component: nucleus (GO:0005634);; Biological Process: regulation of transcription, DNA-templated (GO:0006355);; Biological Process: response to stress (GO:0006950);; Cellular Component: plastid (GO:0009536);;	--	--	--	AP2 domain	Dehydration-responsive element-binding protein 1H GN=OSJNOa273B05.9 OS=Oryza sativa subsp. japonica (Rice) PE=3 SV=1	K	Transcription	PREDICTED: dehydration-responsive element-binding protein 1H-like [Setaria italica]	molecular function: binding (GO:0005488);; biological process: biological regulation (GO:0065007);; molecular function: nucleic acid binding transcription factor activity (GO:0001071);; cellular component: cell (GO:0005623);; cellular component: organelle (GO:0043226);; cellular component: cell part (GO:0044464);; biological process: response to stimulus (GO:0050896)	--
BMK_Unigene_081473	AP2/ERF-ERF	TF	41.2223	238.768	110.513	310.096	130.088	625.013	7.24583e-06	2.8495	up	0.1353	1.87904	normal	0.751897	-0.816344	normal	0.699326	1.0039	normal	--	--	--	--	--	--	AP2 domain	Ethylene-responsive transcription factor RAP2-12 GN=T18A20.14 OS=Arabidopsis thaliana (Mouse-ear cress) PE=1 SV=1	S	Function unknown	PREDICTED: ethylene-responsive transcription factor RAP2-12-like [Setaria italica]	--	--
BMK_Unigene_081728	AP2/ERF-ERF	TF	0.935591	4.69377	6.57425	0.0526379	2.36837	0.907351	0.114829	2.33153	normal	0.603352	1.82209	normal	0.256269	2.61021	normal	0.22577	2.425	normal	--	--	Molecular Function: DNA binding (GO:0003677);; Molecular Function: sequence-specific DNA binding transcription factor activity (GO:0003700);; Cellular Component: nucleus (GO:0005634);; Biological Process: regulation of transcription, DNA-templated (GO:0006355);; Biological Process: proline transport (GO:0015824);;	--	--	--	AP2 domain	Ethylene-responsive transcription factor ERF056 GN=ERF056 OS=Arabidopsis thaliana (Mouse-ear cress) PE=2 SV=1	K	Transcription	PREDICTED: ethylene-responsive transcription factor ERF061-like [Setaria italica]	molecular function: binding (GO:0005488);; biological process: biological regulation (GO:0065007);; molecular function: nucleic acid binding transcription factor activity (GO:0001071);; cellular component: cell (GO:0005623);; cellular component: organelle (GO:0043226);; cellular component: cell part (GO:0044464);; biological process: single-organism process (GO:0044699);; biological process: loca…	--
BMK_Unigene_083141	AP2/ERF-ERF	TF	9.12988	10.4999	8.05735	5.0859	8.10101	7.18496	0.358935	0.591886	normal	0.65547	0.327147	normal	0.397613	0.905358	normal	0.441889	0.583636	normal	--	--	Cellular Component: cytoskeleton (GO:0005856);; Biological Process: phagocytosis (GO:0006909);;	--	[S]	Function unknown	AP2 domain;; ELMO/CED-12 family	Ethylene-responsive transcription factor WRI1 OS=Arabidopsis thaliana (Mouse-ear cress) PE=2 SV=1	S	Function unknown	PREDICTED: ELMO domain-containing protein A-like isoform X1 [Setaria italica]	cellular component: cell (GO:0005623);; cellular component: organelle (GO:0043226);; cellular component: cell part (GO:0044464);; biological process: single-organism process (GO:0044699);; biological process: localization (GO:0051179)	--
BMK_Unigene_084789	AP2/ERF-ERF	TF	0	0	0.127031	0.367969	0.23837	0	--	--	--	--	--	--	0.962429	-0.199941	normal	0.699326	-0.799459	normal	--	--	Molecular Function: DNA binding (GO:0003677);; Molecular Function: sequence-specific DNA binding transcription factor activity (GO:0003700);; Cellular Component: nucleus (GO:0005634);; Biological Process: regulation of transcription, DNA-templated (GO:0006355);; Biological Process: response to water deprivation (GO:0009414);; Biological Process: cold acclimation (GO:0009631);;	--	--	--	AP2 domain	Dehydration-responsive element-binding protein 1C OS=Oryza sativa subsp. japonica (Rice) PE=2 SV=1	--	--	PREDICTED: dehydration-responsive element-binding protein 1C-like [Elaeis guineensis]	molecular function: binding (GO:0005488);; biological process: biological regulation (GO:0065007);; molecular function: nucleic acid binding transcription factor activity (GO:0001071);; cellular component: cell (GO:0005623);; cellular component: organelle (GO:0043226);; cellular component: cell part (GO:0044464);; biological process: response to stimulus (GO:0050896)	--
BMK_Unigene_084996	AP2/ERF-ERF	TF	11.7473	67.7011	44.0096	44.7453	43.074	78.7121	4.53237e-10	3.21935	up	0.00517105	2.46345	up	0.795819	-0.570622	normal	0.736176	0.695199	normal	--	--	Molecular Function: DNA binding (GO:0003677);; Molecular Function: sequence-specific DNA binding transcription factor activity (GO:0003700);; Cellular Component: nucleus (GO:0005634);; Biological Process: regulation of transcription, DNA-templated (GO:0006355);;	--	--	--	AP2 domain	Ethylene-responsive transcription factor ERF071 GN=ERF071 OS=Arabidopsis thaliana (Mouse-ear cress) PE=2 SV=1	--	--	putative AP2/EREBP transcription factor superfamily protein [Zea mays]	molecular function: binding (GO:0005488);; biological process: biological regulation (GO:0065007);; molecular function: nucleic acid binding transcription factor activity (GO:0001071);; cellular component: cell (GO:0005623);; cellular component: organelle (GO:0043226);; cellular component: cell part (GO:0044464)	--
BMK_Unigene_085321	AP2/ERF-ERF	TF	3.21508	0.106249	0.0646143	1.27537	0.963323	0.310655	0.207282	-2.81661	normal	0.107559	-3.71387	normal	0.826288	-0.672842	normal	0.678974	-1.22222	normal	--	--	Molecular Function: DNA binding (GO:0003677);; Molecular Function: sequence-specific DNA binding transcription factor activity (GO:0003700);; Cellular Component: nucleus (GO:0005634);; Biological Process: regulation of transcription, DNA-templated (GO:0006355);;	K09284|7.87693e-121|sita:101772000|floral homeotic protein APETALA 2-like; K09284 AP2-like factor, euAP2 lineage (A)	--	--	AP2 domain	Floral homeotic protein APETALA 2 GN=AP2 OS=Arabidopsis thaliana (Mouse-ear cress) PE=1 SV=1	K	Transcription	PREDICTED: floral homeotic protein APETALA 2-like [Setaria italica]	molecular function: binding (GO:0005488);; biological process: biological regulation (GO:0065007);; molecular function: nucleic acid binding transcription factor activity (GO:0001071);; cellular component: cell (GO:0005623);; cellular component: organelle (GO:0043226);; cellular component: cell part (GO:0044464)	--
BMK_Unigene_085840	AP2/ERF-ERF	TF	6.70647	15.2551	10.4491	9.31311	15.6364	9.14257	0.0227539	1.48598	normal	0.384598	0.911463	normal	0.0307697	1.34207	normal	0.794405	0.257577	normal	--	--	Molecular Function: DNA binding (GO:0003677);; Molecular Function: sequence-specific DNA binding transcription factor activity (GO:0003700);; Cellular Component: nucleus (GO:0005634);; Biological Process: regulation of transcription, DNA-templated (GO:0006355);;	--	--	--	AP2 domain	Ethylene-responsive transcription factor-like protein At4g13040 GN=At4g13040 OS=Arabidopsis thaliana (Mouse-ear cress) PE=2 SV=2	--	--	PREDICTED: ethylene-responsive transcription factor-like protein At4g13040-like isoform X1 [Setaria italica]	molecular function: binding (GO:0005488);; biological process: biological regulation (GO:0065007);; molecular function: nucleic acid binding transcription factor activity (GO:0001071);; cellular component: cell (GO:0005623);; cellular component: organelle (GO:0043226);; cellular component: cell part (GO:0044464)	--
BMK_Unigene_086400	AP2/ERF-ERF	TF	2.70232	0.831303	0.168035	2.8367	1.81714	0.443514	0.316003	-1.87205	normal	0.0209529	-4.5447	normal	0.751897	0.905044	normal	0.972123	0.125206	normal	--	--	Molecular Function: DNA binding (GO:0003677);; Molecular Function: sequence-specific DNA binding transcription factor activity (GO:0003700);; Cellular Component: nucleus (GO:0005634);; Cellular Component: mitochondrion (GO:0005739);; Biological Process: regulation of transcription, DNA-templated (GO:0006355);;	K09285|0|sita:101756051|AP2-like ethylene-responsive transcription factor At2g41710-like; K09285 AP2-like factor, ANT lineage (A)	--	--	AP2 domain	AP2-like ethylene-responsive transcription factor At2g41710 GN=At2g41710 OS=Arabidopsis thaliana (Mouse-ear cress) PE=2 SV=2	K	Transcription	PREDICTED: AP2-like ethylene-responsive transcription factor At2g41710-like [Setaria italica]	molecular function: binding (GO:0005488);; biological process: biological regulation (GO:0065007);; molecular function: nucleic acid binding transcription factor activity (GO:0001071);; cellular component: cell (GO:0005623);; cellular component: organelle (GO:0043226);; cellular component: cell part (GO:0044464)	--
BMK_Unigene_086422	AP2/ERF-ERF	TF	3.34755	4.61227	2.87578	12.2149	5.96162	11.7163	0.534544	0.888467	normal	0.786195	0.506499	normal	0.751897	-0.73877	normal	0.699326	0.403036	normal	--	--	Molecular Function: DNA binding (GO:0003677);; Molecular Function: sequence-specific DNA binding transcription factor activity (GO:0003700);; Cellular Component: nucleus (GO:0005634);; Biological Process: regulation of transcription, DNA-templated (GO:0006355);; Cellular Component: plastid (GO:0009536);; Biological Process: response to brassinosteroid (GO:0009741);; Biological Process: negative r…	--	--	--	AP2 domain	AP2/ERF and B3 domain-containing transcription factor ARF14 GN=ARF14 OS=Arabidopsis thaliana (Mouse-ear cress) PE=2 SV=1	K	Transcription	hypothetical protein SORBIDRAFT_03g006590 [Sorghum bicolor]	molecular function: binding (GO:0005488);; biological process: biological regulation (GO:0065007);; molecular function: nucleic acid binding transcription factor activity (GO:0001071);; cellular component: cell (GO:0005623);; cellular component: organelle (GO:0043226);; cellular component: cell part (GO:0044464);; biological process: response to stimulus (GO:0050896);; biological process: multice…	--
BMK_Unigene_089028	AP2/ERF-ERF	TF	521.634	368.5	481.437	604.239	350.636	474.917	0.81793	-0.15833	normal	0.917414	-0.0952177	normal	0.89638	0.167017	normal	0.478907	0.473545	normal	--	--	Molecular Function: DNA binding (GO:0003677);; Molecular Function: sequence-specific DNA binding transcription factor activity (GO:0003700);; Cellular Component: nucleus (GO:0005634);; Biological Process: regulation of transcription, DNA-templated (GO:0006355);; Cellular Component: plastid (GO:0009536);;	K09286|2.98399e-119|sita:101781253|ethylene-responsive transcription factor RAP2-4-like; K09286 EREBP-like factor (A)	--	--	AP2 domain	Ethylene-responsive transcription factor RAP2-4 OS=Arabidopsis thaliana (Mouse-ear cress) PE=1 SV=1	K	Transcription	PREDICTED: ethylene-responsive transcription factor RAP2-4-like [Setaria italica]	molecular function: binding (GO:0005488);; biological process: biological regulation (GO:0065007);; molecular function: nucleic acid binding transcription factor activity (GO:0001071);; cellular component: cell (GO:0005623);; cellular component: organelle (GO:0043226);; cellular component: cell part (GO:0044464)	--
BMK_Unigene_089626	AP2/ERF-ERF	TF	0.253777	0.12023	0.0897092	1.43506	0.519231	0.623672	0.786824	-0.597504	normal	0.669709	-0.846364	normal	0.560118	-1.05639	normal	0.516224	-0.776137	normal	--	--	Molecular Function: DNA binding (GO:0003677);; Molecular Function: sequence-specific DNA binding transcription factor activity (GO:0003700);; Cellular Component: nucleus (GO:0005634);; Biological Process: regulation of transcription, DNA-templated (GO:0006355);;	K09285|3.36743e-140|sita:101778390|AP2-like ethylene-responsive transcription factor ANT-like; K09285 AP2-like factor, ANT lineage (A)	--	--	AP2 domain	AP2-like ethylene-responsive transcription factor AIL1 GN=AIL1 OS=Arabidopsis thaliana (Mouse-ear cress) PE=2 SV=1	--	--	PREDICTED: AP2-like ethylene-responsive transcription factor ANT-like [Setaria italica]	molecular function: binding (GO:0005488);; biological process: biological regulation (GO:0065007);; molecular function: nucleic acid binding transcription factor activity (GO:0001071);; cellular component: cell (GO:0005623);; cellular component: organelle (GO:0043226);; cellular component: cell part (GO:0044464)	--
BMK_Unigene_091763	AP2/ERF-ERF	TF	4.32445	0.22954	1.53552	4.33412	0.766016	1.18386	0.00165304	-3.51387	down	0.543632	-0.897472	normal	0.168188	-1.91803	normal	0.456549	-1.27551	normal	--	--	Molecular Function: DNA binding (GO:0003677);; Molecular Function: sequence-specific DNA binding transcription factor activity (GO:0003700);; Cellular Component: nucleus (GO:0005634);; Biological Process: regulation of transcription, DNA-templated (GO:0006355);; Biological Process: response to water deprivation (GO:0009414);; Cellular Component: plastid (GO:0009536);; Biological Process: response…	K09285|1.47838e-65|obr:102717923|AP2-like ethylene-responsive transcription factor At1g16060-like; K09285 AP2-like factor, ANT lineage (A)	--	--	AP2 domain	AP2-like ethylene-responsive transcription factor At1g16060 GN=At1g16060 OS=Arabidopsis thaliana (Mouse-ear cress) PE=2 SV=1	K	Transcription	PREDICTED: AP2-like ethylene-responsive transcription factor At1g16060-like [Oryza brachyantha]	molecular function: binding (GO:0005488);; biological process: biological regulation (GO:0065007);; molecular function: nucleic acid binding transcription factor activity (GO:0001071);; cellular component: cell (GO:0005623);; cellular component: organelle (GO:0043226);; cellular component: cell part (GO:0044464);; biological process: response to stimulus (GO:0050896)	--
BMK_Unigene_105303	AP2/ERF-ERF	TF	0	0	0.182457	0.114235	0	0.0579153	--	--	--	0.63683	1.72481	normal	0.751897	-0.71312	normal	0.967354	-0.144514	normal	--	--	Molecular Function: DNA binding (GO:0003677);; Molecular Function: sequence-specific DNA binding transcription factor activity (GO:0003700);; Cellular Component: nucleus (GO:0005634);; Biological Process: starch metabolic process (GO:0005982);; Biological Process: circadian rhythm (GO:0007623);; Biological Process: response to water deprivation (GO:0009414);; Biological Process: cold acclimation …	K09286|1.14041e-93|ath:AT4G25470|CBF2; dehydration-responsive element-binding protein 1C; K09286 EREBP-like factor (A)	--	--	AP2 domain	Dehydration-responsive element-binding protein 1C GN=M7J2.161 OS=Arabidopsis thaliana (Mouse-ear cress) PE=2 SV=2	K	Transcription	dehydration-responsive element-binding protein 1C [Arabidopsis thaliana]	molecular function: binding (GO:0005488);; biological process: biological regulation (GO:0065007);; molecular function: nucleic acid binding transcription factor activity (GO:0001071);; cellular component: cell (GO:0005623);; cellular component: organelle (GO:0043226);; cellular component: cell part (GO:0044464);; biological process: metabolic process (GO:0008152);; biological process: cellular p…	--
BMK_Unigene_011185	AP2/ERF-RAV	TF	25.4893	64.1779	31.2577	39.1377	38.7866	58.8198	0.0863153	0.996584	normal	0.897895	-0.176007	normal	0.742904	-0.735172	normal	0.432389	0.721629	normal	--	--	Molecular Function: DNA binding (GO:0003677);; Molecular Function: sequence-specific DNA binding transcription factor activity (GO:0003700);; Cellular Component: nucleus (GO:0005634);; Biological Process: regulation of transcription, DNA-templated (GO:0006355);; Biological Process: post-embryonic development (GO:0009791);; Biological Process: single-organism developmental process (GO:0044767);; B…	K09287|2.83608e-110|sita:101782792|AP2/ERF and B3 domain-containing protein Os05g0549800-like; K09287 RAV-like factor (A)	--	--	B3 DNA binding domain;; AP2 domain	AP2/ERF and B3 domain-containing protein Os05g0549800 OS=Oryza sativa subsp. japonica (Rice) PE=2 SV=1	K	Transcription	PREDICTED: AP2/ERF and B3 domain-containing protein Os05g0549800-like [Setaria italica]	molecular function: binding (GO:0005488);; biological process: biological regulation (GO:0065007);; molecular function: nucleic acid binding transcription factor activity (GO:0001071);; cellular component: cell (GO:0005623);; cellular component: organelle (GO:0043226);; cellular component: cell part (GO:0044464);; biological process: multicellular organismal process (GO:0032501);; biological proc…	--
BMK_Unigene_000899	B3	TF	28.891	28.4394	24.9795	22.8432	32.6678	17.9382	0.152443	0.9794	normal	0.0326465	1.44405	normal	7.60441e-05	2.04999	up	0.000240373	1.3777	up	[M]	Cell wall/membrane/envelope biogenesis	Molecular Function: DNA binding (GO:0003677);; Molecular Function: sequence-specific DNA binding transcription factor activity (GO:0003700);; Cellular Component: nucleus (GO:0005634);; Biological Process: regulation of transcription, DNA-templated (GO:0006355);; Molecular Function: zinc ion binding (GO:0008270);; Cellular Component: plastid (GO:0009536);;	--	[M]	Cell wall/membrane/envelope biogenesis	B3 DNA binding domain;; CW-type Zinc Finger;; Cotton fibre expressed protein;; Domain of unknown function (DUF4408);; Choline/ethanolamine kinase;; Phosphotransferase enzyme family;; Ecdysteroid kinase	B3 domain-containing protein Os07g0563300 GN=OJ1720_F04.105 OS=Oryza sativa subsp. japonica (Rice) PE=3 SV=2	K	Transcription	PREDICTED: B3 domain-containing protein Os07g0563300-like [Setaria italica]	molecular function: binding (GO:0005488);; biological process: biological regulation (GO:0065007);; molecular function: nucleic acid binding transcription factor activity (GO:0001071);; cellular component: cell (GO:0005623);; cellular component: organelle (GO:0043226);; cellular component: cell part (GO:0044464)	--
BMK_Unigene_000987	B3	TF	12.4273	2.50786	2.72292	13.889	5.82021	1.96995	0.00190964	-1.98292	down	0.00981082	-1.87572	down	0.428143	-0.978555	normal	0.00079281	-2.34841	down	--	--	Molecular Function: DNA binding (GO:0003677);; Cellular Component: nucleus (GO:0005634);; Biological Process: regulation of transcription, DNA-templated (GO:0006355);; Biological Process: auxin-activated signaling pathway (GO:0009734);; Biological Process: leaf senescence (GO:0010150);; Molecular Function: protein dimerization activity (GO:0046983);;	K14486|4.46051e-165|sita:101783298|auxin response factor 9-like; K14486 auxin response factor (A)	--	--	B3 DNA binding domain	Auxin response factor 9 GN=OSJNBa0064D20.11 OS=Oryza sativa subsp. japonica (Rice) PE=2 SV=1	K	Transcription	PREDICTED: auxin response factor 9-like [Setaria italica]	molecular function: binding (GO:0005488);; cellular component: cell (GO:0005623);; cellular component: organelle (GO:0043226);; cellular component: cell part (GO:0044464);; biological process: biological regulation (GO:0065007);; biological process: cellular process (GO:0009987);; biological process: signaling (GO:0023052);; biological process: single-organism process (GO:0044699);; biological pr…	Plant hormone signal transduction (ko04075)
BMK_Unigene_001159	B3	TF	33.6217	10.2168	10.0346	29.4342	14.3238	12.5912	0.000382358	-1.33076	down	0.00639488	-1.22098	down	0.227075	-0.749409	normal	0.0196628	-0.830385	normal	--	--	Molecular Function: DNA binding (GO:0003677);; Molecular Function: sequence-specific DNA binding transcription factor activity (GO:0003700);; Cellular Component: nucleus (GO:0005634);; Cellular Component: mitochondrion (GO:0005739);; Molecular Function: zinc ion binding (GO:0008270);; Biological Process: response to abscisic acid (GO:0009737);; Biological Process: response to sucrose (GO:0009744)…	--	--	--	B3 DNA binding domain;; CW-type Zinc Finger	B3 domain-containing protein Os07g0679700 GN=OJ1205_F02.12 OS=Oryza sativa subsp. japonica (Rice) PE=2 SV=1	K	Transcription	PREDICTED: B3 domain-containing protein Os07g0679700-like isoform X3 [Setaria italica]	molecular function: binding (GO:0005488);; biological process: biological regulation (GO:0065007);; molecular function: nucleic acid binding transcription factor activity (GO:0001071);; cellular component: cell (GO:0005623);; cellular component: organelle (GO:0043226);; cellular component: cell part (GO:0044464);; biological process: response to stimulus (GO:0050896)	--
BMK_Unigene_001300	B3	TF	1.08606	0.297714	0.269597	4.34982	1.54455	2.9749	0.074692	-1.54399	normal	0.0729561	-1.59792	normal	0.0435848	-1.1708	normal	0.797139	-0.175103	normal	--	--	--	--	--	--	B3 DNA binding domain;; B3 DNA binding domain;; B3 DNA binding domain	Putative B3 domain-containing protein Os04g0347400 OS=Oryza sativa subsp. japonica (Rice) PE=3 SV=3	--	--	PREDICTED: putative B3 domain-containing protein Os04g0347400-like isoform X1 [Setaria italica]	--	--
BMK_Unigene_003333	B3	TF	4.97762	1.39428	0.930881	0.738563	0.353357	0.340351	0.411605	-1.73295	normal	0.517471	-1.44069	normal	0.989392	-0.0415049	normal	0.741249	-0.617134	normal	--	--	--	--	--	--	B3 DNA binding domain	B3 domain-containing protein Os03g0620400 OS=Oryza sativa subsp. japonica (Rice) PE=2 SV=1	K	Transcription	Os03g0620400 [Oryza sativa Japonica Group]	--	--
BMK_Unigene_005819	B3	TF	3.25438	1.44737	0.528549	0.475895	0.313938	0.0319521	0.581471	-0.760966	normal	0.381148	-1.86299	normal	0.941365	-0.283396	normal	0.324315	-2.1361	normal	--	--	Molecular Function: binding (GO:0005488);;	--	--	--	B3 DNA binding domain	B3 domain-containing protein Os03g0619600 OS=Oryza sativa subsp. japonica (Rice) PE=2 SV=1	--	--	PREDICTED: B3 domain-containing protein Os03g0619800-like isoform X1 [Setaria italica]	molecular function: binding (GO:0005488)	--
BMK_Unigene_006314	B3	TF	4.51308	1.13469	1.09011	0.849033	0.611812	0.316741	0.0545779	-1.38516	normal	0.038642	-1.86365	normal	0.96368	0.184272	normal	0.955989	-0.171501	normal	--	--	Molecular Function: binding (GO:0005488);;	--	--	--	B3 DNA binding domain;; B3 DNA binding domain	B3 domain-containing protein Os03g0619600 OS=Oryza sativa subsp. japonica (Rice) PE=2 SV=1	K	Transcription	PREDICTED: B3 domain-containing protein Os03g0619600-like isoform X1 [Setaria italica]	molecular function: binding (GO:0005488)	--
BMK_Unigene_009395	B3	TF	2.25505	3.70303	1.57305	1.25261	1.50569	1.58171	0.41393	1.03278	normal	0.978831	-0.0388225	normal	0.751897	0.510794	normal	0.699326	0.63681	normal	--	--	Molecular Function: DNA binding (GO:0003677);; Cellular Component: nucleus (GO:0005634);; Biological Process: regulation of transcription, DNA-templated (GO:0006355);; Cellular Component: plastid (GO:0009536);;	--	--	--	B3 DNA binding domain	B3 domain-containing protein Os04g0386900 GN=OSJNBa0044M19.12 OS=Oryza sativa subsp. japonica (Rice) PE=2 SV=3	R	General function prediction only	PREDICTED: B3 domain-containing protein Os04g0386900-like [Setaria italica]	molecular function: binding (GO:0005488);; cellular component: cell (GO:0005623);; cellular component: organelle (GO:0043226);; cellular component: cell part (GO:0044464);; biological process: biological regulation (GO:0065007)	--
BMK_Unigene_030699	B3	TF	3.0569	1.34436	2.77911	0	0.0639069	0	0.569449	-0.779557	normal	0.709523	0.379194	normal	0.751897	0.786137	normal	--	--	--	--	--	--	--	--	--	B3 DNA binding domain	Putative B3 domain-containing protein Os04g0346900 GN=OSJNBa0020I02.5 OS=Oryza sativa subsp. japonica (Rice) PE=3 SV=2	K	Transcription	PREDICTED: putative B3 domain-containing protein Os04g0347400 [Zea mays]	--	--
BMK_Unigene_036261	B3	TF	15.0615	4.15627	2.97479	0.744411	0.403102	0.555678	0.00093949	-1.46875	down	0.000153221	-1.77526	down	0.990948	0.0318579	normal	0.707339	0.490881	normal	--	--	--	--	--	--	B3 DNA binding domain;; B3 DNA binding domain	B3 domain-containing protein Os03g0620400 OS=Oryza sativa subsp. japonica (Rice) PE=2 SV=1	K	Transcription	Os03g0620400 [Oryza sativa Japonica Group]	--	--
BMK_Unigene_036841	B3	TF	0	0.55858	0.10556	0.21082	0	0	0.448521	2.32127	normal	--	--	--	0.751897	-0.71312	normal	0.699326	-0.770195	normal	--	--	--	--	--	--	B3 DNA binding domain	Putative B3 domain-containing protein Os04g0346900 GN=OSJNBa0020I02.5 OS=Oryza sativa subsp. japonica (Rice) PE=3 SV=2	--	--	PREDICTED: putative B3 domain-containing protein Os04g0347400-like isoform X2 [Setaria italica]	--	--
BMK_Unigene_038292	B3	TF	2.41713	1.35765	0.704354	2.12763	0.58079	0.738564	0.569644	-1.38133	normal	0.718148	-0.806078	normal	0.785169	-0.78571	normal	0.359572	-2.1193	normal	--	--	Molecular Function: DNA binding (GO:0003677);; Cellular Component: nucleus (GO:0005634);; Biological Process: regulation of transcription, DNA-templated (GO:0006355);; Biological Process: response to hormone (GO:0009725);;	K14486|0|sita:101786550|auxin response factor 14-like; K14486 auxin response factor (A)	--	--	B3 DNA binding domain;; Auxin response factor	Auxin response factor 14 GN=P0022D06.14 OS=Oryza sativa subsp. japonica (Rice) PE=2 SV=2	K	Transcription	PREDICTED: auxin response factor 14-like [Setaria italica]	molecular function: binding (GO:0005488);; cellular component: cell (GO:0005623);; cellular component: organelle (GO:0043226);; cellular component: cell part (GO:0044464);; biological process: biological regulation (GO:0065007);; biological process: response to stimulus (GO:0050896)	Plant hormone signal transduction (ko04075)
BMK_Unigene_039583	B3	TF	2.58176	0	0	0.485697	0.15076	0.144259	0.00161671	-5.52793	down	0.00317811	-5.27864	down	0.845917	-0.634517	normal	0.784348	-0.713012	normal	--	--	Molecular Function: DNA binding (GO:0003677);; Cellular Component: nucleus (GO:0005634);; Biological Process: regulation of transcription, DNA-templated (GO:0006355);; Biological Process: response to karrikin (GO:0080167);;	--	--	--	B3 DNA binding domain	B3 domain-containing protein Os11g0156000 OS=Oryza sativa subsp. japonica (Rice) PE=2 SV=1	K	Transcription	PREDICTED: B3 domain-containing protein Os11g0156000-like [Setaria italica]	molecular function: binding (GO:0005488);; cellular component: cell (GO:0005623);; cellular component: organelle (GO:0043226);; cellular component: cell part (GO:0044464);; biological process: biological regulation (GO:0065007);; biological process: response to stimulus (GO:0050896)	--
BMK_Unigene_039699	B3	TF	0.292775	0	0.168359	0.269606	0.605003	0.44171	--	--	--	--	--	--	0.98512	0.0997974	normal	--	--	--	--	--	--	--	--	--	B3 DNA binding domain	B3 domain-containing protein Os06g0112300 OS=Oryza sativa subsp. japonica (Rice) PE=2 SV=1	K	Transcription	PREDICTED: B3 domain-containing protein Os06g0112300-like [Setaria italica]	--	--
BMK_Unigene_039767	B3	TF	0.0762497	0.0774233	0.142171	0.734858	0.295549	0.427882	0.969412	0.143823	normal	0.882235	0.510267	normal	0.865739	-0.573155	normal	0.940818	-0.256382	normal	--	--	--	--	--	--	B3 DNA binding domain	B3 domain-containing protein Os12g0591400 OS=Oryza sativa subsp. japonica (Rice) PE=2 SV=1	S	Function unknown	B3 domain-containing protein [Aegilops tauschii]	--	--
BMK_Unigene_040537	B3	TF	2.93253	0.956038	0.97718	1.94525	1.50455	1.34297	0.162481	-1.21227	normal	0.39646	-1.02174	normal	0.983651	-0.0698366	normal	0.925448	-0.139728	normal	--	--	Molecular Function: DNA binding (GO:0003677);; Cellular Component: nucleus (GO:0005634);; Biological Process: regulation of transcription, DNA-templated (GO:0006355);; Cellular Component: cytoplasmic membrane-bounded vesicle (GO:0016023);;	--	--	--	B3 DNA binding domain;; B3 DNA binding domain	Putative B3 domain-containing protein Os03g0621600 GN=OSJNBb0111B07.17 OS=Oryza sativa subsp. japonica (Rice) PE=3 SV=1	--	--	hypothetical protein SORBIDRAFT_01g014450 [Sorghum bicolor]	molecular function: binding (GO:0005488);; cellular component: cell (GO:0005623);; cellular component: organelle (GO:0043226);; cellular component: cell part (GO:0044464);; biological process: biological regulation (GO:0065007)	--
BMK_Unigene_042048	B3	TF	1.3102	0.939811	0.259868	1.56428	1.58549	0.784904	0.561961	0.936427	normal	0.650012	-0.912502	normal	0.968616	-0.142895	normal	0.898241	-0.27647	normal	--	--	--	--	--	--	B3 DNA binding domain;; B3 DNA binding domain;; B3 DNA binding domain	Putative B3 domain-containing protein Os04g0347400 OS=Oryza sativa subsp. japonica (Rice) PE=3 SV=3	K	Transcription	PREDICTED: putative B3 domain-containing protein Os04g0347400-like isoform X2 [Setaria italica]	--	--
BMK_Unigene_042118	B3	TF	9.40337	9.12025	8.23235	11.7804	9.1158	10.0983	0.60326	0.328981	normal	0.650012	0.342133	normal	0.978538	-0.0601992	normal	0.845089	0.163417	normal	--	--	Molecular Function: DNA binding (GO:0003677);; Cellular Component: nucleus (GO:0005634);; Biological Process: regulation of transcription, DNA-templated (GO:0006355);;	--	--	--	B3 DNA binding domain	B3 domain-containing protein Os06g0194400 OS=Oryza sativa subsp. japonica (Rice) PE=2 SV=1	K	Transcription	PREDICTED: B3 domain-containing protein Os06g0194400-like [Setaria italica]	molecular function: binding (GO:0005488);; cellular component: cell (GO:0005623);; cellular component: organelle (GO:0043226);; cellular component: cell part (GO:0044464);; biological process: biological regulation (GO:0065007)	--
BMK_Unigene_042585	B3	TF	8.72578	11.9025	10.7622	7.03853	6.7668	5.86157	0.0420879	1.02398	normal	0.180956	1.07493	normal	0.751897	0.370997	normal	0.681482	0.35818	normal	[S]	Function unknown	Cellular Component: plasma membrane (GO:0005886);; Biological Process: transcription, DNA-templated (GO:0006351);;	--	[R]	General function prediction only	B3 DNA binding domain;; Leucine rich repeat;; Leucine Rich repeats (2 copies);; Leucine Rich Repeat;; Leucine rich repeat;; B3 DNA binding domain	Plant intracellular Ras-group-related LRR protein 7 GN=OsJ_09890 OS=Oryza sativa subsp. japonica (Rice) PE=2 SV=1	R	General function prediction only	LAP4 protein [Zea mays]	cellular component: cell (GO:0005623);; cellular component: membrane (GO:0016020);; cellular component: cell part (GO:0044464);; biological process: metabolic process (GO:0008152);; biological process: cellular process (GO:0009987)	--
BMK_Unigene_044390	B3	TF	10.0935	2.48825	5.89865	10.9631	5.19165	7.05715	0.562271	-1.90939	normal	0.650012	1.1424	normal	0.983727	0.131096	normal	0.961934	0.181517	normal	--	--	Biological Process: transcription, DNA-templated (GO:0006351);;	--	--	--	B3 DNA binding domain	B3 domain-containing protein Os11g0197600 OS=Oryza sativa subsp. japonica (Rice) PE=2 SV=1	K	Transcription	PREDICTED: B3 domain-containing protein Os11g0197600-like [Setaria italica]	biological process: metabolic process (GO:0008152);; biological process: cellular process (GO:0009987)	--
BMK_Unigene_044483	B3	TF	7.97581	0.746108	1.73598	7.91461	4.27195	1.76284	0.420062	-2.41883	normal	0.97693	0.0881872	normal	0.952744	0.222286	normal	0.973845	0.0986944	normal	--	--	Molecular Function: DNA binding (GO:0003677);; Cellular Component: nucleus (GO:0005634);; Biological Process: regulation of transcription, DNA-templated (GO:0006355);; Biological Process: auxin-activated signaling pathway (GO:0009734);; Biological Process: flower development (GO:0009908);; Molecular Function: protein dimerization activity (GO:0046983);;	--	--	--	B3 DNA binding domain	Auxin response factor 25 OS=Oryza sativa subsp. japonica (Rice) PE=2 SV=1	K	Transcription	PREDICTED: auxin response factor 25-like [Setaria italica]	molecular function: binding (GO:0005488);; cellular component: cell (GO:0005623);; cellular component: organelle (GO:0043226);; cellular component: cell part (GO:0044464);; biological process: biological regulation (GO:0065007);; biological process: cellular process (GO:0009987);; biological process: signaling (GO:0023052);; biological process: single-organism process (GO:0044699);; biological pr…	--
BMK_Unigene_046184	B3	TF	0.445737	0.953494	1.5819	0.996825	0.978266	2.39947	0.456342	1.33366	normal	0.0586573	2.16696	normal	0.940439	0.189053	normal	0.0402409	1.57383	normal	--	--	--	--	--	--	B3 DNA binding domain	B3 domain-containing protein Os02g0598200 GN=OJ1212_D02.14 OS=Oryza sativa subsp. japonica (Rice) PE=2 SV=1	K	Transcription	PREDICTED: B3 domain-containing protein Os02g0598200-like [Setaria italica]	--	--
BMK_Unigene_049390	B3	TF	4.70045	2.19362	3.10863	4.50781	3.10734	4.10747	0.193922	-3.26808	normal	0.821972	-0.612176	normal	0.942534	-0.309646	normal	0.846349	-0.55342	normal	--	--	--	--	--	--	B3 DNA binding domain	B3 domain-containing protein Os01g0234100 OS=Oryza sativa subsp. japonica (Rice) PE=2 SV=1	K	Transcription	PREDICTED: B3 domain-containing protein Os01g0234100-like [Setaria italica]	--	--
BMK_Unigene_050529	B3	TF	1.68598	0.873863	1.96485	1.92965	1.05161	0.921299	0.521688	-1.30822	normal	0.979481	-0.0521527	normal	0.95761	-0.19969	normal	0.953593	-0.167594	normal	--	--	Biological Process: transcription, DNA-templated (GO:0006351);;	--	--	--	B3 DNA binding domain	B3 domain-containing protein Os03g0120900 OS=Oryza sativa subsp. japonica (Rice) PE=2 SV=1	K	Transcription	PREDICTED: B3 domain-containing protein Os03g0120900-like [Setaria italica]	biological process: metabolic process (GO:0008152);; biological process: cellular process (GO:0009987)	--
BMK_Unigene_051156	B3	TF	11.9329	4.94999	5.63531	10.5784	7.9945	10.5456	0.827626	-0.305887	normal	0.952477	-0.114237	normal	0.989469	0.0378344	normal	0.627841	0.989708	normal	--	--	Molecular Function: sequence-specific DNA binding transcription factor activity (GO:0003700);; Cellular Component: nucleus (GO:0005634);; Biological Process: regulation of transcription, DNA-templated (GO:0006355);; Molecular Function: transcription regulatory region DNA binding (GO:0044212);;	--	--	--	B3 DNA binding domain	B3 domain-containing protein IDEF1 OS=Oryza sativa subsp. japonica (Rice) PE=2 SV=1	K	Transcription	PREDICTED: B3 domain-containing protein IDEF1-like [Setaria italica]	biological process: biological regulation (GO:0065007);; molecular function: nucleic acid binding transcription factor activity (GO:0001071);; cellular component: cell (GO:0005623);; cellular component: organelle (GO:0043226);; cellular component: cell part (GO:0044464);; molecular function: binding (GO:0005488)	--
BMK_Unigene_051192	B3	TF	7.75499	2.92557	3.05744	2.57468	2.17619	1.081	0.545156	-0.997391	normal	0.474383	-1.3134	normal	0.861404	-0.534409	normal	0.697343	-1.23709	normal	--	--	--	--	--	--	B3 DNA binding domain	Putative B3 domain-containing protein Os04g0346900 GN=OSJNBa0020I02.5 OS=Oryza sativa subsp. japonica (Rice) PE=3 SV=2	K	Transcription	PREDICTED: putative B3 domain-containing protein Os04g0347400-like isoform X2 [Setaria italica]	--	--
BMK_Unigene_051409	B3	TF	6.73711	5.58127	4.30553	7.13086	7.42648	7.22271	0.562253	0.449252	normal	0.993715	-0.00726571	normal	0.751897	0.355295	normal	0.11748	0.736634	normal	--	--	Molecular Function: DNA binding (GO:0003677);; Cellular Component: nucleus (GO:0005634);; Biological Process: regulation of transcription, DNA-templated (GO:0006355);; Molecular Function: metal ion binding (GO:0046872);;	--	--	--	B3 DNA binding domain	B3 domain-containing protein Os03g0619800 OS=Oryza sativa subsp. japonica (Rice) PE=3 SV=1	R	General function prediction only	PREDICTED: uncharacterized protein LOC103643733 [Zea mays]	molecular function: binding (GO:0005488);; cellular component: cell (GO:0005623);; cellular component: organelle (GO:0043226);; cellular component: cell part (GO:0044464);; biological process: biological regulation (GO:0065007)	--
BMK_Unigene_054752	B3	TF	0.197245	0.148003	0.0979471	0.0473441	0.372378	0.639641	0.990659	-0.0388712	normal	0.937612	-0.318014	normal	0.751897	0.991052	normal	0.332761	2.17486	normal	--	--	Molecular Function: DNA binding (GO:0003677);; Cellular Component: nucleus (GO:0005634);; Biological Process: regulation of transcription, DNA-templated (GO:0006355);;	--	--	--	B3 DNA binding domain	B3 domain-containing protein Os01g0723500 OS=Oryza sativa subsp. japonica (Rice) PE=3 SV=1	K	Transcription	hypothetical protein SORBIDRAFT_03g033260 [Sorghum bicolor]	molecular function: binding (GO:0005488);; cellular component: cell (GO:0005623);; cellular component: organelle (GO:0043226);; cellular component: cell part (GO:0044464);; biological process: biological regulation (GO:0065007)	--
BMK_Unigene_068257	B3	TF	2.56082	1.56067	0.436541	0.524024	0.311142	0.13645	0.825743	-0.325041	normal	0.429921	-1.78294	normal	0.92516	-0.359995	normal	0.694564	-1.13634	normal	--	--	Molecular Function: DNA binding (GO:0003677);; Cellular Component: nucleus (GO:0005634);; Biological Process: regulation of transcription, DNA-templated (GO:0006355);; Molecular Function: zinc ion binding (GO:0008270);;	--	--	--	B3 DNA binding domain	B3 domain-containing protein Os03g0619600 OS=Oryza sativa subsp. japonica (Rice) PE=2 SV=1	--	--	PREDICTED: B3 domain-containing protein Os03g0619800-like isoform X3 [Setaria italica]	molecular function: binding (GO:0005488);; cellular component: cell (GO:0005623);; cellular component: organelle (GO:0043226);; cellular component: cell part (GO:0044464);; biological process: biological regulation (GO:0065007)	--
BMK_Unigene_086583	B3	TF	3.30266	1.6409	2.24545	3.40474	2.22786	3.24556	0.664426	1.16019	normal	0.65547	1.30611	normal	0.565144	-1.62943	normal	0.766395	0.466401	normal	--	--	--	--	--	--	B3 DNA binding domain	B3 domain-containing protein Os01g0234100 OS=Oryza sativa subsp. japonica (Rice) PE=2 SV=1	K	Transcription	PREDICTED: B3 domain-containing protein Os01g0234100-like [Setaria italica]	--	--
BMK_Unigene_087469	B3	TF	10.0566	4.37718	5.35566	11.3372	7.89562	10.6482	0.312387	-0.937449	normal	0.529879	-0.761581	normal	0.825486	-0.261323	normal	0.597589	0.458744	normal	--	--	Molecular Function: sequence-specific DNA binding transcription factor activity (GO:0003700);; Cellular Component: nucleus (GO:0005634);; Biological Process: regulation of transcription, DNA-templated (GO:0006355);; Molecular Function: transcription regulatory region DNA binding (GO:0044212);;	--	--	--	B3 DNA binding domain	B3 domain-containing protein IDEF1 OS=Oryza sativa subsp. japonica (Rice) PE=2 SV=1	K	Transcription	PREDICTED: B3 domain-containing protein IDEF1-like [Setaria italica]	biological process: biological regulation (GO:0065007);; molecular function: nucleic acid binding transcription factor activity (GO:0001071);; cellular component: cell (GO:0005623);; cellular component: organelle (GO:0043226);; cellular component: cell part (GO:0044464);; molecular function: binding (GO:0005488)	--
BMK_Unigene_087744	B3	TF	5.45495	1.35614	1.3741	1.48669	1.03659	0.708743	0.676027	-0.766565	normal	0.55536	-1.2398	normal	0.977669	0.111857	normal	0.950217	0.170415	normal	--	--	Molecular Function: DNA binding (GO:0003677);; Cellular Component: nucleus (GO:0005634);; Biological Process: regulation of transcription, DNA-templated (GO:0006355);;	--	--	--	B3 DNA binding domain;; B3 DNA binding domain	B3 domain-containing protein Os03g0620400 OS=Oryza sativa subsp. japonica (Rice) PE=2 SV=1	--	--	PREDICTED: B3 domain-containing protein Os03g0619600-like isoform X1 [Setaria italica]	molecular function: binding (GO:0005488);; cellular component: cell (GO:0005623);; cellular component: organelle (GO:0043226);; cellular component: cell part (GO:0044464);; biological process: biological regulation (GO:0065007)	--
BMK_Unigene_088542	B3	TF	9.81426	2.22207	5.35647	11.7501	5.27664	6.97239	0.015752	-2.86283	normal	0.643236	-0.803254	normal	0.256384	-1.13672	normal	0.298351	-0.897572	normal	--	--	Biological Process: transcription, DNA-templated (GO:0006351);;	--	--	--	B3 DNA binding domain	B3 domain-containing protein Os11g0197600 OS=Oryza sativa subsp. japonica (Rice) PE=2 SV=1	--	--	PREDICTED: B3 domain-containing protein Os11g0197600-like [Setaria italica]	biological process: metabolic process (GO:0008152);; biological process: cellular process (GO:0009987)	--
BMK_Unigene_088779	B3	TF	8.34821	0.814586	1.68421	8.45248	4.33722	1.57656	0.179155	-2.25574	normal	0.190004	-2.34943	normal	0.751897	-0.86654	normal	0.00630362	-3.31574	down	--	--	Molecular Function: DNA binding (GO:0003677);; Cellular Component: nucleus (GO:0005634);; Biological Process: regulation of transcription, DNA-templated (GO:0006355);; Biological Process: auxin-activated signaling pathway (GO:0009734);; Biological Process: flower development (GO:0009908);; Molecular Function: protein dimerization activity (GO:0046983);;	--	--	--	B3 DNA binding domain	Auxin response factor 25 OS=Oryza sativa subsp. japonica (Rice) PE=2 SV=1	--	--	PREDICTED: auxin response factor 25-like [Setaria italica]	molecular function: binding (GO:0005488);; cellular component: cell (GO:0005623);; cellular component: organelle (GO:0043226);; cellular component: cell part (GO:0044464);; biological process: biological regulation (GO:0065007);; biological process: cellular process (GO:0009987);; biological process: signaling (GO:0023052);; biological process: single-organism process (GO:0044699);; biological pr…	--
BMK_Unigene_090369	B3	TF	40.6816	32.7345	20.5996	31.6256	33.7819	21.1368	0.849256	0.218157	normal	0.764412	-0.338378	normal	0.934098	0.154114	normal	0.818883	-0.291809	normal	--	--	Molecular Function: DNA binding (GO:0003677);; Molecular Function: sequence-specific DNA binding transcription factor activity (GO:0003700);; Cellular Component: nucleus (GO:0005634);; Biological Process: regulation of transcription, DNA-templated (GO:0006355);; Molecular Function: zinc ion binding (GO:0008270);; Cellular Component: plastid (GO:0009536);;	--	--	--	B3 DNA binding domain;; CW-type Zinc Finger	B3 domain-containing protein Os07g0563300 GN=OJ1720_F04.105 OS=Oryza sativa subsp. japonica (Rice) PE=3 SV=2	K	Transcription	PREDICTED: B3 domain-containing protein Os07g0563300-like [Setaria italica]	molecular function: binding (GO:0005488);; biological process: biological regulation (GO:0065007);; molecular function: nucleic acid binding transcription factor activity (GO:0001071);; cellular component: cell (GO:0005623);; cellular component: organelle (GO:0043226);; cellular component: cell part (GO:0044464)	--
BMK_Unigene_090993	B3	TF	6.28237	4.15855	3.99204	6.43865	6.75809	5.14067	0.959699	-0.119985	normal	0.650012	0.876485	normal	0.632247	1.24187	normal	0.948595	-0.21893	normal	--	--	Molecular Function: DNA binding (GO:0003677);; Cellular Component: nucleus (GO:0005634);; Biological Process: regulation of transcription, DNA-templated (GO:0006355);; Molecular Function: metal ion binding (GO:0046872);;	--	--	--	B3 DNA binding domain	B3 domain-containing protein Os03g0619800 OS=Oryza sativa subsp. japonica (Rice) PE=3 SV=1	R	General function prediction only	PREDICTED: uncharacterized protein LOC103643733 [Zea mays]	molecular function: binding (GO:0005488);; cellular component: cell (GO:0005623);; cellular component: organelle (GO:0043226);; cellular component: cell part (GO:0044464);; biological process: biological regulation (GO:0065007)	--
BMK_Unigene_091036	B3	TF	8.21367	3.38295	3.10306	2.9706	2.62427	1.5324	0.60326	-0.522159	normal	0.620755	-0.64953	normal	0.985506	-0.0631142	normal	0.98676	-0.0251752	normal	--	--	--	--	--	--	B3 DNA binding domain	Putative B3 domain-containing protein Os04g0346900 GN=OSJNBa0020I02.5 OS=Oryza sativa subsp. japonica (Rice) PE=3 SV=2	K	Transcription	PREDICTED: putative B3 domain-containing protein Os04g0347400-like isoform X2 [Setaria italica]	--	--
BMK_Unigene_092044	B3	TF	0.525408	0.419958	0.767883	1.18656	1.05025	0.892683	0.969565	0.0728088	normal	0.533786	1.01224	normal	0.98512	0.0577825	normal	0.973845	-0.0446922	normal	--	--	--	--	--	--	B3 DNA binding domain	B3 domain-containing protein Os02g0598200 GN=OJ1212_D02.14 OS=Oryza sativa subsp. japonica (Rice) PE=2 SV=1	K	Transcription	PREDICTED: B3 domain-containing protein Os02g0598200-like [Setaria italica]	--	--
BMK_Unigene_092400	B3	TF	1.05844	0.419036	0.157033	1.5091	1.43755	0.669535	--	--	--	--	--	--	0.751897	-0.777319	normal	0.699326	-0.830127	normal	--	--	--	--	--	--	B3 DNA binding domain;; B3 DNA binding domain	Putative B3 domain-containing protein Os04g0347400 OS=Oryza sativa subsp. japonica (Rice) PE=3 SV=3	--	--	PREDICTED: putative B3 domain-containing protein Os04g0347400-like isoform X2 [Setaria italica]	--	--
BMK_Unigene_095881	B3	TF	0.193377	0	0.189271	0	0.274024	0	0.613943	-1.29635	normal	0.967555	0.144112	normal	0.751897	0.879981	normal	--	--	--	--	--	--	--	--	--	B3 DNA binding domain	Putative B3 domain-containing protein Os04g0347400 OS=Oryza sativa subsp. japonica (Rice) PE=3 SV=3	K	Transcription	TPA: hypothetical protein ZEAMMB73_584317 [Zea mays]	--	--
BMK_Unigene_000483	B3-ARF	TF	85.496	67.8307	69.2301	89.3582	87.6613	68.208	0.946523	0.0439916	normal	0.675012	0.217607	normal	0.751897	0.240147	normal	0.97939	-0.013076	normal	--	--	Molecular Function: DNA binding (GO:0003677);; Cellular Component: nucleus (GO:0005634);; Biological Process: regulation of transcription, DNA-templated (GO:0006355);; Biological Process: auxin-activated signaling pathway (GO:0009734);; Molecular Function: protein dimerization activity (GO:0046983);;	--	--	--	Auxin response factor;; AUX/IAA family;; B3 DNA binding domain	Auxin response factor 4 GN=OSJNBa0093F16.35 OS=Oryza sativa subsp. japonica (Rice) PE=2 SV=1	K	Transcription	PREDICTED: auxin response factor 4-like isoform X1 [Setaria italica]	molecular function: binding (GO:0005488);; cellular component: cell (GO:0005623);; cellular component: organelle (GO:0043226);; cellular component: cell part (GO:0044464);; biological process: biological regulation (GO:0065007);; biological process: cellular process (GO:0009987);; biological process: signaling (GO:0023052);; biological process: single-organism process (GO:0044699);; biological pr…	--
BMK_Unigene_001839	B3-ARF	TF	49.1204	35.3995	43.5461	47.9247	43.3892	39.704	0.867682	-0.0947612	normal	0.628868	0.342969	normal	0.924126	0.116935	normal	0.880759	0.0990499	normal	--	--	Molecular Function: DNA binding (GO:0003677);; Molecular Function: GTP binding (GO:0005525);; Cellular Component: nucleus (GO:0005634);; Cellular Component: Golgi apparatus (GO:0005794);; Biological Process: regulation of transcription, DNA-templated (GO:0006355);; Biological Process: small GTPase mediated signal transduction (GO:0007264);; Biological Process: auxin-activated signaling pathway (G…	--	--	--	Auxin response factor;; AUX/IAA family;; B3 DNA binding domain	Auxin response factor 21 OS=Oryza sativa subsp. japonica (Rice) PE=2 SV=2	--	--	PREDICTED: auxin response factor 21-like [Setaria italica]	molecular function: binding (GO:0005488);; cellular component: cell (GO:0005623);; cellular component: organelle (GO:0043226);; cellular component: cell part (GO:0044464);; biological process: biological regulation (GO:0065007);; biological process: cellular process (GO:0009987);; biological process: signaling (GO:0023052);; biological process: single-organism process (GO:0044699);; biological pr…	--
BMK_Unigene_007237	B3-ARF	TF	37.046	4.51422	6.23511	38.0708	8.55673	6.20356	3.20936e-09	-2.55475	down	0.000318766	-1.97161	down	0.000215296	-1.78312	down	1.19351e-08	-2.06658	down	--	--	Molecular Function: DNA binding (GO:0003677);; Cellular Component: nucleus (GO:0005634);; Biological Process: regulation of transcription, DNA-templated (GO:0006355);; Biological Process: auxin-activated signaling pathway (GO:0009734);; Molecular Function: protein dimerization activity (GO:0046983);;	--	--	--	Auxin response factor;; AUX/IAA family;; B3 DNA binding domain	Auxin response factor 1 OS=Oryza sativa subsp. japonica (Rice) PE=2 SV=1	K	Transcription	PREDICTED: auxin response factor 1-like isoform X1 [Setaria italica]	molecular function: binding (GO:0005488);; cellular component: cell (GO:0005623);; cellular component: organelle (GO:0043226);; cellular component: cell part (GO:0044464);; biological process: biological regulation (GO:0065007);; biological process: cellular process (GO:0009987);; biological process: signaling (GO:0023052);; biological process: single-organism process (GO:0044699);; biological pr…	--
BMK_Unigene_012285	B3-ARF	TF	11.5504	6.23416	6.82185	8.9064	6.57364	6.38309	0.266893	-0.657624	normal	0.650012	-0.412741	normal	0.864345	-0.21336	normal	0.750155	-0.211076	normal	--	--	Molecular Function: DNA binding (GO:0003677);; Cellular Component: nucleus (GO:0005634);; Biological Process: regulation of transcription, DNA-templated (GO:0006355);; Biological Process: pattern specification process (GO:0007389);; Biological Process: auxin-activated signaling pathway (GO:0009734);; Biological Process: abscisic acid-activated signaling pathway (GO:0009738);; Biological Process: …	--	--	--	Auxin response factor;; B3 DNA binding domain;; AUX/IAA family	Auxin response factor 22 GN=OSJNBa0093B11.2 OS=Oryza sativa subsp. japonica (Rice) PE=2 SV=1	K	Transcription	PREDICTED: auxin response factor 22-like isoform X1 [Setaria italica]	molecular function: binding (GO:0005488);; cellular component: cell (GO:0005623);; cellular component: organelle (GO:0043226);; cellular component: cell part (GO:0044464);; biological process: biological regulation (GO:0065007);; biological process: multicellular organismal process (GO:0032501);; biological process: developmental process (GO:0032502);; biological process: single-organism process …	--
BMK_Unigene_013053	B3-ARF	TF	1.37032	0.237198	0.623748	1.45671	1.20183	0.852562	0.0352996	-2.05027	normal	0.650012	-0.607515	normal	0.987016	0.0536057	normal	0.757497	-0.361114	normal	--	--	Biological Process: transcription, DNA-templated (GO:0006351);; Biological Process: response to hormone (GO:0009725);; Cellular Component: intracellular membrane-bounded organelle (GO:0043231);; Biological Process: regulation of cellular process (GO:0050794);;	--	--	--	B3 DNA binding domain;; Auxin response factor	Auxin response factor 13 GN=OSJNBa0039K24.27 OS=Oryza sativa subsp. japonica (Rice) PE=2 SV=2	K	Transcription	PREDICTED: auxin response factor 13-like [Setaria italica]	biological process: metabolic process (GO:0008152);; biological process: cellular process (GO:0009987);; biological process: response to stimulus (GO:0050896);; cellular component: cell (GO:0005623);; cellular component: organelle (GO:0043226);; cellular component: cell part (GO:0044464);; biological process: biological regulation (GO:0065007)	--
BMK_Unigene_016431	B3-ARF	TF	3.77795	1.63993	1.31099	7.28335	5.88393	7.66327	0.264738	-0.799904	normal	0.184968	-0.990583	normal	0.984928	-0.0568888	normal	0.699326	0.402409	normal	--	--	Molecular Function: DNA binding (GO:0003677);; Cellular Component: nucleus (GO:0005634);; Biological Process: regulation of transcription, DNA-templated (GO:0006355);; Biological Process: auxin-activated signaling pathway (GO:0009734);;	K14486|0|zma:100384045|pco123854, ARF12; LOC100384045; K14486 auxin response factor (A)	--	--	Auxin response factor;; B3 DNA binding domain	Auxin response factor 2 GN=ARF2 OS=Oryza sativa subsp. japonica (Rice) PE=2 SV=1	--	--	uncharacterized protein LOC100384045 [Zea mays]	molecular function: binding (GO:0005488);; cellular component: cell (GO:0005623);; cellular component: organelle (GO:0043226);; cellular component: cell part (GO:0044464);; biological process: biological regulation (GO:0065007);; biological process: cellular process (GO:0009987);; biological process: signaling (GO:0023052);; biological process: single-organism process (GO:0044699);; biological pr…	Plant hormone signal transduction (ko04075)
BMK_Unigene_020774	B3-ARF	TF	38.1596	22.2553	22.9325	43.8378	31.6116	23.6828	0.313097	-0.507926	normal	0.615807	-0.354872	normal	0.778878	-0.218533	normal	0.160418	-0.625646	normal	--	--	Molecular Function: DNA binding (GO:0003677);; Cellular Component: nucleus (GO:0005634);; Biological Process: regulation of transcription, DNA-templated (GO:0006355);; Biological Process: auxin-activated signaling pathway (GO:0009734);; Biological Process: leaf senescence (GO:0010150);; Molecular Function: protein dimerization activity (GO:0046983);;	K14486|0|sita:101765177|auxin response factor 7-like; K14486 auxin response factor (A)	--	--	AUX/IAA family;; Auxin response factor;; B3 DNA binding domain;; Ring finger domain;; RING-H2 zinc finger;; Zinc finger, C3HC4 type (RING finger);; zinc-RING finger domain;; Zinc finger, C3HC4 type (RING finger);; Zinc finger, C3HC4 type (RING finger)	Auxin response factor 7 GN=OSJNBb0038F20.6 OS=Oryza sativa subsp. japonica (Rice) PE=2 SV=1	--	--	PREDICTED: auxin response factor 7-like isoform X1 [Setaria italica]	molecular function: binding (GO:0005488);; cellular component: cell (GO:0005623);; cellular component: organelle (GO:0043226);; cellular component: cell part (GO:0044464);; biological process: biological regulation (GO:0065007);; biological process: cellular process (GO:0009987);; biological process: signaling (GO:0023052);; biological process: single-organism process (GO:0044699);; biological pr…	Plant hormone signal transduction (ko04075)
BMK_Unigene_048156	B3-ARF	TF	5.43432	1.20141	1.46656	7.03242	3.66008	2.56897	0.9364	-0.142753	normal	0.9687	-0.0619192	normal	0.987016	-0.0516385	normal	0.703443	-0.439094	normal	--	--	Molecular Function: DNA binding (GO:0003677);; Molecular Function: sequence-specific DNA binding transcription factor activity (GO:0003700);; Cellular Component: nucleus (GO:0005634);; Biological Process: regulation of transcription, DNA-templated (GO:0006355);; Cellular Component: plastid (GO:0009536);; Biological Process: auxin-activated signaling pathway (GO:0009734);; Biological Process: dete…	--	--	--	Auxin response factor;; B3 DNA binding domain;; AUX/IAA family	Auxin response factor 12 GN=OSJNBb0004A17.6 OS=Oryza sativa subsp. japonica (Rice) PE=2 SV=1	K	Transcription	PREDICTED: uncharacterized protein LOC100382863 isoform X2 [Zea mays]	molecular function: binding (GO:0005488);; biological process: biological regulation (GO:0065007);; molecular function: nucleic acid binding transcription factor activity (GO:0001071);; cellular component: cell (GO:0005623);; cellular component: organelle (GO:0043226);; cellular component: cell part (GO:0044464);; biological process: cellular process (GO:0009987);; biological process: signaling (…	--
BMK_Unigene_051979	B3-ARF	TF	45.2522	13.7108	16.8804	46.3496	21.5219	17.413	0.00430599	-1.98829	down	0.304771	-1.0004	normal	0.327126	-1.0574	normal	0.358408	-0.819061	normal	--	--	Molecular Function: DNA binding (GO:0003677);; Cellular Component: nucleus (GO:0005634);; Biological Process: regulation of transcription, DNA-templated (GO:0006355);; Biological Process: auxin-activated signaling pathway (GO:0009734);; Biological Process: flower development (GO:0009908);; Molecular Function: protein dimerization activity (GO:0046983);;	--	--	--	Auxin response factor;; B3 DNA binding domain;; AUX/IAA family	Auxin response factor 17 OS=Oryza sativa subsp. japonica (Rice) PE=2 SV=1	K	Transcription	PREDICTED: auxin response factor 17-like [Setaria italica]	molecular function: binding (GO:0005488);; cellular component: cell (GO:0005623);; cellular component: organelle (GO:0043226);; cellular component: cell part (GO:0044464);; biological process: biological regulation (GO:0065007);; biological process: cellular process (GO:0009987);; biological process: signaling (GO:0023052);; biological process: single-organism process (GO:0044699);; biological pr…	--
BMK_Unigene_052049	B3-ARF	TF	15.5638	16.3595	14.159	21.569	23.5117	17.73	0.296661	0.550996	normal	0.249342	0.679475	normal	0.912444	-0.113424	normal	0.433251	-0.39993	normal	--	--	Molecular Function: DNA binding (GO:0003677);; Cellular Component: nucleus (GO:0005634);; Biological Process: regulation of transcription, DNA-templated (GO:0006355);; Biological Process: auxin-activated signaling pathway (GO:0009734);; Molecular Function: protein dimerization activity (GO:0046983);;	--	--	--	Auxin response factor;; AUX/IAA family;; B3 DNA binding domain;; AIG2-like family	Auxin response factor 19 OS=Oryza sativa subsp. japonica (Rice) PE=2 SV=2	K	Transcription	PREDICTED: auxin response factor 19-like isoform X2 [Setaria italica]	molecular function: binding (GO:0005488);; cellular component: cell (GO:0005623);; cellular component: organelle (GO:0043226);; cellular component: cell part (GO:0044464);; biological process: biological regulation (GO:0065007);; biological process: cellular process (GO:0009987);; biological process: signaling (GO:0023052);; biological process: single-organism process (GO:0044699);; biological pr…	--
BMK_Unigene_078485	B3-ARF	TF	1.76747	1.12669	0.566811	1.49397	0.463337	0.697268	--	--	--	0.650012	1.45504	normal	--	--	--	--	--	--	--	--	Molecular Function: DNA binding (GO:0003677);; Cellular Component: nucleus (GO:0005634);; Biological Process: regulation of transcription, DNA-templated (GO:0006355);; Biological Process: auxin-activated signaling pathway (GO:0009734);;	K14486|1.33364e-170|sita:101786550|auxin response factor 14-like; K14486 auxin response factor (A)	--	--	Auxin response factor;; B3 DNA binding domain	Auxin response factor 14 GN=P0022D06.14 OS=Oryza sativa subsp. japonica (Rice) PE=2 SV=2	K	Transcription	PREDICTED: auxin response factor 14-like [Setaria italica]	molecular function: binding (GO:0005488);; cellular component: cell (GO:0005623);; cellular component: organelle (GO:0043226);; cellular component: cell part (GO:0044464);; biological process: biological regulation (GO:0065007);; biological process: cellular process (GO:0009987);; biological process: signaling (GO:0023052);; biological process: single-organism process (GO:0044699);; biological pr…	Plant hormone signal transduction (ko04075)
BMK_Unigene_079896	B3-ARF	TF	7.45913	0.601519	3.1405	11.1675	2.9027	2.38932	0.00776842	-4.95408	down	0.336281	-1.89805	normal	0.309339	-1.42268	normal	0.017489	-2.51653	normal	--	--	Molecular Function: DNA binding (GO:0003677);; Cellular Component: nucleus (GO:0005634);; Biological Process: regulation of transcription, DNA-templated (GO:0006355);; Biological Process: auxin-activated signaling pathway (GO:0009734);;	K14486|0|sita:101776042|auxin response factor 15-like; K14486 auxin response factor (A)	--	--	Auxin response factor;; B3 DNA binding domain	Auxin response factor 15 OS=Oryza sativa subsp. japonica (Rice) PE=2 SV=1	K	Transcription	PREDICTED: auxin response factor 15-like isoform X1 [Setaria italica]	molecular function: binding (GO:0005488);; cellular component: cell (GO:0005623);; cellular component: organelle (GO:0043226);; cellular component: cell part (GO:0044464);; biological process: biological regulation (GO:0065007);; biological process: cellular process (GO:0009987);; biological process: signaling (GO:0023052);; biological process: single-organism process (GO:0044699);; biological pr…	Plant hormone signal transduction (ko04075)
BMK_Unigene_090828	B3-ARF	TF	28.5	9.62537	10.3887	31.439	12.5705	6.48237	0.00877912	-1.1692	down	0.0801483	-0.94725	normal	0.430276	-0.970961	normal	2.82092e-06	-1.85265	down	--	--	Molecular Function: DNA binding (GO:0003677);; Cellular Component: nucleus (GO:0005634);; Biological Process: regulation of transcription, DNA-templated (GO:0006355);; Biological Process: negative regulation of cell proliferation (GO:0008285);; Biological Process: auxin-activated signaling pathway (GO:0009734);; Biological Process: positive regulation of flower development (GO:0009911);; Biologic…	--	--	--	Auxin response factor;; B3 DNA binding domain	Auxin response factor 24 GN=ARF24 OS=Oryza sativa subsp. japonica (Rice) PE=2 SV=1	K	Transcription	PREDICTED: auxin response factor 24-like [Setaria italica]	molecular function: binding (GO:0005488);; cellular component: cell (GO:0005623);; cellular component: organelle (GO:0043226);; cellular component: cell part (GO:0044464);; biological process: biological regulation (GO:0065007);; biological process: cellular process (GO:0009987);; biological process: signaling (GO:0023052);; biological process: single-organism process (GO:0044699);; biological pr…	--
BMK_Unigene_091790	B3-ARF	TF	12.5166	1.2673	1.80743	16.599	5.49877	3.26623	0.271638	-2.11367	normal	0.383799	-1.92145	normal	0.751897	0.551846	normal	0.984485	0.0222982	normal	--	--	Molecular Function: DNA binding (GO:0003677);; Cellular Component: nucleus (GO:0005634);; Biological Process: regulation of transcription, DNA-templated (GO:0006355);; Biological Process: auxin-activated signaling pathway (GO:0009734);; Molecular Function: protein dimerization activity (GO:0046983);;	--	--	--	Auxin response factor;; B3 DNA binding domain	Auxin response factor 1 OS=Oryza sativa subsp. japonica (Rice) PE=2 SV=1	K	Transcription	PREDICTED: auxin response factor 1-like isoform X3 [Setaria italica]	molecular function: binding (GO:0005488);; cellular component: cell (GO:0005623);; cellular component: organelle (GO:0043226);; cellular component: cell part (GO:0044464);; biological process: biological regulation (GO:0065007);; biological process: cellular process (GO:0009987);; biological process: signaling (GO:0023052);; biological process: single-organism process (GO:0044699);; biological pr…	--
BMK_Unigene_091986	B3-ARF	TF	43.8795	13.6289	16.7582	45.8089	21.206	17.2446	0.322869	-0.930981	normal	0.949233	-0.0762668	normal	0.234577	-1.24026	normal	0.133554	-1.16906	normal	--	--	Molecular Function: DNA binding (GO:0003677);; Cellular Component: nucleus (GO:0005634);; Biological Process: regulation of transcription, DNA-templated (GO:0006355);; Biological Process: auxin-activated signaling pathway (GO:0009734);; Biological Process: flower development (GO:0009908);; Molecular Function: protein dimerization activity (GO:0046983);;	--	--	--	Auxin response factor;; B3 DNA binding domain;; AUX/IAA family	Auxin response factor 17 OS=Oryza sativa subsp. japonica (Rice) PE=2 SV=1	K	Transcription	PREDICTED: auxin response factor 17-like [Setaria italica]	molecular function: binding (GO:0005488);; cellular component: cell (GO:0005623);; cellular component: organelle (GO:0043226);; cellular component: cell part (GO:0044464);; biological process: biological regulation (GO:0065007);; biological process: cellular process (GO:0009987);; biological process: signaling (GO:0023052);; biological process: single-organism process (GO:0044699);; biological pr…	--
BMK_Unigene_091992	B3-ARF	TF	12.9381	13.157	10.7254	16.675	20.6954	16.2993	0.841158	0.179206	normal	0.981579	0.0266945	normal	0.396949	0.690699	normal	0.317285	0.540344	normal	--	--	Molecular Function: DNA binding (GO:0003677);; Cellular Component: nucleus (GO:0005634);; Biological Process: regulation of transcription, DNA-templated (GO:0006355);; Biological Process: auxin-activated signaling pathway (GO:0009734);; Molecular Function: protein dimerization activity (GO:0046983);;	--	--	--	Auxin response factor;; AUX/IAA family;; B3 DNA binding domain;; AIG2-like family	Auxin response factor 19 OS=Oryza sativa subsp. japonica (Rice) PE=2 SV=2	K	Transcription	PREDICTED: auxin response factor 19-like isoform X1 [Setaria italica]	molecular function: binding (GO:0005488);; cellular component: cell (GO:0005623);; cellular component: organelle (GO:0043226);; cellular component: cell part (GO:0044464);; biological process: biological regulation (GO:0065007);; biological process: cellular process (GO:0009987);; biological process: signaling (GO:0023052);; biological process: single-organism process (GO:0044699);; biological pr…	--
BMK_Unigene_092484	B3-ARF	TF	17.0487	19.2655	13.2099	19.0662	14.8762	13.0404	0.452158	-0.580125	normal	0.760618	-0.23078	normal	0.935768	0.103468	normal	0.951376	-0.0579897	normal	--	--	Molecular Function: DNA binding (GO:0003677);; Cellular Component: nucleus (GO:0005634);; Biological Process: regulation of transcription, DNA-templated (GO:0006355);; Biological Process: pattern specification process (GO:0007389);; Biological Process: auxin-activated signaling pathway (GO:0009734);; Biological Process: abscisic acid-activated signaling pathway (GO:0009738);; Biological Process: …	--	--	--	Auxin response factor;; B3 DNA binding domain;; AUX/IAA family;; galactosyl transferase GMA12/MNN10 family	Auxin response factor 22 GN=OSJNBa0093B11.2 OS=Oryza sativa subsp. japonica (Rice) PE=2 SV=1	--	--	PREDICTED: auxin response factor 22-like isoform X1 [Setaria italica]	molecular function: binding (GO:0005488);; cellular component: cell (GO:0005623);; cellular component: organelle (GO:0043226);; cellular component: cell part (GO:0044464);; biological process: biological regulation (GO:0065007);; biological process: multicellular organismal process (GO:0032501);; biological process: developmental process (GO:0032502);; biological process: single-organism process …	--
BMK_Unigene_016044	BBR-BPC	TF	9.92123	3.54466	4.10983	7.61936	3.39355	5.0376	0.0838243	-1.07535	normal	0.44672	-0.759289	normal	0.323059	-0.837517	normal	0.789809	-0.187817	normal	--	--	Molecular Function: DNA binding (GO:0003677);; Molecular Function: sequence-specific DNA binding transcription factor activity (GO:0003700);; Cellular Component: nucleus (GO:0005634);; Biological Process: regulation of transcription, DNA-templated (GO:0006355);;	--	--	--	GAGA binding protein-like family	Barley B recombinant-like protein D OS=Oryza sativa subsp. japonica (Rice) PE=2 SV=1	K	Transcription	PREDICTED: barley B recombinant-like protein D-like isoform X1 [Setaria italica]	molecular function: binding (GO:0005488);; biological process: biological regulation (GO:0065007);; molecular function: nucleic acid binding transcription factor activity (GO:0001071);; cellular component: cell (GO:0005623);; cellular component: organelle (GO:0043226);; cellular component: cell part (GO:0044464)	--
BMK_Unigene_020608	BBR-BPC	TF	14.2706	13.2943	13.6578	13.4227	11.6027	13.473	0.613943	0.245595	normal	0.522902	0.443601	normal	0.983142	0.0365022	normal	0.528293	0.364063	normal	--	--	Molecular Function: sequence-specific DNA binding transcription factor activity (GO:0003700);; Cellular Component: nucleus (GO:0005634);; Biological Process: regulation of transcription, DNA-templated (GO:0006355);;	--	--	--	GAGA binding protein-like family	Protein Barley B recombinant GN=BBR OS=Hordeum vulgare (Barley) PE=1 SV=1	K	Transcription	PREDICTED: protein Barley B recombinant-like [Setaria italica]	biological process: biological regulation (GO:0065007);; molecular function: nucleic acid binding transcription factor activity (GO:0001071);; cellular component: cell (GO:0005623);; cellular component: organelle (GO:0043226);; cellular component: cell part (GO:0044464)	--
BMK_Unigene_087922	BBR-BPC	TF	6.10169	5.59533	3.0054	4.05569	4.77723	3.46044	0.774773	0.214905	normal	0.508455	-0.607097	normal	0.751897	0.444667	normal	0.916359	0.0940875	normal	--	--	Molecular Function: DNA binding (GO:0003677);; Molecular Function: sequence-specific DNA binding transcription factor activity (GO:0003700);; Cellular Component: nucleus (GO:0005634);; Biological Process: chromatin remodeling (GO:0006338);; Biological Process: regulation of transcription, DNA-templated (GO:0006355);;	--	--	--	GAGA binding protein-like family	Protein Barley B recombinant GN=BBR OS=Hordeum vulgare (Barley) PE=1 SV=1	--	--	PREDICTED: protein Barley B recombinant-like isoform X1 [Setaria italica]	molecular function: binding (GO:0005488);; biological process: biological regulation (GO:0065007);; molecular function: nucleic acid binding transcription factor activity (GO:0001071);; cellular component: cell (GO:0005623);; cellular component: organelle (GO:0043226);; cellular component: cell part (GO:0044464);; biological process: cellular process (GO:0009987);; biological process: cellular co…	--
BMK_Unigene_004117	BES1	TF	52.3243	31.7238	30.9451	79.7965	39.9358	50.5832	0.60326	-0.322535	normal	0.650012	-0.326549	normal	0.360213	-0.618546	normal	0.699326	-0.18123	normal	--	--	Biological Process: regulation of transcription, DNA-templated (GO:0006355);;	--	--	--	Plant protein of unknown function (DUF822)	Protein BZR1 homolog 3 GN=P0427B07.9 OS=Oryza sativa subsp. japonica (Rice) PE=2 SV=1	S	Function unknown	hypothetical protein SORBIDRAFT_10g021750 [Sorghum bicolor]	biological process: biological regulation (GO:0065007)	--
BMK_Unigene_011162	BES1	TF	16.5175	10.6029	14.8009	18.5459	14.4937	14.9008	0.613943	-0.264036	normal	0.650012	0.334052	normal	0.967463	-0.0607621	normal	0.935773	0.0681285	normal	--	--	Biological Process: polysaccharide catabolic process (GO:0000272);; Molecular Function: sequence-specific DNA binding transcription factor activity (GO:0003700);; Cellular Component: nucleus (GO:0005634);; Biological Process: regulation of transcription, DNA-templated (GO:0006355);; Cellular Component: chloroplast (GO:0009507);; Biological Process: vernalization response (GO:0010048);; Molecular …	K01177|0|bdi:100824427|beta-amylase 2, chloroplastic-like; K01177 beta-amylase [EC:3.2.1.2] (A)	--	--	Glycosyl hydrolase family 14;; Plant protein of unknown function (DUF822);; Glycosyl hydrolase family 14	Beta-amylase 7 GN=F4I18.14 OS=Arabidopsis thaliana (Mouse-ear cress) PE=2 SV=2	G	Carbohydrate transport and metabolism	TPA: hypothetical protein ZEAMMB73_150352 [Zea mays]	biological process: metabolic process (GO:0008152);; biological process: biological regulation (GO:0065007);; molecular function: nucleic acid binding transcription factor activity (GO:0001071);; cellular component: cell (GO:0005623);; cellular component: organelle (GO:0043226);; cellular component: cell part (GO:0044464);; biological process: response to stimulus (GO:0050896);; molecular functio…	Starch and sucrose metabolism (ko00500)
BMK_Unigene_046817	BES1	TF	37.8168	30.1328	31.1882	56.5919	39.4576	42.1305	0.742084	0.167891	normal	0.668458	0.28609	normal	0.983651	0.0355204	normal	0.741749	0.183782	normal	--	--	--	--	--	--	Plant protein of unknown function (DUF822)	Protein BZR1 homolog 2 GN=P0489A05.32 OS=Oryza sativa subsp. japonica (Rice) PE=2 SV=1	--	--	PREDICTED: BES1/BZR1 homolog protein 4-like [Setaria italica]	--	--
BMK_Unigene_051598	BES1	TF	11.0546	4.76437	4.32328	11.771	5.93853	6.81008	0.278455	-1.25148	normal	0.14475	-1.41476	normal	0.841656	-0.286977	normal	0.969303	0.0642048	normal	--	--	Biological Process: polysaccharide catabolic process (GO:0000272);; Molecular Function: sequence-specific DNA binding transcription factor activity (GO:0003700);; Cellular Component: nucleus (GO:0005634);; Biological Process: regulation of transcription, DNA-templated (GO:0006355);; Molecular Function: beta-amylase activity (GO:0016161);; Molecular Function: cation binding (GO:0043169);; Biologic…	K01177|0|sita:101753020|beta-amylase 8-like; K01177 beta-amylase [EC:3.2.1.2] (A)	--	--	Plant protein of unknown function (DUF822);; Glycosyl hydrolase family 14;; Glycosyl hydrolase family 14	Beta-amylase 8 GN=K9E15.8 OS=Arabidopsis thaliana (Mouse-ear cress) PE=2 SV=1	--	--	PREDICTED: beta-amylase 8-like, partial [Setaria italica]	biological process: metabolic process (GO:0008152);; biological process: biological regulation (GO:0065007);; molecular function: nucleic acid binding transcription factor activity (GO:0001071);; cellular component: cell (GO:0005623);; cellular component: organelle (GO:0043226);; cellular component: cell part (GO:0044464);; molecular function: catalytic activity (GO:0003824);; molecular function:…	Starch and sucrose metabolism (ko00500)
BMK_Unigene_093462	BES1	TF	3.3294	1.97836	2.53714	12.3924	1.82922	2.17298	0.93251	-0.305882	normal	0.986919	-0.0530555	normal	0.555269	-1.7529	normal	0.586841	-1.23601	normal	--	--	Biological Process: polysaccharide catabolic process (GO:0000272);; Molecular Function: sequence-specific DNA binding transcription factor activity (GO:0003700);; Cellular Component: nucleus (GO:0005634);; Biological Process: regulation of transcription, DNA-templated (GO:0006355);; Molecular Function: beta-amylase activity (GO:0016161);; Molecular Function: cation binding (GO:0043169);; Biologic…	--	--	--	Plant protein of unknown function (DUF822)	Beta-amylase 8 GN=K9E15.8 OS=Arabidopsis thaliana (Mouse-ear cress) PE=2 SV=1	R	General function prediction only	hypothetical protein SORBIDRAFT_04g002450 [Sorghum bicolor]	biological process: metabolic process (GO:0008152);; biological process: biological regulation (GO:0065007);; molecular function: nucleic acid binding transcription factor activity (GO:0001071);; cellular component: cell (GO:0005623);; cellular component: organelle (GO:0043226);; cellular component: cell part (GO:0044464);; molecular function: catalytic activity (GO:0003824);; molecular function:…	--
BMK_Unigene_000617	bHLH	TF	6.28451	3.79748	2.13875	3.82813	1.24115	1.74519	0.767305	-0.288093	normal	0.315204	-1.07269	normal	0.355788	-1.27005	normal	0.719975	-0.530024	normal	--	--	Molecular Function: DNA binding (GO:0003677);; Cellular Component: nucleus (GO:0005634);; Cellular Component: mitochondrion (GO:0005739);; Cellular Component: plastid (GO:0009536);; Molecular Function: protein dimerization activity (GO:0046983);;	--	--	--	Helix-loop-helix DNA-binding domain	Transcription factor APG OS=Oryza sativa subsp. japonica (Rice) PE=1 SV=1	K	Transcription	PREDICTED: transcription factor PIF3-like [Setaria italica]	molecular function: binding (GO:0005488);; cellular component: cell (GO:0005623);; cellular component: organelle (GO:0043226);; cellular component: cell part (GO:0044464)	--
BMK_Unigene_000666	bHLH	TF	1.17393	1.10812	0.735289	0.361122	0.819577	0.186237	0.963242	0.0816191	normal	0.753435	-0.452539	normal	0.791702	0.725068	normal	0.811462	-0.524339	normal	--	--	Molecular Function: nucleic acid binding (GO:0003676);; Cellular Component: nucleus (GO:0005634);; Biological Process: macromolecule metabolic process (GO:0043170);; Biological Process: primary metabolic process (GO:0044238);;	--	--	--	Helix-loop-helix DNA-binding domain;; zinc-binding in reverse transcriptase	Transcription factor TIP2 GN=P0706B05.43 OS=Oryza sativa subsp. japonica (Rice) PE=1 SV=1	K	Transcription	PREDICTED: transcription factor bHLH91-like [Setaria italica]	molecular function: binding (GO:0005488);; cellular component: cell (GO:0005623);; cellular component: organelle (GO:0043226);; cellular component: cell part (GO:0044464);; biological process: metabolic process (GO:0008152)	--
BMK_Unigene_002044	bHLH	TF	1.2247	1.00393	0.810614	5.10956	2.69967	1.9067	0.959414	0.077834	normal	0.967555	-0.059003	normal	0.751897	-0.591545	normal	0.142781	-1.01591	normal	--	--	Cellular Component: nucleus (GO:0005634);; Molecular Function: protein dimerization activity (GO:0046983);;	--	--	--	Helix-loop-helix DNA-binding domain	Transcription factor bHLH30 OS=Arabidopsis thaliana (Mouse-ear cress) PE=1 SV=1	K	Transcription	PREDICTED: transcription factor bHLH30-like [Setaria italica]	cellular component: cell (GO:0005623);; cellular component: organelle (GO:0043226);; cellular component: cell part (GO:0044464);; molecular function: binding (GO:0005488)	--
BMK_Unigene_002346	bHLH	TF	0.36834	0.799012	0.744094	0.524429	1.00047	0.494733	0.869832	0.54008	normal	0.816361	0.753913	normal	0.751897	-0.72772	normal	0.67411	1.3091	normal	--	--	Cellular Component: nucleus (GO:0005634);; Molecular Function: protein dimerization activity (GO:0046983);;	--	--	--	Helix-loop-helix DNA-binding domain	Transcription factor bHLH84 GN=BHLH84 OS=Arabidopsis thaliana (Mouse-ear cress) PE=2 SV=1	K	Transcription	PREDICTED: transcription factor bHLH84-like [Setaria italica]	cellular component: cell (GO:0005623);; cellular component: organelle (GO:0043226);; cellular component: cell part (GO:0044464);; molecular function: binding (GO:0005488)	--
BMK_Unigene_002356	bHLH	TF	3.5722	0.0925595	0.120746	1.73904	0	0.259503	5.85746e-05	-4.45332	down	0.000222516	-3.98323	down	0.00335918	-4.38157	down	0.239869	-1.90974	normal	--	--	Molecular Function: protein dimerization activity (GO:0046983);;	--	--	--	Helix-loop-helix DNA-binding domain	Transcription factor bHLH96 GN=T9N14.4 OS=Arabidopsis thaliana (Mouse-ear cress) PE=2 SV=1	K	Transcription	PREDICTED: transcription factor bHLH96-like [Setaria italica]	molecular function: binding (GO:0005488)	--
BMK_Unigene_002700	bHLH	TF	56.8862	82.0148	70.1237	64.232	82.1095	65.9139	0.000269419	1.45255	up	0.00732741	1.49301	up	0.685833	0.473663	normal	0.654026	0.297018	normal	--	--	Molecular Function: DNA binding (GO:0003677);; Cellular Component: nucleus (GO:0005634);; Cellular Component: plastid (GO:0009536);; Molecular Function: protein dimerization activity (GO:0046983);;	--	--	--	Helix-loop-helix DNA-binding domain;; Domain of unknown function (DUF3511)	Transcription factor ILR3 GN=K5F14.2 OS=Arabidopsis thaliana (Mouse-ear cress) PE=1 SV=1	--	--	PREDICTED: transcription factor ILR3-like [Setaria italica]	molecular function: binding (GO:0005488);; cellular component: cell (GO:0005623);; cellular component: organelle (GO:0043226);; cellular component: cell part (GO:0044464)	--
BMK_Unigene_002718	bHLH	TF	87.2395	72.7181	72.9122	93.0743	85.1356	55.0942	0.844632	0.111698	normal	0.65547	0.267754	normal	0.904509	0.134906	normal	0.55869	-0.383158	normal	--	--	Cellular Component: nucleus (GO:0005634);; Molecular Function: protein dimerization activity (GO:0046983);;	K13422|0|zma:541694|myc7; myc transcription factor7; K13422 transcription factor MYC2 (A)	--	--	bHLH-MYC and R2R3-MYB transcription factors N-terminal;; Helix-loop-helix DNA-binding domain	Transcription factor MYC4 GN=T6K21.60 OS=Arabidopsis thaliana (Mouse-ear cress) PE=1 SV=1	--	--	PREDICTED: transcription factor MYC4 [Zea mays]	cellular component: cell (GO:0005623);; cellular component: organelle (GO:0043226);; cellular component: cell part (GO:0044464);; molecular function: binding (GO:0005488)	Plant hormone signal transduction (ko04075)
BMK_Unigene_002803	bHLH	TF	2.83319	23.5709	1.16136	11.654	13.9921	0.820065	3.53839e-09	3.50954	up	0.951811	0.151181	normal	0.972405	-0.158325	normal	0.140559	-2.7087	normal	--	--	Molecular Function: binding (GO:0005488);; Cellular Component: nucleus (GO:0005634);;	--	--	--	Helix-loop-helix DNA-binding domain	Transcription factor bHLH35 GN=MUL3.10 OS=Arabidopsis thaliana (Mouse-ear cress) PE=2 SV=1	--	--	PREDICTED: transcription factor bHLH35-like isoform X1 [Setaria italica]	molecular function: binding (GO:0005488);; cellular component: cell (GO:0005623);; cellular component: organelle (GO:0043226);; cellular component: cell part (GO:0044464)	--
BMK_Unigene_002843	bHLH	TF	51.7064	38.4132	45.0994	39.5725	43.4915	43.5653	0.980713	0.0135323	normal	0.650012	0.292338	normal	0.469511	0.529069	normal	0.136709	0.601387	normal	--	--	Molecular Function: protein dimerization activity (GO:0046983);;	--	--	--	Helix-loop-helix DNA-binding domain	Transcription factor ILR3 GN=K5F14.2 OS=Arabidopsis thaliana (Mouse-ear cress) PE=1 SV=1	--	--	PREDICTED: transcription factor ILR3-like isoform X1 [Setaria italica]	molecular function: binding (GO:0005488)	--
BMK_Unigene_003296	bHLH	TF	0.0739264	0.196303	1.0683	0.542329	0.545665	1.52266	0.644096	0.98241	normal	0.0122058	3.40796	normal	0.965165	0.173882	normal	0.361549	1.40688	normal	--	--	Molecular Function: DNA binding (GO:0003677);; Cellular Component: nucleus (GO:0005634);; Biological Process: regulation of transcription, DNA-templated (GO:0006355);; Molecular Function: protein dimerization activity (GO:0046983);;	--	--	--	Helix-loop-helix DNA-binding domain	Transcription factor APG OS=Oryza sativa subsp. japonica (Rice) PE=1 SV=1	K	Transcription	PREDICTED: transcription factor PIF1-like [Setaria italica]	molecular function: binding (GO:0005488);; cellular component: cell (GO:0005623);; cellular component: organelle (GO:0043226);; cellular component: cell part (GO:0044464);; biological process: biological regulation (GO:0065007)	--
BMK_Unigene_004167	bHLH	TF	0.826053	4.85135	0.932088	0.0286799	0.905677	0.00945641	0.000478785	2.81332	up	0.65547	0.716795	normal	0.0938512	3.1463	normal	0.896373	-0.362333	normal	--	--	Biological Process: mycelium development (GO:0043581);;	--	[K]	Transcription	Helix-loop-helix DNA-binding domain	--	K	Transcription	hypothetical protein GGTG_00126 [Gaeumannomyces graminis var. tritici R3-111a-1]	biological process: multicellular organismal process (GO:0032501);; biological process: developmental process (GO:0032502);; biological process: single-organism process (GO:0044699)	--
BMK_Unigene_004608	bHLH	TF	4.75059	3.95615	3.74401	5.70967	4.2578	4.38781	0.872747	0.112103	normal	0.822754	0.169664	normal	0.901381	-0.161174	normal	0.98514	-0.0142124	normal	--	--	Molecular Function: protein dimerization activity (GO:0046983);;	--	--	--	bHLH-MYC and R2R3-MYB transcription factors N-terminal;; Helix-loop-helix DNA-binding domain	Transcription factor bHLH13 GN=F6F3.7 OS=Arabidopsis thaliana (Mouse-ear cress) PE=2 SV=1	--	--	PREDICTED: transcription factor bHLH13-like [Setaria italica]	molecular function: binding (GO:0005488)	--
BMK_Unigene_004807	bHLH	TF	13.22	33.1371	23.159	8.62183	13.0198	14.0836	3.14895e-06	1.68361	up	0.031617	1.32913	normal	0.666454	0.789757	normal	0.168989	1.01661	normal	--	--	Cellular Component: plastid (GO:0009536);; Molecular Function: protein dimerization activity (GO:0046983);;	--	--	--	Helix-loop-helix DNA-binding domain	Transcription factor bHLH49 GN=T6L1.10 OS=Arabidopsis thaliana (Mouse-ear cress) PE=1 SV=1	--	--	PREDICTED: transcription factor bHLH78-like [Setaria italica]	cellular component: cell (GO:0005623);; cellular component: organelle (GO:0043226);; cellular component: cell part (GO:0044464);; molecular function: binding (GO:0005488)	--
BMK_Unigene_005462	bHLH	TF	16.1018	14.4338	12.8361	20.7331	16.3177	15.0269	0.668373	0.21519	normal	0.76851	0.185568	normal	0.955075	-0.0694568	normal	0.895967	-0.0895413	normal	--	--	Molecular Function: protein dimerization activity (GO:0046983);;	--	--	--	bHLH-MYC and R2R3-MYB transcription factors N-terminal;; Helix-loop-helix DNA-binding domain	Transcription factor bHLH13 GN=F6F3.7 OS=Arabidopsis thaliana (Mouse-ear cress) PE=2 SV=1	K	Transcription	PREDICTED: transcription factor bHLH13-like isoform X1 [Setaria italica]	molecular function: binding (GO:0005488)	--
BMK_Unigene_005930	bHLH	TF	22.0384	24.9667	14.0901	22.9905	24.1378	15.3733	0.377775	0.547317	normal	0.876918	-0.145739	normal	0.751897	0.347388	normal	0.767915	-0.194644	normal	--	--	Molecular Function: protein dimerization activity (GO:0046983);;	--	--	--	Helix-loop-helix DNA-binding domain	Transcription factor bHLH130 GN=T24P15.19 OS=Arabidopsis thaliana (Mouse-ear cress) PE=1 SV=1	--	--	PREDICTED: transcription factor bHLH130-like isoform X5 [Setaria italica]	molecular function: binding (GO:0005488)	--
BMK_Unigene_007106	bHLH	TF	5.59098	1.1462	1.20734	6.39963	2.44304	2.60562	0.010701	-1.8518	normal	0.0662311	-1.63104	normal	0.214716	-1.05497	normal	0.241587	-0.873734	normal	--	--	Cellular Component: nucleus (GO:0005634);; Molecular Function: protein dimerization activity (GO:0046983);;	--	--	--	Helix-loop-helix DNA-binding domain	Transcription factor bHLH79 GN=MRG21.2 OS=Arabidopsis thaliana (Mouse-ear cress) PE=2 SV=1	K	Transcription	PREDICTED: transcription factor bHLH79-like [Setaria italica]	cellular component: cell (GO:0005623);; cellular component: organelle (GO:0043226);; cellular component: cell part (GO:0044464);; molecular function: binding (GO:0005488)	--
BMK_Unigene_008267	bHLH	TF	10.5291	1.60757	1.28225	6.33883	1.09889	2.07222	0.000127712	-2.16036	down	2.00322e-06	-2.47991	down	0.0295881	-2.13592	normal	0.315247	-1.21923	normal	--	--	Molecular Function: binding (GO:0005488);;	--	--	--	Helix-loop-helix DNA-binding domain	Transcription factor bHLH62 GN=F21O3.5 OS=Arabidopsis thaliana (Mouse-ear cress) PE=2 SV=1	K	Transcription	PREDICTED: LOW QUALITY PROTEIN: transcription factor bHLH62-like [Setaria italica]	molecular function: binding (GO:0005488)	--
BMK_Unigene_008367	bHLH	TF	0.5291	2.47275	9.08748	0.54592	3.38308	5.79947	0.00451848	2.47171	up	4.66507e-11	4.46685	up	0.0127272	2.607	normal	5.31379e-08	3.58232	up	--	--	--	--	--	--	Helix-loop-helix DNA-binding domain	--	S	Function unknown	PREDICTED: uncharacterized protein LOC103642328 [Zea mays]	--	--
BMK_Unigene_008622	bHLH	TF	5.82624	0.694811	0.658929	4.19427	1.39233	1.63653	8.24177e-05	-2.79809	down	0.00376315	-2.61844	down	0.689451	-1.14448	normal	0.328515	-1.1847	normal	--	--	Cellular Component: nucleus (GO:0005634);; Cellular Component: plastid (GO:0009536);; Molecular Function: protein dimerization activity (GO:0046983);;	--	--	--	Helix-loop-helix DNA-binding domain	Transcription factor bHLH49 GN=T6L1.10 OS=Arabidopsis thaliana (Mouse-ear cress) PE=1 SV=1	--	--	PREDICTED: transcription factor bHLH49-like [Setaria italica]	cellular component: cell (GO:0005623);; cellular component: organelle (GO:0043226);; cellular component: cell part (GO:0044464);; molecular function: binding (GO:0005488)	--
BMK_Unigene_008813	bHLH	TF	4.2324	0.0683276	0.151211	0.198116	0	0.162865	0.000145507	-5.44874	down	0.00240904	-4.24912	down	0.49349	-2.07335	normal	0.829315	-0.595079	normal	--	--	--	--	--	--	Helix-loop-helix DNA-binding domain	Transcription factor bHLH35 GN=MUL3.10 OS=Arabidopsis thaliana (Mouse-ear cress) PE=2 SV=1	--	--	PREDICTED: transcription factor bHLH35-like isoform X1 [Setaria italica]	--	--
BMK_Unigene_009307	bHLH	TF	8.03197	48.7825	34.3883	20.2087	33.8419	68.3132	1.21231e-10	3.28334	up	5.94236e-05	2.47116	up	0.751897	0.66193	normal	0.0046381	1.85708	up	--	--	Molecular Function: DNA binding (GO:0003677);; Molecular Function: protein dimerization activity (GO:0046983);;	--	--	--	Helix-loop-helix DNA-binding domain;; zinc-binding in reverse transcriptase	Transcription factor bHLH130 GN=T24P15.19 OS=Arabidopsis thaliana (Mouse-ear cress) PE=1 SV=1	K	Transcription	PREDICTED: transcription factor bHLH130-like isoform X2 [Setaria italica]	molecular function: binding (GO:0005488)	--
BMK_Unigene_011207	bHLH	TF	0.176725	15.1791	0.433491	0.0385232	0.164288	0.429066	1.08045e-15	6.44126	up	0.63683	1.43003	normal	0.751897	1.3907	normal	0.182747	2.51224	normal	--	--	--	--	--	--	Helix-loop-helix DNA-binding domain	--	S	Function unknown	hypothetical protein BN14_02322 [Rhizoctonia solani AG-1 IB]	--	--
BMK_Unigene_011309	bHLH	TF	23.1676	3.25143	1.95474	24.687	6.56138	3.9492	7.59237e-07	-2.48388	down	2.00064e-08	-2.98372	down	0.0028573	-1.75387	down	5.70361e-09	-2.38088	down	--	--	Cellular Component: nucleus (GO:0005634);; Biological Process: double fertilization forming a zygote and endosperm (GO:0009567);; Molecular Function: protein dimerization activity (GO:0046983);;	--	--	--	Helix-loop-helix DNA-binding domain;; Transposase-associated domain	Transcription factor UNE12 GN=T10P11.13 OS=Arabidopsis thaliana (Mouse-ear cress) PE=2 SV=2	K	Transcription	PREDICTED: transcription factor UNE12-like [Setaria italica]	cellular component: cell (GO:0005623);; cellular component: organelle (GO:0043226);; cellular component: cell part (GO:0044464);; biological process: reproduction (GO:0000003);; biological process: reproductive process (GO:0022414);; biological process: single-organism process (GO:0044699);; biological process: multi-organism process (GO:0051704);; molecular function: binding (GO:0005488)	--
BMK_Unigene_011790	bHLH	TF	0.431866	0.743235	0.806185	0.133268	0.101873	0.969842	0.60326	1.02651	normal	0.524355	1.28757	normal	0.989392	-0.053096	normal	0.0773008	2.56979	normal	--	--	Molecular Function: DNA binding (GO:0003677);; Molecular Function: sequence-specific DNA binding transcription factor activity (GO:0003700);; Cellular Component: nucleus (GO:0005634);; Biological Process: regulation of transcription, DNA-templated (GO:0006355);; Biological Process: pollen development (GO:0009555);; Molecular Function: protein dimerization activity (GO:0046983);; Biological Proces…	--	--	--	Helix-loop-helix DNA-binding domain	Transcription factor ABORTED MICROSPORES GN=F12A24.9 OS=Arabidopsis thaliana (Mouse-ear cress) PE=1 SV=2	K	Transcription	hypothetical protein SORBIDRAFT_04g001650 [Sorghum bicolor]	molecular function: binding (GO:0005488);; biological process: biological regulation (GO:0065007);; molecular function: nucleic acid binding transcription factor activity (GO:0001071);; cellular component: cell (GO:0005623);; cellular component: organelle (GO:0043226);; cellular component: cell part (GO:0044464);; biological process: multicellular organismal process (GO:0032501);; biological proc…	--
BMK_Unigene_012143	bHLH	TF	2.88697	1.08944	1.79133	2.95424	1.90343	1.3211	0.378436	-0.967581	normal	0.761249	-0.320042	normal	0.910059	-0.202598	normal	0.719383	-0.319746	normal	--	--	Cellular Component: nucleus (GO:0005634);; Cellular Component: mitochondrion (GO:0005739);; Cellular Component: plastid (GO:0009536);; Molecular Function: protein dimerization activity (GO:0046983);;	K12126|0|sita:101757582|transcription factor PIF3-like; K12126 phytochrome-interacting factor 3 (A)	--	--	Helix-loop-helix DNA-binding domain	Transcription factor APG OS=Oryza sativa subsp. japonica (Rice) PE=1 SV=1	K	Transcription	PREDICTED: transcription factor PIF3-like isoform X1 [Setaria italica]	cellular component: cell (GO:0005623);; cellular component: organelle (GO:0043226);; cellular component: cell part (GO:0044464);; molecular function: binding (GO:0005488)	Plant hormone signal transduction (ko04075);; Circadian rhythm - plant (ko04712)
BMK_Unigene_012327	bHLH	TF	3.08195	0	0	0.749199	0	0	8.40187e-05	-6.38034	down	0.00022201	-6.08982	down	0.188753	-2.88365	normal	0.0645467	-3.27837	normal	--	--	Molecular Function: glyceraldehyde-3-phosphate dehydrogenase (NAD+) (phosphorylating) activity (GO:0004365);; Molecular Function: binding (GO:0005488);; Biological Process: glycolytic process (GO:0006096);; Cellular Component: cytoplasmic membrane-bounded vesicle (GO:0016023);;	--	--	--	Helix-loop-helix DNA-binding domain	Transcription factor TT8 GN=F17A8.170 OS=Arabidopsis thaliana (Mouse-ear cress) PE=1 SV=2	R	General function prediction only	PREDICTED: transcription factor bHLH18-like [Setaria italica]	biological process: metabolic process (GO:0008152);; biological process: single-organism process (GO:0044699);; molecular function: catalytic activity (GO:0003824);; molecular function: binding (GO:0005488);; biological process: cellular process (GO:0009987);; cellular component: cell (GO:0005623);; cellular component: organelle (GO:0043226);; cellular component: cell part (GO:0044464)	--
BMK_Unigene_012491	bHLH	TF	0.978393	0	0	1.37485	1.3151	2.13816	0.0462525	-4.23437	normal	0.0790357	-3.94503	normal	0.964837	0.186002	normal	0.517589	0.923415	normal	--	--	Molecular Function: protein dimerization activity (GO:0046983);;	--	[K]	Transcription	Helix-loop-helix DNA-binding domain	--	S	Function unknown	hypothetical protein COCSADRAFT_35828 [Bipolaris sorokiniana ND90Pr]	molecular function: binding (GO:0005488)	--
BMK_Unigene_013394	bHLH	TF	6.06995	8.2362	18.8138	2.49557	7.5161	7.63021	0.112019	0.806403	normal	1.15034e-07	2.12974	up	0.000415323	1.80143	up	3.91927e-07	1.95413	up	--	--	Cellular Component: nucleus (GO:0005634);;	--	--	--	Helix-loop-helix DNA-binding domain	Transcription factor bHLH49 GN=T6L1.10 OS=Arabidopsis thaliana (Mouse-ear cress) PE=1 SV=1	R	General function prediction only	PREDICTED: transcription factor bHLH49-like [Setaria italica]	cellular component: cell (GO:0005623);; cellular component: organelle (GO:0043226);; cellular component: cell part (GO:0044464)	--
BMK_Unigene_013575	bHLH	TF	0.347164	9.15468	0.137037	0	1.33723	0	0.00711204	4.22779	up	0.8211	-0.615539	normal	0.00437832	4.4415	up	--	--	--	--	--	--	--	--	--	Helix-loop-helix DNA-binding domain	--	--	--	--	--	--
BMK_Unigene_014411	bHLH	TF	3.14095	5.10713	1.20209	12.5419	7.28492	2.53322	0.360061	0.87161	normal	0.267995	-1.0615	normal	0.851555	-0.460799	normal	0.229921	-1.73858	normal	--	--	Cellular Component: nucleus (GO:0005634);; Molecular Function: protein dimerization activity (GO:0046983);;	--	--	--	Helix-loop-helix DNA-binding domain	Transcription factor bHLH92 GN=K9D7.15 OS=Arabidopsis thaliana (Mouse-ear cress) PE=2 SV=1	K	Transcription	PREDICTED: uncharacterized protein LOC101753784 isoform X1 [Setaria italica]	cellular component: cell (GO:0005623);; cellular component: organelle (GO:0043226);; cellular component: cell part (GO:0044464);; molecular function: binding (GO:0005488)	--
BMK_Unigene_014641	bHLH	TF	0.420697	0	0	0.735616	1.11554	1.91335	0.102999	-3.71999	normal	0.141257	-3.52836	normal	0.766515	0.710259	normal	0.090634	1.62996	normal	--	--	Molecular Function: protein dimerization activity (GO:0046983);;	--	[K]	Transcription	Helix-loop-helix DNA-binding domain	--	--	--	hypothetical protein COCSADRAFT_259169 [Bipolaris sorokiniana ND90Pr]	molecular function: binding (GO:0005488)	--
BMK_Unigene_014853	bHLH	TF	4.04616	6.28966	3.71916	3.48732	5.45896	4.82335	0.0638152	1.22778	normal	0.65547	0.433941	normal	0.705477	0.822131	normal	0.699326	0.513076	normal	--	--	Molecular Function: DNA binding (GO:0003677);; Cellular Component: nucleus (GO:0005634);; Biological Process: regulation of transcription, DNA-templated (GO:0006355);; Molecular Function: protein dimerization activity (GO:0046983);;	--	--	--	Helix-loop-helix DNA-binding domain	Transcription factor SPATULA OS=Arabidopsis thaliana (Mouse-ear cress) PE=1 SV=1	K	Transcription	hypothetical protein SORBIDRAFT_10g004500 [Sorghum bicolor]	molecular function: binding (GO:0005488);; cellular component: cell (GO:0005623);; cellular component: organelle (GO:0043226);; cellular component: cell part (GO:0044464);; biological process: biological regulation (GO:0065007)	--
BMK_Unigene_015053	bHLH	TF	114.171	81.4519	96.8711	135.938	97.651	62.9046	0.62928	0.234509	normal	0.206091	0.810274	normal	0.762804	-0.249154	normal	0.202536	-0.562515	normal	--	--	Molecular Function: binding (GO:0005488);; Cellular Component: nucleus (GO:0005634);;	--	--	--	Helix-loop-helix DNA-binding domain	Transcription factor bHLH101 GN=F21E1.70 OS=Arabidopsis thaliana (Mouse-ear cress) PE=2 SV=1	K	Transcription	PREDICTED: transcription factor ORG3-like isoform X1 [Setaria italica]	molecular function: binding (GO:0005488);; cellular component: cell (GO:0005623);; cellular component: organelle (GO:0043226);; cellular component: cell part (GO:0044464)	--
BMK_Unigene_015183	bHLH	TF	10.6012	6.13096	7.03114	12.7556	11.9601	20.5114	0.31613	-0.641332	normal	0.767769	-0.230544	normal	0.982423	0.0567	normal	0.178663	0.903309	normal	[F]	Nucleotide transport and metabolism	Molecular Function: monooxygenase activity (GO:0004497);; Molecular Function: iron ion binding (GO:0005506);; Molecular Function: electron carrier activity (GO:0009055);; Cellular Component: cytoplasmic membrane-bounded vesicle (GO:0016023);; Molecular Function: oxidoreductase activity, acting on paired donors, with incorporation or reduction of molecular oxygen (GO:0016705);; Molecular Function:…	--	[QI]	--	Helix-loop-helix DNA-binding domain;; Cytochrome P450;; Late embryogenesis abundant protein;; Orotidine 5'-phosphate decarboxylase / HUMPS family	Cytochrome P450 94A1 GN=CYP94A1 OS=Vicia sativa (Spring vetch) PE=2 SV=2	R	General function prediction only	PREDICTED: uncharacterized protein LOC101783147 isoform X2 [Setaria italica]	biological process: metabolic process (GO:0008152);; biological process: single-organism process (GO:0044699);; molecular function: catalytic activity (GO:0003824);; molecular function: binding (GO:0005488);; molecular function: electron carrier activity (GO:0009055);; cellular component: cell (GO:0005623);; cellular component: organelle (GO:0043226);; cellular component: cell part (GO:0044464)	--
BMK_Unigene_016187	bHLH	TF	10.0132	5.20379	4.83549	3.68596	5.25224	1.96904	0.531605	-0.555072	normal	0.650012	-0.49428	normal	0.746537	0.774462	normal	0.699326	-0.463849	normal	--	--	Molecular Function: protein dimerization activity (GO:0046983);;	--	--	--	Helix-loop-helix DNA-binding domain	Transcription factor bHLH93 GN=K21L13.16 OS=Arabidopsis thaliana (Mouse-ear cress) PE=1 SV=1	K	Transcription	PREDICTED: transcription factor bHLH93-like isoform X2 [Setaria italica]	molecular function: binding (GO:0005488)	--
BMK_Unigene_016212	bHLH	TF	6.00751	4.19028	2.79218	5.3872	5.81023	2.49776	0.875036	-0.143793	normal	0.577046	-0.574365	normal	0.864973	0.330786	normal	0.552912	-0.731148	normal	--	--	Cellular Component: nucleus (GO:0005634);; Molecular Function: protein dimerization activity (GO:0046983);;	--	[K]	Transcription	Helix-loop-helix DNA-binding domain	Transcription factor bHLH106 GN=T3K9.10 OS=Arabidopsis thaliana (Mouse-ear cress) PE=2 SV=1	K	Transcription	PREDICTED: transcription factor bHLH106-like [Setaria italica]	cellular component: cell (GO:0005623);; cellular component: organelle (GO:0043226);; cellular component: cell part (GO:0044464);; molecular function: binding (GO:0005488)	--
BMK_Unigene_017519	bHLH	TF	4.44025	5.9984	3.94335	4.78792	7.25409	7.85928	0.557238	0.847868	normal	0.776622	0.442979	normal	0.651902	0.83203	normal	0.0777001	1.34317	normal	--	--	Molecular Function: DNA binding (GO:0003677);; Cellular Component: nucleus (GO:0005634);; Biological Process: regulation of transcription, DNA-templated (GO:0006355);; Molecular Function: protein dimerization activity (GO:0046983);;	--	--	--	Helix-loop-helix DNA-binding domain	Transcription factor SPATULA OS=Arabidopsis thaliana (Mouse-ear cress) PE=1 SV=1	K	Transcription	hypothetical protein SORBIDRAFT_10g004500 [Sorghum bicolor]	molecular function: binding (GO:0005488);; cellular component: cell (GO:0005623);; cellular component: organelle (GO:0043226);; cellular component: cell part (GO:0044464);; biological process: biological regulation (GO:0065007)	--
BMK_Unigene_018292	bHLH	TF	1.04706	2.39545	0.449598	0	0.667588	0	0.60326	1.24848	normal	0.909004	-0.409834	normal	0.0118197	4.12619	normal	--	--	--	--	--	Molecular Function: binding (GO:0005488);;	--	[K]	Transcription	Domain of unknown function (DUF2014);; Helix-loop-helix DNA-binding domain	--	K	Transcription	putative sterol regulatory element binding protein sre1 protein [Togninia minima UCRPA7]	molecular function: binding (GO:0005488)	--
BMK_Unigene_020059	bHLH	TF	78.6035	125.719	154.196	38.6189	85.9806	59.7339	0.00705753	1.13369	up	0.00128316	1.58138	up	0.0950701	1.41325	normal	0.0396723	1.0145	normal	--	--	Cellular Component: photosystem I (GO:0009522);; Cellular Component: photosystem II (GO:0009523);; Cellular Component: chloroplast thylakoid membrane (GO:0009535);; Biological Process: photosynthesis, light harvesting (GO:0009765);; Cellular Component: integral component of membrane (GO:0016021);; Molecular Function: chlorophyll binding (GO:0016168);; Biological Process: protein-chromophore linka…	--	--	--	Helix-loop-helix DNA-binding domain;; Chlorophyll A-B binding protein;; Universal stress protein family	Chlorophyll a-b binding protein 151, chloroplastic (Precursor) GN=CAB-151 OS=Gossypium hirsutum (Upland cotton) PE=2 SV=2	K	Transcription	hypothetical protein SORBIDRAFT_03g043690 [Sorghum bicolor]	cellular component: cell (GO:0005623);; cellular component: membrane (GO:0016020);; cellular component: macromolecular complex (GO:0032991);; cellular component: membrane part (GO:0044425);; cellular component: cell part (GO:0044464);; cellular component: organelle (GO:0043226);; cellular component: organelle part (GO:0044422);; biological process: metabolic process (GO:0008152);; biological proc…	--
BMK_Unigene_021896	bHLH	TF	0	0.11351	0	0	0	0.105524	--	--	--	--	--	--	--	--	--	--	--	--	--	--	Molecular Function: protein dimerization activity (GO:0046983);;	--	[K]	Transcription	Helix-loop-helix DNA-binding domain	--	K	Transcription	hypothetical protein SAPIO_CDS8205 [Scedosporium apiospermum]	molecular function: binding (GO:0005488)	--
BMK_Unigene_031239	bHLH	TF	0.541791	1.0761	1.12335	0.68694	1.87732	0.533634	--	--	--	0.475976	2.314	normal	--	--	--	--	--	--	--	--	Cellular Component: nucleus (GO:0005634);;	--	--	--	Helix-loop-helix DNA-binding domain	Transcription factor bHLH84 GN=BHLH84 OS=Arabidopsis thaliana (Mouse-ear cress) PE=2 SV=1	K	Transcription	PREDICTED: transcription factor bHLH84-like [Setaria italica]	cellular component: cell (GO:0005623);; cellular component: organelle (GO:0043226);; cellular component: cell part (GO:0044464)	--
BMK_Unigene_034248	bHLH	TF	0.795137	0.0376243	0.613014	0.358304	0.391476	0.0349769	0.145548	-3.02414	normal	0.955649	0.144541	normal	0.932074	0.29674	normal	0.551072	-1.62795	normal	--	--	Cellular Component: nucleus (GO:0005634);; Cellular Component: plastid (GO:0009536);; Molecular Function: protein dimerization activity (GO:0046983);;	--	--	--	Helix-loop-helix DNA-binding domain	Transcription factor bHLH48 GN=MHK10.2 OS=Arabidopsis thaliana (Mouse-ear cress) PE=2 SV=1	K	Transcription	PREDICTED: transcription factor bHLH48-like [Setaria italica]	cellular component: cell (GO:0005623);; cellular component: organelle (GO:0043226);; cellular component: cell part (GO:0044464);; molecular function: binding (GO:0005488)	--
BMK_Unigene_034731	bHLH	TF	0	1.35506	2.25666	0	0	0	0.000897166	5.70173	up	0.000104613	6.23561	up	--	--	--	--	--	--	--	--	--	--	--	--	Helix-loop-helix DNA-binding domain	--	--	--	--	--	--
BMK_Unigene_034744	bHLH	TF	0.171976	1.83475	1.60382	0	0.0358767	0	0.00378712	3.44848	up	8.97872e-05	3.52621	up	0.751897	0.786137	normal	--	--	--	--	--	Molecular Function: protein dimerization activity (GO:0046983);;	--	[K]	Transcription	Helix-loop-helix DNA-binding domain	--	S	Function unknown	putative helix-loop-helix dna-binding domain-containing protein [Togninia minima UCRPA7]	molecular function: binding (GO:0005488)	--
BMK_Unigene_035895	bHLH	TF	43.5925	20.357	18.4353	25.7914	19.2056	40.0412	0.197393	-0.703289	normal	0.226982	-0.762739	normal	0.931662	-0.112056	normal	0.106159	1.01283	normal	[J]	Translation, ribosomal structure and biogenesis	Molecular Function: RNA binding (GO:0003723);; Molecular Function: structural constituent of ribosome (GO:0003735);; Cellular Component: nucleus (GO:0005634);; Biological Process: translation (GO:0006412);; Cellular Component: cytosolic small ribosomal subunit (GO:0022627);; Molecular Function: protein dimerization activity (GO:0046983);;	--	--	--	Helix-loop-helix DNA-binding domain;; Ribosomal protein S14p/S29e	40S ribosomal protein S29 GN=RPS29 OS=Triticum aestivum (Wheat) PE=1 SV=1	K	Transcription	PREDICTED: transcription factor bHLH54-like [Setaria italica]	molecular function: binding (GO:0005488);; molecular function: structural molecule activity (GO:0005198);; cellular component: cell (GO:0005623);; cellular component: organelle (GO:0043226);; cellular component: cell part (GO:0044464);; biological process: metabolic process (GO:0008152);; biological process: cellular process (GO:0009987);; cellular component: macromolecular complex (GO:0032991);;…	--
BMK_Unigene_036411	bHLH	TF	3.69283	17.1346	56.4469	1.9516	5.08381	25.5056	2.68981e-08	2.54861	up	2.58304e-17	4.36613	up	0.274928	1.53158	normal	1.60157e-12	3.92485	up	--	--	Molecular Function: binding (GO:0005488);;	--	--	--	Helix-loop-helix DNA-binding domain	Transcription factor bHLH94 GN=F12K8.16 OS=Arabidopsis thaliana (Mouse-ear cress) PE=2 SV=2	K	Transcription	PREDICTED: transcription factor bHLH96-like [Setaria italica]	molecular function: binding (GO:0005488)	--
BMK_Unigene_039399	bHLH	TF	0.112117	2.84944	0	4.28918	0.97027	0.204952	0.00864899	3.76041	up	0.650012	-1.51245	normal	0.905069	-0.416058	normal	0.699326	-1.1114	normal	--	--	--	--	--	--	Helix-loop-helix DNA-binding domain	--	R	General function prediction only	hypothetical protein SORBIDRAFT_03g036100 [Sorghum bicolor]	--	--
BMK_Unigene_039455	bHLH	TF	3.72234	11.6021	1.36071	1.8243	4.97792	0.353406	0.00369788	1.87823	up	0.650012	-0.814564	normal	0.52534	1.70404	normal	0.699326	-0.900384	normal	--	--	Cellular Component: nucleus (GO:0005634);;	--	--	--	Helix-loop-helix DNA-binding domain	Transcription factor HEC2 GN=F11C1.170 OS=Arabidopsis thaliana (Mouse-ear cress) PE=1 SV=1	K	Transcription	PREDICTED: transcription factor bHLH69-like [Setaria italica]	cellular component: cell (GO:0005623);; cellular component: organelle (GO:0043226);; cellular component: cell part (GO:0044464)	--
BMK_Unigene_041010	bHLH	TF	5.32559	2.99018	3.00614	3.74166	2.52914	3.74025	0.952033	0.228673	normal	0.977811	-0.0974032	normal	0.797119	-0.754837	normal	0.699326	-1.0718	normal	--	--	Molecular Function: DNA binding (GO:0003677);; Cellular Component: nucleus (GO:0005634);; Molecular Function: protein dimerization activity (GO:0046983);;	--	--	--	Helix-loop-helix DNA-binding domain	Transcription factor bHLH121 GN=MPN9.10 OS=Arabidopsis thaliana (Mouse-ear cress) PE=2 SV=1	K	Transcription	PREDICTED: transcription factor bHLH121-like [Setaria italica]	molecular function: binding (GO:0005488);; cellular component: cell (GO:0005623);; cellular component: organelle (GO:0043226);; cellular component: cell part (GO:0044464)	--
BMK_Unigene_042819	bHLH	TF	4.41691	36.19	1.25072	11.6561	19.8087	1.1548	0.00493267	4.46198	up	0.880909	0.516808	normal	0.751897	1.02426	normal	--	--	--	--	--	Molecular Function: binding (GO:0005488);; Cellular Component: nucleus (GO:0005634);;	--	--	--	Helix-loop-helix DNA-binding domain	Transcription factor bHLH35 GN=MUL3.10 OS=Arabidopsis thaliana (Mouse-ear cress) PE=2 SV=1	K	Transcription	PREDICTED: transcription factor bHLH35-like isoform X1 [Setaria italica]	molecular function: binding (GO:0005488);; cellular component: cell (GO:0005623);; cellular component: organelle (GO:0043226);; cellular component: cell part (GO:0044464)	--
BMK_Unigene_043624	bHLH	TF	0.106	2.24202	0.972895	0.0394105	0	0	8.26814e-05	4.36235	up	0.0625606	3.09322	normal	0.751897	-0.72772	normal	0.699326	-0.785182	normal	--	--	--	--	--	--	Helix-loop-helix DNA-binding domain	--	K	Transcription	hypothetical protein PHYSODRAFT_336281 [Phytophthora sojae]	--	--
BMK_Unigene_043952	bHLH	TF	14.1987	26.4771	7.55522	12.4068	12.609	4.69679	0.0466617	1.28018	normal	0.67665	-0.460913	normal	0.751897	0.39942	normal	0.0465187	-0.993129	normal	--	--	Molecular Function: DNA binding (GO:0003677);; Cellular Component: nucleus (GO:0005634);; Molecular Function: protein dimerization activity (GO:0046983);;	--	--	--	Helix-loop-helix DNA-binding domain	Transcription factor bHLH25 GN=T28I19.130 OS=Arabidopsis thaliana (Mouse-ear cress) PE=2 SV=2	K	Transcription	PREDICTED: transcription factor bHLH18-like [Setaria italica]	molecular function: binding (GO:0005488);; cellular component: cell (GO:0005623);; cellular component: organelle (GO:0043226);; cellular component: cell part (GO:0044464)	--
BMK_Unigene_044203	bHLH	TF	22.702	28.6703	51.1083	32.9394	46.8436	42.9539	0.00260017	1.6192	up	3.942e-06	2.36057	up	0.723066	0.535963	normal	0.699326	0.379873	normal	--	--	Cellular Component: nucleus (GO:0005634);; Cellular Component: plastid (GO:0009536);; Molecular Function: protein dimerization activity (GO:0046983);;	--	--	--	Helix-loop-helix DNA-binding domain	Transcription factor bHLH51 GN=T7M7.8 OS=Arabidopsis thaliana (Mouse-ear cress) PE=2 SV=1	K	Transcription	PREDICTED: transcription factor bHLH30-like isoform X1 [Setaria italica]	cellular component: cell (GO:0005623);; cellular component: organelle (GO:0043226);; cellular component: cell part (GO:0044464);; molecular function: binding (GO:0005488)	--
BMK_Unigene_044318	bHLH	TF	19.8957	106.619	25.4813	33.7659	18.4794	42.4805	2.03253e-12	2.86839	up	0.221384	0.83821	normal	0.751897	-0.556442	normal	0.654934	0.647169	normal	--	--	Cellular Component: nucleus (GO:0005634);; Cellular Component: mitochondrion (GO:0005739);; Molecular Function: protein dimerization activity (GO:0046983);;	--	--	--	Helix-loop-helix DNA-binding domain	Transcription factor bHLH128 GN=T20M3.7 OS=Arabidopsis thaliana (Mouse-ear cress) PE=1 SV=1	K	Transcription	PREDICTED: transcription factor bHLH128-like, partial [Setaria italica]	cellular component: cell (GO:0005623);; cellular component: organelle (GO:0043226);; cellular component: cell part (GO:0044464);; molecular function: binding (GO:0005488)	--
BMK_Unigene_046703	bHLH	TF	4.41125	1.6341	2.81517	4.41612	2.62546	1.75918	0.865624	0.374489	normal	0.650012	-1.36992	normal	0.956872	-0.219968	normal	0.784906	0.698538	normal	--	--	Cellular Component: nucleus (GO:0005634);; Cellular Component: mitochondrion (GO:0005739);; Cellular Component: plastid (GO:0009536);; Molecular Function: protein dimerization activity (GO:0046983);;	K12126|0|sita:101757582|transcription factor PIF3-like; K12126 phytochrome-interacting factor 3 (A)	--	--	Helix-loop-helix DNA-binding domain	Transcription factor APG OS=Oryza sativa subsp. japonica (Rice) PE=1 SV=1	--	--	PREDICTED: transcription factor PIF3-like isoform X1 [Setaria italica]	cellular component: cell (GO:0005623);; cellular component: organelle (GO:0043226);; cellular component: cell part (GO:0044464);; molecular function: binding (GO:0005488)	Plant hormone signal transduction (ko04075);; Circadian rhythm - plant (ko04712)
BMK_Unigene_046899	bHLH	TF	10.0814	5.86748	4.9715	10.9711	6.62745	5.09502	0.593392	-0.394638	normal	0.489174	-0.490847	normal	0.751897	-0.435548	normal	0.361558	-0.726674	normal	--	--	Cellular Component: nucleus (GO:0005634);; Molecular Function: protein dimerization activity (GO:0046983);;	--	--	--	Helix-loop-helix DNA-binding domain	Transcription factor bHLH49 GN=T6L1.10 OS=Arabidopsis thaliana (Mouse-ear cress) PE=1 SV=1	--	--	PREDICTED: transcription factor bHLH49-like [Setaria italica]	cellular component: cell (GO:0005623);; cellular component: organelle (GO:0043226);; cellular component: cell part (GO:0044464);; molecular function: binding (GO:0005488)	--
BMK_Unigene_048269	bHLH	TF	9.84445	5.4847	9.07878	5.75802	8.44034	7.81611	0.254958	-0.651142	normal	0.649003	0.402756	normal	0.33384	0.834832	normal	0.310737	0.792081	normal	--	--	--	--	--	--	Helix-loop-helix DNA-binding domain	Transcription factor bHLH25 GN=T28I19.130 OS=Arabidopsis thaliana (Mouse-ear cress) PE=2 SV=2	K	Transcription	PREDICTED: transcription factor ATR2-like isoform X1 [Setaria italica]	--	--
BMK_Unigene_048758	bHLH	TF	14.4281	18.0987	14.1567	16.3575	16.4782	13.0028	0.274224	0.977839	normal	0.563766	0.660649	normal	0.927477	0.199743	normal	0.908787	0.15021	normal	--	--	Molecular Function: DNA binding (GO:0003677);; Cellular Component: nucleus (GO:0005634);; Biological Process: regulation of transcription, DNA-templated (GO:0006355);; Molecular Function: protein dimerization activity (GO:0046983);;	--	--	--	Helix-loop-helix DNA-binding domain	Transcription factor bHLH82 GN=F2C19.2 OS=Arabidopsis thaliana (Mouse-ear cress) PE=2 SV=1	--	--	PREDICTED: putative transcription factor bHLH041-like [Setaria italica]	molecular function: binding (GO:0005488);; cellular component: cell (GO:0005623);; cellular component: organelle (GO:0043226);; cellular component: cell part (GO:0044464);; biological process: biological regulation (GO:0065007)	--
BMK_Unigene_049618	bHLH	TF	13.2676	71.9281	66.9469	18.5291	38.6579	74.3779	1.80632e-08	2.99925	up	1.05991e-17	3.21525	up	0.198678	1.36581	normal	5.95623e-07	2.53698	up	--	--	Molecular Function: DNA binding (GO:0003677);; Molecular Function: protein dimerization activity (GO:0046983);;	--	--	--	Helix-loop-helix DNA-binding domain;; zinc-binding in reverse transcriptase	Transcription factor bHLH130 GN=T24P15.19 OS=Arabidopsis thaliana (Mouse-ear cress) PE=1 SV=1	K	Transcription	PREDICTED: transcription factor bHLH130-like isoform X2 [Setaria italica]	molecular function: binding (GO:0005488)	--
BMK_Unigene_049833	bHLH	TF	13.4016	7.3274	10.072	16.3766	16.1903	30.8171	0.896551	-0.214902	normal	0.869824	0.319432	normal	0.968616	-0.199053	normal	0.626993	1.28776	normal	--	--	Cellular Component: intracellular membrane-bounded organelle (GO:0043231);;	--	--	--	Helix-loop-helix DNA-binding domain	Transcription factor bHLH82 GN=F2C19.2 OS=Arabidopsis thaliana (Mouse-ear cress) PE=2 SV=1	--	--	PREDICTED: uncharacterized protein LOC101783147 isoform X2 [Setaria italica]	cellular component: cell (GO:0005623);; cellular component: organelle (GO:0043226);; cellular component: cell part (GO:0044464)	--
BMK_Unigene_050300	bHLH	TF	33.2507	25.7737	10.7078	12.7478	12.3857	4.96033	0.424139	0.687262	normal	0.0699559	-0.911516	normal	0.427565	1.01132	normal	0.145621	-1.15373	normal	--	--	Cellular Component: mitochondrion (GO:0005739);; Molecular Function: protein dimerization activity (GO:0046983);;	--	[TO]	--	Helix-loop-helix DNA-binding domain;; OTU-like cysteine protease	OTU domain-containing protein At3g57810 GN=At3g57810 OS=Arabidopsis thaliana (Mouse-ear cress) PE=2 SV=1	K	Transcription	PREDICTED: transcription factor bHLH128-like [Setaria italica]	cellular component: cell (GO:0005623);; cellular component: organelle (GO:0043226);; cellular component: cell part (GO:0044464);; molecular function: binding (GO:0005488)	--
BMK_Unigene_050469	bHLH	TF	38.6898	90.5157	67.1085	83.3461	92.0579	73.2812	0.0101627	1.71391	normal	0.356156	1.10512	normal	0.401433	1.02406	normal	0.526602	0.631074	normal	--	--	Cellular Component: nucleus (GO:0005634);; Molecular Function: protein dimerization activity (GO:0046983);;	--	--	--	Helix-loop-helix DNA-binding domain	Transcription factor BIM2 GN=T6L1.19 OS=Arabidopsis thaliana (Mouse-ear cress) PE=1 SV=1	K	Transcription	PREDICTED: transcription factor BIM2-like isoform X2 [Setaria italica]	cellular component: cell (GO:0005623);; cellular component: organelle (GO:0043226);; cellular component: cell part (GO:0044464);; molecular function: binding (GO:0005488)	--
BMK_Unigene_054691	bHLH	TF	0.315005	0.223726	0.0867441	0.128403	0.170863	0.210425	0.970028	-0.107174	normal	0.743729	-0.911631	normal	0.932658	0.351833	normal	0.7918	0.675553	normal	--	--	--	--	--	--	Helix-loop-helix DNA-binding domain	--	K	Transcription	--	--	--
BMK_Unigene_068871	bHLH	TF	0.989193	0.0383901	0.11128	0.111124	0.072009	0.175908	0.10445	-3.2453	normal	0.310091	-2.16605	normal	0.978679	-0.138275	normal	0.880669	0.461291	normal	--	--	Molecular Function: protein dimerization activity (GO:0046983);;	--	--	--	Helix-loop-helix DNA-binding domain	Transcription factor NAI1 GN=T30L20.3 OS=Arabidopsis thaliana (Mouse-ear cress) PE=2 SV=1	K	Transcription	PREDICTED: transcription factor NAI1-like [Setaria italica]	molecular function: binding (GO:0005488)	--
BMK_Unigene_071229	bHLH	TF	1.22468	0	0	0.890818	0.407021	0	0.0433606	-4.26944	normal	0.075095	-3.97614	normal	0.755865	-0.709738	normal	0.0366112	-3.48342	normal	--	--	Molecular Function: DNA binding (GO:0003677);; Cellular Component: plastid (GO:0009536);; Molecular Function: protein dimerization activity (GO:0046983);;	--	--	--	Helix-loop-helix DNA-binding domain	Transcription factor ILI5 OS=Oryza sativa subsp. japonica (Rice) PE=1 SV=1	K	Transcription	DNA binding protein [Zea mays]	molecular function: binding (GO:0005488);; cellular component: cell (GO:0005623);; cellular component: organelle (GO:0043226);; cellular component: cell part (GO:0044464)	--
BMK_Unigene_071767	bHLH	TF	0.0786126	0	0	1.19425	2.02783	1.36518	0.60326	-1.61688	normal	0.650012	-1.49102	normal	0.751897	0.781293	normal	0.7377	0.473669	normal	--	--	--	--	--	--	Helix-loop-helix DNA-binding domain	--	S	Function unknown	hypothetical protein LEMA_P043510.1 [Leptosphaeria maculans JN3]	--	--
BMK_Unigene_073467	bHLH	TF	0.820088	1.08683	0.136419	0.274901	0.68202	0.316426	0.613943	0.722459	normal	0.541927	-1.63879	normal	0.751897	1.21161	normal	0.896724	0.3808	normal	--	--	Cellular Component: plastid (GO:0009536);; Molecular Function: protein dimerization activity (GO:0046983);;	--	--	--	Helix-loop-helix DNA-binding domain	Transcription factor TT8 GN=F17A8.170 OS=Arabidopsis thaliana (Mouse-ear cress) PE=1 SV=2	S	Function unknown	PREDICTED: transcription factor bHLH18-like [Brachypodium distachyon]	cellular component: cell (GO:0005623);; cellular component: organelle (GO:0043226);; cellular component: cell part (GO:0044464);; molecular function: binding (GO:0005488)	--
BMK_Unigene_075476	bHLH	TF	0.0622021	0.297974	0.232613	0.20745	0.288475	0.0862198	0.557238	1.80672	normal	0.650012	1.5682	normal	0.930807	0.362808	normal	0.861518	-0.513337	normal	--	--	Cellular Component: intracellular membrane-bounded organelle (GO:0043231);;	--	--	--	Helix-loop-helix DNA-binding domain	Transcription factor AIG1 GN=K13N2.1 OS=Arabidopsis thaliana (Mouse-ear cress) PE=1 SV=1	R	General function prediction only	PREDICTED: transcription factor bHLH30-like, partial [Setaria italica]	cellular component: cell (GO:0005623);; cellular component: organelle (GO:0043226);; cellular component: cell part (GO:0044464)	--
BMK_Unigene_076434	bHLH	TF	0.535286	0.0534719	0.261194	0.150746	0.253046	0.303903	0.247829	-3.029	normal	0.89102	-0.391773	normal	0.851852	0.611537	normal	0.772263	0.743635	normal	--	--	Molecular Function: binding (GO:0005488);;	--	--	--	Helix-loop-helix DNA-binding domain	Transcription factor bHLH25 GN=T28I19.130 OS=Arabidopsis thaliana (Mouse-ear cress) PE=2 SV=2	K	Transcription	PREDICTED: transcription factor bHLH18-like [Setaria italica]	molecular function: binding (GO:0005488)	--
BMK_Unigene_078273	bHLH	TF	1.68231	1.98856	4.65013	0.586298	0.4544	0.257576	0.716087	0.550942	normal	0.0300179	1.89564	normal	0.985259	-0.0923656	normal	0.769703	-0.635323	normal	--	--	Molecular Function: protein dimerization activity (GO:0046983);;	--	--	--	Helix-loop-helix DNA-binding domain	--	R	General function prediction only	PREDICTED: transcription factor bHLH35-like isoform X1 [Setaria italica]	molecular function: binding (GO:0005488)	--
BMK_Unigene_078368	bHLH	TF	2.98159	0.0843469	0.165454	0.341983	0	0.43983	--	--	--	--	--	--	0.596317	-1.82335	normal	0.973845	-0.109939	normal	--	--	--	--	--	--	Helix-loop-helix DNA-binding domain	Transcription factor bHLH35 GN=MUL3.10 OS=Arabidopsis thaliana (Mouse-ear cress) PE=2 SV=1	K	Transcription	PREDICTED: transcription factor bHLH35-like isoform X1 [Setaria italica]	--	--
BMK_Unigene_080113	bHLH	TF	0.912497	0.24322	0.127237	0	0	0.117512	0.803471	-0.772365	normal	0.715745	-1.07568	normal	--	--	--	--	--	--	--	--	Cellular Component: nucleus (GO:0005634);; Molecular Function: protein dimerization activity (GO:0046983);;	--	--	--	Helix-loop-helix DNA-binding domain	Transcription factor BPE GN=T30E16.21 OS=Arabidopsis thaliana (Mouse-ear cress) PE=2 SV=1	K	Transcription	PREDICTED: transcription factor bHLH78-like, partial [Oryza brachyantha]	cellular component: cell (GO:0005623);; cellular component: organelle (GO:0043226);; cellular component: cell part (GO:0044464);; molecular function: binding (GO:0005488)	--
BMK_Unigene_080704	bHLH	TF	0.227938	0	0.00776654	0.927759	0.776754	2.87915	0.0263588	-4.47156	normal	0.115341	-3.24066	normal	0.991566	0.0310082	normal	0.00643733	1.88169	up	--	--	Molecular Function: protein dimerization activity (GO:0046983);;	--	--	--	Helix-loop-helix DNA-binding domain	--	K	Transcription	hypothetical protein SNOG_15057 [Phaeosphaeria nodorum SN15]	molecular function: binding (GO:0005488)	--
BMK_Unigene_081084	bHLH	TF	5.41385	2.99356	3.121	3.66963	2.62329	3.89247	0.60326	-1.64253	normal	0.840639	0.57706	normal	0.751897	1.37768	normal	0.429602	1.93248	normal	--	--	Molecular Function: DNA binding (GO:0003677);; Cellular Component: nucleus (GO:0005634);; Molecular Function: protein dimerization activity (GO:0046983);;	--	--	--	Helix-loop-helix DNA-binding domain	Transcription factor bHLH121 GN=MPN9.10 OS=Arabidopsis thaliana (Mouse-ear cress) PE=2 SV=1	K	Transcription	PREDICTED: transcription factor bHLH121-like [Setaria italica]	molecular function: binding (GO:0005488);; cellular component: cell (GO:0005623);; cellular component: organelle (GO:0043226);; cellular component: cell part (GO:0044464)	--
BMK_Unigene_081919	bHLH	TF	6.40677	4.82124	4.7253	12.0738	6.89807	3.68101	0.907603	-0.194598	normal	0.926916	0.152517	normal	0.751897	-0.538341	normal	0.172654	-1.2873	normal	--	--	Molecular Function: DNA binding (GO:0003677);; Cellular Component: nucleus (GO:0005634);; Molecular Function: protein dimerization activity (GO:0046983);;	--	--	--	Helix-loop-helix DNA-binding domain	Putative transcription factor bHLH041 GN=MHM17.7 OS=Arabidopsis thaliana (Mouse-ear cress) PE=3 SV=1	--	--	PREDICTED: putative transcription factor bHLH041-like [Setaria italica]	molecular function: binding (GO:0005488);; cellular component: cell (GO:0005623);; cellular component: organelle (GO:0043226);; cellular component: cell part (GO:0044464)	--
BMK_Unigene_082136	bHLH	TF	1.45096	0.183845	0.146097	1.88123	0.274827	0.362605	0.316889	-2.11043	normal	0.345087	-2.17293	normal	0.266292	-2.01621	normal	0.282836	-1.6807	normal	--	--	Cellular Component: nucleus (GO:0005634);;	--	--	--	Helix-loop-helix DNA-binding domain	Transcription factor bHLH93 GN=K21L13.16 OS=Arabidopsis thaliana (Mouse-ear cress) PE=1 SV=1	K	Transcription	PREDICTED: transcription factor bHLH93-like [Setaria italica]	cellular component: cell (GO:0005623);; cellular component: organelle (GO:0043226);; cellular component: cell part (GO:0044464)	--
BMK_Unigene_082633	bHLH	TF	5.19429	2.15221	0.80379	9.21508	5.12919	1.15557	0.60326	-0.850089	normal	0.215876	-1.90617	normal	0.927477	-0.35615	normal	0.699326	-0.958181	normal	--	--	--	--	--	--	Helix-loop-helix DNA-binding domain	--	K	Transcription	PREDICTED: uncharacterized protein LOC101784195 [Setaria italica]	--	--
BMK_Unigene_082873	bHLH	TF	212.443	169.963	209.927	198.932	125.636	218.599	0.635931	-0.255769	normal	0.95042	0.0627081	normal	0.751897	-0.405833	normal	0.325392	0.511883	normal	--	--	Molecular Function: DNA binding (GO:0003677);; Cellular Component: mitochondrion (GO:0005739);; Molecular Function: protein dimerization activity (GO:0046983);;	--	--	--	Helix-loop-helix DNA-binding domain	Transcription factor ILR3 GN=K5F14.2 OS=Arabidopsis thaliana (Mouse-ear cress) PE=1 SV=1	--	--	PREDICTED: transcription factor ILR3-like [Setaria italica]	molecular function: binding (GO:0005488);; cellular component: cell (GO:0005623);; cellular component: organelle (GO:0043226);; cellular component: cell part (GO:0044464)	--
BMK_Unigene_083548	bHLH	TF	181.879	106.63	107.832	203.414	154.087	89.0902	0.414148	0.904271	normal	0.439901	1.22227	normal	0.751897	-0.578085	normal	0.0914668	-0.804776	normal	--	--	Molecular Function: DNA binding (GO:0003677);; Cellular Component: nucleus (GO:0005634);; Molecular Function: protein dimerization activity (GO:0046983);;	--	--	--	Helix-loop-helix DNA-binding domain	Transcription factor ORG2 GN=F24I3.50 OS=Arabidopsis thaliana (Mouse-ear cress) PE=1 SV=1	K	Transcription	PREDICTED: transcription factor ORG3-like isoform X1 [Setaria italica]	molecular function: binding (GO:0005488);; cellular component: cell (GO:0005623);; cellular component: organelle (GO:0043226);; cellular component: cell part (GO:0044464)	--
BMK_Unigene_084716	bHLH	TF	4.92957	4.6703	4.80651	4.32605	1.84178	0.74818	0.719149	0.283304	normal	0.60599	0.492759	normal	0.421152	-0.897382	normal	0.000111916	-2.07361	down	--	--	Molecular Function: protein dimerization activity (GO:0046983);;	--	--	--	Helix-loop-helix DNA-binding domain	Transcription factor bHLH25 GN=T28I19.130 OS=Arabidopsis thaliana (Mouse-ear cress) PE=2 SV=2	R	General function prediction only	PREDICTED: transcription factor bHLH25-like [Setaria italica]	molecular function: binding (GO:0005488)	--
BMK_Unigene_084840	bHLH	TF	0.161713	0.402141	0.345739	1.71732	5.49809	4.59594	0.306144	1.54446	normal	0.349922	1.47782	normal	0.00893497	1.88993	up	1.56968e-06	1.76995	up	--	--	Cellular Component: nucleus (GO:0005634);; Cellular Component: mitochondrion (GO:0005739);;	--	--	--	Helix-loop-helix DNA-binding domain	Putative transcription factor bHLH041 GN=MHM17.7 OS=Arabidopsis thaliana (Mouse-ear cress) PE=3 SV=1	--	--	PREDICTED: putative transcription factor bHLH041-like [Setaria italica]	cellular component: cell (GO:0005623);; cellular component: organelle (GO:0043226);; cellular component: cell part (GO:0044464)	--
BMK_Unigene_087312	bHLH	TF	26.85	4.93826	3.70733	27.8375	9.44259	7.02253	0.0382804	-1.25136	normal	0.024319	-1.48625	normal	0.0978213	-1.09441	normal	0.113943	-0.91192	normal	--	--	Cellular Component: nucleus (GO:0005634);; Biological Process: double fertilization forming a zygote and endosperm (GO:0009567);; Molecular Function: protein dimerization activity (GO:0046983);;	--	--	--	Helix-loop-helix DNA-binding domain	Transcription factor UNE12 GN=T10P11.13 OS=Arabidopsis thaliana (Mouse-ear cress) PE=2 SV=2	K	Transcription	PREDICTED: transcription factor UNE12-like [Setaria italica]	cellular component: cell (GO:0005623);; cellular component: organelle (GO:0043226);; cellular component: cell part (GO:0044464);; biological process: reproduction (GO:0000003);; biological process: reproductive process (GO:0022414);; biological process: single-organism process (GO:0044699);; biological process: multi-organism process (GO:0051704);; molecular function: binding (GO:0005488)	--
BMK_Unigene_087517	bHLH	TF	1.69966	0.662921	1.39489	0.868225	0.600404	0.569639	0.908403	-0.169475	normal	0.744979	0.479064	normal	0.965195	-0.12882	normal	0.945701	-0.149193	normal	--	--	Molecular Function: binding (GO:0005488);; Cellular Component: nucleus (GO:0005634);;	--	--	--	Helix-loop-helix DNA-binding domain	Transcription factor bHLH54 GN=T22C5.19 OS=Arabidopsis thaliana (Mouse-ear cress) PE=2 SV=1	K	Transcription	PREDICTED: transcription factor bHLH54-like [Setaria italica]	molecular function: binding (GO:0005488);; cellular component: cell (GO:0005623);; cellular component: organelle (GO:0043226);; cellular component: cell part (GO:0044464)	--
BMK_Unigene_088529	bHLH	TF	38.1224	22.8986	12.1681	17.6059	13.1014	7.89837	0.676957	0.226726	normal	0.217989	-0.741323	normal	0.982788	0.0631869	normal	0.67411	-0.427991	normal	--	--	Molecular Function: DNA binding (GO:0003677);; Cellular Component: mitochondrion (GO:0005739);; Molecular Function: protein dimerization activity (GO:0046983);;	--	--	--	Helix-loop-helix DNA-binding domain;; OTU-like cysteine protease	Transcription factor bHLH128 GN=T20M3.7 OS=Arabidopsis thaliana (Mouse-ear cress) PE=1 SV=1	--	--	PREDICTED: transcription factor bHLH128-like [Setaria italica]	molecular function: binding (GO:0005488);; cellular component: cell (GO:0005623);; cellular component: organelle (GO:0043226);; cellular component: cell part (GO:0044464)	--
BMK_Unigene_088909	bHLH	TF	13.9081	15.5192	22.7596	10.1567	13.7638	15.1608	0.364119	0.613021	normal	0.00535913	1.31945	up	0.751897	0.360637	normal	0.256851	0.738538	normal	--	--	Cellular Component: nucleus (GO:0005634);;	--	--	--	Helix-loop-helix DNA-binding domain	Transcription factor AIG1 GN=K13N2.1 OS=Arabidopsis thaliana (Mouse-ear cress) PE=1 SV=1	K	Transcription	PREDICTED: transcription factor bHLH30-like [Setaria italica]	cellular component: cell (GO:0005623);; cellular component: organelle (GO:0043226);; cellular component: cell part (GO:0044464)	--
BMK_Unigene_090248	bHLH	TF	2.47835	5.09845	1.54284	13.6923	8.65771	2.75815	0.0658371	2.95562	normal	0.150196	2.66484	normal	0.968616	0.161663	normal	0.207311	-2.11232	normal	--	--	Molecular Function: DNA binding (GO:0003677);; Cellular Component: nucleus (GO:0005634);; Molecular Function: protein dimerization activity (GO:0046983);;	--	--	--	Helix-loop-helix DNA-binding domain	Transcription factor bHLH92 GN=K9D7.15 OS=Arabidopsis thaliana (Mouse-ear cress) PE=2 SV=1	K	Transcription	PREDICTED: uncharacterized protein LOC101753784 isoform X1 [Setaria italica]	molecular function: binding (GO:0005488);; cellular component: cell (GO:0005623);; cellular component: organelle (GO:0043226);; cellular component: cell part (GO:0044464)	--
BMK_Unigene_090473	bHLH	TF	13.0119	15.8394	12.8303	15.8311	15.9958	12.2544	0.905261	-0.30542	normal	0.65547	0.810802	normal	0.904183	0.281143	normal	0.759188	-0.458771	normal	--	--	Molecular Function: DNA binding (GO:0003677);; Cellular Component: nucleus (GO:0005634);; Biological Process: regulation of transcription, DNA-templated (GO:0006355);; Molecular Function: protein dimerization activity (GO:0046983);;	--	--	--	Helix-loop-helix DNA-binding domain	Transcription factor bHLH82 GN=F2C19.2 OS=Arabidopsis thaliana (Mouse-ear cress) PE=2 SV=1	--	--	PREDICTED: putative transcription factor bHLH041-like [Setaria italica]	molecular function: binding (GO:0005488);; cellular component: cell (GO:0005623);; cellular component: organelle (GO:0043226);; cellular component: cell part (GO:0044464);; biological process: biological regulation (GO:0065007)	--
BMK_Unigene_095442	bHLH	TF	0	0	0.673262	0	0.252752	0	--	--	--	0.321588	2.84109	normal	0.751897	0.907891	normal	--	--	--	--	--	Biological Process: mycelium development (GO:0043581);; Molecular Function: protein dimerization activity (GO:0046983);;	--	[K]	Transcription	Helix-loop-helix DNA-binding domain	--	K	Transcription	hypothetical protein PFICI_09831 [Pestalotiopsis fici W106-1]	biological process: multicellular organismal process (GO:0032501);; biological process: developmental process (GO:0032502);; biological process: single-organism process (GO:0044699);; molecular function: binding (GO:0005488)	--
BMK_Unigene_099714	bHLH	TF	0	0	0	0	0.368424	0	--	--	--	--	--	--	0.751897	0.879981	normal	--	--	--	--	--	Molecular Function: protein dimerization activity (GO:0046983);;	--	[K]	Transcription	Helix-loop-helix DNA-binding domain	--	K	Transcription	putative helix-loop-helix dna binding protein [Togninia minima UCRPA7]	molecular function: binding (GO:0005488)	--
BMK_Unigene_100574	bHLH	TF	0	0	0	0	0.314629	0	--	--	--	--	--	--	0.751897	0.861298	normal	--	--	--	--	--	--	--	--	--	Helix-loop-helix DNA-binding domain	--	--	--	hypothetical protein BN14_02321 [Rhizoctonia solani AG-1 IB]	--	--
BMK_Unigene_103614	bHLH	TF	0	0	0	0	0	0	--	--	--	--	--	--	--	--	--	--	--	--	--	--	--	--	--	--	Helix-loop-helix DNA-binding domain	--	K	Transcription	--	--	--
BMK_Unigene_106908	bHLH	TF	0	2.94041	0.225131	0	0.289007	0.0569876	--	--	--	--	--	--	--	--	--	--	--	--	--	--	Molecular Function: protein dimerization activity (GO:0046983);;	--	--	--	Helix-loop-helix DNA-binding domain	--	S	Function unknown	helix loop helix DNA-binding domain protein [Rhizoctonia solani 123E]	molecular function: binding (GO:0005488)	--
BMK_Unigene_107284	bHLH	TF	0.632629	0	0	0.365732	0.0406122	0	0.12399	-3.59672	normal	0.168023	-3.4049	normal	0.751897	-1.20865	normal	0.467723	-1.82061	normal	--	--	--	--	--	--	Helix-loop-helix DNA-binding domain	Transcription factor bHLH84 GN=BHLH84 OS=Arabidopsis thaliana (Mouse-ear cress) PE=2 SV=1	K	Transcription	Transcription factor bHLH84 [Aegilops tauschii]	--	--
BMK_Unigene_002007	bZIP	TF	24.1573	8.66706	13.0817	17.4375	10.7414	10.02	0.200609	-0.898408	normal	0.65547	-0.417242	normal	0.751897	-0.300602	normal	0.967354	-0.047415	normal	--	--	Molecular Function: sequence-specific DNA binding transcription factor activity (GO:0003700);; Biological Process: regulation of transcription, DNA-templated (GO:0006355);; Molecular Function: sequence-specific DNA binding (GO:0043565);;	K14432|0|zma:100501609|putative bZIP transcription factor superfamily protein isoform 1; K14432 ABA responsive element binding factor (A)	--	--	bZIP transcription factor;; Basic region leucine zipper	ABSCISIC ACID-INSENSITIVE 5-like protein 2 GN=T8M16_180 OS=Arabidopsis thaliana (Mouse-ear cress) PE=1 SV=1	K	Transcription	PREDICTED: ABSCISIC ACID-INSENSITIVE 5-like protein 2-like isoform X2 [Setaria italica]	biological process: biological regulation (GO:0065007);; molecular function: nucleic acid binding transcription factor activity (GO:0001071);; molecular function: binding (GO:0005488)	Plant hormone signal transduction (ko04075)
BMK_Unigene_002917	bZIP	TF	164.111	202.61	187.346	94.6199	149.838	114.944	0.99685	-0.00200566	normal	0.867462	0.117442	normal	0.751897	0.324978	normal	0.26437	0.561485	normal	--	--	Molecular Function: sequence-specific DNA binding transcription factor activity (GO:0003700);; Cellular Component: nucleus (GO:0005634);; Cellular Component: mitochondrial respiratory chain (GO:0005746);; Biological Process: regulation of transcription, DNA-templated (GO:0006355);; Cellular Component: plastid (GO:0009536);; Cellular Component: integral component of membrane (GO:0016021);; Molecul…	--	--	--	bZIP transcription factor;; Basic region leucine zipper	Ocs element-binding factor 1 GN=OBF1 OS=Zea mays (Maize) PE=2 SV=2	--	--	PREDICTED: ocs element-binding factor 1-like [Setaria italica]	biological process: biological regulation (GO:0065007);; molecular function: nucleic acid binding transcription factor activity (GO:0001071);; cellular component: cell (GO:0005623);; cellular component: organelle (GO:0043226);; cellular component: cell part (GO:0044464);; cellular component: membrane (GO:0016020);; cellular component: organelle part (GO:0044422);; cellular component: membrane par…	--
BMK_Unigene_003209	bZIP	TF	22.1786	17.5038	15.1761	20.393	17.2425	17.2035	0.961689	0.0351891	normal	0.979611	-0.0181851	normal	0.981627	0.0355543	normal	0.79833	0.131591	normal	--	--	Molecular Function: sequence-specific DNA binding transcription factor activity (GO:0003700);; Cellular Component: nucleus (GO:0005634);; Biological Process: regulation of transcription, DNA-templated (GO:0006355);; Molecular Function: sequence-specific DNA binding (GO:0043565);;	K14431|0|sita:101770845|transcription factor HBP-1b(c38)-like; K14431 transcription factor TGA (A)	--	--	Seed dormancy control;; bZIP transcription factor;; Basic region leucine zipper	Transcription factor HBP-1b(c38) OS=Triticum aestivum (Wheat) PE=2 SV=1	K	Transcription	PREDICTED: transcription factor HBP-1b(c38)-like isoform X1 [Setaria italica]	biological process: biological regulation (GO:0065007);; molecular function: nucleic acid binding transcription factor activity (GO:0001071);; cellular component: cell (GO:0005623);; cellular component: organelle (GO:0043226);; cellular component: cell part (GO:0044464);; molecular function: binding (GO:0005488)	Plant hormone signal transduction (ko04075)
BMK_Unigene_003276	bZIP	TF	10.3804	2.61408	4.38637	9.73398	4.85908	9.79434	0.0342099	-1.56744	normal	0.563722	-0.724615	normal	0.753206	-0.482866	normal	0.643867	0.712348	normal	--	--	Cellular Component: plastid (GO:0009536);;	--	--	--	bZIP transcription factor;; Basic region leucine zipper	--	S	Function unknown	PREDICTED: uncharacterized protein LOC101767907 [Setaria italica]	cellular component: cell (GO:0005623);; cellular component: organelle (GO:0043226);; cellular component: cell part (GO:0044464)	--
BMK_Unigene_003729	bZIP	TF	50.0145	343.887	248.091	60.181	195.068	400.994	1.07232e-13	3.11308	up	2.68385e-07	2.71179	up	0.0202634	1.63467	normal	1.64924e-15	2.89878	up	--	--	Molecular Function: sequence-specific DNA binding transcription factor activity (GO:0003700);; Cellular Component: nucleus (GO:0005634);; Biological Process: regulation of transcription, DNA-templated (GO:0006355);; Molecular Function: sequence-specific DNA binding (GO:0043565);;	--	--	--	bZIP transcription factor;; Basic region leucine zipper	Basic leucine zipper 9 GN=F6A4.10 OS=Arabidopsis thaliana (Mouse-ear cress) PE=1 SV=1	--	--	PREDICTED: basic leucine zipper 9-like [Setaria italica]	biological process: biological regulation (GO:0065007);; molecular function: nucleic acid binding transcription factor activity (GO:0001071);; cellular component: cell (GO:0005623);; cellular component: organelle (GO:0043226);; cellular component: cell part (GO:0044464);; molecular function: binding (GO:0005488)	--
BMK_Unigene_003961	bZIP	TF	19.6121	22.756	18.0287	16.6361	15.4226	29.6249	0.282223	0.583986	normal	0.650012	0.387761	normal	0.937117	0.152814	normal	0.0328948	1.16976	normal	--	--	Molecular Function: sequence-specific DNA binding transcription factor activity (GO:0003700);; Cellular Component: mitochondrion (GO:0005739);; Biological Process: regulation of transcription, DNA-templated (GO:0006355);; Biological Process: response to xenobiotic stimulus (GO:0009410);; Cellular Component: plastid (GO:0009536);; Biological Process: endoplasmic reticulum unfolded protein response…	K16241|2.78869e-51|sbi:SORBI_03g004290|SORBIDRAFT_03g004290, Sb03g004290; hypothetical protein; K16241 transcription factor HY5 (A)	[K]	Transcription	bZIP transcription factor;; Basic region leucine zipper	Transcription factor HY5 GN=HY5 OS=Solanum lycopersicum (Tomato) PE=2 SV=1	--	--	PREDICTED: transcription factor HY5-like isoform X2 [Setaria italica]	biological process: biological regulation (GO:0065007);; molecular function: nucleic acid binding transcription factor activity (GO:0001071);; cellular component: cell (GO:0005623);; cellular component: organelle (GO:0043226);; cellular component: cell part (GO:0044464);; biological process: response to stimulus (GO:0050896);; biological process: cellular process (GO:0009987);; biological process…	Circadian rhythm - plant (ko04712)
BMK_Unigene_004092	bZIP	TF	9.06279	10.8383	4.39549	0.117237	2.6835	0.0688426	0.627428	0.607321	normal	0.817216	-0.414651	normal	0.751897	1.34838	normal	0.95438	-0.217468	normal	--	--	Molecular Function: sequence-specific DNA binding transcription factor activity (GO:0003700);; Biological Process: regulation of transcription, DNA-templated (GO:0006355);; Molecular Function: sequence-specific DNA binding (GO:0043565);;	--	--	--	bZIP transcription factor;; Basic region leucine zipper;; bZIP Maf transcription factor	--	S	Function unknown	bzip transcription factor idi-4 [Grosmannia clavigera kw1407]	biological process: biological regulation (GO:0065007);; molecular function: nucleic acid binding transcription factor activity (GO:0001071);; molecular function: binding (GO:0005488)	--
BMK_Unigene_006134	bZIP	TF	0.218079	1.33491	0.106558	0.769137	0.207168	0.485734	0.00261855	2.82324	up	0.869439	-0.462368	normal	0.751897	-1.13741	normal	0.920235	-0.277706	normal	--	--	--	--	--	--	bZIP transcription factor;; Basic region leucine zipper;; bZIP Maf transcription factor	--	S	Function unknown	hypothetical protein GUITHDRAFT_162446 [Guillardia theta CCMP2712]	--	--
BMK_Unigene_006161	bZIP	TF	0.662991	19.3872	0.421235	0.0597509	0.381733	0.029416	0.0149267	4.12712	normal	0.896495	-0.393183	normal	0.751897	1.23831	normal	0.861536	-0.472899	normal	--	--	--	--	--	--	bZIP transcription factor;; Basic region leucine zipper	--	S	Function unknown	bZIP transcription factor domain-containing protein [Rhizoctonia solani AG-1 IA]	--	--
BMK_Unigene_007055	bZIP	TF	0.0856643	0.770358	2.01784	0.0166687	0.0164531	0.723091	0.0693267	3.02244	normal	0.219106	3.1365	normal	0.987796	0.0557424	normal	0.0246261	3.55419	normal	--	--	Molecular Function: sequence-specific DNA binding transcription factor activity (GO:0003700);; Biological Process: regulation of transcription, DNA-templated (GO:0006355);; Molecular Function: sequence-specific DNA binding (GO:0043565);;	--	--	--	bZIP transcription factor;; Basic region leucine zipper	--	S	Function unknown	hypothetical protein FG01555.1 [Fusarium graminearum PH-1]	biological process: biological regulation (GO:0065007);; molecular function: nucleic acid binding transcription factor activity (GO:0001071);; molecular function: binding (GO:0005488)	--
BMK_Unigene_007056	bZIP	TF	2.03555	2.48437	1.82307	0	0.3753	0	0.613943	0.636965	normal	0.744066	0.338595	normal	0.0602505	3.48957	normal	--	--	--	--	--	--	--	--	--	bZIP transcription factor;; Basic region leucine zipper	--	S	Function unknown	putative bzip transcription factor protein [Togninia minima UCRPA7]	--	--
BMK_Unigene_007751	bZIP	TF	1.44025	0.508643	0.480467	1.24039	1.14134	0.218832	0.502294	-1.0598	normal	0.585237	-0.975565	normal	0.984042	0.0906879	normal	0.114294	-1.89655	normal	--	--	Molecular Function: sequence-specific DNA binding transcription factor activity (GO:0003700);; Biological Process: regulation of transcription, DNA-templated (GO:0006355);; Molecular Function: sequence-specific DNA binding (GO:0043565);;	--	--	--	bZIP transcription factor;; Basic region leucine zipper	Transcription factor RF2a OS=Oryza sativa subsp. japonica (Rice) PE=1 SV=1	--	--	PREDICTED: transcription factor RF2a-like [Setaria italica]	biological process: biological regulation (GO:0065007);; molecular function: nucleic acid binding transcription factor activity (GO:0001071);; molecular function: binding (GO:0005488)	--
BMK_Unigene_008188	bZIP	TF	58.2439	12.4219	7.79049	39.6635	12.4335	23.2444	1.72716e-05	-1.83402	down	8.37735e-05	-2.36118	down	0.0180061	-1.34327	normal	0.699326	-0.368658	normal	--	--	Molecular Function: sequence-specific DNA binding transcription factor activity (GO:0003700);; Biological Process: regulation of transcription, DNA-templated (GO:0006355);; Cellular Component: plastid (GO:0009536);; Molecular Function: sequence-specific DNA binding (GO:0043565);;	--	--	--	bZIP transcription factor;; Basic region leucine zipper	Ocs element-binding factor 1 GN=OBF1 OS=Zea mays (Maize) PE=2 SV=2	K	Transcription	hypothetical protein SORBIDRAFT_04g002700 [Sorghum bicolor]	biological process: biological regulation (GO:0065007);; molecular function: nucleic acid binding transcription factor activity (GO:0001071);; cellular component: cell (GO:0005623);; cellular component: organelle (GO:0043226);; cellular component: cell part (GO:0044464);; molecular function: binding (GO:0005488)	--
BMK_Unigene_008632	bZIP	TF	15.4492	9.02776	9.3815	8.29115	7.30686	7.10345	0.557238	-0.399813	normal	0.764821	-0.221721	normal	0.940599	0.103684	normal	0.80082	0.159899	normal	--	--	Molecular Function: sequence-specific DNA binding transcription factor activity (GO:0003700);; Biological Process: regulation of transcription, DNA-templated (GO:0006355);; Molecular Function: sequence-specific DNA binding (GO:0043565);;	--	--	--	Basic region leucine zipper;; bZIP transcription factor	--	--	--	PREDICTED: uncharacterized protein LOC101760983 isoform X1 [Setaria italica]	biological process: biological regulation (GO:0065007);; molecular function: nucleic acid binding transcription factor activity (GO:0001071);; molecular function: binding (GO:0005488)	--
BMK_Unigene_008880	bZIP	TF	25.266	25.4714	28.7676	21.8851	28.628	27.1594	0.500705	0.380991	normal	0.171269	0.694538	normal	0.467334	0.664798	normal	0.0553172	0.68249	normal	--	--	Molecular Function: sequence-specific DNA binding transcription factor activity (GO:0003700);; Biological Process: regulation of transcription, DNA-templated (GO:0006355);; Molecular Function: sequence-specific DNA binding (GO:0043565);; Biological Process: cellular response to zinc ion (GO:0071294);;	--	--	--	Basic region leucine zipper;; bZIP transcription factor	--	--	--	PREDICTED: uncharacterized protein LOC101762708 isoform X1 [Setaria italica]	biological process: biological regulation (GO:0065007);; molecular function: nucleic acid binding transcription factor activity (GO:0001071);; molecular function: binding (GO:0005488);; biological process: cellular process (GO:0009987);; biological process: response to stimulus (GO:0050896)	--
BMK_Unigene_008894	bZIP	TF	0	0.0238205	6.94107	0	2.25037	0.0230178	--	--	--	0.36502	2.6837	normal	0.751897	1.11087	normal	--	--	--	--	--	Molecular Function: sequence-specific DNA binding transcription factor activity (GO:0003700);; Biological Process: regulation of transcription, DNA-templated (GO:0006355);; Molecular Function: sequence-specific DNA binding (GO:0043565);;	--	--	--	bZIP transcription factor;; Basic region leucine zipper	--	--	--	hypothetical protein MYCTH_2135800 [Myceliophthora thermophila ATCC 42464]	biological process: biological regulation (GO:0065007);; molecular function: nucleic acid binding transcription factor activity (GO:0001071);; molecular function: binding (GO:0005488)	--
BMK_Unigene_009140	bZIP	TF	2.64908	4.07305	2.28132	0.0404559	0.568805	0	0.397215	0.963541	normal	0.851911	0.326018	normal	0.207139	2.65104	normal	0.699326	-0.869059	normal	--	--	--	--	--	--	Basic region leucine zipper	--	S	Function unknown	transcriptional activator hac1 [Colletotrichum fioriniae PJ7]	--	--
BMK_Unigene_009692	bZIP	TF	0.188208	1.01177	0.487863	1.87229	1.25695	1.08139	0.148016	2.43643	normal	0.499488	1.60341	normal	0.907898	-0.246287	normal	0.822949	-0.356852	normal	--	--	Molecular Function: sequence-specific DNA binding transcription factor activity (GO:0003700);; Cellular Component: nucleus (GO:0005634);; Biological Process: regulation of transcription, DNA-templated (GO:0006355);; Biological Process: response to cold (GO:0009409);; Biological Process: response to water deprivation (GO:0009414);; Biological Process: response to salt stress (GO:0009651);; Biologi…	K14432|9.49217e-93|sita:101772577|protein ABSCISIC ACID-INSENSITIVE 5-like; K14432 ABA responsive element binding factor (A)	--	--	bZIP transcription factor;; Basic region leucine zipper	Protein ABSCISIC ACID-INSENSITIVE 5 GN=At2g36270 OS=Arabidopsis thaliana (Mouse-ear cress) PE=1 SV=1	K	Transcription	PREDICTED: protein ABSCISIC ACID-INSENSITIVE 5-like [Setaria italica]	biological process: biological regulation (GO:0065007);; molecular function: nucleic acid binding transcription factor activity (GO:0001071);; cellular component: cell (GO:0005623);; cellular component: organelle (GO:0043226);; cellular component: cell part (GO:0044464);; biological process: response to stimulus (GO:0050896);; biological process: multicellular organismal process (GO:0032501);; bi…	Plant hormone signal transduction (ko04075)
BMK_Unigene_010270	bZIP	TF	14.4454	6.37383	7.09739	15.0274	8.44714	6.98281	0.0507785	-0.796759	normal	0.41229	-0.508528	normal	0.468723	-0.546552	normal	0.0663966	-0.723774	normal	--	--	Molecular Function: sequence-specific DNA binding transcription factor activity (GO:0003700);; Biological Process: regulation of transcription, DNA-templated (GO:0006355);; Molecular Function: sequence-specific DNA binding (GO:0043565);;	--	--	--	bZIP transcription factor;; Basic region leucine zipper	TGACG-sequence-specific DNA-binding protein TGA-1B (Fragment) GN=TGA1B OS=Nicotiana tabacum (Common tobacco) PE=2 SV=1	S	Function unknown	PREDICTED: uncharacterized protein LOC101778763 [Setaria italica]	biological process: biological regulation (GO:0065007);; molecular function: nucleic acid binding transcription factor activity (GO:0001071);; molecular function: binding (GO:0005488)	--
BMK_Unigene_010382	bZIP	TF	5.80213	14.4272	3.80844	0.026724	4.3529	0.0382551	0.06644	1.63598	normal	0.985731	-0.0294606	normal	4.04437e-05	5.25579	up	0.896373	0.403764	normal	--	--	--	--	[K]	Transcription	bZIP transcription factor;; Basic region leucine zipper	--	S	Function unknown	hypothetical protein S40285_06354 [Stachybotrys chlorohalonata IBT 40285]	--	--
BMK_Unigene_010397	bZIP	TF	0.670739	3.40193	1.65357	0.891863	3.52097	4.67451	0.00370045	2.57884	up	0.164485	1.71032	normal	0.136813	2.01985	normal	0.001382	2.57252	up	--	--	Molecular Function: sequence-specific DNA binding transcription factor activity (GO:0003700);; Cellular Component: nucleus (GO:0005634);; Biological Process: regulation of transcription, DNA-templated (GO:0006355);; Molecular Function: sequence-specific DNA binding (GO:0043565);;	--	--	--	bZIP transcription factor;; Basic region leucine zipper	Transcription factor RF2a OS=Oryza sativa subsp. japonica (Rice) PE=1 SV=1	S	Function unknown	PREDICTED: probable transcription factor PosF21-like isoform X2 [Setaria italica]	biological process: biological regulation (GO:0065007);; molecular function: nucleic acid binding transcription factor activity (GO:0001071);; cellular component: cell (GO:0005623);; cellular component: organelle (GO:0043226);; cellular component: cell part (GO:0044464);; molecular function: binding (GO:0005488)	--
BMK_Unigene_011069	bZIP	TF	0.263615	6.25447	0.646619	0.153709	0.0566589	0.132733	1.73256e-07	4.638	up	0.576177	1.47049	normal	0.893341	-0.493995	normal	0.976978	0.093809	normal	--	--	Molecular Function: sequence-specific DNA binding transcription factor activity (GO:0003700);; Biological Process: regulation of transcription, DNA-templated (GO:0006355);; Molecular Function: sequence-specific DNA binding (GO:0043565);;	--	--	--	Basic region leucine zipper;; bZIP transcription factor	--	S	Function unknown	bZIP transcription factor [Rhizoctonia solani AG-3 Rhs1AP]	biological process: biological regulation (GO:0065007);; molecular function: nucleic acid binding transcription factor activity (GO:0001071);; molecular function: binding (GO:0005488)	--
BMK_Unigene_011514	bZIP	TF	0.273498	1.69756	0.681382	0.343908	1.90245	0.724033	0.00297117	2.8372	up	0.293021	1.6269	normal	0.0178774	2.42908	normal	0.330499	1.29311	normal	--	--	Molecular Function: sequence-specific DNA binding transcription factor activity (GO:0003700);; Cellular Component: nucleus (GO:0005634);; Biological Process: regulation of transcription, DNA-templated (GO:0006355);; Molecular Function: sequence-specific DNA binding (GO:0043565);;	K09060|1.07726e-175|sita:101779496|G-box-binding factor 3-like; K09060 plant G-box-binding factor (A)	--	--	G-box binding protein MFMR;; bZIP transcription factor;; Basic region leucine zipper;; bZIP Maf transcription factor	G-box-binding factor 3 GN=T3F17.8 OS=Arabidopsis thaliana (Mouse-ear cress) PE=1 SV=2	K	Transcription	PREDICTED: G-box-binding factor 3-like [Setaria italica]	biological process: biological regulation (GO:0065007);; molecular function: nucleic acid binding transcription factor activity (GO:0001071);; cellular component: cell (GO:0005623);; cellular component: organelle (GO:0043226);; cellular component: cell part (GO:0044464);; molecular function: binding (GO:0005488)	--
BMK_Unigene_012469	bZIP	TF	0.556463	0.893407	0.970382	0.653861	0.975141	1.66788	0.60326	0.99378	normal	0.576098	1.21889	normal	0.751897	0.787011	normal	0.0538073	1.62364	normal	--	--	Molecular Function: sequence-specific DNA binding transcription factor activity (GO:0003700);; Biological Process: regulation of transcription, DNA-templated (GO:0006355);; Cellular Component: cytoplasmic membrane-bounded vesicle (GO:0016023);; Molecular Function: sequence-specific DNA binding (GO:0043565);;	--	--	--	bZIP transcription factor;; Basic region leucine zipper	--	S	Function unknown	Os02g0191600 [Oryza sativa Japonica Group]	biological process: biological regulation (GO:0065007);; molecular function: nucleic acid binding transcription factor activity (GO:0001071);; cellular component: cell (GO:0005623);; cellular component: organelle (GO:0043226);; cellular component: cell part (GO:0044464);; molecular function: binding (GO:0005488)	--
BMK_Unigene_012478	bZIP	TF	8.3317	0.848787	1.53668	1.95692	1.59796	0.427239	1.74836e-05	-2.8404	down	0.219926	-1.71027	normal	0.998425	0.00340805	normal	0.177636	-1.63478	normal	--	--	Molecular Function: sequence-specific DNA binding transcription factor activity (GO:0003700);; Biological Process: regulation of transcription, DNA-templated (GO:0006355);; Cellular Component: plastid (GO:0009536);; Molecular Function: sequence-specific DNA binding (GO:0043565);;	--	--	--	bZIP transcription factor;; Basic region leucine zipper	--	S	Function unknown	PREDICTED: ocs element-binding factor 1-like [Setaria italica]	biological process: biological regulation (GO:0065007);; molecular function: nucleic acid binding transcription factor activity (GO:0001071);; cellular component: cell (GO:0005623);; cellular component: organelle (GO:0043226);; cellular component: cell part (GO:0044464);; molecular function: binding (GO:0005488)	--
BMK_Unigene_012489	bZIP	TF	0.644117	1.63601	0.651142	0	0.310572	0.0715218	0.15542	1.64678	normal	0.794741	0.550168	normal	0.177637	2.92032	normal	0.337484	2.18405	normal	--	--	--	--	--	--	Transcription factor PAP1;; bZIP transcription factor	--	S	Function unknown	putative transcription factor pap1 protein [Togninia minima UCRPA7]	--	--
BMK_Unigene_012500	bZIP	TF	19.0214	25.595	18.4339	10.1571	23.4041	15.3009	0.50753	0.472681	normal	0.905338	0.154894	normal	0.111328	1.19731	normal	0.614718	0.563709	normal	--	--	Molecular Function: sequence-specific DNA binding transcription factor activity (GO:0003700);; Biological Process: regulation of transcription, DNA-templated (GO:0006355);; Biological Process: abscisic acid-activated signaling pathway (GO:0009738);; Molecular Function: sequence-specific DNA binding (GO:0043565);; Molecular Function: transcription regulatory region DNA binding (GO:0044212);;	K14432|7.90798e-131|sita:101765591|bZIP transcription factor TRAB1-like; K14432 ABA responsive element binding factor (A)	--	--	bZIP transcription factor;; Basic region leucine zipper	bZIP transcription factor TRAB1 OS=Oryza sativa subsp. japonica (Rice) PE=1 SV=1	K	Transcription	PREDICTED: bZIP transcription factor TRAB1-like [Setaria italica]	biological process: biological regulation (GO:0065007);; molecular function: nucleic acid binding transcription factor activity (GO:0001071);; biological process: cellular process (GO:0009987);; biological process: signaling (GO:0023052);; biological process: single-organism process (GO:0044699);; biological process: response to stimulus (GO:0050896);; molecular function: binding (GO:0005488)	Plant hormone signal transduction (ko04075)
BMK_Unigene_013257	bZIP	TF	2.79216	2.16869	4.23854	3.61906	1.92024	4.81031	0.981244	0.0241482	normal	0.148527	1.14857	normal	0.751897	-0.612268	normal	0.584103	0.706769	normal	--	--	Molecular Function: sequence-specific DNA binding transcription factor activity (GO:0003700);; Biological Process: regulation of transcription, DNA-templated (GO:0006355);; Molecular Function: sequence-specific DNA binding (GO:0043565);;	--	--	--	bZIP transcription factor;; Basic region leucine zipper	Basic leucine zipper 43 GN=BZIP43 OS=Arabidopsis thaliana (Mouse-ear cress) PE=1 SV=1	K	Transcription	PREDICTED: ocs element-binding factor 1-like [Setaria italica]	biological process: biological regulation (GO:0065007);; molecular function: nucleic acid binding transcription factor activity (GO:0001071);; molecular function: binding (GO:0005488)	--
BMK_Unigene_014193	bZIP	TF	0.805325	2.79777	2.97156	0	0.488309	0.0227015	0.084458	2.03127	normal	0.198982	2.14445	normal	0.0428186	3.63733	normal	0.699326	0.883547	normal	--	--	--	--	[K]	Transcription	Aft1 HRA domain;; Aft1 HRR domain;; Aft1 osmotic stress response (OSM) domain;; bZIP transcription factor;; Basic region leucine zipper	--	K	Transcription	bZIP transcription factor [Colletotrichum gloeosporioides Cg-14]	--	--
BMK_Unigene_014746	bZIP	TF	5.249	1.02043	0.429381	5.91137	0.77806	3.02639	0.0094379	-2.44621	down	0.0144659	-3.13577	normal	0.00602086	-2.45864	down	0.429327	-0.71632	normal	--	--	Molecular Function: sequence-specific DNA binding transcription factor activity (GO:0003700);; Biological Process: regulation of transcription, DNA-templated (GO:0006355);; Molecular Function: sequence-specific DNA binding (GO:0043565);;	--	--	--	bZIP transcription factor;; Basic region leucine zipper	Light-inducible protein CPRF2 GN=CPRF2 OS=Petroselinum crispum (Parsley) PE=2 SV=2	--	--	PREDICTED: light-inducible protein CPRF2-like isoform X3 [Setaria italica]	biological process: biological regulation (GO:0065007);; molecular function: nucleic acid binding transcription factor activity (GO:0001071);; molecular function: binding (GO:0005488)	--
BMK_Unigene_014784	bZIP	TF	1.22416	1.58053	1.39086	0.0182992	0.287347	0.0362019	0.614495	0.720016	normal	0.65547	0.766466	normal	0.668967	1.67784	normal	--	--	--	--	--	Molecular Function: sequence-specific DNA binding transcription factor activity (GO:0003700);; Biological Process: regulation of transcription, DNA-templated (GO:0006355);; Molecular Function: sequence-specific DNA binding (GO:0043565);;	--	--	--	bZIP transcription factor;; bZIP Maf transcription factor	--	--	--	putative bzip transcription factor protein [Togninia minima UCRPA7]	biological process: biological regulation (GO:0065007);; molecular function: nucleic acid binding transcription factor activity (GO:0001071);; molecular function: binding (GO:0005488)	--
BMK_Unigene_015305	bZIP	TF	0.383449	1.02935	3.9102	0	0	0.382	0.554266	1.49997	normal	0.33241	2.62075	normal	--	--	--	0.022879	3.69309	normal	--	--	Molecular Function: sequence-specific DNA binding transcription factor activity (GO:0003700);; Biological Process: regulation of transcription, DNA-templated (GO:0006355);; Molecular Function: sequence-specific DNA binding (GO:0043565);;	--	--	--	bZIP transcription factor;; Basic region leucine zipper	--	S	Function unknown	hypothetical protein FG05_09286 [Fusarium graminearum]	biological process: biological regulation (GO:0065007);; molecular function: nucleic acid binding transcription factor activity (GO:0001071);; molecular function: binding (GO:0005488)	--
BMK_Unigene_015936	bZIP	TF	16.0181	26.4976	30.9033	15.7609	27.6328	27.8895	0.00718951	1.08815	up	0.000571574	1.45322	up	0.0519843	1.07548	normal	0.000197787	1.18853	up	--	--	Molecular Function: sequence-specific DNA binding transcription factor activity (GO:0003700);; Cellular Component: nucleus (GO:0005634);; Biological Process: regulation of transcription, DNA-templated (GO:0006355);; Molecular Function: sequence-specific DNA binding (GO:0043565);;	--	--	--	bZIP transcription factor;; Basic region leucine zipper	Transcription factor RF2a OS=Oryza sativa subsp. japonica (Rice) PE=1 SV=1	K	Transcription	hypothetical protein SORBIDRAFT_02g029870 [Sorghum bicolor]	biological process: biological regulation (GO:0065007);; molecular function: nucleic acid binding transcription factor activity (GO:0001071);; cellular component: cell (GO:0005623);; cellular component: organelle (GO:0043226);; cellular component: cell part (GO:0044464);; molecular function: binding (GO:0005488)	--
BMK_Unigene_016440	bZIP	TF	44.0023	19.8071	23.8205	43.411	30.7113	35.3385	0.0814843	-0.771867	normal	0.59047	-0.359494	normal	0.760825	-0.21674	normal	0.893079	0.0851764	normal	--	--	Molecular Function: sequence-specific DNA binding transcription factor activity (GO:0003700);; Cellular Component: nucleus (GO:0005634);; Biological Process: regulation of transcription, DNA-templated (GO:0006355);; Molecular Function: sequence-specific DNA binding (GO:0043565);;	--	--	--	bZIP transcription factor;; Basic region leucine zipper;; Basic leucine-zipper C terminal;; Protein of unknown function (DUF632);; Protein of unknown function (DUF632);; Protein of unknown function (DUF632)	Basic leucine zipper 9 GN=F6A4.10 OS=Arabidopsis thaliana (Mouse-ear cress) PE=1 SV=1	--	--	PREDICTED: basic leucine zipper 9-like isoform X4 [Setaria italica]	biological process: biological regulation (GO:0065007);; molecular function: nucleic acid binding transcription factor activity (GO:0001071);; cellular component: cell (GO:0005623);; cellular component: organelle (GO:0043226);; cellular component: cell part (GO:0044464);; molecular function: binding (GO:0005488)	--
BMK_Unigene_016471	bZIP	TF	6.92284	13.1843	18.9838	8.29932	13.2174	10.8858	0.0125	1.41338	normal	0.000252251	2.06081	up	0.751897	0.473805	normal	0.803361	0.290523	normal	--	--	Molecular Function: sequence-specific DNA binding transcription factor activity (GO:0003700);; Molecular Function: transporter activity (GO:0005215);; Biological Process: regulation of transcription, DNA-templated (GO:0006355);; Biological Process: transport (GO:0006810);; Cellular Component: membrane (GO:0016020);; Molecular Function: sequence-specific DNA binding (GO:0043565);;	--	--	--	Basic region leucine zipper;; bZIP transcription factor	Transcription factor RF2b GN=RF2b OS=Oryza sativa subsp. japonica (Rice) PE=1 SV=1	--	--	hypothetical protein SORBIDRAFT_07g025270 [Sorghum bicolor]	biological process: biological regulation (GO:0065007);; molecular function: nucleic acid binding transcription factor activity (GO:0001071);; biological process: localization (GO:0051179);; molecular function: transporter activity (GO:0005215);; cellular component: membrane (GO:0016020);; molecular function: binding (GO:0005488)	--
BMK_Unigene_017110	bZIP	TF	15.2607	12.8711	12.1637	16.0537	16.5345	13.9506	0.968233	-0.0620148	normal	0.893375	0.20059	normal	0.989392	0.0261541	normal	0.699326	0.405124	normal	--	--	Molecular Function: sequence-specific DNA binding transcription factor activity (GO:0003700);; Cellular Component: nucleus (GO:0005634);; Biological Process: regulation of transcription, DNA-templated (GO:0006355);; Molecular Function: sequence-specific DNA binding (GO:0043565);;	K09060|2.88303e-153|sita:101753891|transcription factor HBP-1a-like; K09060 plant G-box-binding factor (A)	--	--	G-box binding protein MFMR;; bZIP transcription factor;; Basic region leucine zipper;; bZIP Maf transcription factor	Transcription factor HBP-1a OS=Triticum aestivum (Wheat) PE=2 SV=1	K	Transcription	PREDICTED: transcription factor HBP-1a-like [Setaria italica]	biological process: biological regulation (GO:0065007);; molecular function: nucleic acid binding transcription factor activity (GO:0001071);; cellular component: cell (GO:0005623);; cellular component: organelle (GO:0043226);; cellular component: cell part (GO:0044464);; molecular function: binding (GO:0005488)	--
BMK_Unigene_017303	bZIP	TF	24.3085	25.5515	22.8873	24.3356	23.2844	18.4183	0.489166	0.442342	normal	0.580541	0.432023	normal	0.82143	0.201782	normal	0.972123	-0.0314335	normal	--	--	Molecular Function: sequence-specific DNA binding transcription factor activity (GO:0003700);; Biological Process: regulation of transcription, DNA-templated (GO:0006355);; Molecular Function: sequence-specific DNA binding (GO:0043565);;	--	--	--	Basic region leucine zipper;; bZIP transcription factor;; bZIP Maf transcription factor	Transcription factor VIP1 GN=F2J6.6 OS=Arabidopsis thaliana (Mouse-ear cress) PE=1 SV=1	K	Transcription	PREDICTED: transcription factor VIP1-like [Setaria italica]	biological process: biological regulation (GO:0065007);; molecular function: nucleic acid binding transcription factor activity (GO:0001071);; molecular function: binding (GO:0005488)	--
BMK_Unigene_019398	bZIP	TF	4.63042	2.28338	1.10403	5.19857	5.6442	3.61502	0.60326	-0.61676	normal	0.159975	-1.4814	normal	0.751897	0.370467	normal	0.908726	-0.15316	normal	--	--	Molecular Function: sequence-specific DNA binding transcription factor activity (GO:0003700);; Biological Process: regulation of transcription, DNA-templated (GO:0006355);; Biological Process: response to zinc ion (GO:0010043);; Molecular Function: sequence-specific DNA binding (GO:0043565);;	--	--	--	Basic region leucine zipper;; bZIP transcription factor	--	K	Transcription	PREDICTED: uncharacterized protein LOC101762708 isoform X1 [Setaria italica]	biological process: biological regulation (GO:0065007);; molecular function: nucleic acid binding transcription factor activity (GO:0001071);; biological process: response to stimulus (GO:0050896);; molecular function: binding (GO:0005488)	--
BMK_Unigene_019486	bZIP	TF	49.9795	50.3191	36.1641	85.1192	42.7494	59.5402	0.538502	0.426562	normal	0.746564	-0.259341	normal	0.625726	-0.665123	normal	0.973845	0.0279866	normal	--	--	Molecular Function: sequence-specific DNA binding transcription factor activity (GO:0003700);; Biological Process: regulation of transcription, DNA-templated (GO:0006355);; Molecular Function: sulfotransferase activity (GO:0008146);; Molecular Function: sequence-specific DNA binding (GO:0043565);;	--	--	--	bZIP transcription factor;; Basic region leucine zipper	TGACG-sequence-specific DNA-binding protein TGA-1B (Fragment) GN=TGA1B OS=Nicotiana tabacum (Common tobacco) PE=2 SV=1	S	Function unknown	PREDICTED: uncharacterized protein LOC101774004 [Setaria italica]	biological process: biological regulation (GO:0065007);; molecular function: nucleic acid binding transcription factor activity (GO:0001071);; biological process: metabolic process (GO:0008152);; molecular function: catalytic activity (GO:0003824);; molecular function: binding (GO:0005488)	--
BMK_Unigene_020435	bZIP	TF	33.2067	38.2232	36.2632	45.7127	30.0428	24.5515	0.265056	0.57276	normal	0.312832	0.650916	normal	0.751897	-0.308201	normal	0.233277	-0.507459	normal	--	--	Molecular Function: sequence-specific DNA binding transcription factor activity (GO:0003700);; Biological Process: regulation of transcription, DNA-templated (GO:0006355);; Molecular Function: sequence-specific DNA binding (GO:0043565);;	K14431|0|sita:101774191|TGACG-sequence-specific DNA-binding protein TGA-2.1-like; K14431 transcription factor TGA (A)	--	--	Seed dormancy control;; bZIP transcription factor;; Basic region leucine zipper	TGACG-sequence-specific DNA-binding protein TGA-2.1 GN=TGA21 OS=Nicotiana tabacum (Common tobacco) PE=1 SV=1	K	Transcription	PREDICTED: TGACG-sequence-specific DNA-binding protein TGA-2.1-like isoform X1 [Setaria italica]	biological process: biological regulation (GO:0065007);; molecular function: nucleic acid binding transcription factor activity (GO:0001071);; molecular function: binding (GO:0005488)	Plant hormone signal transduction (ko04075)
BMK_Unigene_024284	bZIP	TF	5.45093	6.36153	5.10217	0	0.0486997	0	0.613943	0.587897	normal	0.687507	0.389361	normal	0.751897	0.861298	normal	--	--	--	--	--	--	--	[K]	Transcription	bZIP transcription factor;; Basic region leucine zipper	--	K	Transcription	Putative Cross-pathway control protein [Podospora anserina S mat+]	--	--
BMK_Unigene_029042	bZIP	TF	0.312869	0.375958	0.340592	0	0	1.48328	0.802654	0.551056	normal	0.834194	0.569787	normal	--	--	--	0.00128009	4.66388	up	--	--	--	--	--	--	bZIP transcription factor	--	K	Transcription	bZIP transcription factor [Colletotrichum fioriniae PJ7]	--	--
BMK_Unigene_032227	bZIP	TF	0.399323	0.333603	0.441092	0.37285	0.427474	0.552503	0.972145	0.0798387	normal	0.799112	0.588349	normal	0.838812	0.435999	normal	0.663742	0.856502	normal	--	--	--	--	[K]	Transcription	Jun-like transcription factor;; bZIP transcription factor;; Basic region leucine zipper;; bZIP Maf transcription factor	--	K	Transcription	hypothetical protein SEPMUDRAFT_147966 [Sphaerulina musiva SO2202]	--	--
BMK_Unigene_036300	bZIP	TF	2.48473	1.59702	1.3462	2.97475	1.86122	1.99443	0.802019	-0.254285	normal	0.782503	-0.326274	normal	0.840707	-0.34399	normal	0.893386	-0.177931	normal	--	--	Molecular Function: sequence-specific DNA binding transcription factor activity (GO:0003700);; Molecular Function: protein serine/threonine kinase activity (GO:0004674);; Molecular Function: GTPase activator activity (GO:0005096);; Biological Process: regulation of transcription, DNA-templated (GO:0006355);; Biological Process: protein phosphorylation (GO:0006468);; Biological Process: response t…	K14431|0|sita:101763586|TGACG-sequence-specific DNA-binding protein TGA-2.1-like; K14431 transcription factor TGA (A)	--	--	Seed dormancy control;; bZIP transcription factor;; Basic region leucine zipper	TGACG-sequence-specific DNA-binding protein TGA-2.1 GN=TGA21 OS=Nicotiana tabacum (Common tobacco) PE=1 SV=1	K	Transcription	PREDICTED: TGACG-sequence-specific DNA-binding protein TGA-2.1-like [Setaria italica]	biological process: biological regulation (GO:0065007);; molecular function: nucleic acid binding transcription factor activity (GO:0001071);; biological process: metabolic process (GO:0008152);; biological process: cellular process (GO:0009987);; molecular function: catalytic activity (GO:0003824);; molecular function: enzyme regulator activity (GO:0030234);; biological process: response to stim…	Plant hormone signal transduction (ko04075)
BMK_Unigene_036319	bZIP	TF	10.511	10.6784	6.74191	21.7932	25.3416	15.1594	0.60326	0.396293	normal	0.882555	-0.152183	normal	0.751897	0.486708	normal	0.95169	-0.105112	normal	--	--	Molecular Function: sequence-specific DNA binding transcription factor activity (GO:0003700);; Biological Process: regulation of transcription, DNA-templated (GO:0006355);; Molecular Function: sequence-specific DNA binding (GO:0043565);;	--	--	--	bZIP transcription factor;; Basic region leucine zipper	--	S	Function unknown	PREDICTED: ocs element-binding factor 1-like [Setaria italica]	biological process: biological regulation (GO:0065007);; molecular function: nucleic acid binding transcription factor activity (GO:0001071);; molecular function: binding (GO:0005488)	--
BMK_Unigene_037497	bZIP	TF	8.6407	1.19738	0.146217	3.23832	2.41287	0.259848	0.177051	-2.24564	normal	0.0091433	-4.88466	down	0.779847	-0.748977	normal	0.699326	-1.0829	normal	--	--	Molecular Function: sequence-specific DNA binding transcription factor activity (GO:0003700);; Cellular Component: nucleus (GO:0005634);; Biological Process: regulation of transcription, DNA-templated (GO:0006355);; Molecular Function: sequence-specific DNA binding (GO:0043565);;	--	--	--	bZIP transcription factor;; Basic region leucine zipper	Protein FD OS=Arabidopsis thaliana (Mouse-ear cress) PE=1 SV=1	K	Transcription	PREDICTED: transcription factor PERIANTHIA-like isoform X2 [Setaria italica]	biological process: biological regulation (GO:0065007);; molecular function: nucleic acid binding transcription factor activity (GO:0001071);; cellular component: cell (GO:0005623);; cellular component: organelle (GO:0043226);; cellular component: cell part (GO:0044464);; molecular function: binding (GO:0005488)	--
BMK_Unigene_037662	bZIP	TF	5.03014	2.99838	0.61993	0.209682	0.0108757	0	0.902764	-0.312251	normal	0.00953611	-2.36058	down	0.694473	-1.62028	normal	0.305654	-2.27698	normal	--	--	Molecular Function: sequence-specific DNA binding transcription factor activity (GO:0003700);; Biological Process: regulation of transcription, DNA-templated (GO:0006355);; Molecular Function: sequence-specific DNA binding (GO:0043565);;	--	--	--	bZIP transcription factor;; Basic region leucine zipper	--	S	Function unknown	hypothetical protein PHYSODRAFT_355946 [Phytophthora sojae]	biological process: biological regulation (GO:0065007);; molecular function: nucleic acid binding transcription factor activity (GO:0001071);; molecular function: binding (GO:0005488)	--
BMK_Unigene_038146	bZIP	TF	1.79512	0.655094	0.926875	1.41614	0.729815	0.135146	0.521213	-1.02355	normal	0.777002	-0.411216	normal	0.751897	-0.595728	normal	0.0878571	-2.42272	normal	--	--	Molecular Function: sequence-specific DNA binding transcription factor activity (GO:0003700);; Biological Process: regulation of transcription, DNA-templated (GO:0006355);; Molecular Function: sequence-specific DNA binding (GO:0043565);;	--	--	--	Basic region leucine zipper;; bZIP transcription factor	--	K	Transcription	PREDICTED: uncharacterized protein LOC101767291 [Setaria italica]	biological process: biological regulation (GO:0065007);; molecular function: nucleic acid binding transcription factor activity (GO:0001071);; molecular function: binding (GO:0005488)	--
BMK_Unigene_039895	bZIP	TF	11.6157	0.820482	0.354606	18.4052	2.01551	2.00923	9.28407e-10	-4.26309	down	3.99071e-08	-4.87661	down	9.9685e-05	-2.75604	down	5.50169e-16	-3.54106	down	--	--	Molecular Function: sequence-specific DNA binding transcription factor activity (GO:0003700);; Biological Process: regulation of transcription, DNA-templated (GO:0006355);; Molecular Function: sequence-specific DNA binding (GO:0043565);;	--	--	--	bZIP transcription factor;; Basic leucine-zipper C terminal;; Basic region leucine zipper	Light-inducible protein CPRF2 GN=CPRF2 OS=Petroselinum crispum (Parsley) PE=2 SV=2	S	Function unknown	PREDICTED: light-inducible protein CPRF2-like isoform X1 [Setaria italica]	biological process: biological regulation (GO:0065007);; molecular function: nucleic acid binding transcription factor activity (GO:0001071);; molecular function: binding (GO:0005488)	--
BMK_Unigene_040044	bZIP	TF	14.0372	10.8064	14.1246	5.98279	11.1614	7.13673	0.997506	0.00228495	normal	0.471188	0.509744	normal	0.055589	1.14393	normal	0.381548	0.621431	normal	--	--	Molecular Function: sequence-specific DNA binding transcription factor activity (GO:0003700);; Biological Process: regulation of transcription, DNA-templated (GO:0006355);; Molecular Function: sequence-specific DNA binding (GO:0043565);;	K14432|2.48452e-115|sita:101776070|ABSCISIC ACID-INSENSITIVE 5-like protein 5-like; K14432 ABA responsive element binding factor (A)	--	--	bZIP transcription factor;; Basic region leucine zipper;; bZIP Maf transcription factor	bZIP transcription factor TRAB1 OS=Oryza sativa subsp. japonica (Rice) PE=1 SV=1	K	Transcription	PREDICTED: ABSCISIC ACID-INSENSITIVE 5-like protein 5-like [Setaria italica]	biological process: biological regulation (GO:0065007);; molecular function: nucleic acid binding transcription factor activity (GO:0001071);; molecular function: binding (GO:0005488)	Plant hormone signal transduction (ko04075)
BMK_Unigene_040073	bZIP	TF	14.1124	36.9466	38.01	8.19583	29.9817	14.2562	7.38806e-05	2.23302	up	0.00105528	2.37314	up	0.00040436	2.70998	up	0.0362153	1.31038	normal	--	--	Molecular Function: sequence-specific DNA binding transcription factor activity (GO:0003700);; Biological Process: regulation of transcription, DNA-templated (GO:0006355);; Molecular Function: sequence-specific DNA binding (GO:0043565);;	K14432|4.64382e-119|sbi:SORBI_04g034190|SORBIDRAFT_04g034190, Sb04g034190; hypothetical protein; K14432 ABA responsive element binding factor (A)	--	--	bZIP transcription factor;; Basic region leucine zipper	ABSCISIC ACID-INSENSITIVE 5-like protein 7 GN=MVI11.7 OS=Arabidopsis thaliana (Mouse-ear cress) PE=1 SV=1	K	Transcription	PREDICTED: ABSCISIC ACID-INSENSITIVE 5-like protein 7-like isoform X2 [Setaria italica]	biological process: biological regulation (GO:0065007);; molecular function: nucleic acid binding transcription factor activity (GO:0001071);; molecular function: binding (GO:0005488)	Plant hormone signal transduction (ko04075)
BMK_Unigene_040196	bZIP	TF	64.0145	112.584	37.35	41.6463	66.6336	35.7247	0.39573	0.749279	normal	0.650012	-0.599806	normal	0.256384	0.801533	normal	0.998736	0.00101173	normal	--	--	Molecular Function: sequence-specific DNA binding transcription factor activity (GO:0003700);; Biological Process: regulation of transcription, DNA-templated (GO:0006355);; Cellular Component: plastid (GO:0009536);; Molecular Function: sequence-specific DNA binding (GO:0043565);;	--	--	--	bZIP transcription factor;; Basic region leucine zipper	Basic leucine zipper 9 GN=F6A4.10 OS=Arabidopsis thaliana (Mouse-ear cress) PE=1 SV=1	S	Function unknown	PREDICTED: basic leucine zipper 9-like isoform X1 [Setaria italica]	biological process: biological regulation (GO:0065007);; molecular function: nucleic acid binding transcription factor activity (GO:0001071);; cellular component: cell (GO:0005623);; cellular component: organelle (GO:0043226);; cellular component: cell part (GO:0044464);; molecular function: binding (GO:0005488)	--
BMK_Unigene_041327	bZIP	TF	70.931	85.2062	78.6071	82.0848	100.049	49.3553	0.268697	0.648754	normal	0.452383	0.711124	normal	0.581942	0.593391	normal	0.699326	-0.285075	normal	--	--	Biological Process: MAPK cascade (GO:0000165);; Biological Process: respiratory burst involved in defense response (GO:0002679);; Molecular Function: sequence-specific DNA binding transcription factor activity (GO:0003700);; Cellular Component: endoplasmic reticulum membrane (GO:0005789);; Biological Process: regulation of transcription, DNA-templated (GO:0006355);; Biological Process: protein ta…	--	--	--	bZIP transcription factor;; Basic region leucine zipper	bZIP transcription factor 60 GN=BZIP60 OS=Arabidopsis thaliana (Mouse-ear cress) PE=2 SV=1	K	Transcription	PREDICTED: bZIP transcription factor 60-like [Setaria italica]	biological process: metabolic process (GO:0008152);; biological process: cellular process (GO:0009987);; biological process: signaling (GO:0023052);; biological process: single-organism process (GO:0044699);; biological process: response to stimulus (GO:0050896);; biological process: biological regulation (GO:0065007);; biological process: immune system process (GO:0002376);; molecular function: …	--
BMK_Unigene_041895	bZIP	TF	16.3423	51.2607	41.389	23.19	37.1398	58.976	0.00601799	1.91796	up	0.0577868	1.66625	normal	0.768536	0.38954	normal	0.064387	1.2824	normal	--	--	Molecular Function: sequence-specific DNA binding transcription factor activity (GO:0003700);; Cellular Component: nucleus (GO:0005634);; Biological Process: regulation of transcription, DNA-templated (GO:0006355);; Molecular Function: sequence-specific DNA binding (GO:0043565);;	--	--	--	Basic leucine-zipper C terminal;; bZIP transcription factor;; Basic region leucine zipper	Light-inducible protein CPRF2 GN=CPRF2 OS=Petroselinum crispum (Parsley) PE=2 SV=2	K	Transcription	PREDICTED: light-inducible protein CPRF2-like [Setaria italica]	biological process: biological regulation (GO:0065007);; molecular function: nucleic acid binding transcription factor activity (GO:0001071);; cellular component: cell (GO:0005623);; cellular component: organelle (GO:0043226);; cellular component: cell part (GO:0044464);; molecular function: binding (GO:0005488)	--
BMK_Unigene_042395	bZIP	TF	5.18228	1.82421	2.74621	4.78381	1.84971	4.43198	0.799771	-0.364335	normal	0.65547	-0.565425	normal	0.592434	-1.17977	normal	0.929073	-0.157608	normal	--	--	Molecular Function: sequence-specific DNA binding transcription factor activity (GO:0003700);; Cellular Component: mitochondrion (GO:0005739);; Biological Process: regulation of transcription, DNA-templated (GO:0006355);; Molecular Function: sequence-specific DNA binding (GO:0043565);;	--	--	--	bZIP transcription factor;; Basic region leucine zipper	Basic leucine zipper 43 GN=BZIP43 OS=Arabidopsis thaliana (Mouse-ear cress) PE=1 SV=1	S	Function unknown	PREDICTED: G-box-binding factor 1-like [Setaria italica]	biological process: biological regulation (GO:0065007);; molecular function: nucleic acid binding transcription factor activity (GO:0001071);; cellular component: cell (GO:0005623);; cellular component: organelle (GO:0043226);; cellular component: cell part (GO:0044464);; molecular function: binding (GO:0005488)	--
BMK_Unigene_042882	bZIP	TF	57.5557	397.283	284.253	57.5319	195.506	391.949	2.18294e-16	3.22488	up	5.05364e-08	2.5902	up	0.0416171	1.97417	normal	4.24036e-06	2.89672	up	--	--	Molecular Function: sequence-specific DNA binding transcription factor activity (GO:0003700);; Cellular Component: nucleus (GO:0005634);; Biological Process: regulation of transcription, DNA-templated (GO:0006355);; Molecular Function: sequence-specific DNA binding (GO:0043565);;	--	--	--	bZIP transcription factor;; Basic region leucine zipper;; bZIP Maf transcription factor	Basic leucine zipper 9 GN=F6A4.10 OS=Arabidopsis thaliana (Mouse-ear cress) PE=1 SV=1	S	Function unknown	PREDICTED: basic leucine zipper 9-like [Setaria italica]	biological process: biological regulation (GO:0065007);; molecular function: nucleic acid binding transcription factor activity (GO:0001071);; cellular component: cell (GO:0005623);; cellular component: organelle (GO:0043226);; cellular component: cell part (GO:0044464);; molecular function: binding (GO:0005488)	--
BMK_Unigene_043039	bZIP	TF	12.0373	8.75835	8.05467	10.5526	9.16785	7.61211	0.889163	-0.10844	normal	0.953918	0.0610102	normal	0.851787	0.198367	normal	0.977226	-0.0288455	normal	--	--	Molecular Function: sequence-specific DNA binding transcription factor activity (GO:0003700);; Biological Process: regulation of transcription, DNA-templated (GO:0006355);; Molecular Function: sequence-specific DNA binding (GO:0043565);;	K14432|5.33536e-47|sita:101758063|G-box-binding factor 4-like; K14432 ABA responsive element binding factor (A)	--	--	bZIP transcription factor;; Basic region leucine zipper	G-box-binding factor 4 GN=F21M11.10 OS=Arabidopsis thaliana (Mouse-ear cress) PE=1 SV=1	K	Transcription	PREDICTED: G-box-binding factor 4-like isoform X1 [Setaria italica]	biological process: biological regulation (GO:0065007);; molecular function: nucleic acid binding transcription factor activity (GO:0001071);; molecular function: binding (GO:0005488)	Plant hormone signal transduction (ko04075)
BMK_Unigene_045175	bZIP	TF	24.3521	7.74497	11.8975	15.8773	9.3691	8.47837	0.002563	-2.09799	down	0.0165729	-1.72139	normal	0.728062	-0.80423	normal	0.693011	-0.602966	normal	--	--	Molecular Function: sequence-specific DNA binding transcription factor activity (GO:0003700);; Biological Process: regulation of transcription, DNA-templated (GO:0006355);; Molecular Function: sequence-specific DNA binding (GO:0043565);;	K14432|0|zma:100501609|putative bZIP transcription factor superfamily protein isoform 1; K14432 ABA responsive element binding factor (A)	--	--	bZIP transcription factor;; Basic region leucine zipper	ABSCISIC ACID-INSENSITIVE 5-like protein 2 GN=T8M16_180 OS=Arabidopsis thaliana (Mouse-ear cress) PE=1 SV=1	K	Transcription	PREDICTED: ABSCISIC ACID-INSENSITIVE 5-like protein 2-like isoform X2 [Setaria italica]	biological process: biological regulation (GO:0065007);; molecular function: nucleic acid binding transcription factor activity (GO:0001071);; molecular function: binding (GO:0005488)	Plant hormone signal transduction (ko04075)
BMK_Unigene_045930	bZIP	TF	7.40324	0.767025	1.63155	4.08495	3.57372	2.61149	0.000415704	-2.70922	down	0.0266918	-1.66597	normal	0.99174	0.0268587	normal	0.88282	-0.204588	normal	--	--	Molecular Function: double-stranded DNA binding (GO:0003690);; Molecular Function: sequence-specific DNA binding transcription factor activity (GO:0003700);; Cellular Component: nucleus (GO:0005634);; Biological Process: regulation of transcription, DNA-templated (GO:0006355);; Biological Process: response to abscisic acid (GO:0009737);; Biological Process: gibberellic acid mediated signaling pat…	K16241|5.07488e-69|sita:101760850|transcription factor HY5-like; K16241 transcription factor HY5 (A)	[K]	Transcription	bZIP transcription factor;; Basic region leucine zipper	Transcription factor HY5 GN=HY5 OS=Solanum lycopersicum (Tomato) PE=2 SV=1	--	--	PREDICTED: transcription factor HY5-like [Setaria italica]	molecular function: binding (GO:0005488);; biological process: biological regulation (GO:0065007);; molecular function: nucleic acid binding transcription factor activity (GO:0001071);; cellular component: cell (GO:0005623);; cellular component: organelle (GO:0043226);; cellular component: cell part (GO:0044464);; biological process: response to stimulus (GO:0050896);; biological process: cellula…	Circadian rhythm - plant (ko04712)
BMK_Unigene_046399	bZIP	TF	0.449701	0.365267	1.78788	0.0257654	0.0388486	1.11284	0.871726	-0.470474	normal	0.0932191	2.89539	normal	0.987796	0.0512719	normal	0.0194471	3.62956	normal	--	--	--	--	--	--	Basic region leucine zipper	--	K	Transcription	transcriptional activator hac1 [Colletotrichum higginsianum]	--	--
BMK_Unigene_046602	bZIP	TF	39.3961	18.478	16.8063	48.4938	22.6452	27.0312	0.60326	-0.402675	normal	0.61227	-0.462077	normal	0.592434	-0.767318	normal	0.341243	-0.643556	normal	--	--	Molecular Function: sequence-specific DNA binding transcription factor activity (GO:0003700);; Cellular Component: mitochondrion (GO:0005739);; Biological Process: regulation of transcription, DNA-templated (GO:0006355);; Molecular Function: sequence-specific DNA binding (GO:0043565);;	K14431|0|sita:101755908|transcription factor HBP-1b(c1)-like; K14431 transcription factor TGA (A)	--	--	Seed dormancy control;; bZIP transcription factor;; Basic region leucine zipper	TGACG-sequence-specific DNA-binding protein TGA-2.1 GN=TGA21 OS=Nicotiana tabacum (Common tobacco) PE=1 SV=1	--	--	PREDICTED: transcription factor HBP-1b(c1)-like isoform X2 [Setaria italica]	biological process: biological regulation (GO:0065007);; molecular function: nucleic acid binding transcription factor activity (GO:0001071);; cellular component: cell (GO:0005623);; cellular component: organelle (GO:0043226);; cellular component: cell part (GO:0044464);; molecular function: binding (GO:0005488)	Plant hormone signal transduction (ko04075)
BMK_Unigene_046985	bZIP	TF	0.390744	0.271716	0.956365	0	0.0704693	2.53019	0.964673	-0.130672	normal	0.57949	1.53381	normal	0.751897	1.11758	normal	8.4733e-06	5.70703	up	--	--	Molecular Function: sequence-specific DNA binding transcription factor activity (GO:0003700);; Biological Process: regulation of transcription, DNA-templated (GO:0006355);; Molecular Function: sequence-specific DNA binding (GO:0043565);;	--	--	--	bZIP transcription factor;; Basic region leucine zipper	--	--	--	bZIP transcription factor [Colletotrichum gloeosporioides Nara gc5]	biological process: biological regulation (GO:0065007);; molecular function: nucleic acid binding transcription factor activity (GO:0001071);; molecular function: binding (GO:0005488)	--
BMK_Unigene_047238	bZIP	TF	70.9142	42.6285	48.6946	42.2159	83.7311	72.5046	0.411863	-0.644118	normal	0.570314	-0.695379	normal	0.896469	0.164495	normal	0.932681	0.0959532	normal	--	--	Molecular Function: sequence-specific DNA binding transcription factor activity (GO:0003700);; Biological Process: regulation of transcription, DNA-templated (GO:0006355);; Cellular Component: plastid (GO:0009536);; Molecular Function: sequence-specific DNA binding (GO:0043565);;	--	--	--	bZIP transcription factor;; Basic region leucine zipper	--	K	Transcription	PREDICTED: ocs element-binding factor 1-like [Setaria italica]	biological process: biological regulation (GO:0065007);; molecular function: nucleic acid binding transcription factor activity (GO:0001071);; cellular component: cell (GO:0005623);; cellular component: organelle (GO:0043226);; cellular component: cell part (GO:0044464);; molecular function: binding (GO:0005488)	--
BMK_Unigene_047243	bZIP	TF	45.0913	58.6208	59.9371	41.2744	59.6237	51.2374	0.0480265	0.974	normal	0.00389859	1.67822	up	0.147992	0.800296	normal	0.121227	0.658915	normal	--	--	Molecular Function: sequence-specific DNA binding transcription factor activity (GO:0003700);; Cellular Component: nucleus (GO:0005634);; Cellular Component: cytoplasm (GO:0005737);; Biological Process: regulation of transcription, DNA-templated (GO:0006355);; Biological Process: response to xenobiotic stimulus (GO:0009410);; Biological Process: systemic acquired resistance (GO:0009627);; Biologi…	K14431|1.38615e-177|sita:101767398|transcription factor HBP-1b(c38)-like; K14431 transcription factor TGA (A)	--	--	Seed dormancy control;; bZIP transcription factor;; Basic region leucine zipper	Transcription factor HBP-1b(c38) OS=Triticum aestivum (Wheat) PE=2 SV=1	K	Transcription	PREDICTED: transcription factor HBP-1b(c38)-like isoform X4 [Setaria italica]	biological process: biological regulation (GO:0065007);; molecular function: nucleic acid binding transcription factor activity (GO:0001071);; cellular component: cell (GO:0005623);; cellular component: organelle (GO:0043226);; cellular component: cell part (GO:0044464);; biological process: response to stimulus (GO:0050896);; biological process: immune system process (GO:0002376);; biological pr…	Plant hormone signal transduction (ko04075)
BMK_Unigene_047792	bZIP	TF	8.09667	10.115	13.6744	10.8706	11.7438	12.6384	0.89286	-0.188632	normal	0.579298	0.792114	normal	0.779822	-0.440377	normal	0.811874	-0.315768	normal	--	--	Molecular Function: sequence-specific DNA binding transcription factor activity (GO:0003700);; Biological Process: regulation of transcription, DNA-templated (GO:0006355);; Molecular Function: sulfotransferase activity (GO:0008146);; Molecular Function: sequence-specific DNA binding (GO:0043565);;	--	--	--	bZIP transcription factor;; Basic region leucine zipper	TGACG-sequence-specific DNA-binding protein TGA-1B (Fragment) GN=TGA1B OS=Nicotiana tabacum (Common tobacco) PE=2 SV=1	S	Function unknown	PREDICTED: uncharacterized protein LOC101774004 [Setaria italica]	biological process: biological regulation (GO:0065007);; molecular function: nucleic acid binding transcription factor activity (GO:0001071);; biological process: metabolic process (GO:0008152);; molecular function: catalytic activity (GO:0003824);; molecular function: binding (GO:0005488)	--
BMK_Unigene_047951	bZIP	TF	4.40541	3.27367	4.23302	4.09575	3.08478	2.37008	0.679177	-0.610681	normal	0.967555	0.0863114	normal	0.862265	-0.451029	normal	0.41336	-1.44496	normal	--	--	Molecular Function: sequence-specific DNA binding transcription factor activity (GO:0003700);; Biological Process: regulation of transcription, DNA-templated (GO:0006355);; Molecular Function: sequence-specific DNA binding (GO:0043565);;	K14431|0|sbi:SORBI_02g018870|SORBIDRAFT_02g018870, Sb02g018870; hypothetical protein; K14431 transcription factor TGA (A)	--	--	Seed dormancy control;; bZIP transcription factor;; Basic region leucine zipper	TGACG-sequence-specific DNA-binding protein TGA-2.1 GN=TGA21 OS=Nicotiana tabacum (Common tobacco) PE=1 SV=1	S	Function unknown	hypothetical protein SORBIDRAFT_02g018870 [Sorghum bicolor]	biological process: biological regulation (GO:0065007);; molecular function: nucleic acid binding transcription factor activity (GO:0001071);; molecular function: binding (GO:0005488)	Plant hormone signal transduction (ko04075)
BMK_Unigene_047957	bZIP	TF	4.12949	4.86115	4.08312	0.328015	2.88416	0.999635	0.60326	0.864761	normal	0.458579	1.61547	normal	0.49309	2.06777	normal	--	--	--	--	--	--	--	--	--	bZIP transcription factor;; Basic region leucine zipper	--	S	Function unknown	PREDICTED: ocs element-binding factor 1-like [Setaria italica]	--	--
BMK_Unigene_048544	bZIP	TF	25.0052	16.6583	9.41357	20.586	11.539	13.069	0.617334	-0.560479	normal	0.231459	-1.91682	normal	0.703958	-0.722974	normal	0.273399	-1.0463	normal	--	--	Molecular Function: sequence-specific DNA binding transcription factor activity (GO:0003700);; Cellular Component: nucleus (GO:0005634);; Biological Process: regulation of transcription, DNA-templated (GO:0006355);; Molecular Function: sequence-specific DNA binding (GO:0043565);;	K09060|2.79556e-76|sita:101784853|transcription factor HBP-1a-like; K09060 plant G-box-binding factor (A)	--	--	bZIP transcription factor;; Basic region leucine zipper	Transcription factor HBP-1a OS=Triticum aestivum (Wheat) PE=2 SV=1	K	Transcription	PREDICTED: transcription factor HBP-1a-like isoform X1 [Setaria italica]	biological process: biological regulation (GO:0065007);; molecular function: nucleic acid binding transcription factor activity (GO:0001071);; cellular component: cell (GO:0005623);; cellular component: organelle (GO:0043226);; cellular component: cell part (GO:0044464);; molecular function: binding (GO:0005488)	--
BMK_Unigene_049070	bZIP	TF	20.5372	32.184	23.9225	13.1664	29.1627	26.5204	0.0623836	1.29757	normal	0.374226	0.961274	normal	0.428889	1.02083	normal	0.203625	1.03341	normal	--	--	Molecular Function: sequence-specific DNA binding transcription factor activity (GO:0003700);; Cellular Component: nucleus (GO:0005634);; Biological Process: regulation of transcription, DNA-templated (GO:0006355);; Molecular Function: sequence-specific DNA binding (GO:0043565);;	K14432|6.89747e-70|sbi:SORBI_03g040970|SORBIDRAFT_03g040970, Sb03g040970; hypothetical protein; K14432 ABA responsive element binding factor (A)	--	--	bZIP transcription factor;; Basic region leucine zipper	G-box-binding factor 4 GN=F21M11.10 OS=Arabidopsis thaliana (Mouse-ear cress) PE=1 SV=1	K	Transcription	hypothetical protein SORBIDRAFT_03g040970 [Sorghum bicolor]	biological process: biological regulation (GO:0065007);; molecular function: nucleic acid binding transcription factor activity (GO:0001071);; cellular component: cell (GO:0005623);; cellular component: organelle (GO:0043226);; cellular component: cell part (GO:0044464);; molecular function: binding (GO:0005488)	Plant hormone signal transduction (ko04075)
BMK_Unigene_049285	bZIP	TF	18.7967	26.1249	24.4141	15.1141	20.6634	13.1716	0.0852897	0.83979	normal	0.146016	0.890679	normal	0.196248	0.720457	normal	0.734795	0.175373	normal	--	--	Molecular Function: sequence-specific DNA binding transcription factor activity (GO:0003700);; Cellular Component: nucleus (GO:0005634);; Cellular Component: cytoplasm (GO:0005737);; Biological Process: regulation of transcription, DNA-templated (GO:0006355);; Biological Process: response to xenobiotic stimulus (GO:0009410);; Biological Process: systemic acquired resistance (GO:0009627);; Biologi…	K14431|1.58603e-172|sita:101767047|transcription factor HBP-1b(c1)-like; K14431 transcription factor TGA (A)	--	--	Seed dormancy control;; bZIP transcription factor;; Basic region leucine zipper	Transcription factor HBP-1b(c38) OS=Triticum aestivum (Wheat) PE=2 SV=1	K	Transcription	PREDICTED: transcription factor HBP-1b(c1)-like isoform X1 [Setaria italica]	biological process: biological regulation (GO:0065007);; molecular function: nucleic acid binding transcription factor activity (GO:0001071);; cellular component: cell (GO:0005623);; cellular component: organelle (GO:0043226);; cellular component: cell part (GO:0044464);; biological process: response to stimulus (GO:0050896);; biological process: immune system process (GO:0002376);; biological pr…	Plant hormone signal transduction (ko04075)
BMK_Unigene_049298	bZIP	TF	17.3384	14.1242	13.4962	16.9569	17.445	14.4108	0.374971	-0.816614	normal	0.75003	-0.307303	normal	0.996165	0.00867921	normal	0.972123	0.0524445	normal	--	--	Molecular Function: sequence-specific DNA binding transcription factor activity (GO:0003700);; Cellular Component: nucleus (GO:0005634);; Biological Process: regulation of transcription, DNA-templated (GO:0006355);; Molecular Function: sequence-specific DNA binding (GO:0043565);;	K09060|4.91098e-150|sita:101753891|transcription factor HBP-1a-like; K09060 plant G-box-binding factor (A)	--	--	G-box binding protein MFMR;; bZIP transcription factor;; Basic region leucine zipper;; bZIP Maf transcription factor	Transcription factor HBP-1a OS=Triticum aestivum (Wheat) PE=2 SV=1	K	Transcription	PREDICTED: transcription factor HBP-1a-like [Setaria italica]	biological process: biological regulation (GO:0065007);; molecular function: nucleic acid binding transcription factor activity (GO:0001071);; cellular component: cell (GO:0005623);; cellular component: organelle (GO:0043226);; cellular component: cell part (GO:0044464);; molecular function: binding (GO:0005488)	--
BMK_Unigene_050518	bZIP	TF	4.49753	8.37585	8.58321	7.43391	6.71919	5.07171	0.60326	1.11243	normal	0.846955	0.477158	normal	0.751897	-0.918271	normal	0.710533	-0.616453	normal	--	--	Molecular Function: sequence-specific DNA binding transcription factor activity (GO:0003700);; Biological Process: regulation of transcription, DNA-templated (GO:0006355);; Molecular Function: sequence-specific DNA binding (GO:0043565);;	K14431|9.97548e-110|sita:101782038|transcription factor TGA2-like; K14431 transcription factor TGA (A)	--	--	Seed dormancy control;; bZIP transcription factor;; Basic region leucine zipper	Transcription factor TGA5 GN=MOJ9.13 OS=Arabidopsis thaliana (Mouse-ear cress) PE=1 SV=2	S	Function unknown	PREDICTED: transcription factor TGA2-like isoform X1 [Setaria italica]	biological process: biological regulation (GO:0065007);; molecular function: nucleic acid binding transcription factor activity (GO:0001071);; molecular function: binding (GO:0005488)	Plant hormone signal transduction (ko04075)
BMK_Unigene_052032	bZIP	TF	63.7387	40.7014	51.563	58.8353	43.1791	47.4236	0.781582	-0.190363	normal	0.942718	0.0788561	normal	0.966067	0.0765938	normal	0.93318	-0.0883767	normal	--	--	Molecular Function: sequence-specific DNA binding transcription factor activity (GO:0003700);; Biological Process: regulation of transcription, DNA-templated (GO:0006355);; Biological Process: response to cold (GO:0009409);; Biological Process: systemic acquired resistance, salicylic acid mediated signaling pathway (GO:0009862);; Biological Process: defense response to bacterium (GO:0042742);; Mo…	K14431|1.15715e-166|sita:101781674|transcription factor TGA4-like; K14431 transcription factor TGA (A)	--	--	Seed dormancy control;; bZIP transcription factor;; Basic region leucine zipper	Transcription factor TGA4 GN=T31P16_20 OS=Arabidopsis thaliana (Mouse-ear cress) PE=1 SV=2	K	Transcription	PREDICTED: transcription factor TGA4-like isoform X1 [Setaria italica]	biological process: biological regulation (GO:0065007);; molecular function: nucleic acid binding transcription factor activity (GO:0001071);; biological process: response to stimulus (GO:0050896);; biological process: immune system process (GO:0002376);; biological process: cellular process (GO:0009987);; biological process: signaling (GO:0023052);; biological process: single-organism process (G…	Plant hormone signal transduction (ko04075)
BMK_Unigene_062447	bZIP	TF	2.94279	3.19636	5.69925	0	0.0358767	0	0.649727	0.488675	normal	0.287132	1.35115	normal	0.751897	0.786137	normal	--	--	--	--	--	Molecular Function: sequence-specific DNA binding transcription factor activity (GO:0003700);; Biological Process: regulation of transcription, DNA-templated (GO:0006355);; Molecular Function: sequence-specific DNA binding (GO:0043565);;	--	--	--	bZIP transcription factor;; Basic region leucine zipper	--	S	Function unknown	hypothetical protein NCU08055 [Neurospora crassa OR74A]	biological process: biological regulation (GO:0065007);; molecular function: nucleic acid binding transcription factor activity (GO:0001071);; molecular function: binding (GO:0005488)	--
BMK_Unigene_066443	bZIP	TF	0.262507	0	0	0.11865	0	0	0.613943	-1.29635	normal	0.65547	-1.18975	normal	--	--	--	--	--	--	--	--	--	--	--	--	bZIP transcription factor;; Basic region leucine zipper	--	--	--	--	--	--
BMK_Unigene_068648	bZIP	TF	0.219714	0	0	0.310982	0	0	0.613943	-1.27633	normal	0.65547	-1.16978	normal	0.751897	-0.804111	normal	0.699326	-0.872999	normal	--	--	Molecular Function: sequence-specific DNA binding transcription factor activity (GO:0003700);; Biological Process: regulation of transcription, DNA-templated (GO:0006355);; Molecular Function: sequence-specific DNA binding (GO:0043565);;	--	--	--	bZIP transcription factor;; Basic region leucine zipper	--	S	Function unknown	hypothetical protein PHYSODRAFT_284177 [Phytophthora sojae]	biological process: biological regulation (GO:0065007);; molecular function: nucleic acid binding transcription factor activity (GO:0001071);; molecular function: binding (GO:0005488)	--
BMK_Unigene_072162	bZIP	TF	0.221441	0	0	0.688436	0.651242	1.79641	0.28173	-2.90837	normal	0.363227	-2.68344	normal	0.976284	0.150869	normal	0.236923	1.54251	normal	--	--	Molecular Function: sequence-specific DNA binding transcription factor activity (GO:0003700);; Biological Process: regulation of transcription, DNA-templated (GO:0006355);; Molecular Function: sequence-specific DNA binding (GO:0043565);;	--	--	--	bZIP transcription factor	--	S	Function unknown	hypothetical protein SNOG_00166 [Phaeosphaeria nodorum SN15]	biological process: biological regulation (GO:0065007);; molecular function: nucleic acid binding transcription factor activity (GO:0001071);; molecular function: binding (GO:0005488)	--
BMK_Unigene_074035	bZIP	TF	0.350864	0.979774	0.961279	0.061094	0.029928	3.9042	0.214937	1.73372	normal	0.184896	1.85928	normal	0.951733	-0.270564	normal	1.04628e-05	4.99401	up	--	--	Molecular Function: sequence-specific DNA binding transcription factor activity (GO:0003700);; Biological Process: regulation of transcription, DNA-templated (GO:0006355);; Molecular Function: sequence-specific DNA binding (GO:0043565);;	--	--	--	bZIP transcription factor	--	S	Function unknown	bZIP transcription factor [Colletotrichum fioriniae PJ7]	biological process: biological regulation (GO:0065007);; molecular function: nucleic acid binding transcription factor activity (GO:0001071);; molecular function: binding (GO:0005488)	--
BMK_Unigene_074108	bZIP	TF	1.94855	1.39705	2.20203	0.0693401	0.0511298	9.26838	0.964584	-0.0837544	normal	0.690627	0.676266	normal	0.987796	-0.0604765	normal	0.536597	1.62164	normal	--	--	--	--	[K]	Transcription	bZIP transcription factor;; Basic region leucine zipper	--	K	Transcription	cross-pathway control protein [Verticillium alfalfae VaMs.102]	--	--
BMK_Unigene_074413	bZIP	TF	0.0587581	6.13913	0.349472	0	0.506487	0.0572861	0.549673	1.95626	normal	--	--	--	--	--	--	--	--	--	--	--	--	--	--	--	bZIP transcription factor;; Basic region leucine zipper	--	S	Function unknown	BZIP transcription factor [Rhizoctonia solani 123E]	--	--
BMK_Unigene_075041	bZIP	TF	2.95946	3.11071	1.93119	0.171292	0.546212	0.0212398	0.848731	0.330332	normal	0.650012	-1.00125	normal	0.751897	1.48145	normal	0.953963	-0.194163	normal	--	--	--	--	--	--	bZIP transcription factor	--	S	Function unknown	hypothetical protein FG05_12170 [Fusarium graminearum]	--	--
BMK_Unigene_081248	bZIP	TF	0.494052	0	0	0.09739	0	0	0.60326	-1.61688	normal	0.650012	-1.49102	normal	--	--	--	--	--	--	--	--	Molecular Function: sequence-specific DNA binding transcription factor activity (GO:0003700);; Cellular Component: nucleus (GO:0005634);; Biological Process: regulation of transcription, DNA-templated (GO:0006355);; Molecular Function: sequence-specific DNA binding (GO:0043565);;	--	--	--	Basic region leucine zipper	Basic leucine zipper 19 GN=OSJNBa0090H18.24 OS=Oryza sativa subsp. japonica (Rice) PE=2 SV=1	K	Transcription	PREDICTED: transcription factor RF2a-like [Setaria italica]	biological process: biological regulation (GO:0065007);; molecular function: nucleic acid binding transcription factor activity (GO:0001071);; cellular component: cell (GO:0005623);; cellular component: organelle (GO:0043226);; cellular component: cell part (GO:0044464);; molecular function: binding (GO:0005488)	--
BMK_Unigene_082847	bZIP	TF	17.0787	16.5164	16.2065	23.3033	22.4396	12.6493	0.723305	0.239775	normal	0.650012	0.470347	normal	0.898587	0.139045	normal	0.699326	-0.271028	normal	--	--	Biological Process: MAPK cascade (GO:0000165);; Biological Process: respiratory burst involved in defense response (GO:0002679);; Molecular Function: sequence-specific DNA binding transcription factor activity (GO:0003700);; Cellular Component: endoplasmic reticulum membrane (GO:0005789);; Biological Process: regulation of transcription, DNA-templated (GO:0006355);; Biological Process: protein ta…	--	--	--	Basic region leucine zipper;; bZIP transcription factor	bZIP transcription factor 60 GN=BZIP60 OS=Arabidopsis thaliana (Mouse-ear cress) PE=2 SV=1	--	--	PREDICTED: bZIP transcription factor 60-like [Setaria italica]	biological process: metabolic process (GO:0008152);; biological process: cellular process (GO:0009987);; biological process: signaling (GO:0023052);; biological process: single-organism process (GO:0044699);; biological process: response to stimulus (GO:0050896);; biological process: biological regulation (GO:0065007);; biological process: immune system process (GO:0002376);; molecular function: …	--
BMK_Unigene_084152	bZIP	TF	1.08737	1.95507	0.845227	1.51714	1.5762	2.70576	0.00200893	3.01502	up	0.607344	1.42433	normal	0.950563	0.233578	normal	0.34663	1.39979	normal	--	--	Molecular Function: double-stranded DNA binding (GO:0003690);; Molecular Function: sequence-specific DNA binding transcription factor activity (GO:0003700);; Cellular Component: nucleus (GO:0005634);; Biological Process: regulation of transcription, DNA-templated (GO:0006355);; Cellular Component: plastid (GO:0009536);; Biological Process: response to abscisic acid (GO:0009737);; Biological Proce…	K16241|2.9104e-49|sbi:SORBI_10g023420|SORBIDRAFT_10g023420, Sb10g023420; hypothetical protein; K16241 transcription factor HY5 (A)	[K]	Transcription	bZIP transcription factor;; Basic region leucine zipper	Transcription factor HY5 GN=F2I11_150 OS=Arabidopsis thaliana (Mouse-ear cress) PE=1 SV=1	K	Transcription	hypothetical protein SORBIDRAFT_10g023420 [Sorghum bicolor]	molecular function: binding (GO:0005488);; biological process: biological regulation (GO:0065007);; molecular function: nucleic acid binding transcription factor activity (GO:0001071);; cellular component: cell (GO:0005623);; cellular component: organelle (GO:0043226);; cellular component: cell part (GO:0044464);; biological process: response to stimulus (GO:0050896);; biological process: cellula…	Circadian rhythm - plant (ko04712)
BMK_Unigene_084619	bZIP	TF	3.14386	0.260278	0.244459	1.44566	0	0.302128	0.0394277	-2.86841	normal	0.0595696	-2.77278	normal	0.0410713	-3.63796	normal	0.468212	-1.51519	normal	--	--	Molecular Function: DNA binding (GO:0003677);;	--	--	--	Basic region leucine zipper;; bZIP transcription factor;; bZIP Maf transcription factor	Basic leucine zipper 6 OS=Oryza sativa subsp. japonica (Rice) PE=2 SV=1	K	Transcription	PREDICTED: transcription factor RF2b-like [Setaria italica]	molecular function: binding (GO:0005488)	--
BMK_Unigene_084694	bZIP	TF	16.0062	7.29665	6.94429	18.6994	11.0069	9.74826	0.151171	-0.794936	normal	0.231953	-0.798965	normal	0.52508	-0.557095	normal	0.106803	-0.641907	normal	--	--	Molecular Function: sequence-specific DNA binding transcription factor activity (GO:0003700);; Molecular Function: monooxygenase activity (GO:0004497);; Molecular Function: iron ion binding (GO:0005506);; Cellular Component: nucleus (GO:0005634);; Biological Process: regulation of transcription, DNA-templated (GO:0006355);; Molecular Function: electron carrier activity (GO:0009055);; Cellular Com…	--	[Q]	Secondary metabolites biosynthesis, transport and catabolism	bZIP transcription factor;; Basic region leucine zipper;; Protein of unknown function (DUF1363)	Isoflavone 3&apos;-hydroxylase {ECO:0000303|PubMed:14617078} (Fragment) OS=Medicago truncatula (Barrel medic) PE=1 SV=1	Q	Secondary metabolites biosynthesis, transport and catabolism	PREDICTED: cytochrome P450 81D1-like [Setaria italica]	biological process: biological regulation (GO:0065007);; molecular function: nucleic acid binding transcription factor activity (GO:0001071);; biological process: metabolic process (GO:0008152);; biological process: single-organism process (GO:0044699);; molecular function: catalytic activity (GO:0003824);; molecular function: binding (GO:0005488);; cellular component: cell (GO:0005623);; cellula…	--
BMK_Unigene_085331	bZIP	TF	19.2288	61.4054	53.9423	27.9066	46.4646	73.4269	3.21154e-06	2.15163	up	3.10932e-07	2.48791	up	0.100909	1.12772	normal	2.77259e-06	1.87545	up	--	--	Molecular Function: sequence-specific DNA binding transcription factor activity (GO:0003700);; Cellular Component: nucleus (GO:0005634);; Biological Process: regulation of transcription, DNA-templated (GO:0006355);; Molecular Function: sequence-specific DNA binding (GO:0043565);;	--	--	--	Basic leucine-zipper C terminal;; bZIP transcription factor;; Basic region leucine zipper	Light-inducible protein CPRF2 GN=CPRF2 OS=Petroselinum crispum (Parsley) PE=2 SV=2	K	Transcription	PREDICTED: light-inducible protein CPRF2-like [Setaria italica]	biological process: biological regulation (GO:0065007);; molecular function: nucleic acid binding transcription factor activity (GO:0001071);; cellular component: cell (GO:0005623);; cellular component: organelle (GO:0043226);; cellular component: cell part (GO:0044464);; molecular function: binding (GO:0005488)	--
BMK_Unigene_085417	bZIP	TF	21.786	8.29202	11.6298	23.1294	11.1525	30.7764	0.59743	-0.71015	normal	0.87542	-0.222646	normal	0.751897	-0.606225	normal	0.397438	0.805088	normal	--	--	Molecular Function: sequence-specific DNA binding transcription factor activity (GO:0003700);; Cellular Component: nucleus (GO:0005634);; Biological Process: regulation of transcription, DNA-templated (GO:0006355);; Molecular Function: sequence-specific DNA binding (GO:0043565);;	K09060|1.71652e-170|sita:101756519|transcription factor HBP-1a-like; K09060 plant G-box-binding factor (A)	--	--	bZIP transcription factor;; G-box binding protein MFMR;; Basic region leucine zipper	Transcription factor HBP-1a OS=Triticum aestivum (Wheat) PE=2 SV=1	K	Transcription	PREDICTED: transcription factor HBP-1a-like [Setaria italica]	biological process: biological regulation (GO:0065007);; molecular function: nucleic acid binding transcription factor activity (GO:0001071);; cellular component: cell (GO:0005623);; cellular component: organelle (GO:0043226);; cellular component: cell part (GO:0044464);; molecular function: binding (GO:0005488)	--
BMK_Unigene_087035	bZIP	TF	17.4637	32.9528	34.3797	11.7373	28.1402	15.4786	0.58567	0.528139	normal	0.358034	0.818447	normal	0.578363	0.802337	normal	0.972123	0.0432849	normal	--	--	Molecular Function: sequence-specific DNA binding transcription factor activity (GO:0003700);; Biological Process: regulation of transcription, DNA-templated (GO:0006355);; Molecular Function: sequence-specific DNA binding (GO:0043565);;	K14432|1.13831e-110|osa:4330838|Os02g0766700; K14432 ABA responsive element binding factor (A)	--	--	bZIP transcription factor;; Basic region leucine zipper;; bZIP Maf transcription factor	ABSCISIC ACID-INSENSITIVE 5-like protein 7 GN=MVI11.7 OS=Arabidopsis thaliana (Mouse-ear cress) PE=1 SV=1	K	Transcription	PREDICTED: ABSCISIC ACID-INSENSITIVE 5-like protein 7-like isoform X2 [Setaria italica]	biological process: biological regulation (GO:0065007);; molecular function: nucleic acid binding transcription factor activity (GO:0001071);; molecular function: binding (GO:0005488)	Plant hormone signal transduction (ko04075)
BMK_Unigene_087641	bZIP	TF	31.9309	44.8067	32.1667	17.3601	45.2141	30.9262	0.127231	0.914196	normal	0.650012	0.572815	normal	0.00139562	1.92366	up	0.00243486	1.61271	up	--	--	Molecular Function: sequence-specific DNA binding transcription factor activity (GO:0003700);; Biological Process: regulation of transcription, DNA-templated (GO:0006355);; Biological Process: abscisic acid-activated signaling pathway (GO:0009738);; Molecular Function: sequence-specific DNA binding (GO:0043565);; Molecular Function: transcription regulatory region DNA binding (GO:0044212);;	K14432|9.69415e-147|sita:101765591|bZIP transcription factor TRAB1-like; K14432 ABA responsive element binding factor (A)	--	--	bZIP transcription factor;; Basic region leucine zipper	bZIP transcription factor TRAB1 OS=Oryza sativa subsp. japonica (Rice) PE=1 SV=1	--	--	PREDICTED: bZIP transcription factor TRAB1-like [Setaria italica]	biological process: biological regulation (GO:0065007);; molecular function: nucleic acid binding transcription factor activity (GO:0001071);; biological process: cellular process (GO:0009987);; biological process: signaling (GO:0023052);; biological process: single-organism process (GO:0044699);; biological process: response to stimulus (GO:0050896);; molecular function: binding (GO:0005488)	Plant hormone signal transduction (ko04075)
BMK_Unigene_087862	bZIP	TF	53.1567	67.4034	66.3193	48.2377	68.4091	58.7019	0.613943	0.3333	normal	0.213952	0.836064	normal	0.751897	0.379314	normal	0.86526	0.181788	normal	--	--	Molecular Function: sequence-specific DNA binding transcription factor activity (GO:0003700);; Cellular Component: nucleus (GO:0005634);; Cellular Component: cytoplasm (GO:0005737);; Biological Process: regulation of transcription, DNA-templated (GO:0006355);; Biological Process: response to xenobiotic stimulus (GO:0009410);; Biological Process: systemic acquired resistance (GO:0009627);; Biologi…	K14431|4.0332e-180|sita:101767398|transcription factor HBP-1b(c38)-like; K14431 transcription factor TGA (A)	--	--	Seed dormancy control;; bZIP transcription factor;; Basic region leucine zipper	Transcription factor HBP-1b(c38) OS=Triticum aestivum (Wheat) PE=2 SV=1	--	--	PREDICTED: transcription factor HBP-1b(c38)-like isoform X4 [Setaria italica]	biological process: biological regulation (GO:0065007);; molecular function: nucleic acid binding transcription factor activity (GO:0001071);; cellular component: cell (GO:0005623);; cellular component: organelle (GO:0043226);; cellular component: cell part (GO:0044464);; biological process: response to stimulus (GO:0050896);; biological process: immune system process (GO:0002376);; biological pr…	Plant hormone signal transduction (ko04075)
BMK_Unigene_087873	bZIP	TF	4.72523	4.33014	3.24383	5.08502	4.90786	4.28013	0.484376	0.785129	normal	0.650012	0.596288	normal	0.83614	0.28533	normal	0.720192	0.278979	normal	--	--	--	K14432|1.71169e-36|sita:101758063|G-box-binding factor 4-like; K14432 ABA responsive element binding factor (A)	--	--	bZIP transcription factor;; Basic region leucine zipper	G-box-binding factor 4 GN=F21M11.10 OS=Arabidopsis thaliana (Mouse-ear cress) PE=1 SV=1	--	--	PREDICTED: G-box-binding factor 4-like isoform X1 [Setaria italica]	--	Plant hormone signal transduction (ko04075)
BMK_Unigene_088351	bZIP	TF	5.22021	4.00622	5.01553	4.60924	3.53095	2.92724	0.613943	0.727406	normal	0.686725	0.585667	normal	0.89831	-0.336256	normal	0.988973	0.0235288	normal	--	--	Molecular Function: sequence-specific DNA binding transcription factor activity (GO:0003700);; Biological Process: regulation of transcription, DNA-templated (GO:0006355);; Molecular Function: sequence-specific DNA binding (GO:0043565);;	K14431|0|sbi:SORBI_02g018870|SORBIDRAFT_02g018870, Sb02g018870; hypothetical protein; K14431 transcription factor TGA (A)	--	--	Seed dormancy control;; bZIP transcription factor;; Basic region leucine zipper	TGACG-sequence-specific DNA-binding protein TGA-2.1 GN=TGA21 OS=Nicotiana tabacum (Common tobacco) PE=1 SV=1	S	Function unknown	hypothetical protein SORBIDRAFT_02g018870 [Sorghum bicolor]	biological process: biological regulation (GO:0065007);; molecular function: nucleic acid binding transcription factor activity (GO:0001071);; molecular function: binding (GO:0005488)	Plant hormone signal transduction (ko04075)
BMK_Unigene_089830	bZIP	TF	8.16898	15.5102	21.1568	9.89186	16.9659	15.1981	0.0418562	1.4584	normal	0.0336317	1.62598	normal	0.0649209	1.22413	normal	0.00406899	1.53804	up	--	--	Molecular Function: sequence-specific DNA binding transcription factor activity (GO:0003700);; Molecular Function: transporter activity (GO:0005215);; Biological Process: regulation of transcription, DNA-templated (GO:0006355);; Biological Process: transport (GO:0006810);; Cellular Component: membrane (GO:0016020);; Molecular Function: sequence-specific DNA binding (GO:0043565);;	--	--	--	Basic region leucine zipper;; bZIP transcription factor	Transcription factor RF2b GN=RF2b OS=Oryza sativa subsp. japonica (Rice) PE=1 SV=1	--	--	hypothetical protein SORBIDRAFT_07g025270 [Sorghum bicolor]	biological process: biological regulation (GO:0065007);; molecular function: nucleic acid binding transcription factor activity (GO:0001071);; biological process: localization (GO:0051179);; molecular function: transporter activity (GO:0005215);; cellular component: membrane (GO:0016020);; molecular function: binding (GO:0005488)	--
BMK_Unigene_090112	bZIP	TF	49.2421	30.3869	38.9677	47.5349	34.6569	42.9335	0.635931	-0.286313	normal	0.65547	0.354076	normal	0.931974	-0.103014	normal	0.521643	0.418485	normal	[S]	Function unknown	Molecular Function: sequence-specific DNA binding transcription factor activity (GO:0003700);; Biological Process: regulation of transcription, DNA-templated (GO:0006355);; Biological Process: response to cold (GO:0009409);; Biological Process: systemic acquired resistance, salicylic acid mediated signaling pathway (GO:0009862);; Biological Process: defense response to bacterium (GO:0042742);; Mo…	K14431|0|sita:101781674|transcription factor TGA4-like; K14431 transcription factor TGA (A)	--	--	Seed dormancy control;; bZIP transcription factor;; Basic region leucine zipper;; NRDE protein	Transcription factor TGA4 GN=T31P16_20 OS=Arabidopsis thaliana (Mouse-ear cress) PE=1 SV=2	K	Transcription	PREDICTED: transcription factor TGA4-like isoform X1 [Setaria italica]	biological process: biological regulation (GO:0065007);; molecular function: nucleic acid binding transcription factor activity (GO:0001071);; biological process: response to stimulus (GO:0050896);; biological process: immune system process (GO:0002376);; biological process: cellular process (GO:0009987);; biological process: signaling (GO:0023052);; biological process: single-organism process (G…	Plant hormone signal transduction (ko04075)
BMK_Unigene_090155	bZIP	TF	61.8688	40.2088	46.0787	35.1087	76.7464	61.2009	0.981244	-0.0214038	normal	0.851911	0.220817	normal	0.10374	1.37699	normal	0.0476237	0.932644	normal	--	--	Molecular Function: sequence-specific DNA binding transcription factor activity (GO:0003700);; Biological Process: regulation of transcription, DNA-templated (GO:0006355);; Cellular Component: plastid (GO:0009536);; Molecular Function: sequence-specific DNA binding (GO:0043565);;	--	--	--	bZIP transcription factor;; Basic region leucine zipper	--	K	Transcription	PREDICTED: ocs element-binding factor 1-like [Setaria italica]	biological process: biological regulation (GO:0065007);; molecular function: nucleic acid binding transcription factor activity (GO:0001071);; cellular component: cell (GO:0005623);; cellular component: organelle (GO:0043226);; cellular component: cell part (GO:0044464);; molecular function: binding (GO:0005488)	--
BMK_Unigene_090229	bZIP	TF	20.9401	32.1605	23.8586	13.4141	30.1823	28.3426	0.315713	0.877457	normal	0.650012	0.580245	normal	0.161989	1.34107	normal	0.00200901	1.74761	up	--	--	Molecular Function: sequence-specific DNA binding transcription factor activity (GO:0003700);; Cellular Component: nucleus (GO:0005634);; Biological Process: regulation of transcription, DNA-templated (GO:0006355);; Molecular Function: sequence-specific DNA binding (GO:0043565);;	K14432|5.63248e-70|sbi:SORBI_03g040970|SORBIDRAFT_03g040970, Sb03g040970; hypothetical protein; K14432 ABA responsive element binding factor (A)	--	--	bZIP transcription factor;; Basic region leucine zipper	G-box-binding factor 4 GN=F21M11.10 OS=Arabidopsis thaliana (Mouse-ear cress) PE=1 SV=1	K	Transcription	hypothetical protein SORBIDRAFT_03g040970 [Sorghum bicolor]	biological process: biological regulation (GO:0065007);; molecular function: nucleic acid binding transcription factor activity (GO:0001071);; cellular component: cell (GO:0005623);; cellular component: organelle (GO:0043226);; cellular component: cell part (GO:0044464);; molecular function: binding (GO:0005488)	Plant hormone signal transduction (ko04075)
BMK_Unigene_090889	bZIP	TF	36.2369	16.6746	15.1292	45.4237	20.7098	25.8327	0.914072	-0.149547	normal	0.570314	-0.77292	normal	0.315799	-0.869124	normal	0.565396	-0.548674	normal	--	--	Molecular Function: sequence-specific DNA binding transcription factor activity (GO:0003700);; Cellular Component: mitochondrion (GO:0005739);; Biological Process: regulation of transcription, DNA-templated (GO:0006355);; Molecular Function: sequence-specific DNA binding (GO:0043565);;	K14431|0|sita:101755908|transcription factor HBP-1b(c1)-like; K14431 transcription factor TGA (A)	--	--	Seed dormancy control;; bZIP transcription factor;; Basic region leucine zipper	TGACG-sequence-specific DNA-binding protein TGA-2.1 GN=TGA21 OS=Nicotiana tabacum (Common tobacco) PE=1 SV=1	--	--	PREDICTED: transcription factor HBP-1b(c1)-like isoform X2 [Setaria italica]	biological process: biological regulation (GO:0065007);; molecular function: nucleic acid binding transcription factor activity (GO:0001071);; cellular component: cell (GO:0005623);; cellular component: organelle (GO:0043226);; cellular component: cell part (GO:0044464);; molecular function: binding (GO:0005488)	Plant hormone signal transduction (ko04075)
BMK_Unigene_091213	bZIP	TF	4.75202	9.25298	10.0267	8.39191	8.43646	6.11136	0.509164	1.19354	normal	0.185534	1.81771	normal	0.751897	0.756641	normal	0.961612	0.107191	normal	--	--	--	K14431|5.58106e-73|sita:101782038|transcription factor TGA2-like; K14431 transcription factor TGA (A)	--	--	bZIP transcription factor;; Basic region leucine zipper;; Seed dormancy control	Transcription factor HBP-1b(c1) (Fragment) OS=Triticum aestivum (Wheat) PE=1 SV=2	S	Function unknown	PREDICTED: transcription factor TGA2-like isoform X1 [Setaria italica]	--	Plant hormone signal transduction (ko04075)
BMK_Unigene_091272	bZIP	TF	2.9647	3.10297	1.90769	0.216946	2.40656	0.909789	0.795666	-0.621341	normal	0.907855	-0.365851	normal	0.72579	1.48368	normal	0.583367	1.50951	normal	--	--	--	--	--	--	bZIP transcription factor;; Basic region leucine zipper	--	S	Function unknown	PREDICTED: ocs element-binding factor 1-like [Setaria italica]	--	--
BMK_Unigene_092992	bZIP	TF	4.58446	0	0	14.2557	7.38259	6.88091	9.36802e-06	-6.74582	down	1.86439e-05	-6.51569	down	0.762888	-0.643495	normal	0.654934	-0.65986	normal	--	--	--	--	--	--	bZIP transcription factor	--	S	Function unknown	--	--	--
BMK_Unigene_092993	bZIP	TF	1.24851	0	0.017208	4.06102	3.44155	12.5746	0.000779779	-5.72468	down	0.00383478	-4.48962	down	0.989392	0.0409222	normal	0.0210605	1.85313	normal	--	--	--	--	--	--	Basic region leucine zipper;; bZIP transcription factor	--	S	Function unknown	--	--	--
BMK_Unigene_093244	bZIP	TF	0.571079	0	0.0429954	3.06182	2.97128	4.58112	0.00550352	-5.14228	down	0.211994	-2.61521	normal	0.956872	0.198277	normal	0.45163	0.867698	normal	--	--	Molecular Function: sequence-specific DNA binding transcription factor activity (GO:0003700);; Biological Process: regulation of transcription, DNA-templated (GO:0006355);; Molecular Function: sequence-specific DNA binding (GO:0043565);;	--	--	--	bZIP transcription factor	--	S	Function unknown	hypothetical protein COCSADRAFT_34697 [Bipolaris sorokiniana ND90Pr]	biological process: biological regulation (GO:0065007);; molecular function: nucleic acid binding transcription factor activity (GO:0001071);; molecular function: binding (GO:0005488)	--
BMK_Unigene_095178	bZIP	TF	0.52092	0.621314	0.0273684	0.0775116	0	0.256543	0.738487	0.554677	normal	0.251008	-2.69429	normal	0.751897	-1.03483	normal	0.570072	1.46254	normal	--	--	--	--	[K]	Transcription	bZIP transcription factor;; Basic region leucine zipper	--	K	Transcription	--	--	--
BMK_Unigene_096863	bZIP	TF	0	0.0934431	0.097767	0	0.377454	0	--	--	--	--	--	--	0.751897	0.924937	normal	--	--	--	--	--	--	--	[K]	Transcription	bZIP transcription factor;; Basic region leucine zipper;; bZIP Maf transcription factor	--	K	Transcription	predicted protein [Hordeum vulgare subsp. vulgare]	--	--
BMK_Unigene_097025	bZIP	TF	2.21877	5.25687	1.95999	0.159617	0.784936	0	0.60326	1.26578	normal	0.953918	0.239563	normal	0.663524	1.61389	normal	0.679409	-1.25031	normal	--	--	--	--	--	--	bZIP transcription factor;; Basic region leucine zipper	--	S	Function unknown	hypothetical protein NECHADRAFT_65174 [Nectria haematococca mpVI 77-13-4]	--	--
BMK_Unigene_100893	bZIP	TF	0	0	0	0	0.17737	0	--	--	--	--	--	--	0.751897	0.786137	normal	--	--	--	--	--	--	--	--	--	bZIP transcription factor;; Basic region leucine zipper	--	--	--	--	--	--
BMK_Unigene_102603	bZIP	TF	0	0	0	0	0	0	--	--	--	--	--	--	--	--	--	--	--	--	--	--	--	--	--	--	bZIP transcription factor;; Basic region leucine zipper	--	--	--	--	--	--
BMK_Unigene_045642	C2C2-CO-like	TF	14.3807	38.8414	55.9268	12.7799	20.1339	50.6457	0.913693	-0.152154	normal	0.597165	0.746668	normal	0.390704	-1.22895	normal	0.96906	-0.0645643	normal	--	--	Cellular Component: plastid (GO:0009536);;	--	[K]	Transcription	CCT motif;; B-box zinc finger	Zinc finger protein CONSTANS-LIKE 16 GN=COL16 OS=Arabidopsis thaliana (Mouse-ear cress) PE=2 SV=2	K	Transcription	PREDICTED: zinc finger protein CONSTANS-LIKE 16-like [Setaria italica]	cellular component: cell (GO:0005623);; cellular component: organelle (GO:0043226);; cellular component: cell part (GO:0044464)	--
BMK_Unigene_045891	C2C2-CO-like	TF	39.3153	11.1318	4.93545	48.4359	15.8798	12.2092	0.705133	-0.317395	normal	0.0787539	-1.40735	normal	0.207572	-1.50866	normal	0.0215165	-1.75065	normal	--	--	Cellular Component: mitochondrion (GO:0005739);; Molecular Function: zinc ion binding (GO:0008270);;	--	[K]	Transcription	CCT motif;; B-box zinc finger	Zinc finger protein CONSTANS-LIKE 5 GN=COL5 OS=Arabidopsis thaliana (Mouse-ear cress) PE=2 SV=2	--	--	PREDICTED: zinc finger protein CONSTANS-LIKE 5-like [Setaria italica]	cellular component: cell (GO:0005623);; cellular component: organelle (GO:0043226);; cellular component: cell part (GO:0044464);; molecular function: binding (GO:0005488)	--
BMK_Unigene_051214	C2C2-CO-like	TF	10.813	12.9867	11.0773	8.96892	14.6417	22.9855	0.658915	0.578253	normal	0.602371	0.980024	normal	0.597165	1.48007	normal	0.00712397	2.69574	up	--	--	Molecular Function: DNA binding (GO:0003677);; Cellular Component: nucleus (GO:0005634);; Cellular Component: plasma membrane (GO:0005886);; Molecular Function: zinc ion binding (GO:0008270);; Biological Process: negative regulation of long-day photoperiodism, flowering (GO:0048579);;	--	--	--	CCT motif;; B-box zinc finger	Zinc finger protein CONSTANS-LIKE 9 GN=COL9 OS=Arabidopsis thaliana (Mouse-ear cress) PE=2 SV=1	R	General function prediction only	PREDICTED: zinc finger protein CONSTANS-LIKE 9-like [Setaria italica]	molecular function: binding (GO:0005488);; cellular component: cell (GO:0005623);; cellular component: organelle (GO:0043226);; cellular component: cell part (GO:0044464);; cellular component: membrane (GO:0016020);; biological process: biological regulation (GO:0065007)	--
BMK_Unigene_090211	C2C2-CO-like	TF	10.4086	12.2575	10.1751	8.7906	14.0516	21.7175	0.962659	-0.121664	normal	0.826268	-0.538232	normal	0.751897	0.728515	normal	0.291851	1.45637	normal	--	--	Molecular Function: DNA binding (GO:0003677);; Cellular Component: nucleus (GO:0005634);; Cellular Component: plasma membrane (GO:0005886);; Molecular Function: zinc ion binding (GO:0008270);; Biological Process: negative regulation of long-day photoperiodism, flowering (GO:0048579);;	--	--	--	CCT motif;; B-box zinc finger	Zinc finger protein CONSTANS-LIKE 10 GN=COL10 OS=Arabidopsis thaliana (Mouse-ear cress) PE=1 SV=1	R	General function prediction only	PREDICTED: zinc finger protein CONSTANS-LIKE 9-like [Setaria italica]	molecular function: binding (GO:0005488);; cellular component: cell (GO:0005623);; cellular component: organelle (GO:0043226);; cellular component: cell part (GO:0044464);; cellular component: membrane (GO:0016020);; biological process: biological regulation (GO:0065007)	--
BMK_Unigene_002431	C2C2-Dof	TF	0.689885	0.466943	0.208115	0.884065	0.992893	0.494279	0.926634	-0.178658	normal	0.650012	-1.10845	normal	0.887066	0.343793	normal	0.851553	-0.393363	normal	--	--	--	--	--	--	Dof domain, zinc finger	Dof zinc finger protein DOF1.5 GN=F28N24.35 OS=Arabidopsis thaliana (Mouse-ear cress) PE=1 SV=1	S	Function unknown	PREDICTED: dof zinc finger protein DOF1.5-like [Brachypodium distachyon]	--	--
BMK_Unigene_007004	C2C2-Dof	TF	52.2543	39.0019	45.0942	50.4071	30.8921	41.5166	0.969412	-0.0362902	normal	0.715507	0.307058	normal	0.778371	-0.395773	normal	0.930159	0.102282	normal	--	--	Molecular Function: DNA binding (GO:0003677);; Biological Process: regulation of transcription, DNA-templated (GO:0006355);;	--	--	--	Dof domain, zinc finger	Cyclic dof factor 2 GN=MIJ24.16 OS=Arabidopsis thaliana (Mouse-ear cress) PE=1 SV=2	R	General function prediction only	PREDICTED: cyclic dof factor 3-like [Setaria italica]	molecular function: binding (GO:0005488);; biological process: biological regulation (GO:0065007)	--
BMK_Unigene_008918	C2C2-Dof	TF	10.0888	4.24848	3.48295	5.67802	5.93336	4.6109	0.303338	-0.857231	normal	0.274921	-0.975146	normal	0.823058	0.29606	normal	0.964494	0.0770227	normal	--	--	Biological Process: cellular metabolic process (GO:0044237);; Biological Process: response to stimulus (GO:0050896);; Biological Process: organic substance metabolic process (GO:0071704);;	--	--	--	Dof domain, zinc finger	Dof zinc finger protein DOF4.1 OS=Arabidopsis thaliana (Mouse-ear cress) PE=2 SV=2	--	--	PREDICTED: dof zinc finger protein PBF-like isoform X2 [Setaria italica]	biological process: metabolic process (GO:0008152);; biological process: cellular process (GO:0009987);; biological process: response to stimulus (GO:0050896)	--
BMK_Unigene_010290	C2C2-Dof	TF	21.6754	9.36768	6.8997	22.1008	8.45518	8.53685	0.476587	-0.992683	normal	0.548253	-1.02745	normal	0.751897	-0.976383	normal	0.845354	-0.349396	normal	--	--	Molecular Function: DNA binding (GO:0003677);; Biological Process: regulation of transcription, DNA-templated (GO:0006355);; Molecular Function: transferase activity, transferring acyl groups other than amino-acyl groups (GO:0016747);;	--	--	--	Dof domain, zinc finger	Dof zinc finger protein DOF1.7 GN=F19C24.9 OS=Arabidopsis thaliana (Mouse-ear cress) PE=2 SV=1	K	Transcription	PREDICTED: dof zinc finger protein DOF5.4-like [Setaria italica]	molecular function: binding (GO:0005488);; biological process: biological regulation (GO:0065007);; biological process: metabolic process (GO:0008152);; molecular function: catalytic activity (GO:0003824)	--
BMK_Unigene_013390	C2C2-Dof	TF	3.14169	1.12889	0.502296	2.37925	1.52707	1.27607	0.225956	-1.06629	normal	0.0474462	-1.97709	normal	0.80512	-0.338711	normal	0.699326	-0.479754	normal	--	--	--	--	--	--	Dof domain, zinc finger	Dof zinc finger protein DOF3.6 GN=T22E16.30 OS=Arabidopsis thaliana (Mouse-ear cress) PE=1 SV=2	R	General function prediction only	PREDICTED: dof zinc finger protein DOF3.6-like isoform X2 [Setaria italica]	--	--
BMK_Unigene_016047	C2C2-Dof	TF	41.8567	20.3871	17.7693	36.285	18.9158	19.3497	0.125791	-0.657365	normal	0.482292	-0.66591	normal	0.555009	-0.647543	normal	0.443198	-0.527975	normal	--	--	Molecular Function: DNA binding (GO:0003677);; Biological Process: regulation of transcription, DNA-templated (GO:0006355);;	--	--	--	Dof domain, zinc finger	Dof zinc finger protein DOF4.6 GN=DOF4.6 OS=Arabidopsis thaliana (Mouse-ear cress) PE=2 SV=2	R	General function prediction only	PREDICTED: dof zinc finger protein DOF4.6-like [Setaria italica]	molecular function: binding (GO:0005488);; biological process: biological regulation (GO:0065007)	--
BMK_Unigene_016554	C2C2-Dof	TF	22.4541	8.42855	6.35251	16.491	8.16273	9.18871	0.0185667	-1.02345	normal	0.0110267	-1.26506	normal	0.508896	-0.725059	normal	0.586457	-0.460098	normal	--	--	Molecular Function: DNA binding (GO:0003677);; Molecular Function: sequence-specific DNA binding transcription factor activity (GO:0003700);; Biological Process: regulation of transcription, DNA-templated (GO:0006355);; Molecular Function: zinc ion binding (GO:0008270);;	--	--	--	Dof domain, zinc finger	Dof zinc finger protein DOF5.3 GN=DOF5.3 OS=Arabidopsis thaliana (Mouse-ear cress) PE=2 SV=1	--	--	predicted protein [Hordeum vulgare subsp. vulgare]	molecular function: binding (GO:0005488);; biological process: biological regulation (GO:0065007);; molecular function: nucleic acid binding transcription factor activity (GO:0001071)	--
BMK_Unigene_017298	C2C2-Dof	TF	52.8815	24.8206	38.4662	50.7976	25.1236	31.6391	0.380595	-0.69792	normal	0.956564	0.0695111	normal	0.507609	-0.709233	normal	0.699326	-0.297868	normal	--	--	Molecular Function: DNA binding (GO:0003677);; Biological Process: regulation of transcription, DNA-templated (GO:0006355);;	--	--	--	Dof domain, zinc finger	Cyclic dof factor 2 GN=MIJ24.16 OS=Arabidopsis thaliana (Mouse-ear cress) PE=1 SV=2	R	General function prediction only	PREDICTED: cyclic dof factor 2-like [Setaria italica]	molecular function: binding (GO:0005488);; biological process: biological regulation (GO:0065007)	--
BMK_Unigene_037375	C2C2-Dof	TF	23.8524	47.1057	38.5303	30.7978	25.7183	39.6146	0.00260143	1.64842	up	0.0226432	1.47128	normal	0.960119	0.118133	normal	0.201849	0.793342	normal	--	--	Molecular Function: DNA binding (GO:0003677);;	--	--	--	Dof domain, zinc finger	Cyclic dof factor 3 GN=F1P2.50 OS=Arabidopsis thaliana (Mouse-ear cress) PE=1 SV=2	R	General function prediction only	PREDICTED: cyclic dof factor 3-like [Setaria italica]	molecular function: binding (GO:0005488)	--
BMK_Unigene_038095	C2C2-Dof	TF	2.85124	1.28264	1.21477	1.07928	0.74061	1.24899	0.065215	-3.2131	normal	0.534794	-1.5233	normal	0.73798	1.33949	normal	0.775362	0.713988	normal	--	--	Molecular Function: DNA binding (GO:0003677);; Molecular Function: sequence-specific DNA binding transcription factor activity (GO:0003700);; Biological Process: regulation of transcription, DNA-templated (GO:0006355);; Molecular Function: zinc ion binding (GO:0008270);;	--	--	--	Dof domain, zinc finger	Dof zinc finger protein DOF1.4 GN=DOF1.4 OS=Arabidopsis thaliana (Mouse-ear cress) PE=2 SV=1	R	General function prediction only	PREDICTED: dof zinc finger protein DOF5.1-like isoform X2 [Setaria italica]	molecular function: binding (GO:0005488);; biological process: biological regulation (GO:0065007);; molecular function: nucleic acid binding transcription factor activity (GO:0001071)	--
BMK_Unigene_042737	C2C2-Dof	TF	5.68553	2.83509	3.50079	10.5887	3.74878	4.6145	0.496537	-0.614728	normal	0.876909	-0.164696	normal	0.212597	-1.15473	normal	0.241122	-0.796374	normal	--	--	Molecular Function: DNA binding (GO:0003677);; Biological Process: regulation of transcription, DNA-templated (GO:0006355);;	--	--	--	Dof domain, zinc finger	Dof zinc finger protein DOF4.6 GN=DOF4.6 OS=Arabidopsis thaliana (Mouse-ear cress) PE=2 SV=2	R	General function prediction only	hypothetical protein OsI_08442 [Oryza sativa Indica Group]	molecular function: binding (GO:0005488);; biological process: biological regulation (GO:0065007)	--
BMK_Unigene_045201	C2C2-Dof	TF	25.8052	11.5122	16.2646	38.3752	4.74554	37.3169	0.613943	-0.63728	normal	0.867717	-0.268159	normal	0.0631909	-2.08547	normal	0.847601	0.250353	normal	--	--	Molecular Function: DNA binding (GO:0003677);; Biological Process: regulation of transcription, DNA-templated (GO:0006355);;	--	--	--	Dof domain, zinc finger	Cyclic dof factor 2 GN=MIJ24.16 OS=Arabidopsis thaliana (Mouse-ear cress) PE=1 SV=2	R	General function prediction only	PREDICTED: cyclic dof factor 2-like isoform X1 [Setaria italica]	molecular function: binding (GO:0005488);; biological process: biological regulation (GO:0065007)	--
BMK_Unigene_074063	C2C2-Dof	TF	0	0.664256	0	0	0.26837	0.177047	0.432804	2.37705	normal	--	--	--	0.751897	0.90481	normal	--	--	--	--	--	Molecular Function: DNA binding (GO:0003677);; Biological Process: regulation of transcription, DNA-templated (GO:0006355);; Cellular Component: plastid (GO:0009536);;	--	--	--	Dof domain, zinc finger	Dof zinc finger protein DOF3.5 GN=DOF3.5 OS=Arabidopsis thaliana (Mouse-ear cress) PE=3 SV=1	R	General function prediction only	PREDICTED: transcription initiation factor TFIID subunit 4-like [Setaria italica]	molecular function: binding (GO:0005488);; biological process: biological regulation (GO:0065007);; cellular component: cell (GO:0005623);; cellular component: organelle (GO:0043226);; cellular component: cell part (GO:0044464)	--
BMK_Unigene_074944	C2C2-Dof	TF	0.188777	0.497514	0.0574662	0.471867	1.06821	0.0581859	0.613943	1.28806	normal	0.862139	-0.612397	normal	0.751897	1.16769	normal	0.675582	-1.33819	normal	--	--	Cellular Component: plastid (GO:0009536);;	--	--	--	Dof domain, zinc finger	--	R	General function prediction only	PREDICTED: transcription initiation factor TFIID subunit 4-like [Setaria italica]	cellular component: cell (GO:0005623);; cellular component: organelle (GO:0043226);; cellular component: cell part (GO:0044464)	--
BMK_Unigene_085599	C2C2-Dof	TF	0.197248	0.235775	0.44466	14.3894	2.06382	2.81876	0.646487	1.2514	normal	0.650012	1.5612	normal	0.192962	-2.14521	normal	0.0402409	-1.7641	normal	--	--	Molecular Function: DNA binding (GO:0003677);; Cellular Component: nucleus (GO:0005634);; Biological Process: regulation of transcription, DNA-templated (GO:0006355);; Molecular Function: metal ion binding (GO:0046872);;	--	--	--	Dof domain, zinc finger	Dof zinc finger protein MNB1A GN=MNB1A OS=Zea mays (Maize) PE=1 SV=2	R	General function prediction only	PREDICTED: dof zinc finger protein MNB1A-like [Setaria italica]	molecular function: binding (GO:0005488);; cellular component: cell (GO:0005623);; cellular component: organelle (GO:0043226);; cellular component: cell part (GO:0044464);; biological process: biological regulation (GO:0065007)	--
BMK_Unigene_087365	C2C2-Dof	TF	28.4617	47.0064	42.8526	35.4321	30.8242	41.5316	0.147835	0.997348	normal	0.0294118	1.33791	normal	0.751897	0.571349	normal	0.58828	0.674304	normal	--	--	Molecular Function: DNA binding (GO:0003677);;	--	--	--	Dof domain, zinc finger	Cyclic dof factor 3 GN=F1P2.50 OS=Arabidopsis thaliana (Mouse-ear cress) PE=1 SV=2	R	General function prediction only	PREDICTED: cyclic dof factor 3-like [Setaria italica]	molecular function: binding (GO:0005488)	--
BMK_Unigene_087830	C2C2-Dof	TF	6.0786	20.7464	34.7842	16.1427	43.0591	23.0904	0.000486878	2.08262	up	0.000108803	2.86052	up	0.0425655	1.60301	normal	0.313757	0.858887	normal	--	--	Molecular Function: DNA binding (GO:0003677);; Molecular Function: sequence-specific DNA binding transcription factor activity (GO:0003700);; Molecular Function: protein binding (GO:0005515);; Cellular Component: nucleus (GO:0005634);; Cellular Component: plastid (GO:0009536);; Biological Process: response to auxin (GO:0009733);; Biological Process: response to salicylic acid (GO:0009751);; Biolo…	--	--	--	Dof domain, zinc finger	Dof zinc finger protein DOF3.4 GN=F11C1_250 OS=Arabidopsis thaliana (Mouse-ear cress) PE=1 SV=2	--	--	PREDICTED: dof zinc finger protein PBF-like [Setaria italica]	molecular function: binding (GO:0005488);; biological process: biological regulation (GO:0065007);; molecular function: nucleic acid binding transcription factor activity (GO:0001071);; cellular component: cell (GO:0005623);; cellular component: organelle (GO:0043226);; cellular component: cell part (GO:0044464);; biological process: response to stimulus (GO:0050896);; biological process: cellula…	--
BMK_Unigene_088111	C2C2-Dof	TF	22.0286	12.6368	14.5447	32.5249	7.22	33.4025	0.86562	-0.248417	normal	0.979073	-0.0424763	normal	0.0199964	-2.57562	normal	0.632543	0.720422	normal	--	--	Molecular Function: DNA binding (GO:0003677);; Biological Process: regulation of transcription, DNA-templated (GO:0006355);;	--	--	--	Dof domain, zinc finger	Cyclic dof factor 2 GN=MIJ24.16 OS=Arabidopsis thaliana (Mouse-ear cress) PE=1 SV=2	R	General function prediction only	PREDICTED: cyclic dof factor 2-like isoform X2 [Setaria italica]	molecular function: binding (GO:0005488);; biological process: biological regulation (GO:0065007)	--
BMK_Unigene_089287	C2C2-Dof	TF	15.6435	7.11972	4.85858	28.8207	20.3188	9.1593	0.607526	-0.454457	normal	0.218028	-1.25644	normal	0.963581	0.141375	normal	0.00591281	-1.43383	down	--	--	Cellular Component: GINS complex (GO:0000811);; Biological Process: DNA replication initiation (GO:0006270);; Biological Process: regulation of DNA replication (GO:0006275);; Biological Process: regulation of cell cycle (GO:0051726);;	K10735|4.62667e-69|sita:101781974|DNA replication complex GINS protein SLD5-like; K10735 GINS complex subunit 4 (A)	--	--	Dof domain, zinc finger;; GINS complex protein	Dof zinc finger protein DOF1.7 GN=F19C24.9 OS=Arabidopsis thaliana (Mouse-ear cress) PE=2 SV=1	L	Replication, recombination and repair	hypothetical protein SHCRBa_022_B01_F_250 [Saccharum hybrid cultivar R570]	cellular component: cell (GO:0005623);; cellular component: membrane-enclosed lumen (GO:0031974);; cellular component: macromolecular complex (GO:0032991);; cellular component: organelle (GO:0043226);; cellular component: organelle part (GO:0044422);; cellular component: cell part (GO:0044464);; biological process: metabolic process (GO:0008152);; biological process: cellular process (GO:0009987)…	--
BMK_Unigene_000532	C2C2-GATA	TF	39.3919	42.1245	24.8331	43.2981	35.6119	18.3365	0.399057	0.464896	normal	0.833908	-0.159815	normal	0.98957	-0.0205182	normal	0.215259	-0.864451	normal	--	--	Molecular Function: sequence-specific DNA binding transcription factor activity (GO:0003700);; Cellular Component: nucleus (GO:0005634);; Molecular Function: zinc ion binding (GO:0008270);; Biological Process: seed germination (GO:0009845);; Molecular Function: sequence-specific DNA binding (GO:0043565);; Biological Process: positive regulation of transcription, DNA-templated (GO:0045893);;	K17894|4.61134e-84|sita:101775857|GATA transcription factor 8-like; K17894 GATA-binding protein 2 (A)	[K]	Transcription	GATA zinc finger	GATA transcription factor 8 GN=GATA8 OS=Arabidopsis thaliana (Mouse-ear cress) PE=2 SV=1	K	Transcription	PREDICTED: GATA transcription factor 8-like isoform X1 [Setaria italica]	biological process: biological regulation (GO:0065007);; molecular function: nucleic acid binding transcription factor activity (GO:0001071);; cellular component: cell (GO:0005623);; cellular component: organelle (GO:0043226);; cellular component: cell part (GO:0044464);; molecular function: binding (GO:0005488);; biological process: multicellular organismal process (GO:0032501);; biological proc…	--
BMK_Unigene_004285	C2C2-GATA	TF	3.85431	0.0559589	0.631103	3.16785	0.840873	0.358207	7.42113e-08	-5.25932	down	0.00355262	-2.03383	down	0.19604	-1.50983	normal	0.000975219	-2.56	down	--	--	Molecular Function: sequence-specific DNA binding transcription factor activity (GO:0003700);; Biological Process: regulation of transcription, DNA-templated (GO:0006355);; Molecular Function: zinc ion binding (GO:0008270);; Molecular Function: sequence-specific DNA binding (GO:0043565);;	--	[K]	Transcription	GATA zinc finger	GATA transcription factor 4 GN=GATA4 OS=Arabidopsis thaliana (Mouse-ear cress) PE=2 SV=1	K	Transcription	PREDICTED: GATA transcription factor 2-like [Setaria italica]	biological process: biological regulation (GO:0065007);; molecular function: nucleic acid binding transcription factor activity (GO:0001071);; molecular function: binding (GO:0005488)	--
BMK_Unigene_005157	C2C2-GATA	TF	27.5756	22.4379	22.323	28.5582	20.2318	14.2718	0.911646	0.0778353	normal	0.774215	0.206481	normal	0.794993	-0.214053	normal	0.258572	-0.591461	normal	--	--	Molecular Function: sequence-specific DNA binding transcription factor activity (GO:0003700);; Biological Process: regulation of transcription, DNA-templated (GO:0006355);; Molecular Function: zinc ion binding (GO:0008270);; Molecular Function: sequence-specific DNA binding (GO:0043565);;	--	[K]	Transcription	GATA zinc finger	GATA transcription factor 5 GN=GATA5 OS=Arabidopsis thaliana (Mouse-ear cress) PE=2 SV=1	K	Transcription	GATA zinc finger family protein [Zea mays]	biological process: biological regulation (GO:0065007);; molecular function: nucleic acid binding transcription factor activity (GO:0001071);; molecular function: binding (GO:0005488)	--
BMK_Unigene_006558	C2C2-GATA	TF	1.84801	0.527189	0.328463	0.274486	0.250301	0.881656	0.510996	-0.939175	normal	0.0129115	-2.89372	normal	0.957355	0.233021	normal	0.392651	1.49141	normal	--	--	--	--	[K]	Transcription	GATA zinc finger	GATA transcription factor 21 GN=MPI10.2 OS=Arabidopsis thaliana (Mouse-ear cress) PE=1 SV=2	--	--	PREDICTED: putative GATA transcription factor 22-like [Setaria italica]	--	--
BMK_Unigene_013144	C2C2-GATA	TF	6.76188	3.55425	4.60737	6.71713	4.51479	4.34855	0.426242	-0.541851	normal	0.96865	-0.0314715	normal	0.751897	-0.289887	normal	0.699326	-0.245833	normal	--	--	Molecular Function: sequence-specific DNA binding transcription factor activity (GO:0003700);; Biological Process: regulation of transcription, DNA-templated (GO:0006355);; Molecular Function: zinc ion binding (GO:0008270);; Molecular Function: sequence-specific DNA binding (GO:0043565);;	--	[K]	Transcription	GATA zinc finger	GATA transcription factor 26 GN=GATA26 OS=Arabidopsis thaliana (Mouse-ear cress) PE=2 SV=1	K	Transcription	hypothetical protein SORBIDRAFT_06g024200 [Sorghum bicolor]	biological process: biological regulation (GO:0065007);; molecular function: nucleic acid binding transcription factor activity (GO:0001071);; molecular function: binding (GO:0005488)	--
BMK_Unigene_013374	C2C2-GATA	TF	45.1045	36.7872	25.6298	59.247	41.251	41.7722	0.961365	0.0430807	normal	0.735192	-0.257681	normal	0.854449	-0.143969	normal	0.896373	-0.0782132	normal	--	--	Molecular Function: sequence-specific DNA binding transcription factor activity (GO:0003700);; Cellular Component: nucleus (GO:0005634);; Molecular Function: zinc ion binding (GO:0008270);; Molecular Function: sequence-specific DNA binding (GO:0043565);; Biological Process: positive regulation of transcription, DNA-templated (GO:0045893);;	--	[K]	Transcription	GATA zinc finger	GATA transcription factor 5 GN=GATA5 OS=Arabidopsis thaliana (Mouse-ear cress) PE=2 SV=1	K	Transcription	PREDICTED: GATA transcription factor 5-like [Setaria italica]	biological process: biological regulation (GO:0065007);; molecular function: nucleic acid binding transcription factor activity (GO:0001071);; cellular component: cell (GO:0005623);; cellular component: organelle (GO:0043226);; cellular component: cell part (GO:0044464);; molecular function: binding (GO:0005488)	--
BMK_Unigene_024861	C2C2-GATA	TF	0.114956	0.33822	0.317209	0	0	0.817406	0.60326	1.36727	normal	0.650012	1.38976	normal	--	--	--	0.0328156	3.59271	normal	--	--	Molecular Function: sequence-specific DNA binding transcription factor activity (GO:0003700);; Biological Process: regulation of transcription, DNA-templated (GO:0006355);; Molecular Function: zinc ion binding (GO:0008270);; Molecular Function: sequence-specific DNA binding (GO:0043565);;	--	[K]	Transcription	GATA zinc finger	GATA transcription factor 20 GN=GATA20 OS=Arabidopsis thaliana (Mouse-ear cress) PE=2 SV=2	K	Transcription	GATA zinc finger [Colletotrichum graminicola M1.001]	biological process: biological regulation (GO:0065007);; molecular function: nucleic acid binding transcription factor activity (GO:0001071);; molecular function: binding (GO:0005488)	--
BMK_Unigene_035050	C2C2-GATA	TF	0.126534	0.258512	0.191314	0	0	0.246728	0.835506	0.671609	normal	0.904622	0.436829	normal	--	--	--	0.699326	1.01727	normal	--	--	Molecular Function: sequence-specific DNA binding transcription factor activity (GO:0003700);; Molecular Function: signal transducer activity (GO:0004871);; Biological Process: regulation of transcription, DNA-templated (GO:0006355);; Biological Process: signal transduction (GO:0007165);; Molecular Function: zinc ion binding (GO:0008270);; Molecular Function: sequence-specific DNA binding (GO:004…	--	[K]	Transcription	GATA zinc finger	GATA transcription factor 19 GN=GATA19 OS=Arabidopsis thaliana (Mouse-ear cress) PE=2 SV=2	K	Transcription	hypothetical protein FOYG_01134 [Fusarium oxysporum FOSC 3-a]	biological process: biological regulation (GO:0065007);; molecular function: nucleic acid binding transcription factor activity (GO:0001071);; biological process: cellular process (GO:0009987);; biological process: signaling (GO:0023052);; biological process: single-organism process (GO:0044699);; biological process: response to stimulus (GO:0050896);; molecular function: molecular transducer act…	--
BMK_Unigene_035384	C2C2-GATA	TF	0.114553	2.88826	0	0	0.106273	0.0349034	0.226491	3.13767	normal	--	--	--	--	--	--	--	--	--	--	--	Molecular Function: sequence-specific DNA binding transcription factor activity (GO:0003700);; Biological Process: regulation of transcription, DNA-templated (GO:0006355);; Molecular Function: zinc ion binding (GO:0008270);; Molecular Function: sequence-specific DNA binding (GO:0043565);;	--	[K]	Transcription	GATA zinc finger;; GATA zinc finger	--	S	Function unknown	hypothetical protein BN14_01053 [Rhizoctonia solani AG-1 IB]	biological process: biological regulation (GO:0065007);; molecular function: nucleic acid binding transcription factor activity (GO:0001071);; molecular function: binding (GO:0005488)	--
BMK_Unigene_036385	C2C2-GATA	TF	0.986193	0.811898	1.08129	0.874445	0.930015	0.371569	--	--	--	0.239712	3.12608	normal	0.851414	0.559416	normal	0.765607	-0.760819	normal	--	--	Molecular Function: sequence-specific DNA binding transcription factor activity (GO:0003700);; Biological Process: regulation of transcription, DNA-templated (GO:0006355);; Molecular Function: zinc ion binding (GO:0008270);; Molecular Function: sequence-specific DNA binding (GO:0043565);;	--	--	--	GATA zinc finger	--	K	Transcription	PREDICTED: GATA transcription factor 23-like [Setaria italica]	biological process: biological regulation (GO:0065007);; molecular function: nucleic acid binding transcription factor activity (GO:0001071);; molecular function: binding (GO:0005488)	--
BMK_Unigene_038039	C2C2-GATA	TF	29.8532	37.9884	29.6408	26.064	23.3685	36.5545	0.198892	0.807335	normal	0.325785	0.706541	normal	0.876716	0.187676	normal	0.156697	0.80281	normal	--	--	Molecular Function: sequence-specific DNA binding transcription factor activity (GO:0003700);; Biological Process: regulation of transcription, DNA-templated (GO:0006355);; Molecular Function: zinc ion binding (GO:0008270);; Cellular Component: cytoplasmic membrane-bounded vesicle (GO:0016023);; Molecular Function: sequence-specific DNA binding (GO:0043565);;	--	[K]	Transcription	GATA zinc finger	GATA transcription factor 23 GN=GATA23 OS=Arabidopsis thaliana (Mouse-ear cress) PE=2 SV=2	K	Transcription	PREDICTED: GATA transcription factor 23-like [Setaria italica]	biological process: biological regulation (GO:0065007);; molecular function: nucleic acid binding transcription factor activity (GO:0001071);; molecular function: binding (GO:0005488);; cellular component: cell (GO:0005623);; cellular component: organelle (GO:0043226);; cellular component: cell part (GO:0044464)	--
BMK_Unigene_044353	C2C2-GATA	TF	69.5929	56.1518	38.7838	73.4073	52.6013	65.9066	0.94982	0.0512282	normal	0.717828	-0.224094	normal	0.956839	-0.0794795	normal	0.384928	0.433492	normal	--	--	Molecular Function: sequence-specific DNA binding transcription factor activity (GO:0003700);; Biological Process: regulation of transcription, DNA-templated (GO:0006355);; Molecular Function: zinc ion binding (GO:0008270);; Molecular Function: sequence-specific DNA binding (GO:0043565);;	--	[K]	Transcription	GATA zinc finger	GATA transcription factor 5 GN=GATA5 OS=Arabidopsis thaliana (Mouse-ear cress) PE=2 SV=1	K	Transcription	PREDICTED: GATA transcription factor 5-like [Setaria italica]	biological process: biological regulation (GO:0065007);; molecular function: nucleic acid binding transcription factor activity (GO:0001071);; molecular function: binding (GO:0005488)	--
BMK_Unigene_044642	C2C2-GATA	TF	0	0.425854	0	0.0487312	0.202928	0.0494118	0.265135	2.97849	normal	--	--	--	0.755331	0.833681	normal	0.972123	0.108504	normal	--	--	Cellular Component: nuclear chromatin (GO:0000790);; Biological Process: regulation of transcription from RNA polymerase II promoter (GO:0006357);; Biological Process: cellular response to starvation (GO:0009267);; Biological Process: pathogenesis (GO:0009405);; Biological Process: filamentous growth of a population of unicellular organisms in response to starvation (GO:0036170);; Biological Proc…	--	--	--	GATA zinc finger	--	K	Transcription	Piso0_004299 [Millerozyma farinosa CBS 7064]	cellular component: cell (GO:0005623);; cellular component: membrane-enclosed lumen (GO:0031974);; cellular component: macromolecular complex (GO:0032991);; cellular component: organelle (GO:0043226);; cellular component: organelle part (GO:0044422);; cellular component: cell part (GO:0044464);; biological process: biological regulation (GO:0065007);; biological process: cellular process (GO:0009…	--
BMK_Unigene_050120	C2C2-GATA	TF	20.6887	13.4635	14.1046	21.6687	15.199	15.443	0.407601	-0.546215	normal	0.862543	-0.141529	normal	0.751897	-0.386069	normal	0.565531	-0.439032	normal	--	--	Molecular Function: sequence-specific DNA binding transcription factor activity (GO:0003700);; Biological Process: regulation of transcription, DNA-templated (GO:0006355);; Molecular Function: zinc ion binding (GO:0008270);; Molecular Function: sequence-specific DNA binding (GO:0043565);;	--	[K]	Transcription	CCT motif;; GATA zinc finger;; tify domain;; Divergent CCT motif	GATA transcription factor 24 GN=MXL8.2 OS=Arabidopsis thaliana (Mouse-ear cress) PE=2 SV=2	K	Transcription	PREDICTED: GATA transcription factor 24-like isoform X2 [Setaria italica]	biological process: biological regulation (GO:0065007);; molecular function: nucleic acid binding transcription factor activity (GO:0001071);; molecular function: binding (GO:0005488)	--
BMK_Unigene_078119	C2C2-GATA	TF	0	0	0	0	0	0.444707	--	--	--	--	--	--	--	--	--	0.699326	1.13923	normal	--	--	Molecular Function: sequence-specific DNA binding transcription factor activity (GO:0003700);; Biological Process: regulation of transcription, DNA-templated (GO:0006355);; Molecular Function: zinc ion binding (GO:0008270);; Molecular Function: sequence-specific DNA binding (GO:0043565);;	--	[K]	Transcription	GATA zinc finger	GATA transcription factor 16 GN=GATA16 OS=Arabidopsis thaliana (Mouse-ear cress) PE=2 SV=1	R	General function prediction only	GATA zinc finger domain-containing protein 7 [Beauveria bassiana D1-5]	biological process: biological regulation (GO:0065007);; molecular function: nucleic acid binding transcription factor activity (GO:0001071);; molecular function: binding (GO:0005488)	--
BMK_Unigene_083552	C2C2-GATA	TF	2.75458	2.70729	3.36816	2.65647	2.33357	1.97499	0.613943	0.465775	normal	0.147784	1.14388	normal	0.90548	0.190145	normal	0.864581	0.207916	normal	--	--	Molecular Function: sequence-specific DNA binding transcription factor activity (GO:0003700);; Biological Process: regulation of transcription, DNA-templated (GO:0006355);; Molecular Function: zinc ion binding (GO:0008270);; Molecular Function: sequence-specific DNA binding (GO:0043565);;	--	--	--	GATA zinc finger	--	K	Transcription	PREDICTED: GATA transcription factor 23-like [Setaria italica]	biological process: biological regulation (GO:0065007);; molecular function: nucleic acid binding transcription factor activity (GO:0001071);; molecular function: binding (GO:0005488)	--
BMK_Unigene_086931	C2C2-GATA	TF	0.878823	0.971893	0.769827	1.33797	0.936901	0.929702	0.861255	0.441224	normal	0.925034	0.305137	normal	0.972111	-0.156776	normal	0.974718	-0.0909262	normal	--	--	Molecular Function: sequence-specific DNA binding transcription factor activity (GO:0003700);; Biological Process: regulation of transcription, DNA-templated (GO:0006355);; Molecular Function: zinc ion binding (GO:0008270);; Cellular Component: cytoplasmic membrane-bounded vesicle (GO:0016023);; Molecular Function: sequence-specific DNA binding (GO:0043565);;	--	[K]	Transcription	GATA zinc finger	GATA transcription factor 23 GN=GATA23 OS=Arabidopsis thaliana (Mouse-ear cress) PE=2 SV=2	--	--	PREDICTED: GATA transcription factor 23-like [Setaria italica]	biological process: biological regulation (GO:0065007);; molecular function: nucleic acid binding transcription factor activity (GO:0001071);; molecular function: binding (GO:0005488);; cellular component: cell (GO:0005623);; cellular component: organelle (GO:0043226);; cellular component: cell part (GO:0044464)	--
BMK_Unigene_088032	C2C2-GATA	TF	55.3979	22.8032	25.5216	51.5003	23.7921	17.5168	0.0209599	-1.40295	normal	0.500221	-0.808231	normal	0.599156	-0.645515	normal	0.183487	-0.831197	normal	--	--	Molecular Function: sequence-specific DNA binding transcription factor activity (GO:0003700);; Biological Process: regulation of transcription, DNA-templated (GO:0006355);; Molecular Function: zinc ion binding (GO:0008270);; Molecular Function: sequence-specific DNA binding (GO:0043565);;	--	[K]	Transcription	GATA zinc finger	GATA transcription factor 16 GN=GATA16 OS=Arabidopsis thaliana (Mouse-ear cress) PE=2 SV=1	K	Transcription	PREDICTED: GATA transcription factor 16-like isoform X1 [Setaria italica]	biological process: biological regulation (GO:0065007);; molecular function: nucleic acid binding transcription factor activity (GO:0001071);; molecular function: binding (GO:0005488)	--
BMK_Unigene_089116	C2C2-GATA	TF	6.81893	8.26122	6.67293	7.14417	7.60397	7.96054	0.278305	0.629468	normal	0.512515	0.482853	normal	0.751897	0.361725	normal	0.287106	0.524081	normal	--	--	Molecular Function: sequence-specific DNA binding transcription factor activity (GO:0003700);; Biological Process: regulation of transcription, DNA-templated (GO:0006355);; Molecular Function: zinc ion binding (GO:0008270);; Molecular Function: sequence-specific DNA binding (GO:0043565);;	--	[K]	Transcription	CCT motif;; GATA zinc finger;; tify domain;; Divergent CCT motif	GATA transcription factor 24 GN=MXL8.2 OS=Arabidopsis thaliana (Mouse-ear cress) PE=2 SV=2	K	Transcription	PREDICTED: GATA transcription factor 24-like [Setaria italica]	biological process: biological regulation (GO:0065007);; molecular function: nucleic acid binding transcription factor activity (GO:0001071);; molecular function: binding (GO:0005488)	--
BMK_Unigene_089945	C2C2-GATA	TF	2.95412	1.86809	2.00816	0.94788	1.04169	1.10011	0.825048	-0.283108	normal	0.967555	-0.0668438	normal	0.903686	0.319662	normal	0.763521	0.496904	normal	--	--	Molecular Function: sequence-specific DNA binding transcription factor activity (GO:0003700);; Cellular Component: nucleus (GO:0005634);; Molecular Function: zinc ion binding (GO:0008270);; Molecular Function: sequence-specific DNA binding (GO:0043565);; Biological Process: positive regulation of transcription, DNA-templated (GO:0045893);;	--	[K]	Transcription	GATA zinc finger	GATA transcription factor 9 GN=GATA9 OS=Arabidopsis thaliana (Mouse-ear cress) PE=2 SV=1	K	Transcription	PREDICTED: GATA transcription factor 12-like [Setaria italica]	biological process: biological regulation (GO:0065007);; molecular function: nucleic acid binding transcription factor activity (GO:0001071);; cellular component: cell (GO:0005623);; cellular component: organelle (GO:0043226);; cellular component: cell part (GO:0044464);; molecular function: binding (GO:0005488)	--
BMK_Unigene_096457	C2C2-GATA	TF	0	0	0	0	0.605351	0	--	--	--	--	--	--	0.751897	0.955522	normal	--	--	--	--	--	Molecular Function: sequence-specific DNA binding transcription factor activity (GO:0003700);; Biological Process: regulation of transcription, DNA-templated (GO:0006355);; Molecular Function: zinc ion binding (GO:0008270);; Molecular Function: sequence-specific DNA binding (GO:0043565);;	--	[K]	Transcription	GATA zinc finger	--	K	Transcription	hypothetical protein TRIVIDRAFT_116843, partial [Trichoderma virens Gv29-8]	biological process: biological regulation (GO:0065007);; molecular function: nucleic acid binding transcription factor activity (GO:0001071);; molecular function: binding (GO:0005488)	--
BMK_Unigene_096523	C2C2-GATA	TF	0.855863	0	0	0.229439	0.148677	0	0.304854	-2.82643	normal	0.391969	-2.58796	normal	0.978679	-0.138275	normal	0.699326	-0.889612	normal	--	--	Molecular Function: sequence-specific DNA binding transcription factor activity (GO:0003700);; Cellular Component: nucleus (GO:0005634);; Molecular Function: zinc ion binding (GO:0008270);; Molecular Function: sequence-specific DNA binding (GO:0043565);; Biological Process: positive regulation of transcription, DNA-templated (GO:0045893);;	--	[K]	Transcription	GATA zinc finger	GATA transcription factor 2 GN=GATA2 OS=Arabidopsis thaliana (Mouse-ear cress) PE=2 SV=1	K	Transcription	PREDICTED: GATA transcription factor 2-like [Setaria italica]	biological process: biological regulation (GO:0065007);; molecular function: nucleic acid binding transcription factor activity (GO:0001071);; cellular component: cell (GO:0005623);; cellular component: organelle (GO:0043226);; cellular component: cell part (GO:0044464);; molecular function: binding (GO:0005488)	--
BMK_Unigene_099563	C2C2-GATA	TF	0	0	0.0972219	0	0	0.185714	--	--	--	--	--	--	--	--	--	0.699326	0.884835	normal	--	--	Molecular Function: sequence-specific DNA binding transcription factor activity (GO:0003700);; Biological Process: regulation of transcription, DNA-templated (GO:0006355);; Molecular Function: zinc ion binding (GO:0008270);; Molecular Function: sequence-specific DNA binding (GO:0043565);;	--	[K]	Transcription	GATA zinc finger	--	K	Transcription	hypothetical protein PTT_14475 [Pyrenophora teres f. teres 0-1]	biological process: biological regulation (GO:0065007);; molecular function: nucleic acid binding transcription factor activity (GO:0001071);; molecular function: binding (GO:0005488)	--
BMK_Unigene_100038	C2C2-GATA	TF	0	0	0.100487	0	0.0943103	0.278771	--	--	--	--	--	--	--	--	--	0.699326	0.965541	normal	--	--	--	--	[K]	Transcription	GATA zinc finger	GATA transcription factor 10 GN=GATA10 OS=Arabidopsis thaliana (Mouse-ear cress) PE=2 SV=1	S	Function unknown	PREDICTED: GATA transcription factor 15-like [Sesamum indicum]	--	--
BMK_Unigene_103991	C2C2-GATA	TF	0	0.198357	0	0.0973782	0	0	0.60326	1.45015	normal	--	--	--	--	--	--	--	--	--	--	--	--	--	[B]	Chromatin structure and dynamics	GATA zinc finger	--	B	Chromatin structure and dynamics	--	--	--
BMK_Unigene_105220	C2C2-GATA	TF	0	0.0977682	0.393146	0	0.18735	0	--	--	--	0.63683	1.7023	normal	0.751897	0.806257	normal	--	--	--	[K]	Transcription	Molecular Function: sequence-specific DNA binding transcription factor activity (GO:0003700);; Molecular Function: signal transducer activity (GO:0004871);; Biological Process: regulation of transcription, DNA-templated (GO:0006355);; Biological Process: signal transduction (GO:0007165);; Molecular Function: zinc ion binding (GO:0008270);; Molecular Function: sequence-specific DNA binding (GO:004…	--	[K]	Transcription	GATA zinc finger	GATA transcription factor 20 GN=GATA20 OS=Arabidopsis thaliana (Mouse-ear cress) PE=2 SV=2	K	Transcription	putative white collar 1 protein [Togninia minima UCRPA7]	biological process: biological regulation (GO:0065007);; molecular function: nucleic acid binding transcription factor activity (GO:0001071);; biological process: cellular process (GO:0009987);; biological process: signaling (GO:0023052);; biological process: single-organism process (GO:0044699);; biological process: response to stimulus (GO:0050896);; molecular function: molecular transducer act…	--
BMK_Unigene_011459	C2C2-LSD	TF	8.6992	13.6321	11.7827	6.29508	7.40028	10.9765	0.0778507	0.930635	normal	0.298532	0.897966	normal	0.751897	0.518533	normal	0.0402076	1.13468	normal	--	--	Cellular Component: nucleus (GO:0005634);; Biological Process: response to stress (GO:0006950);; Biological Process: signal transduction (GO:0007165);; Biological Process: response to hormone (GO:0009725);; Biological Process: programmed cell death (GO:0012501);; Biological Process: regulation of cellular metabolic process (GO:0031323);; Biological Process: cellular response to organic substance …	--	--	--	LSD1 zinc finger	Protein LOL4 OS=Oryza sativa subsp. japonica (Rice) PE=2 SV=1	S	Function unknown	PREDICTED: protein LOL4-like isoform X3 [Setaria italica]	cellular component: cell (GO:0005623);; cellular component: organelle (GO:0043226);; cellular component: cell part (GO:0044464);; biological process: response to stimulus (GO:0050896);; biological process: cellular process (GO:0009987);; biological process: signaling (GO:0023052);; biological process: single-organism process (GO:0044699);; biological process: biological regulation (GO:0065007)	--
BMK_Unigene_042672	C2C2-LSD	TF	6.62353	14.636	11.3172	10.0386	11.1856	7.26707	0.39587	1.00584	normal	0.348996	1.12899	normal	0.751897	1.10678	normal	0.820608	0.5056	normal	--	--	Biological Process: response to superoxide (GO:0000303);; Biological Process: response to hypoxia (GO:0001666);; Biological Process: response to molecule of oomycetes origin (GO:0002240);; Cellular Component: ribosome (GO:0005840);; Biological Process: plant-type hypersensitive response (GO:0009626);; Biological Process: systemic acquired resistance, salicylic acid mediated signaling pathway (GO:…	--	--	--	LSD1 zinc finger;; Mu-like prophage protein Com	Protein LOL2 GN=OsJ_36836 OS=Oryza sativa subsp. japonica (Rice) PE=2 SV=1	S	Function unknown	TPA: hypothetical protein ZEAMMB73_703800 [Zea mays]	biological process: response to stimulus (GO:0050896);; biological process: multi-organism process (GO:0051704);; cellular component: cell (GO:0005623);; cellular component: macromolecular complex (GO:0032991);; cellular component: organelle (GO:0043226);; cellular component: cell part (GO:0044464);; biological process: immune system process (GO:0002376);; biological process: cellular process (GO…	--
BMK_Unigene_043202	C2C2-LSD	TF	56.1621	59.1445	35.8581	24.4875	27.9038	39.3393	0.415864	0.613941	normal	0.786838	0.257932	normal	0.994633	-0.0116714	normal	0.209148	1.07635	normal	--	--	Molecular Function: DNA binding (GO:0003677);; Cellular Component: nucleus (GO:0005634);; Biological Process: apoptotic process (GO:0006917);; Biological Process: defense response, incompatible interaction (GO:0009814);; Biological Process: negative regulation of plant-type hypersensitive response (GO:0034051);; Biological Process: positive regulation of plant-type hypersensitive response (GO:003…	--	--	--	LSD1 zinc finger;; LSD1 zinc finger	Protein LSD1 GN=OsJ_26122 OS=Oryza sativa subsp. japonica (Rice) PE=2 SV=1	S	Function unknown	hypothetical protein ZEAMMB73_950191 [Zea mays]	molecular function: binding (GO:0005488);; cellular component: cell (GO:0005623);; cellular component: organelle (GO:0043226);; cellular component: cell part (GO:0044464);; biological process: immune system process (GO:0002376);; biological process: response to stimulus (GO:0050896);; biological process: multi-organism process (GO:0051704);; biological process: biological regulation (GO:0065007)	--
BMK_Unigene_082147	C2C2-LSD	TF	16.9889	30.5795	21.6088	20.6229	20.7347	20.7187	0.00164153	1.14605	up	0.109145	0.771785	normal	0.826212	0.247653	normal	0.556448	0.462252	normal	--	--	Biological Process: response to superoxide (GO:0000303);; Biological Process: response to hypoxia (GO:0001666);; Biological Process: response to molecule of oomycetes origin (GO:0002240);; Cellular Component: nucleus (GO:0005634);; Biological Process: plant-type hypersensitive response (GO:0009626);; Biological Process: systemic acquired resistance, salicylic acid mediated signaling pathway (GO:0…	--	--	--	LSD1 zinc finger	Protein LOL3 OS=Oryza sativa subsp. japonica (Rice) PE=2 SV=1	S	Function unknown	PREDICTED: protein LOL3-like [Setaria italica]	biological process: response to stimulus (GO:0050896);; biological process: multi-organism process (GO:0051704);; cellular component: cell (GO:0005623);; cellular component: organelle (GO:0043226);; cellular component: cell part (GO:0044464);; biological process: immune system process (GO:0002376);; biological process: cellular process (GO:0009987);; biological process: single-organism process (G…	--
BMK_Unigene_086231	C2C2-LSD	TF	59.4042	62.1951	37.4913	25.3194	29.6083	40.6674	0.467787	0.565904	normal	0.996054	0.00511813	normal	0.857247	0.34035	normal	0.210807	1.18392	normal	--	--	Molecular Function: DNA binding (GO:0003677);; Cellular Component: nucleus (GO:0005634);; Biological Process: apoptotic process (GO:0006917);; Biological Process: defense response, incompatible interaction (GO:0009814);; Biological Process: negative regulation of plant-type hypersensitive response (GO:0034051);; Biological Process: positive regulation of plant-type hypersensitive response (GO:003…	--	--	--	LSD1 zinc finger	Protein LSD1 GN=OsJ_26122 OS=Oryza sativa subsp. japonica (Rice) PE=2 SV=1	S	Function unknown	PREDICTED: LOW QUALITY PROTEIN: protein LSD1-like [Setaria italica]	molecular function: binding (GO:0005488);; cellular component: cell (GO:0005623);; cellular component: organelle (GO:0043226);; cellular component: cell part (GO:0044464);; biological process: immune system process (GO:0002376);; biological process: response to stimulus (GO:0050896);; biological process: multi-organism process (GO:0051704);; biological process: biological regulation (GO:0065007)	--
BMK_Unigene_000256	C2H2	TF	0	3.84527	0.0666596	0.254533	0.0625229	0.0616425	0.000389504	5.96441	up	--	--	--	0.90045	-0.42185	normal	0.861536	-0.472899	normal	[R]	General function prediction only	Molecular Function: nucleic acid binding (GO:0003676);; Molecular Function: metal ion binding (GO:0046872);;	--	[R]	General function prediction only	Zinc finger, C2H2 type;; Zinc-finger double domain	Probable lysine-specific demethylase ELF6 GN=F21E1.160 OS=Arabidopsis thaliana (Mouse-ear cress) PE=1 SV=1	K	Transcription	pH-response transcription factor pacC/RIM101 OS=Cryptococcus neoformans var, neoformans serotype D (strain JEC21 / ATCC MYA-565) GN=RIM101 PE=3 SV=1 [Rhizoctonia solani AG-1 IB]	molecular function: binding (GO:0005488)	--
BMK_Unigene_000421	C2H2	TF	0	0	3.01477	0	0.074558	0	--	--	--	0.377338	2.64088	normal	0.751897	0.861298	normal	--	--	--	[R]	General function prediction only	Molecular Function: nucleic acid binding (GO:0003676);; Molecular Function: metal ion binding (GO:0046872);;	--	[R]	General function prediction only	Zinc finger, C2H2 type;; C2H2-type zinc finger;; Zinc-finger double domain	--	R	General function prediction only	hypothetical protein PFICI_01825 [Pestalotiopsis fici W106-1]	molecular function: binding (GO:0005488)	--
BMK_Unigene_000464	C2H2	TF	0.0401837	1.73454	2.17969	0	0	0.373341	0.0161134	4.3358	normal	0.0138221	4.5377	normal	--	--	--	0.280654	2.35007	normal	[R]	General function prediction only	Molecular Function: DNA binding (GO:0003677);; Cellular Component: nucleus (GO:0005634);; Cellular Component: cytoplasm (GO:0005737);; Biological Process: regulation of transcription, DNA-templated (GO:0006355);; Molecular Function: metal ion binding (GO:0046872);;	--	[R]	General function prediction only	Zinc finger, C2H2 type;; Zinc-finger double domain;; C2H2-type zinc finger	--	K	Transcription	unnamed protein product [Fusarium graminearum]	molecular function: binding (GO:0005488);; cellular component: cell (GO:0005623);; cellular component: organelle (GO:0043226);; cellular component: cell part (GO:0044464);; biological process: biological regulation (GO:0065007)	--
BMK_Unigene_001095	C2H2	TF	26.1321	43	42.3408	20.8067	32.9479	27.1669	0.0108533	1.08061	normal	0.00102042	1.20769	up	0.0772695	0.933413	normal	0.0342737	0.755077	normal	[O]	Posttranslational modification, protein turnover, chaperones	Molecular Function: nucleic acid binding (GO:0003676);; Molecular Function: allantoin uptake transmembrane transporter activity (GO:0005274);; Cellular Component: plasma membrane (GO:0005886);; Biological Process: protein folding (GO:0006457);; Molecular Function: zinc ion binding (GO:0008270);; Cellular Component: chloroplast (GO:0009507);; Molecular Function: uracil:cation symporter activity (G…	--	--	--	DnaJ domain;; Zinc-finger double-stranded RNA-binding;; Zinc-finger of C2H2 type;; C2H2 type zinc-finger (2 copies);; Ureide permease;; Sugar transport protein	Ureide permease 2 GN=UPS2 OS=Arabidopsis thaliana (Mouse-ear cress) PE=2 SV=2	O	Posttranslational modification, protein turnover, chaperones	PREDICTED: ureide permease 2-like [Setaria italica]	molecular function: binding (GO:0005488);; biological process: cellular process (GO:0009987);; biological process: single-organism process (GO:0044699);; biological process: localization (GO:0051179);; molecular function: transporter activity (GO:0005215);; cellular component: cell (GO:0005623);; cellular component: membrane (GO:0016020);; cellular component: cell part (GO:0044464);; biological p…	--
BMK_Unigene_001394	C2H2	TF	2.02555	0.736748	0.395996	0	0.0719066	0	0.575622	-0.990669	normal	0.160085	-1.72214	normal	0.751897	0.907891	normal	--	--	--	--	--	Biological Process: transcription, DNA-templated (GO:0006351);;	--	--	--	--	--	R	General function prediction only	hypothetical protein CHGG_07302 [Chaetomium globosum CBS 148.51]	biological process: metabolic process (GO:0008152);; biological process: cellular process (GO:0009987)	--
BMK_Unigene_001516	C2H2	TF	5.74347	10.4983	7.88371	0.0734533	2.07421	0.0397961	0.157813	1.21582	normal	0.532236	0.966207	normal	0.0127199	3.68051	normal	0.913475	-0.334464	normal	[R]	General function prediction only	Biological Process: pathogenesis (GO:0009405);;	--	[R]	General function prediction only	Zinc finger, C2H2 type;; C2H2-type zinc finger;; Zinc-finger of C2H2 type;; Zinc-finger double-stranded RNA-binding;; Zinc-finger double domain	--	--	--	putative cutinase g-box binding protein [Togninia minima UCRPA7]	biological process: multi-organism process (GO:0051704)	--
BMK_Unigene_002525	C2H2	TF	0.537338	0	0.0134652	4.48375	0.766158	1.89259	0.0071214	-4.9922	down	0.0334457	-3.72095	normal	0.298902	-1.90066	normal	0.598236	-0.847628	normal	[R]	General function prediction only	Molecular Function: nucleic acid binding (GO:0003676);; Molecular Function: sequence-specific DNA binding transcription factor activity (GO:0003700);; Cellular Component: nucleus (GO:0005634);; Biological Process: regulation of transcription, DNA-templated (GO:0006355);;	--	[R]	General function prediction only	C2H2-type zinc finger;; Zinc finger, C2H2 type	--	R	General function prediction only	hypothetical protein COCVIDRAFT_25849 [Bipolaris victoriae FI3]	molecular function: binding (GO:0005488);; biological process: biological regulation (GO:0065007);; molecular function: nucleic acid binding transcription factor activity (GO:0001071);; cellular component: cell (GO:0005623);; cellular component: organelle (GO:0043226);; cellular component: cell part (GO:0044464)	--
BMK_Unigene_002743	C2H2	TF	0.238117	0	0	0.612089	0.417643	2.0303	0.143415	-3.49961	normal	0.195894	-3.29048	normal	0.962323	-0.195691	normal	0.0157577	1.95632	normal	--	--	Molecular Function: nucleic acid binding (GO:0003676);; Molecular Function: metal ion binding (GO:0046872);;	--	[R]	General function prediction only	Zinc finger, C2H2 type	--	--	--	hypothetical protein COCCADRAFT_29955 [Bipolaris zeicola 26-R-13]	molecular function: binding (GO:0005488)	--
BMK_Unigene_002838	C2H2	TF	4.35152	5.07765	2.82369	2.96338	3.45879	3.73309	0.60326	1.13912	normal	0.980548	-0.068425	normal	0.932074	-0.278799	normal	0.978771	-0.0628369	normal	--	--	Molecular Function: nucleic acid binding (GO:0003676);; Molecular Function: sequence-specific DNA binding transcription factor activity (GO:0003700);; Biological Process: regulation of transcription, DNA-templated (GO:0006355);; Molecular Function: zinc ion binding (GO:0008270);; Cellular Component: chloroplast (GO:0009507);;	--	--	--	NYN domain	--	--	--	hypothetical protein SORBIDRAFT_10g004570 [Sorghum bicolor]	molecular function: binding (GO:0005488);; biological process: biological regulation (GO:0065007);; molecular function: nucleic acid binding transcription factor activity (GO:0001071);; cellular component: cell (GO:0005623);; cellular component: organelle (GO:0043226);; cellular component: cell part (GO:0044464)	--
BMK_Unigene_002859	C2H2	TF	9.31459	12.2719	13.5227	8.42856	11.6575	11.3728	0.0706752	0.767789	normal	0.0711066	1.06993	normal	0.27965	0.731098	normal	0.02697	0.798047	normal	--	--	Molecular Function: nucleic acid binding (GO:0003676);; Molecular Function: metal ion binding (GO:0046872);;	--	[R]	General function prediction only	--	Zinc finger protein MAGPIE {ECO:0000303|PubMed:17785527} OS=Arabidopsis thaliana (Mouse-ear cress) PE=1 SV=1	--	--	PREDICTED: splicing factor, arginine/serine-rich 19-like [Setaria italica]	molecular function: binding (GO:0005488)	--
BMK_Unigene_002879	C2H2	TF	4.06593	1.87311	2.44845	3.99811	2.13254	2.70168	0.559857	-0.656308	normal	0.650012	-0.509331	normal	0.821557	-0.38969	normal	0.771467	-0.310124	normal	--	--	Molecular Function: binding (GO:0005488);; Cellular Component: nucleus (GO:0005634);;	--	[R]	General function prediction only	--	Zinc finger protein MAGPIE {ECO:0000303|PubMed:17785527} OS=Arabidopsis thaliana (Mouse-ear cress) PE=1 SV=1	--	--	PREDICTED: zinc finger protein NUTCRACKER-like [Setaria italica]	molecular function: binding (GO:0005488);; cellular component: cell (GO:0005623);; cellular component: organelle (GO:0043226);; cellular component: cell part (GO:0044464)	--
BMK_Unigene_004062	C2H2	TF	1.45492	1.18486	4.52036	0.153023	0.0601411	8.01801	0.96961	0.0809039	normal	0.390212	1.84756	normal	0.938145	-0.299434	normal	0.558888	1.58158	normal	[J]	Translation, ribosomal structure and biogenesis	Molecular Function: structural constituent of ribosome (GO:0003735);; Cellular Component: ribosome (GO:0005840);; Biological Process: translation (GO:0006412);;	K02921|3.11649e-39|csl:COCSUDRAFT_33375|60S ribosomal protein L37a; K02921 large subunit ribosomal protein L37Ae (A)	[J]	Translation, ribosomal structure and biogenesis	Ribosomal L37ae protein family	60S ribosomal protein L37a GN=RPL37A OS=Pseudotsuga menziesii (Douglas-fir) PE=3 SV=1	J	Translation, ribosomal structure and biogenesis	60S ribosomal protein L43 [Verticillium alfalfae VaMs.102]	molecular function: structural molecule activity (GO:0005198);; cellular component: cell (GO:0005623);; cellular component: macromolecular complex (GO:0032991);; cellular component: organelle (GO:0043226);; cellular component: cell part (GO:0044464);; biological process: metabolic process (GO:0008152);; biological process: cellular process (GO:0009987)	Ribosome (ko03010)
BMK_Unigene_004650	C2H2	TF	6.47995	36.0468	31.1454	9.90562	24.2036	21.556	2.79347e-07	2.79102	up	1.72762e-07	2.71029	up	0.227617	1.43933	normal	0.0237443	1.41391	normal	--	--	Molecular Function: binding (GO:0005488);;	--	[R]	General function prediction only	C2H2-type zinc finger	Zinc finger protein AZF1 GN=K8K14.19 OS=Arabidopsis thaliana (Mouse-ear cress) PE=2 SV=1	--	--	PREDICTED: zinc finger protein 1-like [Setaria italica]	molecular function: binding (GO:0005488)	--
BMK_Unigene_004662	C2H2	TF	2.57365	0	0	8.19417	5.76846	27.0134	0.173397	-3.42648	normal	0.236263	-3.18358	normal	0.964673	-0.184274	normal	0.0529669	1.86807	normal	--	--	--	--	[R]	General function prediction only	C2H2-type zinc finger;; Zinc finger, C2H2 type	--	--	--	hypothetical protein V496_05745 [Pseudogymnoascus pannorum VKM F-4515 (FW-2607)]	--	--
BMK_Unigene_004998	C2H2	TF	6.92789	0.989328	2.88601	4.10893	3.04744	2.46972	0.000146987	-2.41432	down	0.421716	-0.84113	normal	0.854663	-0.291928	normal	0.66471	-0.560899	normal	[QR]	--	Biological Process: karyogamy (GO:0000741);; Biological Process: RNA methylation (GO:0001510);; Cellular Component: cytosol (GO:0005829);; Biological Process: protein methylation (GO:0006479);; Molecular Function: zinc ion binding (GO:0008270);; Molecular Function: protein methyltransferase activity (GO:0008276);; Biological Process: pyrimidine ribonucleotide biosynthetic process (GO:0009220);; B…	K11436|0|sita:101760213|probable protein arginine N-methyltransferase 3-like; K11436 protein arginine N-methyltransferase 3 [EC:2.1.1.-] (A)	[OKT]	--	Methyltransferase domain;; Methyltransferase domain;; Methyltransferase domain;; Ribosomal protein L11 methyltransferase (PrmA);; Methyltransferase domain;; C2H2 type zinc-finger (2 copies);; Methyltransferase domain;; Methyltransferase small domain	Probable protein arginine N-methyltransferase 3 OS=Oryza sativa subsp. japonica (Rice) PE=2 SV=1	--	--	PREDICTED: probable protein arginine N-methyltransferase 3-like [Setaria italica]	biological process: cellular process (GO:0009987);; biological process: cellular component organization or biogenesis (GO:0071840);; biological process: metabolic process (GO:0008152);; cellular component: cell (GO:0005623);; cellular component: cell part (GO:0044464);; molecular function: binding (GO:0005488);; molecular function: catalytic activity (GO:0003824);; biological process: single-orga…	--
BMK_Unigene_005286	C2H2	TF	106.501	196.476	113.299	146.407	170.721	106.742	0.0403206	1.23368	normal	0.573791	0.615741	normal	0.755069	0.433414	normal	0.933183	-0.113169	normal	--	--	Molecular Function: nucleic acid binding (GO:0003676);; Molecular Function: sequence-specific DNA binding transcription factor activity (GO:0003700);; Cellular Component: intracellular (GO:0005622);; Biological Process: regulation of transcription, DNA-templated (GO:0006355);; Molecular Function: zinc ion binding (GO:0008270);;	--	[R]	General function prediction only	C2H2-type zinc finger;; C2H2-type zinc finger;; Zinc finger, C2H2 type	Zinc finger protein 1 OS=Triticum aestivum (Wheat) PE=2 SV=1	K	Transcription	unknown [Zea mays]	molecular function: binding (GO:0005488);; biological process: biological regulation (GO:0065007);; molecular function: nucleic acid binding transcription factor activity (GO:0001071);; cellular component: cell (GO:0005623);; cellular component: cell part (GO:0044464)	--
BMK_Unigene_005480	C2H2	TF	17.6806	11.9784	13.5433	18.9441	15.4886	12.598	0.60326	-0.264423	normal	0.936563	0.0668344	normal	0.99174	0.0106055	normal	0.917218	-0.0716723	normal	[RTKL]	--	Molecular Function: protein serine/threonine kinase activity (GO:0004674);; Molecular Function: ATP binding (GO:0005524);; Cellular Component: endoplasmic reticulum membrane (GO:0005789);; Biological Process: protein phosphorylation (GO:0006468);; Biological Process: gibberellin biosynthetic process (GO:0009686);; Biological Process: response to ethylene (GO:0009723);; Biological Process: respons…	K14400|0|sita:101753577|uncharacterized LOC101753577; K14400 pre-mRNA cleavage complex 2 protein Pcf11 (A)	[T]	Signal transduction mechanisms	Ethylene-responsive protein kinase Le-CTR1;; Protein tyrosine kinase;; Protein kinase domain	Serine/threonine-protein kinase CTR1 GN=CTR1 OS=Arabidopsis thaliana (Mouse-ear cress) PE=1 SV=1	A	RNA processing and modification	PREDICTED: uncharacterized protein LOC101753577 [Setaria italica]	biological process: metabolic process (GO:0008152);; biological process: cellular process (GO:0009987);; molecular function: catalytic activity (GO:0003824);; molecular function: binding (GO:0005488);; cellular component: cell (GO:0005623);; cellular component: membrane (GO:0016020);; cellular component: organelle (GO:0043226);; cellular component: organelle part (GO:0044422);; cellular component…	mRNA surveillance pathway (ko03015)
BMK_Unigene_005593	C2H2	TF	4.1916	8.45009	2.15134	13.9834	6.64627	4.32027	0.786824	0.334085	normal	0.0882456	-1.86023	normal	0.0376334	-1.94887	normal	8.27018e-05	-2.62187	down	--	--	Molecular Function: metal ion binding (GO:0046872);;	--	[R]	General function prediction only	C2H2-type zinc finger;; Zinc-finger double-stranded RNA-binding;; Zinc-finger double domain	Zinc finger protein ZAT10 GN=T22C5.18 OS=Arabidopsis thaliana (Mouse-ear cress) PE=2 SV=1	R	General function prediction only	PREDICTED: zinc finger protein ZAT6-like [Zea mays]	molecular function: binding (GO:0005488)	--
BMK_Unigene_005618	C2H2	TF	9.95374	9.72953	8.02382	9.28303	8.16296	7.08729	0.60326	0.340326	normal	0.742374	0.209251	normal	0.959082	0.0779385	normal	0.98014	-0.0180743	normal	[R]	General function prediction only	Molecular Function: nucleic acid binding (GO:0003676);; Cellular Component: mitochondrion (GO:0005739);; Molecular Function: metal ion binding (GO:0046872);;	--	[R]	General function prediction only	Zinc finger, C2H2 type;; C2H2-type zinc finger;; Zinc-finger double domain	Uncharacterized zinc finger protein At4g06634 GN=At4g06634 OS=Arabidopsis thaliana (Mouse-ear cress) PE=1 SV=1	R	General function prediction only	PREDICTED: uncharacterized zinc finger protein At4g06634-like [Setaria italica]	molecular function: binding (GO:0005488);; cellular component: cell (GO:0005623);; cellular component: organelle (GO:0043226);; cellular component: cell part (GO:0044464)	--
BMK_Unigene_005727	C2H2	TF	3.34058	10.2999	2.30054	0.208461	0.951276	0.0275981	0.503584	1.60676	normal	0.97672	-0.0659027	normal	0.521922	1.90081	normal	0.514773	-1.70373	normal	--	--	--	--	--	--	Zinc finger, C2H2 type;; C2H2-type zinc finger	--	--	--	putative 26s proteasome regulatory subunit-like protein [Togninia minima UCRPA7]	--	--
BMK_Unigene_005728	C2H2	TF	3.64502	11.804	1.88278	0.112446	0.752694	0.027807	0.469166	1.70379	normal	0.74757	-0.667807	normal	0.186451	2.84128	normal	--	--	--	--	--	Molecular Function: metal ion binding (GO:0046872);;	--	--	--	Zinc finger, C2H2 type;; C2H2-type zinc finger	--	--	--	putative 26s proteasome regulatory subunit-like protein [Togninia minima UCRPA7]	molecular function: binding (GO:0005488)	--
BMK_Unigene_006339	C2H2	TF	9.34796	14.2655	7.85957	10.2827	12.8257	9.89741	0.0478477	0.969157	normal	0.749427	0.250997	normal	0.590425	0.597264	normal	0.654934	0.316982	normal	--	--	Molecular Function: nucleic acid binding (GO:0003676);; Cellular Component: intracellular (GO:0005622);; Molecular Function: zinc ion binding (GO:0008270);;	--	[U]	Intracellular trafficking, secretion, and vesicular transport	--	--	U	Intracellular trafficking, secretion, and vesicular transport	PREDICTED: zinc finger protein 511-like [Setaria italica]	molecular function: binding (GO:0005488);; cellular component: cell (GO:0005623);; cellular component: cell part (GO:0044464)	--
BMK_Unigene_006673	C2H2	TF	3.61194	16.7667	27.4018	0.83303	12.0224	3.7998	1.00586e-06	2.5394	up	7.225e-12	3.34438	up	5.17011e-05	3.6546	up	0.000131073	2.44195	up	--	--	Molecular Function: metal ion binding (GO:0046872);;	--	[R]	General function prediction only	C2H2-type zinc finger;; Zinc finger, C2H2 type	Zinc finger protein ZAT12 GN=MMN10.11 OS=Arabidopsis thaliana (Mouse-ear cress) PE=2 SV=1	--	--	PREDICTED: zinc finger protein ZAT12-like [Setaria italica]	molecular function: binding (GO:0005488)	--
BMK_Unigene_006810	C2H2	TF	1.3706	1.03654	0.937017	0.418346	0.39998	0.492091	0.986608	-0.0225144	normal	0.978623	-0.038224	normal	0.95701	0.185211	normal	0.743595	0.52136	normal	--	--	--	--	--	--	Zinc finger, C2H2 type;; C2H2-type zinc finger;; C2H2-type zinc finger;; Zinc-finger double-stranded RNA-binding;; Zinc-finger of C2H2 type	--	--	--	PREDICTED: zinc finger protein ZAT1-like [Setaria italica]	--	--
BMK_Unigene_007033	C2H2	TF	5.6541	1.53772	1.57489	22.7306	11.4148	9.73994	0.01737	-1.41113	normal	0.00199147	-1.82887	down	0.213808	-0.712617	normal	0.0432096	-0.782105	normal	--	--	Cellular Component: plastid (GO:0009536);;	--	[L]	Replication, recombination and repair	Myb/SANT-like DNA-binding domain;; DDE superfamily endonuclease	--	L	Replication, recombination and repair	hypothetical protein OsI_39087 [Oryza sativa Indica Group]	cellular component: cell (GO:0005623);; cellular component: organelle (GO:0043226);; cellular component: cell part (GO:0044464)	--
BMK_Unigene_008068	C2H2	TF	2.94339	0.0404654	0.100734	10.1871	5.2539	6.87068	3.81254e-07	-5.30825	down	0.000330392	-3.94041	down	0.925052	-0.390911	normal	0.879682	-0.222944	normal	[R]	General function prediction only	Molecular Function: nucleic acid binding (GO:0003676);; Molecular Function: metal ion binding (GO:0046872);;	--	[R]	General function prediction only	Zinc finger, C2H2 type;; C2H2-type zinc finger;; Zinc-finger double-stranded RNA-binding;; Zinc-finger double domain;; Zinc-finger of C2H2 type	--	K	Transcription	hypothetical protein PTT_06877 [Pyrenophora teres f. teres 0-1]	molecular function: binding (GO:0005488)	--
BMK_Unigene_008445	C2H2	TF	17.0107	17.1586	10.5364	23.8702	17.3654	16.2935	0.564133	0.3874	normal	0.82128	-0.165995	normal	0.867197	-0.180008	normal	0.776175	-0.183664	normal	--	--	Biological Process: response to stress (GO:0006950);; Molecular Function: zinc ion binding (GO:0008270);;	--	[R]	General function prediction only	AN1-like Zinc finger	Zinc finger AN1 and C2H2 domain-containing stress-associated protein 16 GN=OJ1019_E02.22 OS=Oryza sativa subsp. japonica (Rice) PE=2 SV=2	R	General function prediction only	unknown [Zea mays]	biological process: response to stimulus (GO:0050896);; molecular function: binding (GO:0005488)	--
BMK_Unigene_008845	C2H2	TF	0.560755	0	0	1.61562	0.399225	0.817249	0.00441787	-5.17546	down	0.00756931	-4.94969	down	0.6633	-1.37197	normal	0.699326	-0.598877	normal	[R]	General function prediction only	Molecular Function: nucleic acid binding (GO:0003676);; Molecular Function: metal ion binding (GO:0046872);;	--	[R]	General function prediction only	Zinc-finger double domain;; Zinc finger, C2H2 type;; C2H2-type zinc finger;; Zinc-finger double-stranded RNA-binding;; Zinc-finger of C2H2 type	Probable lysine-specific demethylase ELF6 GN=F21E1.160 OS=Arabidopsis thaliana (Mouse-ear cress) PE=1 SV=1	--	--	hypothetical protein LEMA_P046340.1 [Leptosphaeria maculans JN3]	molecular function: binding (GO:0005488)	--
BMK_Unigene_008877	C2H2	TF	7.43493	5.9635	4.01133	11.1922	4.92069	7.41852	0.94847	0.0538518	normal	0.650012	-0.34779	normal	0.311094	-0.889662	normal	0.720319	-0.20893	normal	[R]	General function prediction only	Molecular Function: sequence-specific DNA binding transcription factor activity (GO:0003700);; Cellular Component: nucleolus (GO:0005730);; Biological Process: regulation of transcription, DNA-templated (GO:0006355);; Molecular Function: 5S rRNA binding (GO:0008097);; Molecular Function: metal ion binding (GO:0046872);; Molecular Function: 5S rDNA binding (GO:0080084);;	K09191|1.23147e-172|sita:101767413|zinc finger protein 729-like; K09191 general transcription factor IIIA (A)	[R]	General function prediction only	Zinc finger, C2H2 type;; Zinc-finger double domain;; Zinc finger, C2H2 type;; C2H2-type zinc finger	Uncharacterized zinc finger protein At4g06634 GN=At4g06634 OS=Arabidopsis thaliana (Mouse-ear cress) PE=1 SV=1	--	--	PREDICTED: zinc finger protein 729-like [Setaria italica]	biological process: biological regulation (GO:0065007);; molecular function: nucleic acid binding transcription factor activity (GO:0001071);; cellular component: cell (GO:0005623);; cellular component: membrane-enclosed lumen (GO:0031974);; cellular component: organelle (GO:0043226);; cellular component: organelle part (GO:0044422);; cellular component: cell part (GO:0044464);; molecular functio…	--
BMK_Unigene_009640	C2H2	TF	1.52051	1.86834	0.512372	0	0.231676	0	0.746797	0.596068	normal	0.65547	-0.865716	normal	0.417875	2.24656	normal	--	--	--	[R]	General function prediction only	Molecular Function: nucleic acid binding (GO:0003676);; Biological Process: transcription, DNA-templated (GO:0006351);;	--	[R]	General function prediction only	Zinc-finger double domain;; Zinc finger, C2H2 type;; C2H2-type zinc finger	Lysine-specific demethylase SE14 GN=SE14 OS=Oryza sativa subsp. japonica (Rice) PE=3 SV=2	R	General function prediction only	CREA_GIBFU DNA-binding protein creA (Carbon catabolite repressor) [Fusarium graminearum PH-1]	molecular function: binding (GO:0005488);; biological process: metabolic process (GO:0008152);; biological process: cellular process (GO:0009987)	--
BMK_Unigene_009685	C2H2	TF	0.249892	0.525932	0.518805	0.0241956	0	2.08185	0.595388	1.25818	normal	0.628549	1.38043	normal	0.751897	-0.722927	normal	0.385073	2.0345	normal	[R]	General function prediction only	Molecular Function: nucleic acid binding (GO:0003676);;	--	[R]	General function prediction only	Zinc-finger double domain;; C2H2-type zinc finger;; Zinc finger, C2H2 type	Lysine-specific demethylase SE14 GN=SE14 OS=Oryza sativa subsp. japonica (Rice) PE=3 SV=2	K	Transcription	hypothetical protein GLRG_06078 [Colletotrichum graminicola M1.001]	molecular function: binding (GO:0005488)	--
BMK_Unigene_009989	C2H2	TF	4.09287	2.96832	1.72559	3.11019	2.11311	1.60078	0.920403	-0.0864114	normal	0.360114	-0.719694	normal	0.774469	-0.284057	normal	0.46529	-0.575804	normal	[R]	General function prediction only	Molecular Function: binding (GO:0005488);; Cellular Component: intracellular (GO:0005622);; Biological Process: primary metabolic process (GO:0044238);; Biological Process: cellular macromolecule metabolic process (GO:0044260);; Biological Process: single-organism process (GO:0044699);; Biological Process: regulation of biological process (GO:0050789);; Biological Process: response to stimulus (G…	--	[R]	General function prediction only	Zinc finger, C2H2 type;; Zinc-finger double domain	Lysine-specific demethylase SE14 GN=SE14 OS=Oryza sativa subsp. japonica (Rice) PE=3 SV=2	R	General function prediction only	PREDICTED: hypermethylated in cancer 2 protein-like isoform X2 [Setaria italica]	molecular function: binding (GO:0005488);; cellular component: cell (GO:0005623);; cellular component: cell part (GO:0044464);; biological process: metabolic process (GO:0008152);; biological process: cellular process (GO:0009987);; biological process: single-organism process (GO:0044699);; biological process: biological regulation (GO:0065007);; biological process: response to stimulus (GO:00508…	--
BMK_Unigene_010230	C2H2	TF	0.590037	0	0	0.589101	0.888279	1.39493	0.116929	-3.64089	normal	0.161182	-3.43932	normal	0.853201	0.592222	normal	0.555893	1.30169	normal	--	--	--	--	--	--	C2H2-type zinc finger;; Zinc finger, C2H2 type;; TRAF-type zinc finger	--	--	--	hypothetical protein SNOG_15315 [Phaeosphaeria nodorum SN15]	--	--
BMK_Unigene_010347	C2H2	TF	33.7893	27.5563	25.8705	32.2198	36.8071	27.6696	0.893484	0.0846679	normal	0.847098	0.127185	normal	0.608005	0.470655	normal	0.759837	0.161801	normal	--	--	Molecular Function: nucleic acid binding (GO:0003676);; Cellular Component: nucleus (GO:0005634);; Biological Process: regulation of transcription, DNA-templated (GO:0006355);; Biological Process: response to aluminum ion (GO:0010044);; Biological Process: response to acidic pH (GO:0010447);; Molecular Function: metal ion binding (GO:0046872);;	--	[R]	General function prediction only	--	Zinc finger protein STOP1 homolog OS=Oryza sativa subsp. japonica (Rice) PE=2 SV=1	K	Transcription	PREDICTED: zinc finger protein STOP1 homolog [Setaria italica]	molecular function: binding (GO:0005488);; cellular component: cell (GO:0005623);; cellular component: organelle (GO:0043226);; cellular component: cell part (GO:0044464);; biological process: biological regulation (GO:0065007);; biological process: response to stimulus (GO:0050896)	--
BMK_Unigene_011328	C2H2	TF	8.95202	4.19832	4.38478	8.60384	4.7649	5.44052	0.247693	-0.803418	normal	0.38178	-0.680057	normal	0.455067	-0.760492	normal	0.635343	-0.449953	normal	[R]	General function prediction only	Molecular Function: sequence-specific DNA binding transcription factor activity (GO:0003700);; Cellular Component: nucleolus (GO:0005730);; Biological Process: regulation of transcription, DNA-templated (GO:0006355);; Molecular Function: 5S rRNA binding (GO:0008097);; Molecular Function: metal ion binding (GO:0046872);; Molecular Function: 5S rDNA binding (GO:0080084);;	K09191|1.59771e-180|sita:101776384|transcription factor IIIA-like; K09191 general transcription factor IIIA (A)	[R]	General function prediction only	C2H2-type zinc finger;; Zinc finger, C2H2 type	Uncharacterized zinc finger protein At4g06634 GN=At4g06634 OS=Arabidopsis thaliana (Mouse-ear cress) PE=1 SV=1	K	Transcription	PREDICTED: transcription factor IIIA-like isoform X2 [Setaria italica]	biological process: biological regulation (GO:0065007);; molecular function: nucleic acid binding transcription factor activity (GO:0001071);; cellular component: cell (GO:0005623);; cellular component: membrane-enclosed lumen (GO:0031974);; cellular component: organelle (GO:0043226);; cellular component: organelle part (GO:0044422);; cellular component: cell part (GO:0044464);; molecular functio…	--
BMK_Unigene_011814	C2H2	TF	0.374557	0.59861	0.402062	0.173251	0	1.74079	0.613943	0.947624	normal	0.807445	0.554983	normal	0.751897	-1.33813	normal	0.699326	1.10288	normal	--	--	Molecular Function: DNA binding (GO:0003677);; Cellular Component: nucleus (GO:0005634);; Biological Process: transcription, DNA-templated (GO:0006351);; Molecular Function: zinc ion binding (GO:0008270);;	--	--	--	Zinc-finger double domain;; C2H2-type zinc finger	--	R	General function prediction only	RfeC [Verticillium dahliae VdLs.17]	molecular function: binding (GO:0005488);; cellular component: cell (GO:0005623);; cellular component: organelle (GO:0043226);; cellular component: cell part (GO:0044464);; biological process: metabolic process (GO:0008152);; biological process: cellular process (GO:0009987)	--
BMK_Unigene_012089	C2H2	TF	7.36764	21.1917	64.2257	5.1826	17.6645	48.5588	0.0155026	1.83669	normal	1.03207e-05	3.52193	up	0.000959044	1.97035	up	9.70389e-25	3.53723	up	--	--	--	--	[R]	General function prediction only	C2H2-type zinc finger;; C2H2-type zinc finger;; Zinc finger, C2H2 type	Zinc finger protein 1 OS=Triticum aestivum (Wheat) PE=2 SV=1	R	General function prediction only	PREDICTED: zinc finger protein 1-like [Setaria italica]	--	--
BMK_Unigene_012741	C2H2	TF	0.690098	3.92212	0.374395	0	0.620339	0.0235814	0.011866	2.70285	normal	0.85863	-0.321235	normal	0.0424326	3.64967	normal	0.699326	0.884471	normal	--	--	--	--	--	--	C2H2-type zinc finger	--	--	--	Zinc finger, C2H2-type/integrase, DNA-binding protein, partial [Metarhizium brunneum ARSEF 3297]	--	--
BMK_Unigene_012782	C2H2	TF	1.50186	5.64388	5.53228	5.23451	8.23998	7.0679	0.00056867	2.22379	up	0.000855011	2.33133	up	0.582566	0.857084	normal	0.423456	0.755411	normal	--	--	--	--	--	--	Zinc-finger of C2H2 type;; Zinc-finger double-stranded RNA-binding;; C2H2-type zinc finger	UBP1-associated proteins 1C GN=UBA1C OS=Arabidopsis thaliana (Mouse-ear cress) PE=3 SV=2	R	General function prediction only	hypothetical protein SORBIDRAFT_02g024930 [Sorghum bicolor]	--	--
BMK_Unigene_012964	C2H2	TF	18.8571	14.8237	11.2913	20.3009	16.2651	21.5266	0.972254	0.024555	normal	0.760273	-0.227242	normal	0.985584	-0.0322526	normal	0.44001	0.461776	normal	[QR]	--	Molecular Function: methyltransferase activity (GO:0008168);; Cellular Component: plastoglobule (GO:0010287);; Biological Process: methylation (GO:0032259);; Biological Process: response to karrikin (GO:0080167);;	--	--	--	Methyltransferase domain;; Methyltransferase domain;; Methyltransferase domain;; Methyltransferase domain;; ubiE/COQ5 methyltransferase family;; Methyltransferase domain;; Methyltransferase domain	Uncharacterized methyltransferase At2g41040, chloroplastic (Precursor) GN=At2g41040 OS=Arabidopsis thaliana (Mouse-ear cress) PE=2 SV=1	R	General function prediction only	hypothetical protein SORBIDRAFT_10g025400 [Sorghum bicolor]	biological process: metabolic process (GO:0008152);; molecular function: catalytic activity (GO:0003824);; cellular component: cell (GO:0005623);; cellular component: organelle (GO:0043226);; cellular component: organelle part (GO:0044422);; cellular component: cell part (GO:0044464);; biological process: response to stimulus (GO:0050896)	--
BMK_Unigene_013088	C2H2	TF	1.19519	0	0	0.576103	0.683309	2.76733	0.185988	-3.36113	normal	0.00821314	-5.02973	down	0.9311	0.345058	normal	0.0424786	2.28547	normal	--	--	--	--	--	--	C2H2-type zinc finger;; Zinc finger, C2H2 type	--	--	--	putative zinc finger c2h2-like protein [Neofusicoccum parvum UCRNP2]	--	--
BMK_Unigene_013183	C2H2	TF	1.12336	1.43542	0.928789	1.07298	1.99573	0.86631	0.60326	0.689679	normal	0.87435	0.224793	normal	0.751897	1.01718	normal	0.973021	0.0887361	normal	--	--	Cellular Component: mitochondrion (GO:0005739);;	--	[R]	General function prediction only	C2H2-type zinc finger;; Zinc-finger double-stranded RNA-binding;; Zinc-finger of C2H2 type;; Zinc finger, C2H2 type;; C2H2-type zinc finger	Zinc finger protein ZAT1 GN=ZAT1 OS=Arabidopsis thaliana (Mouse-ear cress) PE=2 SV=1	R	General function prediction only	PREDICTED: zinc finger protein ZAT1-like [Setaria italica]	cellular component: cell (GO:0005623);; cellular component: organelle (GO:0043226);; cellular component: cell part (GO:0044464)	--
BMK_Unigene_013352	C2H2	TF	38.2937	27.2197	21.7757	78.0019	42.9923	39.3514	0.849358	-0.115858	normal	0.650012	-0.296014	normal	0.424771	-0.574587	normal	0.132056	-0.597323	normal	--	--	Molecular Function: nucleic acid binding (GO:0003676);; Molecular Function: metal ion binding (GO:0046872);;	--	[R]	General function prediction only	Zinc finger, C2H2 type;; C2H2-type zinc finger	Zinc finger protein STOP1 homolog OS=Oryza sativa subsp. japonica (Rice) PE=2 SV=1	R	General function prediction only	PREDICTED: zinc finger protein STAR3-like [Setaria italica]	molecular function: binding (GO:0005488)	--
BMK_Unigene_013456	C2H2	TF	2.62724	0.394106	0.335589	2.63423	1.05729	0.834734	0.000123869	-2.21705	down	0.00018201	-2.34295	down	0.39317	-0.994373	normal	0.0960348	-1.13673	normal	--	--	Molecular Function: nucleic acid binding (GO:0003676);; Molecular Function: metal ion binding (GO:0046872);;	--	[R]	General function prediction only	Zinc finger, C2H2 type;; JmjC domain, hydroxylase	Lysine-specific demethylase JMJ705 OS=Oryza sativa subsp. japonica (Rice) PE=1 SV=1	R	General function prediction only	PREDICTED: lysine-specific demethylase REF6-like [Zea mays]	molecular function: binding (GO:0005488)	--
BMK_Unigene_013460	C2H2	TF	1.28244	18.0125	6.65699	0	2.41832	0.0839121	2.18101e-07	4.03892	up	0.0110396	2.73931	normal	0.631561	1.70764	normal	0.654934	1.29598	normal	[R]	General function prediction only	Molecular Function: binding (GO:0005488);;	--	[R]	General function prediction only	Zinc finger, C2H2 type;; Zinc-finger double domain	--	K	Transcription	putative ph-response transcription factor pacc rim101 protein [Togninia minima UCRPA7]	molecular function: binding (GO:0005488)	--
BMK_Unigene_013567	C2H2	TF	1.38784	2.64806	0.867593	0	0.342714	0.00648024	0.258174	1.25183	normal	0.968034	-0.0717754	normal	0.0438787	3.63506	normal	--	--	--	--	--	Molecular Function: DNA binding (GO:0003677);; Cellular Component: nucleus (GO:0005634);; Biological Process: transcription, DNA-templated (GO:0006351);; Molecular Function: zinc ion binding (GO:0008270);;	--	[R]	General function prediction only	Fungal specific transcription factor domain;; Zinc-finger double domain	--	--	--	c2h2 finger domain containing protein [Grosmannia clavigera kw1407]	molecular function: binding (GO:0005488);; cellular component: cell (GO:0005623);; cellular component: organelle (GO:0043226);; cellular component: cell part (GO:0044464);; biological process: metabolic process (GO:0008152);; biological process: cellular process (GO:0009987)	--
BMK_Unigene_014215	C2H2	TF	0.708436	2.81646	1.46988	0.0573534	0.285458	0.0186544	0.00761429	2.28182	up	0.221461	1.52112	normal	0.738407	1.48243	normal	0.884928	-0.426425	normal	--	--	Molecular Function: nucleic acid binding (GO:0003676);; Molecular Function: metal ion binding (GO:0046872);;	--	--	--	--	--	K	Transcription	Putative protein of unknown function [Podospora anserina S mat+]	molecular function: binding (GO:0005488)	--
BMK_Unigene_014496	C2H2	TF	0.366281	7.84825	0.154092	0.0520401	0.0682083	0.116701	4.66745e-07	4.4858	up	0.825411	-0.58661	normal	0.956074	0.256865	normal	0.75368	0.791585	normal	--	--	--	--	[R]	General function prediction only	Zinc finger, C2H2 type;; C2H2-type zinc finger;; Zinc-finger double domain	--	R	General function prediction only	hypothetical protein RSOLAG1IB_00767 [Rhizoctonia solani AG-1 IB]	--	--
BMK_Unigene_014766	C2H2	TF	0.879615	0.872891	1.28677	0	0.0479555	8.26805	0.845047	0.346963	normal	0.650012	0.984454	normal	0.54047	1.9642	normal	0.0642019	3.32093	normal	[R]	General function prediction only	--	--	[R]	General function prediction only	Zinc finger, C2H2 type;; C2H2-type zinc finger;; Zinc-finger of C2H2 type;; Zinc-finger double-stranded RNA-binding	--	--	--	cutinase G-box binding protein [Verticillium dahliae VdLs.17]	--	--
BMK_Unigene_014805	C2H2	TF	0	0.0146146	3.84286	0	0.13789	0	--	--	--	0.43518	2.44055	normal	0.751897	1.31043	normal	--	--	--	--	--	--	--	[R]	General function prediction only	--	--	R	General function prediction only	hypothetical protein CH063_09450 [Colletotrichum higginsianum]	--	--
BMK_Unigene_015185	C2H2	TF	0.383178	5.26839	0.348216	0.102751	0.0339264	0.249093	4.08067e-05	3.87338	up	0.942328	0.254858	normal	0.878466	-0.534268	normal	0.699326	1.10424	normal	[KD]	--	--	--	[KD]	--	--	--	--	--	hypothetical protein RSOL_495650 [Rhizoctonia solani AG-3 Rhs1AP]	--	--
BMK_Unigene_015753	C2H2	TF	0	0.161038	4.31379	0	0	1.51463	0.0618924	4.08768	normal	0.530676	2.1111	normal	--	--	--	0.434332	1.88535	normal	[R]	General function prediction only	Molecular Function: binding (GO:0005488);;	--	[R]	General function prediction only	Zinc finger, C2H2 type;; C2H2-type zinc finger;; Zinc-finger double domain;; Zinc-finger double-stranded RNA-binding;; Zinc-finger of C2H2 type	--	--	--	cutinase G-box binding protein [Nectria haematococca mpVI]	molecular function: binding (GO:0005488)	--
BMK_Unigene_016048	C2H2	TF	20.941	20.9748	28.0932	19.408	18.1854	23.9144	0.524803	0.380374	normal	0.0239087	0.97123	normal	0.751897	0.284581	normal	0.0368506	0.748191	normal	[O]	Posttranslational modification, protein turnover, chaperones	Cellular Component: intracellular (GO:0005622);; Biological Process: ubiquitin-dependent protein catabolic process (GO:0006511);; Molecular Function: zinc ion binding (GO:0008270);;	--	[O]	Posttranslational modification, protein turnover, chaperones	Ubiquitin fusion degradation protein UFD1	--	O	Posttranslational modification, protein turnover, chaperones	PREDICTED: uncharacterized protein LOC101755703 [Setaria italica]	cellular component: cell (GO:0005623);; cellular component: cell part (GO:0044464);; biological process: metabolic process (GO:0008152);; biological process: cellular process (GO:0009987);; molecular function: binding (GO:0005488)	--
BMK_Unigene_017074	C2H2	TF	1.82727	9.2961	17.7533	1.17716	11.9255	15.5317	0.00877697	2.55484	up	7.22101e-05	3.59095	up	6.03455e-05	3.30008	up	3.77128e-08	3.81307	up	--	--	--	--	[R]	General function prediction only	C2H2-type zinc finger	Zinc finger protein ZAT8 GN=ZAT8 OS=Arabidopsis thaliana (Mouse-ear cress) PE=2 SV=1	--	--	PREDICTED: zinc finger protein ZAT11-like [Setaria italica]	--	--
BMK_Unigene_017236	C2H2	TF	5.5968	29.1238	79.1088	6.34462	14.3296	41.6858	0.00231762	2.62597	up	2.31057e-06	4.14005	up	0.240088	1.34202	normal	3.54159e-09	2.96459	up	--	--	Cellular Component: nucleus (GO:0005634);; Cellular Component: plastid (GO:0009536);;	--	[R]	General function prediction only	C2H2-type zinc finger	Zinc finger protein ZAT8 GN=ZAT8 OS=Arabidopsis thaliana (Mouse-ear cress) PE=2 SV=1	R	General function prediction only	hypothetical protein SORBIDRAFT_03g039270 [Sorghum bicolor]	cellular component: cell (GO:0005623);; cellular component: organelle (GO:0043226);; cellular component: cell part (GO:0044464)	--
BMK_Unigene_017507	C2H2	TF	0.982196	0	0	0.934179	0.420991	0.963363	0.000549452	-5.85672	down	0.00118026	-5.59423	down	0.803104	-0.652137	normal	0.848802	0.331303	normal	--	--	--	--	--	--	Zinc finger, C2H2 type	--	--	--	hypothetical protein COCCADRAFT_32726 [Bipolaris zeicola 26-R-13]	--	--
BMK_Unigene_017593	C2H2	TF	5.61961	4.56443	7.24578	4.19483	3.40313	3.4172	0.958016	0.0628652	normal	0.537483	0.799526	normal	0.995072	-0.00783185	normal	0.942311	0.0946558	normal	--	--	Molecular Function: metal ion binding (GO:0046872);;	--	--	--	--	Probable transcriptional regulator RABBIT EARS GN=RBE OS=Arabidopsis thaliana (Mouse-ear cress) PE=2 SV=2	R	General function prediction only	PREDICTED: zinc finger protein 1-like [Setaria italica]	molecular function: binding (GO:0005488)	--
BMK_Unigene_018416	C2H2	TF	7.42904	3.37801	3.05207	7.01037	4.6558	4.52817	0.252563	-0.750605	normal	0.36847	-0.775636	normal	0.751897	-0.304628	normal	0.699326	-0.250039	normal	[R]	General function prediction only	Molecular Function: nucleic acid binding (GO:0003676);; Molecular Function: metal ion binding (GO:0046872);;	--	[R]	General function prediction only	Zinc finger, C2H2 type;; C2H2-type zinc finger;; Zinc-finger double domain;; Zinc-finger double-stranded RNA-binding	Uncharacterized zinc finger protein At4g06634 GN=At4g06634 OS=Arabidopsis thaliana (Mouse-ear cress) PE=1 SV=1	R	General function prediction only	PREDICTED: uncharacterized zinc finger protein At4g06634-like [Setaria italica]	molecular function: binding (GO:0005488)	--
BMK_Unigene_018569	C2H2	TF	0.824969	1.21142	0.982968	0.00870543	0.246833	0	0.571018	0.870667	normal	0.666658	0.695819	normal	0.22311	2.70846	normal	--	--	--	--	--	Molecular Function: binding (GO:0005488);;	--	--	--	Fungal specific transcription factor domain;; Zinc-finger double domain;; C2H2-type zinc finger	--	K	Transcription	C2H2 transcription factor [Colletotrichum orbiculare MAFF 240422]	molecular function: binding (GO:0005488)	--
BMK_Unigene_018639	C2H2	TF	7.25704	0	0	0.128263	0.0645266	0.531397	0.253899	-3.05018	normal	0.328869	-2.81796	normal	0.926881	-0.38339	normal	0.383473	1.79486	normal	--	--	--	--	--	--	--	--	R	General function prediction only	hypothetical protein PTT_06247 [Pyrenophora teres f. teres 0-1]	--	--
BMK_Unigene_018754	C2H2	TF	10.0542	7.12025	7.40319	10.6757	9.86397	10.7442	0.847012	-0.115407	normal	0.919925	0.0863181	normal	0.867852	0.149854	normal	0.49912	0.375375	normal	[R]	General function prediction only	Cellular Component: nucleus (GO:0005634);; Cellular Component: chromosome (GO:0005694);; Molecular Function: zinc ion binding (GO:0008270);; Molecular Function: histone-lysine N-methyltransferase activity (GO:0018024);; Biological Process: histone lysine methylation (GO:0034968);;	--	[R]	General function prediction only	SET domain;; Pre-SET motif;; CCCH zinc finger in TRM13 protein	Histone-lysine N-methyltransferase SUVR5 GN=F27L4.9/F27L4.8/F27L4.7 OS=Arabidopsis thaliana (Mouse-ear cress) PE=1 SV=3	K	Transcription	PREDICTED: histone-lysine N-methyltransferase SUVR5-like isoform X1 [Setaria italica]	cellular component: cell (GO:0005623);; cellular component: organelle (GO:0043226);; cellular component: cell part (GO:0044464);; molecular function: binding (GO:0005488);; biological process: metabolic process (GO:0008152);; biological process: cellular process (GO:0009987);; biological process: single-organism process (GO:0044699);; biological process: cellular component organization or biogene…	--
BMK_Unigene_018814	C2H2	TF	0.246648	0	0	0.982884	1.28801	1.95953	0.231977	-3.08834	normal	0.290255	-2.92423	normal	0.868875	0.501591	normal	0.40348	1.20421	normal	--	--	--	--	[R]	General function prediction only	Zinc finger, C2H2 type;; C2H2-type zinc finger;; Zinc-finger double domain	--	K	Transcription	hypothetical protein FOMMEDRAFT_21907 [Fomitiporia mediterranea MF3/22]	--	--
BMK_Unigene_019082	C2H2	TF	20.2051	16.7823	18.8147	28.8271	22.2928	21.3738	0.812702	0.159094	normal	0.654294	0.409023	normal	0.838025	-0.224336	normal	0.972123	-0.0337363	normal	--	--	Molecular Function: nucleic acid binding (GO:0003676);; Molecular Function: metal ion binding (GO:0046872);;	--	[R]	General function prediction only	Zinc finger, C2H2 type;; Zinc-finger double-stranded RNA-binding	Protein indeterminate-domain 1 {ECO:0000303|PubMed:16784536} OS=Arabidopsis thaliana (Mouse-ear cress) PE=1 SV=1	R	General function prediction only	PREDICTED: zinc finger protein NUTCRACKER-like [Setaria italica]	molecular function: binding (GO:0005488)	--
BMK_Unigene_019318	C2H2	TF	22.6916	12.7708	13.6319	26.9483	17.9022	21.3005	0.400433	-0.44747	normal	0.715303	-0.212023	normal	0.751897	-0.311261	normal	0.967354	0.0334064	normal	--	--	Molecular Function: metal ion binding (GO:0046872);;	--	--	--	--	--	R	General function prediction only	PREDICTED: uncharacterized protein LOC101770765 [Setaria italica]	molecular function: binding (GO:0005488)	--
BMK_Unigene_020280	C2H2	TF	0.159348	6.20636	0.125551	0.0215308	0.0211552	0.0646267	5.36566e-08	5.22448	up	0.973922	0.103016	normal	0.987016	0.0707506	normal	0.831758	0.542925	normal	[R]	General function prediction only	--	--	[R]	General function prediction only	Zinc finger, C2H2 type;; Zinc-finger double domain;; C2H2-type zinc finger;; Zinc-finger double-stranded RNA-binding	Uncharacterized zinc finger protein At4g06634 GN=At4g06634 OS=Arabidopsis thaliana (Mouse-ear cress) PE=1 SV=1	R	General function prediction only	hypothetical protein BN14_01832 [Rhizoctonia solani AG-1 IB]	--	--
BMK_Unigene_020654	C2H2	TF	43.2988	31.8889	38.8116	43.8035	37.9284	45.3158	0.805803	-0.155854	normal	0.613155	0.398232	normal	0.874699	0.168598	normal	0.152233	0.665469	normal	[O]	Posttranslational modification, protein turnover, chaperones	Cellular Component: cytosol (GO:0005829);; Biological Process: protein glycosylation (GO:0006486);; Biological Process: protein targeting to vacuole (GO:0006623);; Molecular Function: zinc ion binding (GO:0008270);;	--	[O]	Posttranslational modification, protein turnover, chaperones	PUB domain;; UBA/TS-N domain;; Fatty acid desaturase	Acyl-[acyl-carrier-protein] desaturase 5, chloroplastic (Precursor) OS=Oryza sativa subsp. japonica (Rice) PE=2 SV=2	O	Posttranslational modification, protein turnover, chaperones	PREDICTED: calponin homology domain-containing protein DDB_G0272472-like [Setaria italica]	cellular component: cell (GO:0005623);; cellular component: cell part (GO:0044464);; biological process: metabolic process (GO:0008152);; biological process: cellular process (GO:0009987);; biological process: single-organism process (GO:0044699);; biological process: localization (GO:0051179);; molecular function: binding (GO:0005488)	--
BMK_Unigene_020945	C2H2	TF	0.748875	0	0	1.20646	1.01384	1.27163	0.00638726	-5.07988	down	0.0116356	-4.82606	normal	0.992807	0.0268345	normal	0.806029	0.379127	normal	--	--	Molecular Function: metal ion binding (GO:0046872);;	--	--	--	Zinc finger, C2H2 type	--	--	--	hypothetical protein SNOG_15249 [Phaeosphaeria nodorum SN15]	molecular function: binding (GO:0005488)	--
BMK_Unigene_021056	C2H2	TF	0.231723	0	0	0.0703739	0.0735441	0.0713569	0.60326	-1.43188	normal	0.650012	-1.31637	normal	0.98512	0.0997974	normal	0.972123	0.108504	normal	[R]	General function prediction only	Molecular Function: translation elongation factor activity (GO:0003746);; Biological Process: translational elongation (GO:0006414);;	--	[S]	Function unknown	Transcription elongation factor Elf1 like	--	S	Function unknown	hypothetical protein SNOG_09426 [Phaeosphaeria nodorum SN15]	biological process: metabolic process (GO:0008152);; biological process: cellular process (GO:0009987);; molecular function: binding (GO:0005488)	--
BMK_Unigene_021058	C2H2	TF	0	0	0.115581	0	0	0.213764	--	--	--	--	--	--	--	--	--	0.699326	0.883547	normal	[R]	General function prediction only	Molecular Function: nucleic acid binding (GO:0003676);; Molecular Function: metal ion binding (GO:0046872);;	--	[R]	General function prediction only	--	--	K	Transcription	C2H2 transcription factor (Egr2), putative [Cordyceps militaris CM01]	molecular function: binding (GO:0005488)	--
BMK_Unigene_021390	C2H2	TF	0.0925698	0	0	0	0	0	--	--	--	--	--	--	--	--	--	--	--	--	[R]	General function prediction only	Molecular Function: nucleic acid binding (GO:0003676);; Molecular Function: metal ion binding (GO:0046872);;	--	[R]	General function prediction only	Zinc-finger double domain;; Zinc finger, C2H2 type;; C2H2-type zinc finger	--	R	General function prediction only	hypothetical protein COCCADRAFT_100277 [Bipolaris zeicola 26-R-13]	molecular function: binding (GO:0005488)	--
BMK_Unigene_021861	C2H2	TF	0.267092	0	0.0671583	0	0	0.310518	0.60326	-1.66441	normal	0.839641	-0.695099	normal	--	--	--	0.699326	1.13923	normal	--	--	Molecular Function: nucleic acid binding (GO:0003676);; Molecular Function: metal ion binding (GO:0046872);;	--	[R]	General function prediction only	Zinc finger, C2H2 type	--	R	General function prediction only	hypothetical protein CFIO01_11321 [Colletotrichum fioriniae PJ7]	molecular function: binding (GO:0005488)	--
BMK_Unigene_030793	C2H2	TF	0	0.550086	2.58562	0.278677	0.413066	1.86188	0.0923597	3.84104	normal	6.08005e-05	6.33409	up	0.855047	0.55907	normal	0.0141486	2.71097	normal	--	--	Molecular Function: nucleic acid binding (GO:0003676);; Cellular Component: nucleus (GO:0005634);; Biological Process: pollen tube growth (GO:0009860);; Molecular Function: metal ion binding (GO:0046872);;	--	[R]	General function prediction only	--	Zinc finger protein WIP2 OS=Arabidopsis thaliana (Mouse-ear cress) PE=1 SV=1	R	General function prediction only	PREDICTED: protein TRANSPARENT TESTA 1-like [Setaria italica]	molecular function: binding (GO:0005488);; cellular component: cell (GO:0005623);; cellular component: organelle (GO:0043226);; cellular component: cell part (GO:0044464);; biological process: cellular process (GO:0009987);; biological process: reproductive process (GO:0022414);; biological process: multicellular organismal process (GO:0032501);; biological process: developmental process (GO:0032…	--
BMK_Unigene_033002	C2H2	TF	0.339688	0.614681	0.374915	0	0	2.13462	0.695471	0.942508	normal	0.875567	0.519322	normal	--	--	--	0.344827	2.14227	normal	--	--	Molecular Function: nucleic acid binding (GO:0003676);; Molecular Function: metal ion binding (GO:0046872);;	--	--	--	Zinc finger, C2H2 type	--	R	General function prediction only	hypothetical protein CGLO_01954 [Colletotrichum gloeosporioides Cg-14]	molecular function: binding (GO:0005488)	--
BMK_Unigene_033397	C2H2	TF	1.14149	1.7852	1.42609	0	0.024715	0	0.432302	0.995045	normal	0.63363	0.776449	normal	0.751897	0.861298	normal	--	--	--	--	--	Molecular Function: nucleic acid binding (GO:0003676);; Molecular Function: metal ion binding (GO:0046872);;	--	[R]	General function prediction only	--	--	R	General function prediction only	hypothetical protein THITE_2113340 [Thielavia terrestris NRRL 8126]	molecular function: binding (GO:0005488)	--
BMK_Unigene_034682	C2H2	TF	1.77526	1.22178	1.94391	0	0	0	0.947157	-0.146414	normal	0.802119	0.513079	normal	--	--	--	--	--	--	--	--	--	--	[R]	General function prediction only	Zinc finger, C2H2 type;; C2H2-type zinc finger;; Zinc-finger double domain;; Zinc-finger double-stranded RNA-binding	--	R	General function prediction only	hypothetical protein H072_9039 [Dactylellina haptotyla CBS 200.50]	--	--
BMK_Unigene_035351	C2H2	TF	0.200282	0.0558342	0.307531	0	0	1.27458	0.730731	-0.945363	normal	0.674205	0.928051	normal	--	--	--	0.00448822	4.29868	up	[R]	General function prediction only	--	--	[R]	General function prediction only	C2H2-type zinc finger;; Zinc finger, C2H2 type;; Zinc-finger double domain	--	S	Function unknown	C2H2 type zinc finger domain-containing protein [Verticillium dahliae VdLs.17]	--	--
BMK_Unigene_036495	C2H2	TF	0.725311	0.967617	0.664333	0.157495	0.341447	0.575013	0.60326	0.736116	normal	0.796842	0.389529	normal	0.751897	1.06183	normal	0.23539	1.86992	normal	--	--	--	--	--	--	C2H2-type zinc finger	--	--	--	--	--	--
BMK_Unigene_036705	C2H2	TF	0.455129	0.912218	1.75551	0	0	0	0.405094	1.29656	normal	0.0291366	2.29751	normal	--	--	--	--	--	--	[R]	General function prediction only	Molecular Function: nucleic acid binding (GO:0003676);; Molecular Function: metal ion binding (GO:0046872);;	--	[R]	General function prediction only	Zinc finger, C2H2 type;; Zinc-finger double domain;; C2H2-type zinc finger	Uncharacterized zinc finger protein At4g06634 GN=At4g06634 OS=Arabidopsis thaliana (Mouse-ear cress) PE=1 SV=1	R	General function prediction only	hypothetical protein THITE_2112134 [Thielavia terrestris NRRL 8126]	molecular function: binding (GO:0005488)	--
BMK_Unigene_038823	C2H2	TF	0.105873	0.197538	2.84305	0	0	0.0978349	--	--	--	0.532236	2.09622	normal	--	--	--	--	--	--	[R]	General function prediction only	Molecular Function: nucleic acid binding (GO:0003676);; Molecular Function: metal ion binding (GO:0046872);;	--	[R]	General function prediction only	Zinc finger, C2H2 type;; C2H2-type zinc finger;; Zinc-finger double domain;; Zinc-finger double-stranded RNA-binding;; Zinc-finger of C2H2 type	--	R	General function prediction only	zinc finger protein msn2 4 [Fusarium avenaceum]	molecular function: binding (GO:0005488)	--
BMK_Unigene_039949	C2H2	TF	1.67753	1.78846	1.33877	1.53009	1.20927	1.34767	0.8775	-0.437104	normal	0.89277	0.381361	normal	0.91742	-0.388288	normal	0.820147	0.565946	normal	--	--	Molecular Function: metal ion binding (GO:0046872);;	--	[R]	General function prediction only	C2H2-type zinc finger	Zinc finger protein ZAT5 GN=ZAT5 OS=Arabidopsis thaliana (Mouse-ear cress) PE=2 SV=1	R	General function prediction only	PREDICTED: zinc finger protein ZAT5-like [Setaria italica]	molecular function: binding (GO:0005488)	--
BMK_Unigene_041359	C2H2	TF	0	0	0.106798	0	0	0	--	--	--	--	--	--	--	--	--	--	--	--	--	--	Molecular Function: nucleic acid binding (GO:0003676);; Molecular Function: zinc ion binding (GO:0008270);;	--	[R]	General function prediction only	Zinc-finger of C2H2 type;; Zinc-finger double-stranded RNA-binding	--	R	General function prediction only	zinc finger protein Yan [Colletotrichum graminicola M1.001]	molecular function: binding (GO:0005488)	--
BMK_Unigene_042251	C2H2	TF	2.29662	1.46014	0.296244	0.0356811	0.210278	0	0.875909	-0.237621	normal	0.0592218	-2.20564	normal	0.590093	1.77393	normal	0.679409	-1.25031	normal	--	--	Molecular Function: nucleic acid binding (GO:0003676);; Molecular Function: sequence-specific DNA binding transcription factor activity (GO:0003700);; Cellular Component: nucleus (GO:0005634);; Biological Process: regulation of transcription, DNA-templated (GO:0006355);;	--	[R]	General function prediction only	--	--	R	General function prediction only	putative zinc finger protein [Togninia minima UCRPA7]	molecular function: binding (GO:0005488);; biological process: biological regulation (GO:0065007);; molecular function: nucleic acid binding transcription factor activity (GO:0001071);; cellular component: cell (GO:0005623);; cellular component: organelle (GO:0043226);; cellular component: cell part (GO:0044464)	--
BMK_Unigene_042849	C2H2	TF	4.2102	1.96839	3.14202	5.23715	2.49748	3.85877	0.484697	2.19031	normal	--	--	--	--	--	--	--	--	--	--	--	Molecular Function: binding (GO:0005488);; Cellular Component: nucleus (GO:0005634);;	--	[R]	General function prediction only	--	Zinc finger protein MAGPIE {ECO:0000303|PubMed:17785527} OS=Arabidopsis thaliana (Mouse-ear cress) PE=1 SV=1	R	General function prediction only	PREDICTED: zinc finger protein NUTCRACKER-like [Setaria italica]	molecular function: binding (GO:0005488);; cellular component: cell (GO:0005623);; cellular component: organelle (GO:0043226);; cellular component: cell part (GO:0044464)	--
BMK_Unigene_043726	C2H2	TF	0.360063	1.42048	2.42378	0.456832	1.16854	0.388942	0.773367	0.722562	normal	0.57949	1.44184	normal	0.89282	0.500203	normal	0.705166	-0.893921	normal	--	--	Molecular Function: nucleic acid binding (GO:0003676);; Molecular Function: metal ion binding (GO:0046872);;	--	[R]	General function prediction only	Zinc finger, C2H2 type;; Zinc-finger double-stranded RNA-binding	Protein SENSITIVE TO PROTON RHIZOTOXICITY 1 GN=STOP1 OS=Arabidopsis thaliana (Mouse-ear cress) PE=2 SV=1	R	General function prediction only	PREDICTED: protein SENSITIVE TO PROTON RHIZOTOXICITY 1-like, partial [Setaria italica]	molecular function: binding (GO:0005488)	--
BMK_Unigene_043728	C2H2	TF	0.160575	1.10592	1.12686	0.0368223	0.267018	0.184108	0.196386	3.25359	normal	0.0298963	4.42813	normal	0.751897	0.861298	normal	--	--	--	--	--	Molecular Function: nucleic acid binding (GO:0003676);; Molecular Function: metal ion binding (GO:0046872);;	--	[R]	General function prediction only	--	Zinc finger protein STOP1 homolog OS=Oryza sativa subsp. japonica (Rice) PE=2 SV=1	R	General function prediction only	PREDICTED: protein SENSITIVE TO PROTON RHIZOTOXICITY 1-like, partial [Setaria italica]	molecular function: binding (GO:0005488)	--
BMK_Unigene_043797	C2H2	TF	41.9195	29.8741	27.6176	58.3405	36.8701	35.3038	0.68391	-0.219616	normal	0.792077	-0.173383	normal	0.751897	-0.334393	normal	0.778502	-0.173536	normal	--	--	Molecular Function: DNA binding (GO:0003677);; Molecular Function: sequence-specific DNA binding transcription factor activity (GO:0003700);; Cellular Component: nucleus (GO:0005634);; Biological Process: regulation of transcription, DNA-templated (GO:0006355);; Molecular Function: zinc ion binding (GO:0008270);; Biological Process: negative regulation of flower development (GO:0009910);; Molecul…	--	[R]	General function prediction only	--	Protein SUPPRESSOR OF FRI 4 GN=SUF4 OS=Arabidopsis thaliana (Mouse-ear cress) PE=1 SV=1	R	General function prediction only	predicted protein [Hordeum vulgare subsp. vulgare]	molecular function: binding (GO:0005488);; biological process: biological regulation (GO:0065007);; molecular function: nucleic acid binding transcription factor activity (GO:0001071);; cellular component: cell (GO:0005623);; cellular component: organelle (GO:0043226);; cellular component: cell part (GO:0044464)	--
BMK_Unigene_044643	C2H2	TF	1.96045	2.57658	2.09928	0.897001	1.24775	0.666516	0.440602	1.00324	normal	0.693972	0.528465	normal	0.233516	2.23747	normal	0.718662	0.762086	normal	--	--	Molecular Function: nucleic acid binding (GO:0003676);; Cellular Component: nucleus (GO:0005634);; Molecular Function: zinc ion binding (GO:0008270);;	--	[D]	Cell cycle control, cell division, chromosome partitioning	Zinc-finger of C2H2 type;; Zinc-finger double-stranded RNA-binding;; A-kinase anchoring protein 95 (AKAP95);; C2H2 type zinc-finger (2 copies)	UBP1-associated proteins 1C GN=UBA1C OS=Arabidopsis thaliana (Mouse-ear cress) PE=3 SV=2	R	General function prediction only	PREDICTED: uncharacterized protein LOC101786502 isoform X2 [Setaria italica]	molecular function: binding (GO:0005488);; cellular component: cell (GO:0005623);; cellular component: organelle (GO:0043226);; cellular component: cell part (GO:0044464)	--
BMK_Unigene_045073	C2H2	TF	22.4897	61.2918	34.2163	41.4782	48.5173	39.2997	0.193105	1.47909	normal	0.615652	0.946253	normal	0.825334	0.441276	normal	0.90671	0.20689	normal	--	--	Molecular Function: metal ion binding (GO:0046872);;	--	[R]	General function prediction only	C2H2-type zinc finger;; Zinc finger, C2H2 type;; C2H2-type zinc finger;; Zinc finger, C2H2 type	Zinc finger protein WIP5 OS=Arabidopsis thaliana (Mouse-ear cress) PE=2 SV=1	R	General function prediction only	hypothetical protein SORBIDRAFT_03g040490 [Sorghum bicolor]	molecular function: binding (GO:0005488)	--
BMK_Unigene_046369	C2H2	TF	0.398146	0	0.222773	0	0	0.20967	0.557238	-1.92072	normal	0.96463	-0.178652	normal	--	--	--	0.654934	1.29986	normal	--	--	--	--	--	--	--	--	R	General function prediction only	hypothetical protein GLRG_10182 [Colletotrichum graminicola M1.001]	--	--
BMK_Unigene_048006	C2H2	TF	5.44479	2.73785	3.18786	5.85688	3.46069	3.72628	0.613943	-0.775013	normal	0.870111	-0.326587	normal	0.674309	-0.977885	normal	0.43692	-1.29315	normal	[R]	General function prediction only	Molecular Function: sequence-specific DNA binding transcription factor activity (GO:0003700);; Cellular Component: nucleolus (GO:0005730);; Biological Process: regulation of transcription, DNA-templated (GO:0006355);; Molecular Function: 5S rRNA binding (GO:0008097);; Molecular Function: metal ion binding (GO:0046872);; Molecular Function: 5S rDNA binding (GO:0080084);;	K09191|1.99591e-132|sita:101776384|transcription factor IIIA-like; K09191 general transcription factor IIIA (A)	[R]	General function prediction only	C2H2-type zinc finger;; Zinc finger, C2H2 type;; Zinc-finger double domain	Uncharacterized zinc finger protein At4g06634 GN=At4g06634 OS=Arabidopsis thaliana (Mouse-ear cress) PE=1 SV=1	K	Transcription	PREDICTED: transcription factor IIIA-like isoform X2 [Setaria italica]	biological process: biological regulation (GO:0065007);; molecular function: nucleic acid binding transcription factor activity (GO:0001071);; cellular component: cell (GO:0005623);; cellular component: membrane-enclosed lumen (GO:0031974);; cellular component: organelle (GO:0043226);; cellular component: organelle part (GO:0044422);; cellular component: cell part (GO:0044464);; molecular functio…	--
BMK_Unigene_048010	C2H2	TF	4.4628	5.29988	2.94148	2.986	3.29897	3.66454	0.52424	0.728557	normal	0.995231	-0.00953288	normal	0.985584	-0.0709675	normal	0.900632	0.216181	normal	--	--	Molecular Function: nucleic acid binding (GO:0003676);; Molecular Function: sequence-specific DNA binding transcription factor activity (GO:0003700);; Biological Process: regulation of transcription, DNA-templated (GO:0006355);; Molecular Function: zinc ion binding (GO:0008270);; Cellular Component: plastid (GO:0009536);;	--	--	--	NYN domain;; Zinc finger, C2H2 type	--	R	General function prediction only	hypothetical protein SORBIDRAFT_10g004570 [Sorghum bicolor]	molecular function: binding (GO:0005488);; biological process: biological regulation (GO:0065007);; molecular function: nucleic acid binding transcription factor activity (GO:0001071);; cellular component: cell (GO:0005623);; cellular component: organelle (GO:0043226);; cellular component: cell part (GO:0044464)	--
BMK_Unigene_048059	C2H2	TF	50.8116	54.2958	52.1819	38.3543	40.8465	35.1382	0.134342	0.885126	normal	0.124779	0.948094	normal	0.751897	0.614138	normal	0.908851	-0.163382	normal	--	--	Molecular Function: binding (GO:0005488);; Cellular Component: nucleus (GO:0005634);;	--	[R]	General function prediction only	Zinc finger, C2H2 type	Zinc finger protein STOP1 homolog OS=Oryza sativa subsp. japonica (Rice) PE=2 SV=1	K	Transcription	PREDICTED: zinc finger protein STAR3-like [Setaria italica]	molecular function: binding (GO:0005488);; cellular component: cell (GO:0005623);; cellular component: organelle (GO:0043226);; cellular component: cell part (GO:0044464)	--
BMK_Unigene_048180	C2H2	TF	5.80198	6.72164	5.8479	6.31631	6.57068	6.51	0.755455	-0.443944	normal	0.967555	-0.0731384	normal	0.887083	0.390812	normal	0.973845	0.0875083	normal	--	--	Molecular Function: zinc ion binding (GO:0008270);;	K15691|4.92809e-145|sita:101758114|E3 ubiquitin-protein ligase RFWD3-like; K15691 E3 ubiquitin-protein ligase RFWD3 [EC:6.3.2.19] (A)	[O]	Posttranslational modification, protein turnover, chaperones	Ring finger domain;; Zinc finger, C3HC4 type (RING finger);; Zinc finger, C3HC4 type (RING finger)	--	O	Posttranslational modification, protein turnover, chaperones	PREDICTED: E3 ubiquitin-protein ligase RFWD3-like [Setaria italica]	molecular function: binding (GO:0005488)	--
BMK_Unigene_048366	C2H2	TF	0.844541	0	0	0.482763	0.41686	0.687641	0.0282569	-4.49207	normal	0.0518219	-4.18903	normal	0.987016	0.0700315	normal	0.699326	0.769648	normal	--	--	Molecular Function: binding (GO:0005488);; Molecular Function: transferase activity, transferring phosphorus-containing groups (GO:0016772);;	--	[R]	General function prediction only	--	--	R	General function prediction only	hypothetical protein SNOG_15213 [Phaeosphaeria nodorum SN15]	molecular function: binding (GO:0005488);; biological process: metabolic process (GO:0008152);; molecular function: catalytic activity (GO:0003824)	--
BMK_Unigene_050550	C2H2	TF	6.91676	6.49259	6.08579	11.5814	8.55519	6.76528	0.930343	0.214182	normal	0.927978	-0.221612	normal	0.751897	0.615152	normal	0.930618	0.186353	normal	--	--	Molecular Function: DNA binding (GO:0003677);; Cellular Component: nucleus (GO:0005634);; Cellular Component: plastid (GO:0009536);; Molecular Function: metal ion binding (GO:0046872);;	--	--	--	Methyl-CpG binding domain	Methyl-CpG-binding domain-containing protein 8 GN=MBD8 OS=Arabidopsis thaliana (Mouse-ear cress) PE=2 SV=1	R	General function prediction only	hypothetical protein SORBIDRAFT_07g029020 [Sorghum bicolor]	molecular function: binding (GO:0005488);; cellular component: cell (GO:0005623);; cellular component: organelle (GO:0043226);; cellular component: cell part (GO:0044464)	--
BMK_Unigene_052587	C2H2	TF	5.09316	2.59532	2.64875	4.73288	3.8362	3.71892	0.73269	-0.351814	normal	0.909028	-0.161893	normal	0.845595	0.273911	normal	0.839961	-0.233092	normal	--	--	Molecular Function: nucleic acid binding (GO:0003676);; Biological Process: regulation of transcription, DNA-templated (GO:0006355);; Biological Process: cellular protein modification process (GO:0006464);; Biological Process: cellular component organization (GO:0016043);; Biological Process: single-organism metabolic process (GO:0044710);; Biological Process: single-organism cellular process (GO…	--	[R]	General function prediction only	JmjC domain, hydroxylase;; Zinc finger, C2H2 type;; Zinc-finger double domain	Lysine-specific demethylase SE14 GN=SE14 OS=Oryza sativa subsp. japonica (Rice) PE=3 SV=2	--	--	PREDICTED: probable lysine-specific demethylase ELF6-like [Setaria italica]	molecular function: binding (GO:0005488);; biological process: biological regulation (GO:0065007);; biological process: metabolic process (GO:0008152);; biological process: cellular process (GO:0009987);; biological process: cellular component organization or biogenesis (GO:0071840);; biological process: single-organism process (GO:0044699)	--
BMK_Unigene_053342	C2H2	TF	0.172877	2.74909	4.25647	0	0.0324874	0	0.000703931	3.96894	up	0.000595487	4.45513	up	--	--	--	--	--	--	[R]	General function prediction only	Molecular Function: DNA binding (GO:0003677);; Cellular Component: nucleus (GO:0005634);; Cellular Component: cytoplasm (GO:0005737);; Biological Process: regulation of transcription, DNA-templated (GO:0006355);; Molecular Function: metal ion binding (GO:0046872);;	--	[R]	General function prediction only	Zinc-finger double domain	--	K	Transcription	Putative pH-response transcription factor pacC/RIM101 [Podospora anserina S mat+]	molecular function: binding (GO:0005488);; cellular component: cell (GO:0005623);; cellular component: organelle (GO:0043226);; cellular component: cell part (GO:0044464);; biological process: biological regulation (GO:0065007)	--
BMK_Unigene_055884	C2H2	TF	0.147663	0.197354	0.249957	0	0	0.520236	0.890253	0.457967	normal	0.809121	0.777975	normal	--	--	--	0.242735	2.46834	normal	--	--	Molecular Function: DNA binding (GO:0003677);; Molecular Function: metal ion binding (GO:0046872);;	--	[O]	Posttranslational modification, protein turnover, chaperones	--	--	O	Posttranslational modification, protein turnover, chaperones	DNA-binding protein [Verticillium dahliae VdLs.17]	molecular function: binding (GO:0005488)	--
BMK_Unigene_057042	C2H2	TF	0	0.482675	0	0	0	0.112178	0.60326	1.70346	normal	--	--	--	--	--	--	--	--	--	--	--	--	--	[R]	General function prediction only	C2H2-type zinc finger	Transcriptional regulator TAC1 GN=TAC1 OS=Arabidopsis thaliana (Mouse-ear cress) PE=2 SV=1	R	General function prediction only	hypothetical protein SORBIDRAFT_06g019920 [Sorghum bicolor]	--	--
BMK_Unigene_058164	C2H2	TF	0	0.103033	0.310736	0	0	0	--	--	--	0.650012	1.56569	normal	--	--	--	--	--	--	--	--	--	--	--	--	--	--	S	Function unknown	hypothetical protein ACRE_037880 [Acremonium chrysogenum ATCC 11550]	--	--
BMK_Unigene_058659	C2H2	TF	0	0	0	0	0	0	--	--	--	--	--	--	--	--	--	--	--	--	[R]	General function prediction only	--	--	[R]	General function prediction only	Zinc-finger double domain;; Zinc finger, C2H2 type	Lysine-specific demethylase JMJ705 OS=Oryza sativa subsp. japonica (Rice) PE=1 SV=1	R	General function prediction only	Zinc finger, C2H2-type/integrase, DNA-binding protein, partial [Metarhizium anisopliae ARSEF 549]	--	--
BMK_Unigene_059249	C2H2	TF	0.258019	0	0	0.187205	0.0627553	0.123778	0.60326	-1.5391	normal	0.650012	-1.41805	normal	0.91318	-0.409011	normal	0.973845	-0.118409	normal	--	--	Molecular Function: metal ion binding (GO:0046872);;	--	--	--	Zinc finger, C2H2 type;; C2H2-type zinc finger	--	R	General function prediction only	conserved hypothetical protein [Pyrenophora tritici-repentis Pt-1C-BFP]	molecular function: binding (GO:0005488)	--
BMK_Unigene_059869	C2H2	TF	0.366471	0	0	0.118465	0.116933	0.058591	0.506552	-2.11356	normal	0.578269	-1.9367	normal	0.987796	0.0599863	normal	0.953963	-0.194163	normal	[R]	General function prediction only	Molecular Function: nucleic acid binding (GO:0003676);; Molecular Function: metal ion binding (GO:0046872);;	--	[R]	General function prediction only	Zinc finger, C2H2 type;; C2H2-type zinc finger	--	R	General function prediction only	hypothetical protein PTT_13146 [Pyrenophora teres f. teres 0-1]	molecular function: binding (GO:0005488)	--
BMK_Unigene_061873	C2H2	TF	0	0	0.130998	0	0	0	--	--	--	--	--	--	--	--	--	--	--	--	--	--	--	--	[R]	General function prediction only	--	--	K	Transcription	--	--	--
BMK_Unigene_065081	C2H2	TF	0	0	0.231163	0	0	0	--	--	--	0.650012	1.43022	normal	--	--	--	--	--	--	[O]	Posttranslational modification, protein turnover, chaperones	Molecular Function: protein binding (GO:0005515);; Biological Process: response to stress (GO:0006950);; Molecular Function: ion binding (GO:0043167);;	K09503|4.06495e-20|sot:102606249|dnaJ protein homolog ANJ1-like; K09503 DnaJ homolog subfamily A member 2 (A)	[O]	Posttranslational modification, protein turnover, chaperones	DnaJ central domain	DnaJ protein homolog 2 (Precursor) GN=LDJ2 OS=Allium porrum (Leek) PE=2 SV=1	O	Posttranslational modification, protein turnover, chaperones	hypothetical protein TREMEDRAFT_71500 [Tremella mesenterica DSM 1558]	molecular function: binding (GO:0005488);; biological process: response to stimulus (GO:0050896)	Protein processing in endoplasmic reticulum (ko04141)
BMK_Unigene_066068	C2H2	TF	0.296687	0	0	0.428189	0	0	0.60326	-1.66441	normal	0.650012	-1.52106	normal	0.751897	-1.26805	normal	0.628624	-1.40212	normal	[R]	General function prediction only	Molecular Function: nucleic acid binding (GO:0003676);; Molecular Function: metal ion binding (GO:0046872);;	--	[R]	General function prediction only	--	--	R	General function prediction only	hypothetical protein PTT_11782 [Pyrenophora teres f. teres 0-1]	molecular function: binding (GO:0005488)	--
BMK_Unigene_066176	C2H2	TF	0	0	0	0	0	0	--	--	--	--	--	--	--	--	--	--	--	--	--	--	--	--	--	--	--	--	R	General function prediction only	hypothetical protein VDAG_01526 [Verticillium dahliae VdLs.17]	--	--
BMK_Unigene_070685	C2H2	TF	0.0842601	0	0	0.445873	0.904822	2.42358	0.566053	-1.89631	normal	0.62878	-1.78567	normal	0.751897	0.917151	normal	0.00955074	2.50665	up	--	--	--	--	[R]	General function prediction only	Zinc-finger double-stranded RNA-binding;; Zinc-finger of C2H2 type;; Zinc finger, C2H2 type;; C2H2-type zinc finger;; C2H2-type zinc finger;; C2H2 type zinc-finger (2 copies);; zinc-finger of a C2HC-type	--	R	General function prediction only	hypothetical protein COCCADRAFT_112852 [Bipolaris zeicola 26-R-13]	--	--
BMK_Unigene_071166	C2H2	TF	0.529162	0	0	2.31774	1.23188	1.83753	0.174667	-3.36405	normal	0.251398	-3.08841	normal	0.891474	-0.439275	normal	0.973845	0.0710826	normal	[R]	General function prediction only	Molecular Function: DNA binding (GO:0003677);; Cellular Component: nucleus (GO:0005634);; Cellular Component: cytosol (GO:0005829);; Biological Process: cellular zinc ion homeostasis (GO:0006882);; Biological Process: pathogenesis (GO:0009405);; Biological Process: alkaloid biosynthetic process (GO:0009821);; Biological Process: unidimensional cell growth (GO:0009826);; Biological Process: spore …	--	[R]	General function prediction only	Zinc-finger double domain;; C2H2-type zinc finger;; Zinc finger, C2H2 type	Lysine-specific demethylase SE14 GN=SE14 OS=Oryza sativa subsp. japonica (Rice) PE=3 SV=2	R	General function prediction only	hypothetical protein SNOG_13619 [Phaeosphaeria nodorum SN15]	molecular function: binding (GO:0005488);; cellular component: cell (GO:0005623);; cellular component: organelle (GO:0043226);; cellular component: cell part (GO:0044464);; biological process: cellular process (GO:0009987);; biological process: single-organism process (GO:0044699);; biological process: biological regulation (GO:0065007);; biological process: multi-organism process (GO:0051704);; …	--
BMK_Unigene_071485	C2H2	TF	0	0.120457	0	0.369713	0.239424	0.232797	--	--	--	--	--	--	0.984797	-0.113896	normal	0.973845	-0.105418	normal	--	--	Molecular Function: binding (GO:0005488);;	--	[R]	General function prediction only	C2H2-type zinc finger;; Zinc-finger double-stranded RNA-binding;; Zinc finger, C2H2 type	Zinc finger protein AZF1 GN=K8K14.19 OS=Arabidopsis thaliana (Mouse-ear cress) PE=2 SV=1	K	Transcription	Zinc finger protein 1 [Aegilops tauschii]	molecular function: binding (GO:0005488)	--
BMK_Unigene_073141	C2H2	TF	1.15854	0	0	0.394753	0.316217	0.545464	0.006867	-5.10688	down	0.0152078	-4.7798	normal	0.99174	-0.0384185	normal	0.775261	0.610173	normal	--	--	--	--	[R]	General function prediction only	Zinc finger, C2H2 type;; C2H2-type zinc finger;; Zinc-finger double-stranded RNA-binding	--	R	General function prediction only	hypothetical protein COCCADRAFT_32726 [Bipolaris zeicola 26-R-13]	--	--
BMK_Unigene_074320	C2H2	TF	0	1.54465	1.39644	0	0.672212	0	0.00379686	5.33831	up	0.00100931	5.59972	up	0.570942	1.86901	normal	--	--	--	--	--	--	K14801|3.79299e-39|sbi:SORBI_01g037990|SORBIDRAFT_01g037990, Sb01g037990; hypothetical protein; K14801 pre-rRNA-processing protein TSR4 (A)	[R]	General function prediction only	--	--	R	General function prediction only	hypothetical protein SORBIDRAFT_01g037990 [Sorghum bicolor]	--	--
BMK_Unigene_075067	C2H2	TF	0.305448	1.11149	0.481084	0.229827	0	0.416603	0.414354	1.85152	normal	0.711215	0.955506	normal	0.751897	-0.941648	normal	0.781348	0.716403	normal	--	--	Cellular Component: proteasome complex (GO:0000502);; Biological Process: mycelium development (GO:0043581);; Molecular Function: metal ion binding (GO:0046872);;	--	--	--	C2H2-type zinc finger;; Zinc finger, C2H2 type	--	K	Transcription	hypothetical protein CGLO_17622 [Colletotrichum gloeosporioides Cg-14]	cellular component: cell (GO:0005623);; cellular component: macromolecular complex (GO:0032991);; cellular component: cell part (GO:0044464);; biological process: multicellular organismal process (GO:0032501);; biological process: developmental process (GO:0032502);; biological process: single-organism process (GO:0044699);; molecular function: binding (GO:0005488)	--
[truncated: 980 more rows]
