# Supplementary material for: De novo transcriptome in roots of switchgrass (Panicum virgatum L.) reveals gene expression dynamic and act network under alkaline salt stress
Source: BMC Genomics. 2021 Jan 28;22:82. doi: 10.1186/s12864-021-07368-w (PMC7841905; doi:10.1186/s12864-021-07368-w)
Supplement: Supplementary file 15 — Additional file 15: Table S13. Summary of differentially expressed TF genes in both AM-314/MS-155 (S) and Alamo (T) under alkaline salt stress. [file 12864_2021_7368_MOESM15_ESM.xlsx]

## Sheet: Sheet1
TF commonly differentially expressed in S-T only at 6 h
#ID	Family	FDR-S0/S6	Log2FC-S0/S6	S0/S6	FDR-S0/S24	Log2FC-S0/S24	S0/S24	FDR-T0/T24	Log2FC-T0/T24	T0/T6	FDR-T0/T24	Log2FC-T0/T24	T0/T24	COG_class	COG_class_annotation	GO_annotation	KEGG_annotation	KOG_class	KOG_class_annotation	Pfam_annotation	Swissprot_annotation	eggNOG_class	eggNOG_class_annotation	nr_annotation	GO_second_level_annotation	KEGG_pathway_annotation
BMK_Unigene_014746	bZIP	0.0094379	-2.44621	down	0.0144659	-3.13577	normal	0.00602086	-2.45864	down	0.429327	-0.71632	normal	--	--	Molecular Function: sequence-specific DNA binding transcription factor activity (GO:0003700);; Biological Process: regulation of transcription, DNA-templated (GO:0006355);; Molecular Function: sequence-specific DNA binding (GO:0043565);;	--	--	--	bZIP transcription factor;; Basic region leucine zipper	Light-inducible protein CPRF2 GN=CPRF2 OS=Petroselinum crispum (Parsley) PE=2 SV=2	--	--	PREDICTED: light-inducible protein CPRF2-like isoform X3 [Setaria italica]	biological process: biological regulation (GO:0065007);; molecular function: nucleic acid binding transcription factor activity (GO:0001071);; molecular function: binding (GO:0005488)	--
BMK_Unigene_084968	GARP-G2-like	1.34054e-11	-4.63671	down	0.263291	-1.33093	normal	0.000183544	-2.28876	down	0.0836164	-1.22533	normal	--	--	Molecular Function: binding (GO:0005488);; Cellular Component: mitochondrion (GO:0005739);;	--	--	--	MYB-CC type transfactor, LHEQLE motif;; Myb-like DNA-binding domain	Myb family transcription factor APL GN=APL OS=Arabidopsis thaliana (Mouse-ear cress) PE=2 SV=2	--	--	PREDICTED: myb family transcription factor APL-like isoform X1 [Setaria italica]	molecular function: binding (GO:0005488);; cellular component: cell (GO:0005623);; cellular component: organelle (GO:0043226);; cellular component: cell part (GO:0044464)	--
BMK_Unigene_007358	MADS-MIKC	5.22936e-09	-2.94147	down	0.0372327	-1.68706	normal	0.00438733	-2.00237	down	0.723547	0.422395	normal	--	--	Molecular Function: DNA binding (GO:0003677);; Molecular Function: sequence-specific DNA binding transcription factor activity (GO:0003700);; Cellular Component: nucleus (GO:0005634);; Biological Process: regulation of transcription, DNA-templated (GO:0006355);; Biological Process: iron ion transport (GO:0006826);; Biological Process: cellular response to iron ion starvation (GO:0010106);; Biolog…	--	[K]	Transcription	SRF-type transcription factor (DNA-binding and dimerisation domain);; K-box region	MADS-box transcription factor 26 GN=P0498H04.24 OS=Oryza sativa subsp. japonica (Rice) PE=2 SV=1	K	Transcription	PREDICTED: MADS-box transcription factor 26-like [Setaria italica]	molecular function: binding (GO:0005488);; biological process: biological regulation (GO:0065007);; molecular function: nucleic acid binding transcription factor activity (GO:0001071);; cellular component: cell (GO:0005623);; cellular component: organelle (GO:0043226);; cellular component: cell part (GO:0044464);; biological process: single-organism process (GO:0044699);; biological process: loca…	--
BMK_Unigene_002181	MYB-related	1.95702e-05	-1.98811	down	0.0998514	-1.1903	normal	0.00228478	-1.78379	down	0.0383068	-0.914711	normal	[KAD]	--	--	K09422|2.68971e-76|sita:101761709|transcription factor MYB59-like; K09422 myb proto-oncogene protein, plant (A)	[K]	Transcription	Myb-like DNA-binding domain;; Myb-like DNA-binding domain;; Myb-like DNA-binding domain	Myb-related protein MYBAS2 OS=Oryza sativa subsp. japonica (Rice) PE=2 SV=1	K	Transcription	PREDICTED: transcription factor MYB59-like [Setaria italica]	--	--
BMK_Unigene_007533	MYB-related	6.38302e-12	-3.41981	down	0.0635432	-1.53579	normal	4.13383e-05	-2.30908	down	0.239476	-0.850579	normal	[KAD]	--	Molecular Function: binding (GO:0005488);; Biological Process: transcription, DNA-templated (GO:0006351);;	K09422|1.34028e-144|sita:101786165|myb-related protein MYBAS2-like; K09422 myb proto-oncogene protein, plant (A)	[K]	Transcription	Myb-like DNA-binding domain;; Myb-like DNA-binding domain;; Myb-like DNA-binding domain	Myb-related protein MYBAS2 OS=Oryza sativa subsp. japonica (Rice) PE=2 SV=1	K	Transcription	PREDICTED: myb-related protein MYBAS2-like [Setaria italica]	molecular function: binding (GO:0005488);; biological process: metabolic process (GO:0008152);; biological process: cellular process (GO:0009987)	--
BMK_Unigene_031623	MYB-related	4.56773e-19	-4.81093	down	0.0295848	-2.19458	normal	0.00313241	-2.31269	down	0.038449	-1.57255	normal	[KAD]	--	Molecular Function: DNA binding (GO:0003677);; Molecular Function: chromatin binding (GO:0003682);;	K09422|2.41015e-82|sbi:SORBI_05g027360|SORBIDRAFT_05g027360, Sb05g027360; hypothetical protein; K09422 myb proto-oncogene protein, plant (A)	[K]	Transcription	Myb-like DNA-binding domain;; Myb-like DNA-binding domain	Myb-related protein MYBAS1 GN=MYBAS1 OS=Oryza sativa subsp. japonica (Rice) PE=2 SV=1	K	Transcription	hypothetical protein SORBIDRAFT_05g027360 [Sorghum bicolor]	molecular function: binding (GO:0005488)	--
BMK_Unigene_092617	MYB-related	1.04736e-11	-4.2697	down	0.202876	-1.3846	normal	0.000823434	-2.85583	down	0.286525	-0.894659	normal	[KAD]	--	--	K09422|7.14741e-102|sita:101786682|myb-related protein MYBAS1-like; K09422 myb proto-oncogene protein, plant (A)	[K]	Transcription	Myb-like DNA-binding domain;; Myb-like DNA-binding domain;; Myb-like DNA-binding domain	Myb-related protein MYBAS1 GN=MYBAS1 OS=Oryza sativa subsp. japonica (Rice) PE=2 SV=1	K	Transcription	--	--	--
TF commonly differentially expressed in S-T only at 24 h
#ID	Family	Type	FDR-S0/S6	Log2FC-S0/S6	S0/S6	FDR-S0/S24	Log2FC-S0/S24	S0/S24	FDR-T0/T24	Log2FC-T0/T24	T0/T6	FDR-T0/T24	Log2FC-T0/T24	T0/T24	COG_class	COG_class_annotation	GO_annotation	KEGG_annotation	KOG_class	KOG_class_annotation	Pfam_annotation	Swissprot_annotation	eggNOG_class	eggNOG_class_annotation	nr_annotation	GO_second_level_annotation	KEGG_pathway_annotation
BMK_Unigene_088487	C2H2	TF	0.957103	0.141631	normal	2.60404e-09	5.48178	up	0.964491	0.149323	normal	1.61489e-06	2.96301	up	--	--	Molecular Function: DNA binding (GO:0003677);; Cellular Component: nucleus (GO:0005634);; Cellular Component: plastid (GO:0009536);; Cellular Component: membrane (GO:0016020);; Molecular Function: metal ion binding (GO:0046872);;	--	--	--	Methyl-CpG binding domain;; Protein of unknown function (DUF679)	Methyl-CpG-binding domain-containing protein 8 GN=MBD8 OS=Arabidopsis thaliana (Mouse-ear cress) PE=2 SV=1	R	General function prediction only	hypothetical protein SORBIDRAFT_07g029020 [Sorghum bicolor]	molecular function: binding (GO:0005488);; cellular component: cell (GO:0005623);; cellular component: organelle (GO:0043226);; cellular component: cell part (GO:0044464);; cellular component: membrane (GO:0016020)	--
BMK_Unigene_015743	NAC	TF	0.0322649	1.62519	normal	0.00055341	2.50404	up	0.857983	0.400186	normal	8.49019e-07	3.45319	up	--	--	Cellular Component: plastid (GO:0009536);;	--	--	--	No apical meristem (NAM) protein	NAC domain-containing protein 19 GN=F14G24.16 OS=Arabidopsis thaliana (Mouse-ear cress) PE=1 SV=1	--	--	PREDICTED: NAC domain-containing protein 72-like [Setaria italica]	cellular component: cell (GO:0005623);; cellular component: organelle (GO:0043226);; cellular component: cell part (GO:0044464)	--
BMK_Unigene_036023	NAC	TF	0.308299	1.75122	normal	8.04292e-09	5.08222	up	0.509695	2.03232	normal	3.67886e-05	4.7811	up	--	--	Molecular Function: DNA binding (GO:0003677);; Biological Process: regulation of transcription, DNA-templated (GO:0006355);;	--	--	--	No apical meristem (NAM) protein	Protein CUP-SHAPED COTYLEDON 3 OS=Arabidopsis thaliana (Mouse-ear cress) PE=1 SV=1	S	Function unknown	PREDICTED: protein CUP-SHAPED COTYLEDON 2-like [Setaria italica]	molecular function: binding (GO:0005488);; biological process: biological regulation (GO:0065007)	--
BMK_Unigene_043535	NAC	TF	0.409736	0.903281	normal	0.00376886	2.13138	up	0.103428	1.87038	normal	0.000423981	2.53375	up	--	--	Molecular Function: DNA binding (GO:0003677);; Biological Process: regulation of transcription, DNA-templated (GO:0006355);; Biological Process: xylem development (GO:0010089);; Biological Process: regulation of programmed cell death (GO:0043067);; Biological Process: shoot system development (GO:0048367);;	--	--	--	No apical meristem (NAM) protein	NAC transcription factor NAM-B2 GN=NAM-B2 OS=Triticum turgidum subsp. durum (Durum wheat) PE=2 SV=1	S	Function unknown	hypothetical protein SORBIDRAFT_04g022672 [Sorghum bicolor]	molecular function: binding (GO:0005488);; biological process: biological regulation (GO:0065007);; biological process: developmental process (GO:0032502);; biological process: multicellular organismal process (GO:0032501);; biological process: single-organism process (GO:0044699)	--
BMK_Unigene_079034	NAC	TF	0.0516611	3.25012	normal	0.00798052	3.81158	up	0.218226	2.67627	normal	0.004753	3.85848	up	--	--	Molecular Function: DNA binding (GO:0003677);; Biological Process: regulation of transcription, DNA-templated (GO:0006355);;	--	--	--	No apical meristem (NAM) protein	NAC domain-containing protein 100 GN=NAC100 OS=Arabidopsis thaliana (Mouse-ear cress) PE=2 SV=1	S	Function unknown	PREDICTED: NAC domain-containing protein 100-like [Setaria italica]	molecular function: binding (GO:0005488);; biological process: biological regulation (GO:0065007)	--
BMK_Unigene_079828	NAC	TF	0.0202601	1.98245	normal	1.1594e-17	5.68019	up	0.063677	2.85174	normal	8.29453e-19	6.11511	up	--	--	Molecular Function: DNA binding (GO:0003677);; Biological Process: regulation of transcription, DNA-templated (GO:0006355);;	--	--	--	No apical meristem (NAM) protein	Protein CUP-SHAPED COTYLEDON 3 OS=Arabidopsis thaliana (Mouse-ear cress) PE=1 SV=1	S	Function unknown	PREDICTED: protein CUP-SHAPED COTYLEDON 2-like [Setaria italica]	molecular function: binding (GO:0005488);; biological process: biological regulation (GO:0065007)	--
BMK_Unigene_007550	Trihelix	TF	0.104668	0.737105	normal	0.00524869	1.19916	up	0.0965941	1.21298	normal	0.000140539	1.17628	up	--	--	Molecular Function: chromatin binding (GO:0003682);;	--	[K]	Transcription	Myb/SANT-like DNA-binding domain	Trihelix transcription factor GT-2 GN=GT-2 OS=Arabidopsis thaliana (Mouse-ear cress) PE=2 SV=1	K	Transcription	hypothetical protein [Zea mays]	molecular function: binding (GO:0005488)	--
BMK_Unigene_080490	Trihelix	TF	0.613943	0.526378	normal	0.000722628	2.72701	up	0.823604	-0.292735	normal	3.0714e-05	1.69745	up	--	--	Molecular Function: chromatin binding (GO:0003682);;	--	[K]	Transcription	Myb/SANT-like DNA-binding domain	Trihelix transcription factor GT-2 GN=GT-2 OS=Arabidopsis thaliana (Mouse-ear cress) PE=2 SV=1	K	Transcription	hypothetical protein SORBIDRAFT_06g023980 [Sorghum bicolor]	molecular function: binding (GO:0005488)	--
BMK_Unigene_005773	WRKY	TF	0.60326	-0.555876	normal	0.00453805	-2.55295	down	0.936011	0.132951	normal	2.02962e-06	-2.50633	down	--	--	--	--	--	--	WRKY DNA -binding domain	Probable WRKY transcription factor 41 GN=WRKY41 OS=Arabidopsis thaliana (Mouse-ear cress) PE=2 SV=2	--	--	PREDICTED: probable WRKY transcription factor 30-like [Setaria italica]	--	--
BMK_Unigene_081227	zf-HD	TF	0.281246	0.939724	normal	9.42582e-07	2.37577	up	0.190038	1.39823	normal	0.00166836	1.95688	up	--	--	Biological Process: photomorphogenesis (GO:0009640);; Biological Process: response to auxin (GO:0009733);; Biological Process: response to cytokinin (GO:0009735);; Biological Process: response to abscisic acid (GO:0009737);; Biological Process: response to gibberellin (GO:0009739);; Biological Process: response to brassinosteroid (GO:0009741);; Biological Process: negative regulation of DNA bindi…	--	--	--	ZF-HD protein dimerisation region	Mini zinc finger protein 1 GN=OsJ_32792 OS=Oryza sativa subsp. japonica (Rice) PE=3 SV=1	S	Function unknown	PREDICTED: ZF-HD homeobox protein At4g24660-like [Setaria italica]	biological process: multicellular organismal process (GO:0032501);; biological process: developmental process (GO:0032502);; biological process: single-organism process (GO:0044699);; biological process: response to stimulus (GO:0050896);; biological process: biological regulation (GO:0065007)	--
TF commonly differentially expressed in S-T both at 6 and 24 h
#ID	Family	Type	FDR-S0/S6	Log2FC-S0/S6	S0/S6	FDR-S0/S24	Log2FC-S0/S24	S0/S24	FDR-T0/T24	Log2FC-T0/T24	T0/T6	FDR-T0/T24	Log2FC-T0/T24	T0/T24	COG_class	COG_class_annotation	GO_annotation	KEGG_annotation	KOG_class	KOG_class_annotation	Pfam_annotation	Swissprot_annotation	eggNOG_class	eggNOG_class_annotation	nr_annotation	GO_second_level_annotation	KEGG_pathway_annotation
BMK_Unigene_007237	B3-ARF	TF	3.20936e-09	-2.55475	down	0.000318766	-1.97161	down	0.000215296	-1.78312	down	1.19351e-08	-2.06658	down	--	--	Molecular Function: DNA binding (GO:0003677);; Cellular Component: nucleus (GO:0005634);; Biological Process: regulation of transcription, DNA-templated (GO:0006355);; Biological Process: auxin-activated signaling pathway (GO:0009734);; Molecular Function: protein dimerization activity (GO:0046983);;	--	--	--	Auxin response factor;; AUX/IAA family;; B3 DNA binding domain	Auxin response factor 1 OS=Oryza sativa subsp. japonica (Rice) PE=2 SV=1	K	Transcription	PREDICTED: auxin response factor 1-like isoform X1 [Setaria italica]	molecular function: binding (GO:0005488);; cellular component: cell (GO:0005623);; cellular component: organelle (GO:0043226);; cellular component: cell part (GO:0044464);; biological process: biological regulation (GO:0065007);; biological process: cellular process (GO:0009987);; biological process: signaling (GO:0023052);; biological process: single-organism process (GO:0044699);; biological pr…	--
BMK_Unigene_011309	bHLH	TF	7.59237e-07	-2.48388	down	2.00064e-08	-2.98372	down	0.0028573	-1.75387	down	5.70361e-09	-2.38088	down	--	--	Cellular Component: nucleus (GO:0005634);; Biological Process: double fertilization forming a zygote and endosperm (GO:0009567);; Molecular Function: protein dimerization activity (GO:0046983);;	--	--	--	Helix-loop-helix DNA-binding domain;; Transposase-associated domain	Transcription factor UNE12 GN=T10P11.13 OS=Arabidopsis thaliana (Mouse-ear cress) PE=2 SV=2	K	Transcription	PREDICTED: transcription factor UNE12-like [Setaria italica]	cellular component: cell (GO:0005623);; cellular component: organelle (GO:0043226);; cellular component: cell part (GO:0044464);; biological process: reproduction (GO:0000003);; biological process: reproductive process (GO:0022414);; biological process: single-organism process (GO:0044699);; biological process: multi-organism process (GO:0051704);; molecular function: binding (GO:0005488)	--
BMK_Unigene_039895	bZIP	TF	9.28407e-10	-4.26309	down	3.99071e-08	-4.87661	down	9.9685e-05	-2.75604	down	5.50169e-16	-3.54106	down	--	--	Molecular Function: sequence-specific DNA binding transcription factor activity (GO:0003700);; Biological Process: regulation of transcription, DNA-templated (GO:0006355);; Molecular Function: sequence-specific DNA binding (GO:0043565);;	--	--	--	bZIP transcription factor;; Basic leucine-zipper C terminal;; Basic region leucine zipper	Light-inducible protein CPRF2 GN=CPRF2 OS=Petroselinum crispum (Parsley) PE=2 SV=2	S	Function unknown	PREDICTED: light-inducible protein CPRF2-like isoform X1 [Setaria italica]	biological process: biological regulation (GO:0065007);; molecular function: nucleic acid binding transcription factor activity (GO:0001071);; molecular function: binding (GO:0005488)	--
BMK_Unigene_006673	C2H2	TF	1.00586e-06	2.5394	up	7.225e-12	3.34438	up	5.17011e-05	3.6546	up	0.000131073	2.44195	up	--	--	Molecular Function: metal ion binding (GO:0046872);;	--	[R]	General function prediction only	C2H2-type zinc finger;; Zinc finger, C2H2 type	Zinc finger protein ZAT12 GN=MMN10.11 OS=Arabidopsis thaliana (Mouse-ear cress) PE=2 SV=1	--	--	PREDICTED: zinc finger protein ZAT12-like [Setaria italica]	molecular function: binding (GO:0005488)	--
BMK_Unigene_017074	C2H2	TF	0.00877697	2.55484	up	7.22101e-05	3.59095	up	6.03455e-05	3.30008	up	3.77128e-08	3.81307	up	--	--	--	--	[R]	General function prediction only	C2H2-type zinc finger	Zinc finger protein ZAT8 GN=ZAT8 OS=Arabidopsis thaliana (Mouse-ear cress) PE=2 SV=1	--	--	PREDICTED: zinc finger protein ZAT11-like [Setaria italica]	--	--
BMK_Unigene_043516	C3H	TF	1.01424e-09	3.50982	up	1.86177e-13	4.43585	up	1.3135e-06	2.74452	up	3.80184e-11	2.66253	up	[G]	Carbohydrate transport and metabolism	Cellular Component: cytoplasm (GO:0005737);; Biological Process: carbohydrate metabolic process (GO:0005975);; Molecular Function: fructose 1,6-bisphosphate 1-phosphatase activity (GO:0042132);; Molecular Function: metal ion binding (GO:0046872);;	K03841|1.64914e-152|sita:101756186|fructose-1,6-bisphosphatase, cytosolic-like; K03841 fructose-1,6-bisphosphatase I [EC:3.1.3.11] (A)	[G]	Carbohydrate transport and metabolism	Fructose-1-6-bisphosphatase;; Fructose-1-6-bisphosphatase	Fructose-1,6-bisphosphatase, cytosolic GN=CFBP OS=Saccharum hybrid (Sugarcane) PE=2 SV=2	G	Carbohydrate transport and metabolism	PREDICTED: fructose-1,6-bisphosphatase, cytosolic-like [Setaria italica]	cellular component: cell (GO:0005623);; cellular component: cell part (GO:0044464);; biological process: metabolic process (GO:0008152);; biological process: cellular process (GO:0009987);; molecular function: catalytic activity (GO:0003824);; molecular function: binding (GO:0005488)	Glycolysis / Gluconeogenesis (ko00010);; Pentose phosphate pathway (ko00030);; Fructose and mannose metabolism (ko00051);; Carbon fixation in photosynthetic organisms (ko00710);; Carbon metabolism (ko01200)
BMK_Unigene_020829	GARP-G2-like	TF	0.00320318	1.66665	up	0.00306477	1.79029	up	0.0065221	2.1455	up	0.000320553	2.19571	up	--	--	Molecular Function: DNA binding (GO:0003677);; Molecular Function: chromatin binding (GO:0003682);;	--	--	--	Myb-like DNA-binding domain	Two-component response regulator ARR1 GN=ARR1 OS=Arabidopsis thaliana (Mouse-ear cress) PE=1 SV=2	--	--	PREDICTED: probable transcription factor GLK1-like isoform X2 [Setaria italica]	molecular function: binding (GO:0005488)	--
BMK_Unigene_086914	GARP-G2-like	TF	3.47089e-11	2.60802	up	1.87163e-07	2.49783	up	0.00155545	1.82098	up	2.50778e-12	2.69274	up	--	--	Molecular Function: binding (GO:0005488);;	--	--	--	Myb-like DNA-binding domain	Two-component response regulator ARR1 GN=ARR1 OS=Arabidopsis thaliana (Mouse-ear cress) PE=1 SV=2	--	--	PREDICTED: probable transcription factor GLK1-like isoform X1 [Setaria italica]	molecular function: binding (GO:0005488)	--
BMK_Unigene_002392	HB-HD-ZIP	TF	8.47932e-05	2.56849	up	0.00765879	2.92123	up	0.000320736	3.05491	up	3.1182e-16	4.76231	up	--	--	Biological Process: transcription, DNA-templated (GO:0006351);; Molecular Function: sequence-specific DNA binding (GO:0043565);;	--	[K]	Transcription	Homeobox associated leucine zipper;; Homeobox domain	Homeobox-leucine zipper protein HOX24 GN=HOX24 OS=Oryza sativa subsp. indica (Rice) PE=2 SV=2	K	Transcription	PREDICTED: homeobox-leucine zipper protein HOX24-like [Setaria italica]	biological process: metabolic process (GO:0008152);; biological process: cellular process (GO:0009987);; molecular function: binding (GO:0005488)	--
BMK_Unigene_007570	MYB-related	TF	0.000186781	1.89981	up	0.00103596	1.71126	up	5.74123e-07	3.41019	up	6.80622e-17	3.13739	up	--	--	Molecular Function: DNA binding (GO:0003677);; Molecular Function: chromatin binding (GO:0003682);; Molecular Function: sequence-specific DNA binding transcription factor activity (GO:0003700);; Biological Process: regulation of transcription, DNA-templated (GO:0006355);; Molecular Function: zinc ion binding (GO:0008270);;	--	--	--	Myb-like DNA-binding domain	Transcription factor DIVARICATA GN=DIVARICATA OS=Antirrhinum majus (Garden snapdragon) PE=2 SV=1	--	--	hypothetical protein SORBIDRAFT_03g003270 [Sorghum bicolor]	molecular function: binding (GO:0005488);; biological process: biological regulation (GO:0065007);; molecular function: nucleic acid binding transcription factor activity (GO:0001071)	--
BMK_Unigene_043032	NAC	TF	0.00377498	1.32412	up	0.00374514	1.40878	up	0.00908394	1.80598	up	1.27403e-06	2.23361	up	--	--	Cellular Component: membrane (GO:0016020);;	--	--	--	No apical meristem (NAM) protein	NAC domain-containing protein 100 GN=NAC100 OS=Arabidopsis thaliana (Mouse-ear cress) PE=2 SV=1	S	Function unknown	PREDICTED: NAC domain-containing protein 100-like isoform X2 [Setaria italica]	cellular component: membrane (GO:0016020)	--
BMK_Unigene_045512	NAC	TF	1.64014e-29	4.5147	up	2.62766e-31	4.574	up	1.07812e-05	2.89503	up	1.45138e-07	2.91612	up	--	--	Molecular Function: DNA binding (GO:0003677);; Biological Process: regulation of transcription, DNA-templated (GO:0006355);;	--	--	--	No apical meristem (NAM) protein	NAC domain-containing protein 67 OS=Oryza sativa subsp. japonica (Rice) PE=2 SV=1	K	Transcription	NAC transcription factor [Panicum virgatum]	molecular function: binding (GO:0005488);; biological process: biological regulation (GO:0065007)	--
BMK_Unigene_084930	NAC	TF	5.28446e-06	2.15166	up	4.69624e-08	2.47337	up	1.58694e-10	2.68342	up	8.60966e-13	2.62981	up	--	--	Molecular Function: DNA binding (GO:0003677);; Biological Process: regulation of transcription, DNA-templated (GO:0006355);;	--	--	--	No apical meristem (NAM) protein	NAC domain-containing protein 67 OS=Oryza sativa subsp. japonica (Rice) PE=2 SV=1	--	--	NAC transcription factor [Panicum virgatum]	molecular function: binding (GO:0005488);; biological process: biological regulation (GO:0065007)	--
BMK_Unigene_091690	NAC	TF	0.000146271	1.92701	up	0.00077295	1.90975	up	0.00458498	2.03401	up	0.00133357	1.71146	up	--	--	Molecular Function: DNA binding (GO:0003677);; Biological Process: regulation of transcription, DNA-templated (GO:0006355);;	--	--	--	No apical meristem (NAM) protein	NAC domain-containing protein 68 OS=Oryza sativa subsp. japonica (Rice) PE=2 SV=1	K	Transcription	PREDICTED: NAC domain-containing protein 67-like [Setaria italica]	molecular function: binding (GO:0005488);; biological process: biological regulation (GO:0065007)	--
BMK_Unigene_015404	WRKY	TF	2.03311e-11	3.18567	up	1.27083e-15	3.80792	up	0.000127407	2.58302	up	9.82399e-12	3.34106	up	--	--	Molecular Function: sequence-specific DNA binding transcription factor activity (GO:0003700);; Biological Process: regulation of transcription, DNA-templated (GO:0006355);; Molecular Function: sequence-specific DNA binding (GO:0043565);;	--	--	--	WRKY DNA -binding domain	WRKY transcription factor 22 OS=Arabidopsis thaliana (Mouse-ear cress) PE=2 SV=1	R	General function prediction only	hypothetical protein SORBIDRAFT_10g020010 [Sorghum bicolor]	biological process: biological regulation (GO:0065007);; molecular function: nucleic acid binding transcription factor activity (GO:0001071);; molecular function: binding (GO:0005488)	--
