# Supplementary material for: De novo transcriptome in roots of switchgrass (Panicum virgatum L.) reveals gene expression dynamic and act network under alkaline salt stress
Source: BMC Genomics. 2021 Jan 28;22:82. doi: 10.1186/s12864-021-07368-w (PMC7841905; doi:10.1186/s12864-021-07368-w)
Supplement: Supplementary file 16 — Additional file 16: Table S14. Summary of differentially expressed TF genes only in Alamo (T) under alkaline salt stress. [file 12864_2021_7368_MOESM16_ESM.xlsx]

## Sheet: Sheet1
TF differentially expressed only in T at 6 h
#ID	Family	Type	FDR-S0/S6	Log2FC-S0/S6	S0/S6	FDR-S0/S24	Log2FC-S0/S24	S0/S24	FDR-T0/T24	Log2FC-T0/T24	T0/T6	FDR-T0/T24	Log2FC-T0/T24	T0/T24	COG_class	COG_class_annotation	GO_annotation	KEGG_annotation	KOG_class	KOG_class_annotation	Pfam_annotation	Swissprot_annotation	eggNOG_class	eggNOG_class_annotation	nr_annotation	GO_second_level_annotation	KEGG_pathway_annotation
BMK_Unigene_010382	bZIP	TF	0.06644	1.63598	normal	0.985731	-0.0294606	normal	4.04437e-05	5.25579	up	0.896373	0.403764	normal	--	--	--	--	[K]	Transcription	bZIP transcription factor;; Basic region leucine zipper	--	S	Function unknown	hypothetical protein S40285_06354 [Stachybotrys chlorohalonata IBT 40285]	--	--
TF differentially expressed only in T at 24 h
#ID	Family	Type	FDR-S0/S6	Log2FC-S0/S6	S0/S6	FDR-S0/S24	Log2FC-S0/S24	S0/S24	FDR-T0/T24	Log2FC-T0/T24	T0/T6	FDR-T0/T24	Log2FC-T0/T24	T0/T24	COG_class	COG_class_annotation	GO_annotation	KEGG_annotation	KOG_class	KOG_class_annotation	Pfam_annotation	Swissprot_annotation	eggNOG_class	eggNOG_class_annotation	nr_annotation	GO_second_level_annotation	KEGG_pathway_annotation
BMK_Unigene_003081	GRAS	TF	0.613943	-0.378347	normal	0.250527	-0.891678	normal	0.751897	-0.496833	normal	0.00477488	-1.62413	down	--	--	--	--	--	--	GRAS domain family	--	S	Function unknown	PREDICTED: uncharacterized protein LOC103643812 [Zea mays]	--	--
BMK_Unigene_005593	C2H2	TF	0.786824	0.334085	normal	0.0882456	-1.86023	normal	0.0376334	-1.94887	normal	8.27018e-05	-2.62187	down	--	--	Molecular Function: metal ion binding (GO:0046872);;	--	[R]	General function prediction only	C2H2-type zinc finger;; Zinc-finger double-stranded RNA-binding;; Zinc-finger double domain	Zinc finger protein ZAT10 GN=T22C5.18 OS=Arabidopsis thaliana (Mouse-ear cress) PE=2 SV=1	R	General function prediction only	PREDICTED: zinc finger protein ZAT6-like [Zea mays]	molecular function: binding (GO:0005488)	--
BMK_Unigene_006504	RWP-RK	TF	0.152342	-0.940297	normal	0.096645	-1.12852	normal	0.245693	-0.817283	normal	0.00838406	-1.1758	down	--	--	--	--	--	--	RWP-RK domain;; PB1 domain	Protein NLP5 GN=NLP5 OS=Arabidopsis thaliana (Mouse-ear cress) PE=2 SV=1	K	Transcription	PREDICTED: protein NLP1-like isoform X2 [Setaria italica]	--	--
BMK_Unigene_007967	HSF	TF	0.60326	1.71485	normal	0.896319	-0.471553	normal	0.283305	-2.29925	normal	6.89655e-06	-5.19983	down	[K]	Transcription	Molecular Function: sequence-specific DNA binding transcription factor activity (GO:0003700);; Cellular Component: nucleus (GO:0005634);; Biological Process: regulation of transcription, DNA-templated (GO:0006355);; Molecular Function: sequence-specific DNA binding (GO:0043565);;	K09419|1.61868e-15|brp:103862516|heat stress transcription factor B-1-like; K09419 heat shock transcription factor, other eukaryote (A)	[K]	Transcription	HSF-type DNA-binding	Heat stress transcription factor A-2e OS=Oryza sativa subsp. japonica (Rice) PE=2 SV=1	--	--	hypothetical protein PHYSODRAFT_360816 [Phytophthora sojae]	biological process: biological regulation (GO:0065007);; molecular function: nucleic acid binding transcription factor activity (GO:0001071);; cellular component: cell (GO:0005623);; cellular component: organelle (GO:0043226);; cellular component: cell part (GO:0044464);; molecular function: binding (GO:0005488)	--
BMK_Unigene_016175	AP2/ERF-ERF	TF	0.0805823	-0.81349	normal	0.267909	-0.882554	normal	0.751897	-0.306352	normal	0.00832963	-1.06231	down	--	--	Molecular Function: DNA binding (GO:0003677);; Molecular Function: sequence-specific DNA binding transcription factor activity (GO:0003700);; Cellular Component: nucleus (GO:0005634);; Biological Process: regulation of transcription, DNA-templated (GO:0006355);; Cellular Component: cytoplasmic membrane-bounded vesicle (GO:0016023);;	K17338|6.88594e-110|sita:101754816|HVA22-like protein j-like; K17338 receptor expression-enhancing protein 1/2/3/4 (A)	[V]	Defense mechanisms	AP2 domain;; TB2/DP1, HVA22 family	HVA22-like protein j GN=HVA22J OS=Arabidopsis thaliana (Mouse-ear cress) PE=2 SV=2	V	Defense mechanisms	PREDICTED: HVA22-like protein j-like isoform X2 [Setaria italica]	molecular function: binding (GO:0005488);; biological process: biological regulation (GO:0065007);; molecular function: nucleic acid binding transcription factor activity (GO:0001071);; cellular component: cell (GO:0005623);; cellular component: organelle (GO:0043226);; cellular component: cell part (GO:0044464)	--
BMK_Unigene_020127	MYB-related	TF	0.579117	0.952777	normal	0.693804	-0.761736	normal	0.76771	-0.673927	normal	0.00177835	-4.1508	down	--	--	Molecular Function: DNA binding (GO:0003677);; Molecular Function: chromatin binding (GO:0003682);; Molecular Function: catalytic activity (GO:0003824);; Biological Process: metabolic process (GO:0008152);;	K09422|7.04778e-21|sita:101771368|myb-related protein Myb4-like; K09422 myb proto-oncogene protein, plant (A)	[K]	Transcription	Myb-like DNA-binding domain;; Myb-like DNA-binding domain	Transcription factor MYB24 GN=MYB24 OS=Arabidopsis thaliana (Mouse-ear cress) PE=1 SV=1	K	Transcription	PREDICTED: myb-related protein Myb4-like [Setaria italica]	molecular function: binding (GO:0005488);; biological process: metabolic process (GO:0008152);; molecular function: catalytic activity (GO:0003824)	--
BMK_Unigene_042590	NAC	TF	0.772438	-0.412392	normal	0.530854	-1.12322	normal	0.610703	-1.12232	normal	0.00369916	-3.24576	down	--	--	--	--	--	--	No apical meristem (NAM) protein	Putative NAC domain-containing protein 94 GN=ANAC094 OS=Arabidopsis thaliana (Mouse-ear cress) PE=3 SV=1	S	Function unknown	PREDICTED: NAC transcription factor ONAC010-like [Setaria italica]	--	--
BMK_Unigene_043547	MADS-M-type	TF	0.976622	-0.0216749	normal	0.0792916	-0.999464	normal	0.0506947	-1.16074	normal	0.00549863	-1.02283	down	--	--	Molecular Function: DNA binding (GO:0003677);; Molecular Function: sequence-specific DNA binding transcription factor activity (GO:0003700);; Cellular Component: nucleus (GO:0005634);; Biological Process: regulation of transcription, DNA-templated (GO:0006355);; Molecular Function: protein dimerization activity (GO:0046983);;	--	[K]	Transcription	SRF-type transcription factor (DNA-binding and dimerisation domain)	MADS-box transcription factor 21 OS=Oryza sativa subsp. japonica (Rice) PE=2 SV=1	K	Transcription	PREDICTED: zea AGAMOUS homolog2 isoform X3 [Zea mays]	molecular function: binding (GO:0005488);; biological process: biological regulation (GO:0065007);; molecular function: nucleic acid binding transcription factor activity (GO:0001071);; cellular component: cell (GO:0005623);; cellular component: organelle (GO:0043226);; cellular component: cell part (GO:0044464)	--
BMK_Unigene_044205	NAC	TF	0.0255746	2.14675	normal	0.915566	0.204291	normal	0.345905	-1.35473	normal	0.000432994	-2.83489	down	--	--	Molecular Function: sequence-specific DNA binding transcription factor activity (GO:0003700);; Biological Process: regulation of transcription, DNA-templated (GO:0006355);; Molecular Function: sequence-specific DNA binding (GO:0043565);;	--	--	--	No apical meristem (NAM) protein	NAC domain-containing protein 78 GN=T32M21.10 OS=Arabidopsis thaliana (Mouse-ear cress) PE=2 SV=2	S	Function unknown	PREDICTED: NAC domain-containing protein 68-like isoform X1 [Setaria italica]	biological process: biological regulation (GO:0065007);; molecular function: nucleic acid binding transcription factor activity (GO:0001071);; molecular function: binding (GO:0005488)	--
BMK_Unigene_078244	HB-other	TF	0.172802	-1.08992	normal	0.683745	-0.5616	normal	0.716623	-0.850915	normal	0.000322814	-2.17032	down	--	--	Molecular Function: sequence-specific DNA binding transcription factor activity (GO:0003700);; Cellular Component: nucleus (GO:0005634);; Biological Process: regulation of transcription, DNA-templated (GO:0006355);; Molecular Function: sequence-specific DNA binding (GO:0043565);;	K09338|3.36342e-23|sita:101779903|homeobox-leucine zipper protein HOX7-like; K09338 homeobox-leucine zipper protein (A)	[K]	Transcription	Homeobox domain	Homeobox-leucine zipper protein HOX7 GN=P0020C11.33 OS=Oryza sativa subsp. japonica (Rice) PE=1 SV=1	K	Transcription	PREDICTED: homeobox-leucine zipper protein HOX7-like [Setaria italica]	biological process: biological regulation (GO:0065007);; molecular function: nucleic acid binding transcription factor activity (GO:0001071);; cellular component: cell (GO:0005623);; cellular component: organelle (GO:0043226);; cellular component: cell part (GO:0044464);; molecular function: binding (GO:0005488)	--
BMK_Unigene_084716	bHLH	TF	0.719149	0.283304	normal	0.60599	0.492759	normal	0.421152	-0.897382	normal	0.000111916	-2.07361	down	--	--	Molecular Function: protein dimerization activity (GO:0046983);;	--	--	--	Helix-loop-helix DNA-binding domain	Transcription factor bHLH25 GN=T28I19.130 OS=Arabidopsis thaliana (Mouse-ear cress) PE=2 SV=2	R	General function prediction only	PREDICTED: transcription factor bHLH25-like [Setaria italica]	molecular function: binding (GO:0005488)	--
BMK_Unigene_084813	GARP-G2-like	TF	0.60326	0.990851	normal	0.833715	-0.568795	normal	0.190038	-1.52372	normal	4.64405e-05	-2.87375	down	--	--	--	--	--	--	Myb-like DNA-binding domain	Transcription factor BOA GN=F2O15.230 OS=Arabidopsis thaliana (Mouse-ear cress) PE=2 SV=1	--	--	PREDICTED: uncharacterized protein LOC101769398 [Setaria italica]	--	--
BMK_Unigene_088779	B3	TF	0.179155	-2.25574	normal	0.190004	-2.34943	normal	0.751897	-0.86654	normal	0.00630362	-3.31574	down	--	--	Molecular Function: DNA binding (GO:0003677);; Cellular Component: nucleus (GO:0005634);; Biological Process: regulation of transcription, DNA-templated (GO:0006355);; Biological Process: auxin-activated signaling pathway (GO:0009734);; Biological Process: flower development (GO:0009908);; Molecular Function: protein dimerization activity (GO:0046983);;	--	--	--	B3 DNA binding domain	Auxin response factor 25 OS=Oryza sativa subsp. japonica (Rice) PE=2 SV=1	--	--	PREDICTED: auxin response factor 25-like [Setaria italica]	molecular function: binding (GO:0005488);; cellular component: cell (GO:0005623);; cellular component: organelle (GO:0043226);; cellular component: cell part (GO:0044464);; biological process: biological regulation (GO:0065007);; biological process: cellular process (GO:0009987);; biological process: signaling (GO:0023052);; biological process: single-organism process (GO:0044699);; biological pr…	--
BMK_Unigene_089287	C2C2-Dof	TF	0.607526	-0.454457	normal	0.218028	-1.25644	normal	0.963581	0.141375	normal	0.00591281	-1.43383	down	--	--	Cellular Component: GINS complex (GO:0000811);; Biological Process: DNA replication initiation (GO:0006270);; Biological Process: regulation of DNA replication (GO:0006275);; Biological Process: regulation of cell cycle (GO:0051726);;	K10735|4.62667e-69|sita:101781974|DNA replication complex GINS protein SLD5-like; K10735 GINS complex subunit 4 (A)	--	--	Dof domain, zinc finger;; GINS complex protein	Dof zinc finger protein DOF1.7 GN=F19C24.9 OS=Arabidopsis thaliana (Mouse-ear cress) PE=2 SV=1	L	Replication, recombination and repair	hypothetical protein SHCRBa_022_B01_F_250 [Saccharum hybrid cultivar R570]	cellular component: cell (GO:0005623);; cellular component: membrane-enclosed lumen (GO:0031974);; cellular component: macromolecular complex (GO:0032991);; cellular component: organelle (GO:0043226);; cellular component: organelle part (GO:0044422);; cellular component: cell part (GO:0044464);; biological process: metabolic process (GO:0008152);; biological process: cellular process (GO:0009987)…	--
BMK_Unigene_091298	CSD	TF	0.0118419	-1.5989	normal	0.641454	-0.592158	normal	0.770359	-0.356307	normal	0.00115872	-2.05739	down	[K]	Transcription	Molecular Function: double-stranded DNA binding (GO:0003690);; Molecular Function: single-stranded DNA binding (GO:0003697);; Molecular Function: mRNA binding (GO:0003729);; Cellular Component: nucleolus (GO:0005730);; Cellular Component: cytoplasm (GO:0005737);; Cellular Component: plasma membrane (GO:0005886);; Biological Process: regulation of transcription, DNA-templated (GO:0006355);; Molecu…	--	[J]	Translation, ribosomal structure and biogenesis	'Cold-shock' DNA-binding domain;; Ribonuclease B OB domain	Cold shock protein 1 GN=T19K4.150 OS=Arabidopsis thaliana (Mouse-ear cress) PE=1 SV=1	J	Translation, ribosomal structure and biogenesis	PREDICTED: glycine-rich protein 2-like [Setaria italica]	molecular function: binding (GO:0005488);; cellular component: cell (GO:0005623);; cellular component: membrane-enclosed lumen (GO:0031974);; cellular component: organelle (GO:0043226);; cellular component: organelle part (GO:0044422);; cellular component: cell part (GO:0044464);; cellular component: membrane (GO:0016020);; biological process: biological regulation (GO:0065007);; biological proce…	--
BMK_Unigene_004019	FAR1	TF	0.271975	1.97509	normal	0.96619	0.147898	normal	0.751897	-0.92683	normal	6.60722e-06	2.1025	up	--	--	--	--	--	--	MULE transposase domain;; FAR1 DNA-binding domain;; SWIM zinc finger	Protein FAR1-RELATED SEQUENCE 5 GN=FRS5 OS=Arabidopsis thaliana (Mouse-ear cress) PE=2 SV=1	S	Function unknown	Protein FAR1-RELATED SEQUENCE 5 [Aegilops tauschii]	--	--
BMK_Unigene_007897	GRAS	TF	0.887567	-0.0902884	normal	0.0655222	0.958931	normal	0.728316	0.478446	normal	0.00572855	1.10658	up	--	--	Biological Process: regulation of transcription, DNA-templated (GO:0006355);;	--	--	--	GRAS domain family	Scarecrow-like protein 8 GN=SCL8 OS=Arabidopsis thaliana (Mouse-ear cress) PE=2 SV=1	--	--	PREDICTED: scarecrow-like protein 8-like [Setaria italica]	biological process: biological regulation (GO:0065007)	--
BMK_Unigene_009661	MYB-related	TF	0.0184435	0.959392	normal	0.0753505	0.871319	normal	0.215208	0.825419	normal	0.00335908	1.08423	up	--	--	Molecular Function: DNA binding (GO:0003677);; Molecular Function: chromatin binding (GO:0003682);; Molecular Function: zinc ion binding (GO:0008270);; Cellular Component: plastid (GO:0009536);; Biological Process: response to salt stress (GO:0009651);; Biological Process: response to ethylene (GO:0009723);; Biological Process: response to abscisic acid (GO:0009737);; Biological Process: response…	--	--	--	Myb-like DNA-binding domain	Transcription factor MYB1R1 OS=Solanum tuberosum (Potato) PE=2 SV=1	K	Transcription	PREDICTED: transcription factor MYB1R1-like [Setaria italica]	molecular function: binding (GO:0005488);; cellular component: cell (GO:0005623);; cellular component: organelle (GO:0043226);; cellular component: cell part (GO:0044464);; biological process: response to stimulus (GO:0050896)	--
BMK_Unigene_010992	AP2/ERF-ERF	TF	0.210121	-1.5742	normal	0.501572	-1.64142	normal	0.46476	1.51656	normal	0.00411735	2.00654	up	--	--	Molecular Function: DNA binding (GO:0003677);; Molecular Function: sequence-specific DNA binding transcription factor activity (GO:0003700);; Cellular Component: nucleus (GO:0005634);; Cellular Component: mitochondrion (GO:0005739);; Biological Process: regulation of transcription, DNA-templated (GO:0006355);;	K09285|1.81161e-123|sita:101761227|AP2-like ethylene-responsive transcription factor AIL5-like; K09285 AP2-like factor, ANT lineage (A)	--	--	AP2 domain	AP2-like ethylene-responsive transcription factor AIL5 GN=AIL5 OS=Arabidopsis thaliana (Mouse-ear cress) PE=2 SV=2	K	Transcription	PREDICTED: AP2-like ethylene-responsive transcription factor AIL5-like [Setaria italica]	molecular function: binding (GO:0005488);; biological process: biological regulation (GO:0065007);; molecular function: nucleic acid binding transcription factor activity (GO:0001071);; cellular component: cell (GO:0005623);; cellular component: organelle (GO:0043226);; cellular component: cell part (GO:0044464)	--
BMK_Unigene_013105	zn-clus	TF	0.153084	-3.5323	normal	0.617902	-1.82691	normal	0.930263	0.292611	normal	0.000110469	2.68788	up	--	--	--	--	--	--	Fungal Zn(2)-Cys(6) binuclear cluster domain;; Fungal specific transcription factor domain;; RTA1 like protein	--	S	Function unknown	hypothetical protein COCSADRAFT_36572 [Bipolaris sorokiniana ND90Pr]	--	--
BMK_Unigene_014433	zn-clus	TF	0.0166908	-4.67635	normal	0.0836793	-3.3885	normal	0.496802	1.77786	normal	1.96913e-05	2.94462	up	[R]	General function prediction only	--	--	[E]	Amino acid transport and metabolism	Bacterial transferase hexapeptide (six repeats);; Hexapeptide repeat of succinyl-transferase;; Fungal Zn(2)-Cys(6) binuclear cluster domain;; Maltose acetyltransferase	--	E	Amino acid transport and metabolism	similar to maltose O-acetyltransferase [Leptosphaeria maculans JN3]	--	--
BMK_Unigene_015196	FAR1	TF	0.0611336	-2.59974	normal	0.144079	1.63001	normal	0.751897	0.94198	normal	9.93782e-08	1.54969	up	--	--	Molecular Function: binding (GO:0005488);;	--	--	--	FAR1 DNA-binding domain;; MULE transposase domain;; SWIM zinc finger	Protein FAR1-RELATED SEQUENCE 5 GN=FRS5 OS=Arabidopsis thaliana (Mouse-ear cress) PE=2 SV=1	--	--	hypothetical protein SORBIDRAFT_08g016320 [Sorghum bicolor]	molecular function: binding (GO:0005488)	--
BMK_Unigene_034933	CSD	TF	0.69834	-0.850067	normal	0.391241	1.35403	normal	0.715267	1.54268	normal	5.09984e-06	4.18049	up	[K]	Transcription	Molecular Function: binding (GO:0005488);;	--	[J]	Translation, ribosomal structure and biogenesis	'Cold-shock' DNA-binding domain	Glycine-rich protein 2 GN=GRP-2 OS=Nicotiana sylvestris (Wood tobacco) PE=2 SV=1	K	Transcription	predicted protein [Hordeum vulgare subsp. vulgare]	molecular function: binding (GO:0005488)	--
BMK_Unigene_046985	bZIP	TF	0.964673	-0.130672	normal	0.57949	1.53381	normal	0.751897	1.11758	normal	8.4733e-06	5.70703	up	--	--	Molecular Function: sequence-specific DNA binding transcription factor activity (GO:0003700);; Biological Process: regulation of transcription, DNA-templated (GO:0006355);; Molecular Function: sequence-specific DNA binding (GO:0043565);;	--	--	--	bZIP transcription factor;; Basic region leucine zipper	--	--	--	bZIP transcription factor [Colletotrichum gloeosporioides Nara gc5]	biological process: biological regulation (GO:0065007);; molecular function: nucleic acid binding transcription factor activity (GO:0001071);; molecular function: binding (GO:0005488)	--
BMK_Unigene_051214	C2C2-CO-like	TF	0.658915	0.578253	normal	0.602371	0.980024	normal	0.597165	1.48007	normal	0.00712397	2.69574	up	--	--	Molecular Function: DNA binding (GO:0003677);; Cellular Component: nucleus (GO:0005634);; Cellular Component: plasma membrane (GO:0005886);; Molecular Function: zinc ion binding (GO:0008270);; Biological Process: negative regulation of long-day photoperiodism, flowering (GO:0048579);;	--	--	--	CCT motif;; B-box zinc finger	Zinc finger protein CONSTANS-LIKE 9 GN=COL9 OS=Arabidopsis thaliana (Mouse-ear cress) PE=2 SV=1	R	General function prediction only	PREDICTED: zinc finger protein CONSTANS-LIKE 9-like [Setaria italica]	molecular function: binding (GO:0005488);; cellular component: cell (GO:0005623);; cellular component: organelle (GO:0043226);; cellular component: cell part (GO:0044464);; cellular component: membrane (GO:0016020);; biological process: biological regulation (GO:0065007)	--
BMK_Unigene_052034	NAC	TF	0.0610882	0.84158	normal	0.0451712	1.0113	normal	0.615556	0.664831	normal	0.00726498	1.22559	up	--	--	Molecular Function: DNA binding (GO:0003677);; Biological Process: regulation of transcription, DNA-templated (GO:0006355);;	--	--	--	No apical meristem (NAM) protein	NAC domain-containing protein 78 GN=T32M21.10 OS=Arabidopsis thaliana (Mouse-ear cress) PE=2 SV=2	S	Function unknown	PREDICTED: uncharacterized protein LOC101763561 [Setaria italica]	molecular function: binding (GO:0005488);; biological process: biological regulation (GO:0065007)	--
BMK_Unigene_070685	C2H2	TF	0.566053	-1.89631	normal	0.62878	-1.78567	normal	0.751897	0.917151	normal	0.00955074	2.50665	up	--	--	--	--	[R]	General function prediction only	Zinc-finger double-stranded RNA-binding;; Zinc-finger of C2H2 type;; Zinc finger, C2H2 type;; C2H2-type zinc finger;; C2H2-type zinc finger;; C2H2 type zinc-finger (2 copies);; zinc-finger of a C2HC-type	--	R	General function prediction only	hypothetical protein COCCADRAFT_112852 [Bipolaris zeicola 26-R-13]	--	--
BMK_Unigene_072504	MYB-related	TF	0.950757	0.0690318	normal	0.666252	0.358462	normal	0.0954995	1.39431	normal	0.00179867	1.8002	up	--	--	Molecular Function: DNA binding (GO:0003677);; Molecular Function: chromatin binding (GO:0003682);; Cellular Component: nucleus (GO:0005634);;	--	[O]	Posttranslational modification, protein turnover, chaperones	Myb-like DNA-binding domain	--	K	Transcription	hypothetical protein SORBIDRAFT_01g029350 [Sorghum bicolor]	molecular function: binding (GO:0005488);; cellular component: cell (GO:0005623);; cellular component: organelle (GO:0043226);; cellular component: cell part (GO:0044464)	--
BMK_Unigene_074035	bZIP	TF	0.214937	1.73372	normal	0.184896	1.85928	normal	0.951733	-0.270564	normal	1.04628e-05	4.99401	up	--	--	Molecular Function: sequence-specific DNA binding transcription factor activity (GO:0003700);; Biological Process: regulation of transcription, DNA-templated (GO:0006355);; Molecular Function: sequence-specific DNA binding (GO:0043565);;	--	--	--	bZIP transcription factor	--	S	Function unknown	bZIP transcription factor [Colletotrichum fioriniae PJ7]	biological process: biological regulation (GO:0065007);; molecular function: nucleic acid binding transcription factor activity (GO:0001071);; molecular function: binding (GO:0005488)	--
BMK_Unigene_074683	zn-clus	TF	0.247117	-3.05712	normal	0.650012	-1.55101	normal	0.103555	2.58603	normal	2.46059e-15	4.14179	up	--	--	Biological Process: regulation of transcription, DNA-templated (GO:0006355);; Biological Process: transcription from RNA polymerase II promoter (GO:0006366);; Molecular Function: metal ion binding (GO:0046872);;	--	--	--	Fungal specific transcription factor domain;; Fungal Zn(2)-Cys(6) binuclear cluster domain	--	S	Function unknown	hypothetical protein SNOG_14714 [Phaeosphaeria nodorum SN15]	biological process: biological regulation (GO:0065007);; biological process: metabolic process (GO:0008152);; biological process: cellular process (GO:0009987);; molecular function: binding (GO:0005488)	--
BMK_Unigene_080704	bHLH	TF	0.0263588	-4.47156	normal	0.115341	-3.24066	normal	0.991566	0.0310082	normal	0.00643733	1.88169	up	--	--	Molecular Function: protein dimerization activity (GO:0046983);;	--	--	--	Helix-loop-helix DNA-binding domain	--	K	Transcription	hypothetical protein SNOG_15057 [Phaeosphaeria nodorum SN15]	molecular function: binding (GO:0005488)	--
BMK_Unigene_085413	HSF	TF	0.820289	-0.19252	normal	0.962297	-0.0633919	normal	0.751897	0.444791	normal	0.000350468	1.44932	up	[K]	Transcription	Molecular Function: sequence-specific DNA binding transcription factor activity (GO:0003700);; Cellular Component: nucleus (GO:0005634);; Biological Process: regulation of transcription, DNA-templated (GO:0006355);; Biological Process: response to heat (GO:0009408);; Molecular Function: sequence-specific DNA binding (GO:0043565);;	K09419|5.87417e-107|sita:101759317|heat stress transcription factor C-2b-like; K09419 heat shock transcription factor, other eukaryote (A)	[K]	Transcription	HSF-type DNA-binding	Heat stress transcription factor C-2b OS=Oryza sativa subsp. japonica (Rice) PE=3 SV=1	K	Transcription	PREDICTED: heat stress transcription factor C-2b-like [Setaria italica]	biological process: biological regulation (GO:0065007);; molecular function: nucleic acid binding transcription factor activity (GO:0001071);; cellular component: cell (GO:0005623);; cellular component: organelle (GO:0043226);; cellular component: cell part (GO:0044464);; biological process: response to stimulus (GO:0050896);; molecular function: binding (GO:0005488)	--
BMK_Unigene_089830	bZIP	TF	0.0418562	1.4584	normal	0.0336317	1.62598	normal	0.0649209	1.22413	normal	0.00406899	1.53804	up	--	--	Molecular Function: sequence-specific DNA binding transcription factor activity (GO:0003700);; Molecular Function: transporter activity (GO:0005215);; Biological Process: regulation of transcription, DNA-templated (GO:0006355);; Biological Process: transport (GO:0006810);; Cellular Component: membrane (GO:0016020);; Molecular Function: sequence-specific DNA binding (GO:0043565);;	--	--	--	Basic region leucine zipper;; bZIP transcription factor	Transcription factor RF2b GN=RF2b OS=Oryza sativa subsp. japonica (Rice) PE=1 SV=1	--	--	hypothetical protein SORBIDRAFT_07g025270 [Sorghum bicolor]	biological process: biological regulation (GO:0065007);; molecular function: nucleic acid binding transcription factor activity (GO:0001071);; biological process: localization (GO:0051179);; molecular function: transporter activity (GO:0005215);; cellular component: membrane (GO:0016020);; molecular function: binding (GO:0005488)	--
BMK_Unigene_090229	bZIP	TF	0.315713	0.877457	normal	0.650012	0.580245	normal	0.161989	1.34107	normal	0.00200901	1.74761	up	--	--	Molecular Function: sequence-specific DNA binding transcription factor activity (GO:0003700);; Cellular Component: nucleus (GO:0005634);; Biological Process: regulation of transcription, DNA-templated (GO:0006355);; Molecular Function: sequence-specific DNA binding (GO:0043565);;	K14432|5.63248e-70|sbi:SORBI_03g040970|SORBIDRAFT_03g040970, Sb03g040970; hypothetical protein; K14432 ABA responsive element binding factor (A)	--	--	bZIP transcription factor;; Basic region leucine zipper	G-box-binding factor 4 GN=F21M11.10 OS=Arabidopsis thaliana (Mouse-ear cress) PE=1 SV=1	K	Transcription	hypothetical protein SORBIDRAFT_03g040970 [Sorghum bicolor]	biological process: biological regulation (GO:0065007);; molecular function: nucleic acid binding transcription factor activity (GO:0001071);; cellular component: cell (GO:0005623);; cellular component: organelle (GO:0043226);; cellular component: cell part (GO:0044464);; molecular function: binding (GO:0005488)	Plant hormone signal transduction (ko04075)
4. TF differentially expressed only in T both at 6 and 24 h
#ID	Family	Type	FDR-S0/S6	Log2FC-S0/S6	S0/S6	FDR-S0/S24	Log2FC-S0/S24	S0/S24	FDR-T0/T24	Log2FC-T0/T24	T0/T6	FDR-T0/T24	Log2FC-T0/T24	T0/T24	COG_class	COG_class_annotation	GO_annotation	KEGG_annotation	KOG_class	KOG_class_annotation	Pfam_annotation	Swissprot_annotation	eggNOG_class	eggNOG_class_annotation	nr_annotation	GO_second_level_annotation	KEGG_pathway_annotation
BMK_Unigene_000899	B3	TF	0.152443	0.9794	normal	0.0326465	1.44405	normal	7.60441e-05	2.04999	up	0.000240373	1.3777	up	[M]	Cell wall/membrane/envelope biogenesis	Molecular Function: DNA binding (GO:0003677);; Molecular Function: sequence-specific DNA binding transcription factor activity (GO:0003700);; Cellular Component: nucleus (GO:0005634);; Biological Process: regulation of transcription, DNA-templated (GO:0006355);; Molecular Function: zinc ion binding (GO:0008270);; Cellular Component: plastid (GO:0009536);;	--	[M]	Cell wall/membrane/envelope biogenesis	B3 DNA binding domain;; CW-type Zinc Finger;; Cotton fibre expressed protein;; Domain of unknown function (DUF4408);; Choline/ethanolamine kinase;; Phosphotransferase enzyme family;; Ecdysteroid kinase	B3 domain-containing protein Os07g0563300 GN=OJ1720_F04.105 OS=Oryza sativa subsp. japonica (Rice) PE=3 SV=2	K	Transcription	PREDICTED: B3 domain-containing protein Os07g0563300-like [Setaria italica]	molecular function: binding (GO:0005488);; biological process: biological regulation (GO:0065007);; molecular function: nucleic acid binding transcription factor activity (GO:0001071);; cellular component: cell (GO:0005623);; cellular component: organelle (GO:0043226);; cellular component: cell part (GO:0044464)	--
BMK_Unigene_084840	bHLH	TF	0.306144	1.54446	normal	0.349922	1.47782	normal	0.00893497	1.88993	up	1.56968e-06	1.76995	up	--	--	Cellular Component: nucleus (GO:0005634);; Cellular Component: mitochondrion (GO:0005739);;	--	--	--	Helix-loop-helix DNA-binding domain	Putative transcription factor bHLH041 GN=MHM17.7 OS=Arabidopsis thaliana (Mouse-ear cress) PE=3 SV=1	--	--	PREDICTED: putative transcription factor bHLH041-like [Setaria italica]	cellular component: cell (GO:0005623);; cellular component: organelle (GO:0043226);; cellular component: cell part (GO:0044464)	--
BMK_Unigene_087641	bZIP	TF	0.127231	0.914196	normal	0.650012	0.572815	normal	0.00139562	1.92366	up	0.00243486	1.61271	up	--	--	Molecular Function: sequence-specific DNA binding transcription factor activity (GO:0003700);; Biological Process: regulation of transcription, DNA-templated (GO:0006355);; Biological Process: abscisic acid-activated signaling pathway (GO:0009738);; Molecular Function: sequence-specific DNA binding (GO:0043565);; Molecular Function: transcription regulatory region DNA binding (GO:0044212);;	K14432|9.69415e-147|sita:101765591|bZIP transcription factor TRAB1-like; K14432 ABA responsive element binding factor (A)	--	--	bZIP transcription factor;; Basic region leucine zipper	bZIP transcription factor TRAB1 OS=Oryza sativa subsp. japonica (Rice) PE=1 SV=1	--	--	PREDICTED: bZIP transcription factor TRAB1-like [Setaria italica]	biological process: biological regulation (GO:0065007);; molecular function: nucleic acid binding transcription factor activity (GO:0001071);; biological process: cellular process (GO:0009987);; biological process: signaling (GO:0023052);; biological process: single-organism process (GO:0044699);; biological process: response to stimulus (GO:0050896);; molecular function: binding (GO:0005488)	Plant hormone signal transduction (ko04075)
BMK_Unigene_040343	HB-WOX	TF	0.236671	0.881172	normal	0.21712	0.917152	normal	0.00158673	2.00563	up	7.82761e-06	2.24708	up	--	--	Molecular Function: sequence-specific DNA binding transcription factor activity (GO:0003700);; Cellular Component: nucleus (GO:0005634);; Biological Process: regulation of transcription, DNA-templated (GO:0006355);; Biological Process: multicellular organismal development (GO:0007275);; Molecular Function: sequence-specific DNA binding (GO:0043565);;	--	--	--	Homeobox domain	WUSCHEL-related homeobox 11 GN=WOX11 OS=Oryza sativa subsp. japonica (Rice) PE=2 SV=1	K	Transcription	PREDICTED: WUSCHEL-related homeobox 11-like isoform X1 [Zea mays]	biological process: biological regulation (GO:0065007);; molecular function: nucleic acid binding transcription factor activity (GO:0001071);; cellular component: cell (GO:0005623);; cellular component: organelle (GO:0043226);; cellular component: cell part (GO:0044464);; biological process: multicellular organismal process (GO:0032501);; biological process: developmental process (GO:0032502);; b…	--
BMK_Unigene_035195	MYB	TF	0.60326	1.00604	normal	0.650012	1.25655	normal	0.0014645	4.67009	up	0.00206007	4.45804	up	[KAD]	--	Molecular Function: DNA binding (GO:0003677);; Molecular Function: chromatin binding (GO:0003682);;	K09422|2.61098e-66|sita:101772233|myb-related protein MYBAS2-like; K09422 myb proto-oncogene protein, plant (A)	[K]	Transcription	Myb-like DNA-binding domain;; Myb-like DNA-binding domain	Myb-related protein 305 OS=Antirrhinum majus (Garden snapdragon) PE=2 SV=1	K	Transcription	PREDICTED: myb-related protein MYBAS2-like [Setaria italica]	molecular function: binding (GO:0005488)	--
BMK_Unigene_001920	MYB-related	TF	0.60326	0.357275	normal	0.214802	0.78309	normal	0.00889452	1.19106	up	0.000138279	1.17046	up	[JO]	--	Molecular Function: DNA binding (GO:0003677);; Molecular Function: chromatin binding (GO:0003682);; Cellular Component: nucleus (GO:0005634);;	K09522|0|sita:101784917|dnaJ homolog subfamily C member 2-like; K09522 DnaJ homolog subfamily C member 2 (A)	[O]	Posttranslational modification, protein turnover, chaperones	DnaJ domain;; Myb-like DNA-binding domain	Chaperone protein dnaJ 6 GN=MOJ9.8 OS=Arabidopsis thaliana (Mouse-ear cress) PE=2 SV=1	O	Posttranslational modification, protein turnover, chaperones	PREDICTED: dnaJ homolog subfamily C member 2-like isoform X1 [Setaria italica]	molecular function: binding (GO:0005488);; cellular component: cell (GO:0005623);; cellular component: organelle (GO:0043226);; cellular component: cell part (GO:0044464)	--
BMK_Unigene_072177	MYB-related	TF	0.0333495	2.68329	normal	0.43588	-2.25857	normal	0.000703531	3.53727	up	0.0016659	3.30601	up	--	--	Molecular Function: DNA binding (GO:0003677);; Molecular Function: chromatin binding (GO:0003682);;	--	[O]	Posttranslational modification, protein turnover, chaperones	Myb-like DNA-binding domain	Transcription factor DIVARICATA GN=DIVARICATA OS=Antirrhinum majus (Garden snapdragon) PE=2 SV=1	K	Transcription	PREDICTED: transcription factor DIVARICATA-like [Setaria italica]	molecular function: binding (GO:0005488)	--
BMK_Unigene_069001	RWP-RK	TF	0.25301	-3.01792	normal	0.33241	-2.78584	normal	0.000119481	-5.23574	down	1.29269e-05	-5.57747	down	--	--	--	--	--	--	--	--	--	--	--	--	--
