# Supplementary material for: De novo transcriptome in roots of switchgrass (Panicum virgatum L.) reveals gene expression dynamic and act network under alkaline salt stress
Source: BMC Genomics. 2021 Jan 28;22:82. doi: 10.1186/s12864-021-07368-w (PMC7841905; doi:10.1186/s12864-021-07368-w)
Supplement: Supplementary file 17 — Additional file 17: Table S15. Summary of 1718 protein kinases in response to alkaline salt stress. [file 12864_2021_7368_MOESM17_ESM.xlsx]

## Sheet: Sheet1
#ID	Family	Type	S0	S6	S24	T0	T6	T24	FDR-S0/S6	Log2FC-S0/S6	S0/S6	FDR-S0/S24	Log2FC-S0/S24	S0/S24	FDR-T0/T24	Log2FC-T0/T24	T0/T6	FDR-T0/T24	Log2FC-T0/T24	T0/T24	COG_class	COG_class_annotation	GO_annotation	KEGG_annotation	KOG_class	KOG_class_annotation	Pfam_annotation	Swissprot_annotation	eggNOG_class	eggNOG_class_annotation	nr_annotation	GO_second_level_annotation	KEGG_pathway_annotation
BMK_Unigene_001220	AGC_MAST	PK	19.0848	11.2221	11.927	19.5179	17.0579	11.8266	0.489063	-0.386593	normal	0.824559	-0.167763	normal	0.952355	0.0810579	normal	0.602005	-0.335509	normal	[RTKL]	--	Molecular Function: protein serine/threonine kinase activity (GO:0004674);; Molecular Function: protein tyrosine kinase activity (GO:0004713);; Molecular Function: ATP binding (GO:0005524);; Biological Process: protein phosphorylation (GO:0006468);;	--	[TR]	--	Protein kinase domain;; Protein tyrosine kinase	Probable serine/threonine protein kinase IREH1 {ECO:0000305} OS=Arabidopsis thaliana (Mouse-ear cress) PE=1 SV=1	T	Signal transduction mechanisms	PREDICTED: uncharacterized protein LOC101758234 [Setaria italica]	biological process: metabolic process (GO:0008152);; biological process: cellular process (GO:0009987);; molecular function: catalytic activity (GO:0003824);; biological process: single-organism process (GO:0044699);; molecular function: binding (GO:0005488)	--
BMK_Unigene_057278	AGC_MAST	PK	0.625175	0	0	0	0	0	0.60326	-1.61688	normal	0.650012	-1.49102	normal	--	--	--	--	--	--	[RTKL]	--	Molecular Function: phosphorelay response regulator activity (GO:0000156);; Biological Process: phosphorelay signal transduction system (GO:0000160);; Molecular Function: 3-beta-hydroxy-delta5-steroid dehydrogenase activity (GO:0003854);; Molecular Function: protein serine/threonine kinase activity (GO:0004674);; Molecular Function: ATP binding (GO:0005524);; Biological Process: regulation of tra…	--	[R]	General function prediction only	Protein kinase domain	Probable serine/threonine protein kinase IRE {ECO:0000305} OS=Arabidopsis thaliana (Mouse-ear cress) PE=2 SV=1	T	Signal transduction mechanisms	hypothetical protein SNOG_04203 [Phaeosphaeria nodorum SN15]	biological process: cellular process (GO:0009987);; biological process: signaling (GO:0023052);; biological process: single-organism process (GO:0044699);; biological process: response to stimulus (GO:0050896);; biological process: biological regulation (GO:0065007);; molecular function: molecular transducer activity (GO:0060089);; biological process: metabolic process (GO:0008152);; molecular fu…	--
BMK_Unigene_104539	AGC_MAST	PK	0.0987983	0	0	0	0.186668	0	--	--	--	--	--	--	0.751897	0.806257	normal	--	--	--	[RTKL]	--	Molecular Function: protein serine/threonine kinase activity (GO:0004674);; Molecular Function: ATP binding (GO:0005524);; Biological Process: protein phosphorylation (GO:0006468);;	--	[RT]	--	Protein kinase domain	Probable serine/threonine protein kinase IRE3 {ECO:0000305} OS=Arabidopsis thaliana (Mouse-ear cress) PE=2 SV=1	T	Signal transduction mechanisms	hypothetical protein FPSE_02016 [Fusarium pseudograminearum CS3096]	biological process: metabolic process (GO:0008152);; biological process: cellular process (GO:0009987);; molecular function: catalytic activity (GO:0003824);; molecular function: binding (GO:0005488)	--
BMK_Unigene_000037	AGC_NDR	PK	40.9299	40.3874	35.8984	44.7615	39.7649	32.8714	0.553151	0.357001	normal	0.650012	0.333189	normal	0.941	0.0899539	normal	0.913054	-0.0780575	normal	[RTKL]	--	Molecular Function: protein serine/threonine kinase activity (GO:0004674);; Molecular Function: ATP binding (GO:0005524);; Biological Process: protein phosphorylation (GO:0006468);;	K08790|0|sita:101764976|serine/threonine-protein kinase tricorner-like; K08790 serine/threonine kinase 38 [EC:2.7.11.1] (A)	[R]	General function prediction only	Protein kinase domain;; Protein tyrosine kinase;; Protein kinase C terminal domain	Probable serine/threonine protein kinase IRE {ECO:0000305} OS=Arabidopsis thaliana (Mouse-ear cress) PE=2 SV=1	T	Signal transduction mechanisms	PREDICTED: serine/threonine-protein kinase tricorner-like isoform X1 [Setaria italica]	biological process: metabolic process (GO:0008152);; biological process: cellular process (GO:0009987);; molecular function: catalytic activity (GO:0003824);; molecular function: binding (GO:0005488)	--
BMK_Unigene_016294	AGC_NDR	PK	0.915211	0.928376	0.676785	1.06984	0.948285	0.879429	0.688105	0.396076	normal	0.955674	0.0787683	normal	0.973735	0.0875807	normal	0.934396	0.0998361	normal	[RTKL]	--	Molecular Function: protein serine/threonine kinase activity (GO:0004674);; Molecular Function: protein tyrosine kinase activity (GO:0004713);; Molecular Function: ATP binding (GO:0005524);; Cellular Component: nucleus (GO:0005634);; Cellular Component: mitochondrion (GO:0005739);; Cellular Component: cytosol (GO:0005829);; Cellular Component: plasma membrane (GO:0005886);; Biological Process: pr…	K08790|0|sbi:SORBI_01g019410|SORBIDRAFT_01g019410, Sb01g019410; hypothetical protein; K08790 serine/threonine kinase 38 [EC:2.7.11.1] (A)	[R]	General function prediction only	Protein kinase domain;; Protein tyrosine kinase;; Protein kinase domain;; Protein tyrosine kinase	Probable serine/threonine protein kinase IRE {ECO:0000305} OS=Arabidopsis thaliana (Mouse-ear cress) PE=2 SV=1	T	Signal transduction mechanisms	hypothetical protein SORBIDRAFT_01g019410 [Sorghum bicolor]	biological process: metabolic process (GO:0008152);; biological process: cellular process (GO:0009987);; molecular function: catalytic activity (GO:0003824);; biological process: single-organism process (GO:0044699);; molecular function: binding (GO:0005488);; cellular component: cell (GO:0005623);; cellular component: organelle (GO:0043226);; cellular component: cell part (GO:0044464);; cellular…	--
BMK_Unigene_023833	AGC_NDR	PK	0.267103	0	0	0.0802631	0	0.420285	0.60326	-1.43069	normal	0.650012	-1.31475	normal	--	--	--	0.699326	0.902034	normal	[RTKL]	--	Molecular Function: protein serine/threonine kinase activity (GO:0004674);; Molecular Function: ATP binding (GO:0005524);; Biological Process: protein phosphorylation (GO:0006468);;	K08790|2.47472e-36|pxb:103950158|serine/threonine-protein kinase tricorner; K08790 serine/threonine kinase 38 [EC:2.7.11.1] (A)	[R]	General function prediction only	Protein kinase domain;; Protein tyrosine kinase	Serine/threonine-protein kinase AtPK1/AtPK6 GN=F17O14.20 OS=Arabidopsis thaliana (Mouse-ear cress) PE=1 SV=1	R	General function prediction only	hypothetical protein SNOG_07224 [Phaeosphaeria nodorum SN15]	biological process: metabolic process (GO:0008152);; biological process: cellular process (GO:0009987);; molecular function: catalytic activity (GO:0003824);; molecular function: binding (GO:0005488)	--
BMK_Unigene_046132	AGC_NDR	PK	16.1994	12.9823	13.0423	12.953	15.7745	10.161	0.596289	0.393399	normal	0.899059	0.117559	normal	0.751897	0.474535	normal	0.956543	-0.0593457	normal	[RTKL]	--	Molecular Function: protein serine/threonine kinase activity (GO:0004674);; Molecular Function: ATP binding (GO:0005524);; Biological Process: protein phosphorylation (GO:0006468);;	--	[R]	General function prediction only	Protein kinase domain;; Protein tyrosine kinase;; Protein kinase C terminal domain	Probable serine/threonine protein kinase IRE {ECO:0000305} OS=Arabidopsis thaliana (Mouse-ear cress) PE=2 SV=1	T	Signal transduction mechanisms	PREDICTED: serine/threonine-protein kinase CBK1-like [Setaria italica]	biological process: metabolic process (GO:0008152);; biological process: cellular process (GO:0009987);; molecular function: catalytic activity (GO:0003824);; molecular function: binding (GO:0005488)	--
BMK_Unigene_046340	AGC_NDR	PK	5.16816	1.99729	1.77101	4.40168	3.89686	4.67401	0.605565	1.25424	normal	0.616689	1.45792	normal	0.842073	0.622256	normal	0.17706	2.12503	normal	[RTKL]	--	Molecular Function: protein serine/threonine kinase activity (GO:0004674);; Molecular Function: protein tyrosine kinase activity (GO:0004713);; Molecular Function: ATP binding (GO:0005524);; Biological Process: protein phosphorylation (GO:0006468);;	--	[R]	General function prediction only	Protein kinase domain;; Protein tyrosine kinase;; Protein kinase C terminal domain	Probable serine/threonine protein kinase IREH1 {ECO:0000305} OS=Arabidopsis thaliana (Mouse-ear cress) PE=1 SV=1	T	Signal transduction mechanisms	PREDICTED: serine/threonine-protein kinase CBK1-like [Setaria italica]	biological process: metabolic process (GO:0008152);; biological process: cellular process (GO:0009987);; molecular function: catalytic activity (GO:0003824);; biological process: single-organism process (GO:0044699);; molecular function: binding (GO:0005488)	--
BMK_Unigene_058514	AGC_NDR	PK	0	0	0	0.0959395	0.100261	0.0959377	--	--	--	--	--	--	0.98512	0.0997974	normal	0.972123	0.11002	normal	[RTKL]	--	Molecular Function: protein serine/threonine kinase activity (GO:0004674);; Molecular Function: ATP binding (GO:0005524);; Biological Process: protein phosphorylation (GO:0006468);;	--	[R]	General function prediction only	Protein kinase domain	Probable serine/threonine protein kinase IRE {ECO:0000305} OS=Arabidopsis thaliana (Mouse-ear cress) PE=2 SV=1	R	General function prediction only	hypothetical protein PTT_18069 [Pyrenophora teres f. teres 0-1]	biological process: metabolic process (GO:0008152);; biological process: cellular process (GO:0009987);; molecular function: catalytic activity (GO:0003824);; molecular function: binding (GO:0005488)	--
BMK_Unigene_065149	AGC_NDR	PK	0	0.256665	0	0	0	0	0.60326	1.45297	normal	--	--	--	--	--	--	--	--	--	[RTKL]	--	Molecular Function: protein serine/threonine kinase activity (GO:0004674);; Molecular Function: ATP binding (GO:0005524);; Biological Process: protein phosphorylation (GO:0006468);;	--	[D]	Cell cycle control, cell division, chromosome partitioning	Protein kinase domain;; Protein tyrosine kinase	Probable serine/threonine protein kinase IRE4 {ECO:0000305} OS=Arabidopsis thaliana (Mouse-ear cress) PE=2 SV=1	T	Signal transduction mechanisms	serine/threonine protein kinase 19 [Chlamydomonas reinhardtii]	biological process: metabolic process (GO:0008152);; biological process: cellular process (GO:0009987);; molecular function: catalytic activity (GO:0003824);; molecular function: binding (GO:0005488)	--
BMK_Unigene_084259	AGC_NDR	PK	11.1516	7.62969	8.36358	11.3964	12.0542	7.36151	0.79355	0.379116	normal	0.827126	-0.40791	normal	0.751897	-0.526224	normal	0.25753	-1.35175	normal	[RTKL]	--	Molecular Function: protein serine/threonine kinase activity (GO:0004674);; Molecular Function: ATP binding (GO:0005524);; Biological Process: protein phosphorylation (GO:0006468);;	--	[R]	General function prediction only	Protein kinase domain;; Protein tyrosine kinase;; Phosphotransferase enzyme family	Probable serine/threonine protein kinase IRE {ECO:0000305} OS=Arabidopsis thaliana (Mouse-ear cress) PE=2 SV=1	T	Signal transduction mechanisms	PREDICTED: serine/threonine-protein kinase 38-like isoform X5 [Setaria italica]	biological process: metabolic process (GO:0008152);; biological process: cellular process (GO:0009987);; molecular function: catalytic activity (GO:0003824);; molecular function: binding (GO:0005488)	--
BMK_Unigene_087819	AGC_NDR	PK	6.54538	2.20327	1.76346	5.6318	4.62042	5.39334	0.868827	-0.328977	normal	0.650012	-1.09288	normal	0.483219	-1.35983	normal	0.533668	-1.23392	normal	[RTKL]	--	Molecular Function: protein serine/threonine kinase activity (GO:0004674);; Molecular Function: ATP binding (GO:0005524);; Biological Process: protein phosphorylation (GO:0006468);;	--	[R]	General function prediction only	Protein kinase domain;; Protein tyrosine kinase;; Protein kinase C terminal domain	Probable serine/threonine protein kinase IREH1 {ECO:0000305} OS=Arabidopsis thaliana (Mouse-ear cress) PE=1 SV=1	--	--	PREDICTED: serine/threonine-protein kinase CBK1-like [Setaria italica]	biological process: metabolic process (GO:0008152);; biological process: cellular process (GO:0009987);; molecular function: catalytic activity (GO:0003824);; molecular function: binding (GO:0005488)	--
BMK_Unigene_088408	AGC_NDR	PK	24.6158	17.7225	17.769	20.5096	23.1139	12.7491	0.887385	-0.0961653	normal	0.953918	0.0606835	normal	0.730062	0.436299	normal	0.684469	-0.30334	normal	[RTKL]	--	Molecular Function: protein serine/threonine kinase activity (GO:0004674);; Molecular Function: ATP binding (GO:0005524);; Biological Process: protein phosphorylation (GO:0006468);;	--	[R]	General function prediction only	Protein kinase domain;; Protein tyrosine kinase	Probable serine/threonine protein kinase IRE {ECO:0000305} OS=Arabidopsis thaliana (Mouse-ear cress) PE=2 SV=1	T	Signal transduction mechanisms	PREDICTED: serine/threonine-protein kinase CBK1-like [Setaria italica]	biological process: metabolic process (GO:0008152);; biological process: cellular process (GO:0009987);; molecular function: catalytic activity (GO:0003824);; molecular function: binding (GO:0005488)	--
BMK_Unigene_008307	AGC_PDK1	PK	14.4187	9.85848	8.54119	11.3895	14.1354	8.58165	0.876243	-0.103138	normal	0.710916	-0.231124	normal	0.548045	0.543535	normal	0.997869	0.00185849	normal	[RTKL]	--	Molecular Function: 3-phosphoinositide-dependent protein kinase activity (GO:0004676);; Molecular Function: protein tyrosine kinase activity (GO:0004713);; Molecular Function: ATP binding (GO:0005524);; Cellular Component: plasma membrane (GO:0005886);; Molecular Function: phosphatidylinositol binding (GO:0035091);; Biological Process: positive regulation of protein kinase activity (GO:0045860);;	K06276|0|sita:101769773|3-phosphoinositide-dependent protein kinase 2-like; K06276 3-phosphoinositide dependent protein kinase-1 [EC:2.7.11.1] (A)	[T]	Signal transduction mechanisms	Protein kinase domain;; PH domain;; Protein tyrosine kinase;; Kinase-like;; Protein kinase domain	3-phosphoinositide-dependent protein kinase 1 GN=T32M21.110 OS=Arabidopsis thaliana (Mouse-ear cress) PE=1 SV=1	T	Signal transduction mechanisms	PREDICTED: 3-phosphoinositide-dependent protein kinase 2-like [Setaria italica]	biological process: metabolic process (GO:0008152);; biological process: cellular process (GO:0009987);; molecular function: catalytic activity (GO:0003824);; biological process: single-organism process (GO:0044699);; molecular function: binding (GO:0005488);; cellular component: cell (GO:0005623);; cellular component: membrane (GO:0016020);; cellular component: cell part (GO:0044464);; biologica…	--
BMK_Unigene_103786	AGC_PDK1	PK	0	0	0.1176	0	0.110372	0	--	--	--	--	--	--	--	--	--	--	--	--	[RTKL]	--	Molecular Function: protein serine/threonine kinase activity (GO:0004674);; Molecular Function: ATP binding (GO:0005524);; Biological Process: protein phosphorylation (GO:0006468);;	K06276|9.50838e-16|ppp:PHYPADRAFT_144576|hypothetical protein; K06276 3-phosphoinositide dependent protein kinase-1 [EC:2.7.11.1] (A)	[T]	Signal transduction mechanisms	Protein kinase domain;; Protein tyrosine kinase	3-phosphoinositide-dependent protein kinase 1 GN=T32M21.110 OS=Arabidopsis thaliana (Mouse-ear cress) PE=1 SV=1	T	Signal transduction mechanisms	serine/threonine-protein kinase ksg1 [Magnaporthe oryzae Y34]	biological process: metabolic process (GO:0008152);; biological process: cellular process (GO:0009987);; molecular function: catalytic activity (GO:0003824);; molecular function: binding (GO:0005488)	--
BMK_Unigene_014079	AGC_PKA-PKG	PK	0.439827	1.64532	0.731112	0.0347403	0.325537	0.0497839	0.117201	2.09414	normal	0.650012	1.10905	normal	0.611578	1.80116	normal	0.920474	0.299689	normal	[RTKL]	--	Molecular Function: protein serine/threonine kinase activity (GO:0004674);; Molecular Function: ATP binding (GO:0005524);; Biological Process: protein phosphorylation (GO:0006468);;	K04688|5.21606e-41|vcn:VOLCADRAFT_58602|hypothetical protein; K04688 p70 ribosomal S6 kinase [EC:2.7.11.1] (A)	[RT]	--	Protein kinase domain;; Protein kinase C terminal domain;; Protein tyrosine kinase	Serine/threonine-protein kinase AtPK2/AtPK19 GN=F17O14.19 OS=Arabidopsis thaliana (Mouse-ear cress) PE=1 SV=2	T	Signal transduction mechanisms	putative serine threonine-protein kinase sck1 protein [Togninia minima UCRPA7]	biological process: metabolic process (GO:0008152);; biological process: cellular process (GO:0009987);; molecular function: catalytic activity (GO:0003824);; molecular function: binding (GO:0005488)	--
BMK_Unigene_032075	AGC_PKA-PKG	PK	0.237194	0	0	0.14576	0.226069	0.443775	0.60326	-1.43997	normal	0.650012	-1.32486	normal	0.931045	0.349632	normal	0.699326	1.07123	normal	[RTKL]	--	Molecular Function: protein serine/threonine kinase activity (GO:0004674);; Molecular Function: ATP binding (GO:0005524);; Biological Process: protein phosphorylation (GO:0006468);;	K13303|6.24444e-40|gsl:Gasu_13570|serine/threonine protein kinase (EC:2.7.11.1); K13303 serum/glucocorticoid-regulated kinase 2 [EC:2.7.11.1] (A)	[RT]	--	Protein kinase domain;; Protein tyrosine kinase;; Kinase-like	Serine/threonine-protein kinase AtPK1/AtPK6 GN=F17O14.20 OS=Arabidopsis thaliana (Mouse-ear cress) PE=1 SV=1	T	Signal transduction mechanisms	hypothetical protein SNOG_08418 [Phaeosphaeria nodorum SN15]	biological process: metabolic process (GO:0008152);; biological process: cellular process (GO:0009987);; molecular function: catalytic activity (GO:0003824);; molecular function: binding (GO:0005488)	--
BMK_Unigene_032369	AGC_PKA-PKG	PK	2.96524	0.562323	0.411838	0.0615551	0	0	0.190799	-1.87003	normal	0.0246574	-2.20613	normal	0.751897	-0.79458	normal	0.699326	-0.860962	normal	[RTKL]	--	Molecular Function: protein serine/threonine kinase activity (GO:0004674);; Molecular Function: ATP binding (GO:0005524);; Biological Process: protein phosphorylation (GO:0006468);;	K04345|1.50263e-26|bpg:Bathy17g00800|hypothetical protein; K04345 protein kinase A [EC:2.7.11.11] (A)	[T]	Signal transduction mechanisms	Protein kinase domain;; Protein tyrosine kinase	Serine/threonine-protein kinase Aurora-3 GN=AUR3 OS=Arabidopsis thaliana (Mouse-ear cress) PE=2 SV=1	T	Signal transduction mechanisms	cAMP-dependent protein kinase catalytic subunit alpha, putative [Phytophthora infestans T30-4]	biological process: metabolic process (GO:0008152);; biological process: cellular process (GO:0009987);; molecular function: catalytic activity (GO:0003824);; molecular function: binding (GO:0005488)	--
BMK_Unigene_042770	AGC_PKA-PKG	PK	2.87509	1.10081	0.660759	0.0706259	0	0	0.610601	-0.900588	normal	0.585433	-1.37192	normal	0.751897	-0.722927	normal	0.699326	-0.78243	normal	[RTKL]	--	Molecular Function: protein serine/threonine kinase activity (GO:0004674);; Molecular Function: ATP binding (GO:0005524);; Biological Process: protein phosphorylation (GO:0006468);; Cellular Component: cell part (GO:0044464);;	K13303|4.37185e-79|gsl:Gasu_13570|serine/threonine protein kinase (EC:2.7.11.1); K13303 serum/glucocorticoid-regulated kinase 2 [EC:2.7.11.1] (A)	[RT]	--	Protein kinase domain;; Protein tyrosine kinase;; Protein kinase C terminal domain	Serine/threonine-protein kinase AtPK2/AtPK19 GN=F17O14.19 OS=Arabidopsis thaliana (Mouse-ear cress) PE=1 SV=2	T	Signal transduction mechanisms	AGC protein kinase [Phytophthora parasitica INRA-310]	biological process: metabolic process (GO:0008152);; biological process: cellular process (GO:0009987);; molecular function: catalytic activity (GO:0003824);; molecular function: binding (GO:0005488);; cellular component: cell (GO:0005623);; cellular component: cell part (GO:0044464)	--
BMK_Unigene_051768	AGC_PKA-PKG	PK	8.91753	4.03614	7.7539	9.52131	6.75489	14.9403	0.969932	0.0490595	normal	0.371227	0.995518	normal	0.751897	-0.494677	normal	0.90478	0.159573	normal	[RTKL]	--	Biological Process: regulation of protein phosphorylation (GO:0001932);; Molecular Function: protein kinase activity (GO:0004672);; Molecular Function: protein serine/threonine phosphatase activity (GO:0004722);; Molecular Function: ATP binding (GO:0005524);; Cellular Component: plasma membrane (GO:0005886);; Cellular Component: cAMP-dependent protein kinase complex (GO:0005952);; Biological Proc…	--	[T]	Signal transduction mechanisms	Protein phosphatase 2C;; Cyclic nucleotide-binding domain;; Protein kinase domain;; Protein tyrosine kinase	Probable inactive cyclic nucleotide-dependent protein kinase At2g20050 GN=At2g20050/At2g20040 OS=Arabidopsis thaliana (Mouse-ear cress) PE=2 SV=2	--	--	PREDICTED: protein phosphatase 2C and cyclic nucleotide-binding/kinase domain-containing protein-like isoform X1 [Setaria italica]	biological process: biological regulation (GO:0065007);; biological process: metabolic process (GO:0008152);; biological process: cellular process (GO:0009987);; molecular function: catalytic activity (GO:0003824);; molecular function: binding (GO:0005488);; cellular component: cell (GO:0005623);; cellular component: membrane (GO:0016020);; cellular component: cell part (GO:0044464);; cellular co…	--
BMK_Unigene_062956	AGC_PKA-PKG	PK	0.175883	0	0	0.260031	0.342225	0	0.613943	-1.2798	normal	0.65547	-1.17449	normal	0.965165	0.2034	normal	0.699326	-0.889612	normal	[RTKL]	--	Molecular Function: protein kinase C activity (GO:0004697);; Molecular Function: ATP binding (GO:0005524);; Biological Process: protein phosphorylation (GO:0006468);; Biological Process: intracellular signal transduction (GO:0035556);; Molecular Function: metal ion binding (GO:0046872);;	K04456|6.57095e-28|pxb:103942822|RAC-gamma serine/threonine-protein kinase-like; K04456 RAC serine/threonine-protein kinase [EC:2.7.11.1] (A)	[T]	Signal transduction mechanisms	Protein kinase domain;; Protein tyrosine kinase	Serine/threonine-protein kinase AtPK2/AtPK19 GN=F17O14.19 OS=Arabidopsis thaliana (Mouse-ear cress) PE=1 SV=2	T	Signal transduction mechanisms	hypothetical protein COCCADRAFT_40957 [Bipolaris zeicola 26-R-13]	biological process: metabolic process (GO:0008152);; biological process: cellular process (GO:0009987);; molecular function: catalytic activity (GO:0003824);; molecular function: binding (GO:0005488);; biological process: signaling (GO:0023052);; biological process: single-organism process (GO:0044699);; biological process: response to stimulus (GO:0050896);; biological process: biological regula…	--
BMK_Unigene_065781	AGC_PKA-PKG	PK	0.752208	0.0748646	0.0783288	0	0	0.591647	0.452715	-2.05481	normal	0.545485	-1.90196	normal	--	--	--	0.130927	2.8959	normal	[RTKL]	--	Molecular Function: protein serine/threonine kinase activity (GO:0004674);; Molecular Function: ATP binding (GO:0005524);; Biological Process: protein phosphorylation (GO:0006468);;	K04345|8.85151e-36|ppp:PHYPADRAFT_126373|hypothetical protein; K04345 protein kinase A [EC:2.7.11.11] (A)	[T]	Signal transduction mechanisms	Protein kinase domain;; Protein tyrosine kinase	Serine/threonine-protein kinase AtPK2/AtPK19 GN=F17O14.19 OS=Arabidopsis thaliana (Mouse-ear cress) PE=1 SV=2	T	Signal transduction mechanisms	cAMP-dependent protein kinase [Verticillium dahliae VdLs.17]	biological process: metabolic process (GO:0008152);; biological process: cellular process (GO:0009987);; molecular function: catalytic activity (GO:0003824);; molecular function: binding (GO:0005488)	--
BMK_Unigene_092076	AGC_PKA-PKG	PK	8.90216	3.58233	7.07117	9.22713	6.70307	14.8853	0.0207671	-2.40261	normal	0.39017	-1.16892	normal	0.985584	0.0608149	normal	0.0598549	1.09897	normal	[RTKL]	--	Biological Process: regulation of protein phosphorylation (GO:0001932);; Molecular Function: protein kinase activity (GO:0004672);; Molecular Function: protein serine/threonine phosphatase activity (GO:0004722);; Molecular Function: ATP binding (GO:0005524);; Cellular Component: plasma membrane (GO:0005886);; Cellular Component: cAMP-dependent protein kinase complex (GO:0005952);; Biological Proc…	--	[T]	Signal transduction mechanisms	Protein phosphatase 2C;; Cyclic nucleotide-binding domain;; Protein kinase domain;; Protein tyrosine kinase	Probable inactive cyclic nucleotide-dependent protein kinase At2g20050 GN=At2g20050/At2g20040 OS=Arabidopsis thaliana (Mouse-ear cress) PE=2 SV=2	T	Signal transduction mechanisms	PREDICTED: protein phosphatase 2C and cyclic nucleotide-binding/kinase domain-containing protein-like isoform X1 [Setaria italica]	biological process: biological regulation (GO:0065007);; biological process: metabolic process (GO:0008152);; biological process: cellular process (GO:0009987);; molecular function: catalytic activity (GO:0003824);; molecular function: binding (GO:0005488);; cellular component: cell (GO:0005623);; cellular component: membrane (GO:0016020);; cellular component: cell part (GO:0044464);; cellular co…	--
BMK_Unigene_095893	AGC_PKA-PKG	PK	0	0.148894	0.148787	0.215496	0	0.137589	0.60326	1.45297	normal	0.650012	1.43022	normal	0.751897	-0.822041	normal	0.973845	-0.107441	normal	[RTKL]	--	Molecular Function: nucleotide binding (GO:0000166);; Molecular Function: protein kinase activity (GO:0004672);; Biological Process: phosphorylation (GO:0016310);; Molecular Function: anion binding (GO:0043168);;	--	[RT]	--	Protein kinase domain;; Protein tyrosine kinase	Serine/threonine-protein kinase AtPK2/AtPK19 GN=F17O14.19 OS=Arabidopsis thaliana (Mouse-ear cress) PE=1 SV=2	T	Signal transduction mechanisms	protein kinase putative [Albugo laibachii Nc14]	molecular function: binding (GO:0005488);; biological process: metabolic process (GO:0008152);; biological process: cellular process (GO:0009987);; molecular function: catalytic activity (GO:0003824)	--
BMK_Unigene_096364	AGC_PKA-PKG	PK	0	0.0841607	0	0	0.424949	0	--	--	--	--	--	--	0.751897	0.955522	normal	--	--	--	[RTKL]	--	Molecular Function: protein serine/threonine kinase activity (GO:0004674);; Molecular Function: ATP binding (GO:0005524);; Biological Process: protein phosphorylation (GO:0006468);; Biological Process: pathogenesis (GO:0009405);; Biological Process: cAMP-mediated signaling (GO:0019933);; Biological Process: entry into host (GO:0044409);;	K04345|5.31847e-37|ppp:PHYPADRAFT_126373|hypothetical protein; K04345 protein kinase A [EC:2.7.11.11] (A)	[T]	Signal transduction mechanisms	Protein kinase domain;; Protein tyrosine kinase	Serine/threonine-protein kinase AtPK2/AtPK19 GN=F17O14.19 OS=Arabidopsis thaliana (Mouse-ear cress) PE=1 SV=2	T	Signal transduction mechanisms	hypothetical protein MYCTH_2304075 [Myceliophthora thermophila ATCC 42464]	biological process: metabolic process (GO:0008152);; biological process: cellular process (GO:0009987);; molecular function: catalytic activity (GO:0003824);; molecular function: binding (GO:0005488);; biological process: multi-organism process (GO:0051704);; biological process: signaling (GO:0023052);; biological process: single-organism process (GO:0044699);; biological process: response to sti…	--
BMK_Unigene_100554	AGC_PKA-PKG	PK	0.187507	0.266607	0	0	0.176749	0	0.884688	0.485409	normal	0.65547	-1.17214	normal	0.751897	0.786137	normal	--	--	--	[RTKL]	--	Molecular Function: protein serine/threonine kinase activity (GO:0004674);; Molecular Function: ATP binding (GO:0005524);; Biological Process: protein phosphorylation (GO:0006468);; Biological Process: intracellular signal transduction (GO:0035556);; Molecular Function: metal ion binding (GO:0046872);;	K04456|3.73751e-30|pxb:103942822|RAC-gamma serine/threonine-protein kinase-like; K04456 RAC serine/threonine-protein kinase [EC:2.7.11.1] (A)	[T]	Signal transduction mechanisms	Protein kinase domain;; Protein tyrosine kinase	Serine/threonine-protein kinase AtPK1/AtPK6 GN=F17O14.20 OS=Arabidopsis thaliana (Mouse-ear cress) PE=1 SV=1	T	Signal transduction mechanisms	predicted protein [Hordeum vulgare subsp. vulgare]	biological process: metabolic process (GO:0008152);; biological process: cellular process (GO:0009987);; molecular function: catalytic activity (GO:0003824);; molecular function: binding (GO:0005488);; biological process: signaling (GO:0023052);; biological process: single-organism process (GO:0044699);; biological process: response to stimulus (GO:0050896);; biological process: biological regula…	--
BMK_Unigene_100971	AGC_PKA-PKG	PK	0	0	0	0	0	0.235024	--	--	--	--	--	--	--	--	--	0.699326	0.884471	normal	[RTKL]	--	Molecular Function: kinase activity (GO:0016301);;	K07359|6.72991e-09|vvi:100251930|serine/threonine-protein kinase GRIK1; K07359 calcium/calmodulin-dependent protein kinase kinase [EC:2.7.11.17] (A)	[R]	General function prediction only	Protein kinase domain	--	T	Signal transduction mechanisms	predicted protein [Hordeum vulgare subsp. vulgare]	biological process: metabolic process (GO:0008152);; biological process: cellular process (GO:0009987);; molecular function: catalytic activity (GO:0003824)	--
BMK_Unigene_000720	AGC_RSK-2	PK	1.91489	2.41589	1.61237	1.77963	2.39026	0.602553	0.530335	0.675845	normal	0.841093	0.263708	normal	0.751897	0.629213	normal	0.456906	-1.08833	normal	[RTKL]	--	Molecular Function: protein serine/threonine kinase activity (GO:0004674);; Molecular Function: ATP binding (GO:0005524);; Cellular Component: nucleus (GO:0005634);; Biological Process: protein phosphorylation (GO:0006468);; Biological Process: regulation of cell size (GO:0008361);; Cellular Component: plastid (GO:0009536);; Biological Process: response to blue light (GO:0009637);; Biological Pro…	--	[R]	General function prediction only	Protein kinase domain;; Protein tyrosine kinase	Protein kinase PINOID GN=PID OS=Oryza sativa subsp. japonica (Rice) PE=2 SV=1	T	Signal transduction mechanisms	hypothetical protein SORBIDRAFT_01g013640 [Sorghum bicolor]	biological process: metabolic process (GO:0008152);; biological process: cellular process (GO:0009987);; molecular function: catalytic activity (GO:0003824);; molecular function: binding (GO:0005488);; cellular component: cell (GO:0005623);; cellular component: organelle (GO:0043226);; cellular component: cell part (GO:0044464);; biological process: single-organism process (GO:0044699);; biologic…	--
BMK_Unigene_004130	AGC_RSK-2	PK	2.63885	1.0711	2.19081	3.58562	4.93551	1.35858	0.493525	-0.894704	normal	0.854353	0.230415	normal	0.751897	0.697803	normal	0.377228	-0.954494	normal	[RTKL]	--	Molecular Function: protein serine/threonine kinase activity (GO:0004674);; Molecular Function: ATP binding (GO:0005524);; Cellular Component: nucleolus (GO:0005730);; Cellular Component: cytoplasm (GO:0005737);; Biological Process: protein phosphorylation (GO:0006468);;	--	[R]	General function prediction only	Protein kinase domain;; Protein tyrosine kinase	Serine/threonine-protein kinase D6PKL2 GN=MCA23.7 OS=Arabidopsis thaliana (Mouse-ear cress) PE=1 SV=1	T	Signal transduction mechanisms	PREDICTED: protein kinase G11A-like isoform X1 [Setaria italica]	biological process: metabolic process (GO:0008152);; biological process: cellular process (GO:0009987);; molecular function: catalytic activity (GO:0003824);; molecular function: binding (GO:0005488);; cellular component: cell (GO:0005623);; cellular component: membrane-enclosed lumen (GO:0031974);; cellular component: organelle (GO:0043226);; cellular component: organelle part (GO:0044422);; cel…	--
BMK_Unigene_005083	AGC_RSK-2	PK	1.78981	0.0465931	0.0243746	0.51239	0.301127	0.367636	0.00260397	-4.15765	down	0.00230885	-4.59551	down	0.904812	-0.39924	normal	0.978107	-0.0725906	normal	[RTKL]	--	Molecular Function: protein serine/threonine kinase activity (GO:0004674);; Molecular Function: ATP binding (GO:0005524);; Biological Process: protein phosphorylation (GO:0006468);;	--	[R]	General function prediction only	Protein kinase domain;; Protein tyrosine kinase	Serine/threonine-protein kinase UCNL {ECO:0000305} OS=Arabidopsis thaliana (Mouse-ear cress) PE=2 SV=1	T	Signal transduction mechanisms	PREDICTED: serine/threonine-protein kinase OXI1-like [Setaria italica]	biological process: metabolic process (GO:0008152);; biological process: cellular process (GO:0009987);; molecular function: catalytic activity (GO:0003824);; molecular function: binding (GO:0005488)	--
BMK_Unigene_005811	AGC_RSK-2	PK	1.82551	0.736671	0.364783	1.75133	1.00854	1.27297	0.512827	-0.902931	normal	0.267511	-1.71132	normal	0.83028	-0.457918	normal	0.973845	-0.0669484	normal	[RTKL]	--	Molecular Function: protein serine/threonine kinase activity (GO:0004674);; Molecular Function: ATP binding (GO:0005524);; Biological Process: protein phosphorylation (GO:0006468);;	--	[R]	General function prediction only	Protein kinase domain;; Protein tyrosine kinase	Serine/threonine-protein kinase UCNL {ECO:0000305} OS=Arabidopsis thaliana (Mouse-ear cress) PE=2 SV=1	--	--	uncharacterized LOC100381917 [Zea mays]	biological process: metabolic process (GO:0008152);; biological process: cellular process (GO:0009987);; molecular function: catalytic activity (GO:0003824);; molecular function: binding (GO:0005488)	--
BMK_Unigene_006649	AGC_RSK-2	PK	4.34258	1.36997	2.21593	2.48049	4.5518	2.0362	0.203343	-1.24044	normal	0.65547	-0.466616	normal	0.225544	1.1019	normal	0.94272	0.0997504	normal	[RTKL]	--	Molecular Function: protein serine/threonine kinase activity (GO:0004674);; Molecular Function: ATP binding (GO:0005524);; Cellular Component: nucleolus (GO:0005730);; Cellular Component: cytoplasm (GO:0005737);; Biological Process: protein phosphorylation (GO:0006468);;	--	[R]	General function prediction only	Protein kinase domain;; Protein tyrosine kinase	Protein kinase G11A GN=OsI_021818 OS=Oryza sativa subsp. indica (Rice) PE=2 SV=1	--	--	PREDICTED: protein kinase G11A-like isoform X1 [Setaria italica]	biological process: metabolic process (GO:0008152);; biological process: cellular process (GO:0009987);; molecular function: catalytic activity (GO:0003824);; molecular function: binding (GO:0005488);; cellular component: cell (GO:0005623);; cellular component: membrane-enclosed lumen (GO:0031974);; cellular component: organelle (GO:0043226);; cellular component: organelle part (GO:0044422);; cel…	--
BMK_Unigene_009537	AGC_RSK-2	PK	2.67818	0.697046	0.492832	1.30416	1.10695	0.578984	0.00881833	-1.68217	down	0.00464588	-1.90256	down	0.985584	-0.0459038	normal	0.340157	-0.859076	normal	[RTKL]	--	Molecular Function: protein serine/threonine kinase activity (GO:0004674);; Molecular Function: ATP binding (GO:0005524);; Cellular Component: nucleolus (GO:0005730);; Biological Process: protein phosphorylation (GO:0006468);; Cellular Component: plastid (GO:0009536);;	--	[R]	General function prediction only	Protein kinase domain;; Protein tyrosine kinase	Protein kinase G11A OS=Oryza sativa subsp. japonica (Rice) PE=2 SV=1	R	General function prediction only	PREDICTED: protein kinase G11A-like isoform X1 [Setaria italica]	biological process: metabolic process (GO:0008152);; biological process: cellular process (GO:0009987);; molecular function: catalytic activity (GO:0003824);; molecular function: binding (GO:0005488);; cellular component: cell (GO:0005623);; cellular component: membrane-enclosed lumen (GO:0031974);; cellular component: organelle (GO:0043226);; cellular component: organelle part (GO:0044422);; cel…	--
BMK_Unigene_014339	AGC_RSK-2	PK	9.73147	3.83419	2.6366	7.03221	4.87679	3.78744	0.55619	-0.927022	normal	0.194312	-1.58374	normal	0.975484	0.100279	normal	0.967354	-0.0993624	normal	[RTKL]	--	Molecular Function: protein serine/threonine kinase activity (GO:0004674);; Molecular Function: ATP binding (GO:0005524);; Cellular Component: nucleolus (GO:0005730);; Cellular Component: cytoplasm (GO:0005737);; Biological Process: protein phosphorylation (GO:0006468);;	--	[R]	General function prediction only	Protein kinase domain;; Protein tyrosine kinase	Serine/threonine-protein kinase D6PKL2 GN=MCA23.7 OS=Arabidopsis thaliana (Mouse-ear cress) PE=1 SV=1	T	Signal transduction mechanisms	PREDICTED: protein kinase G11A-like isoform X1 [Setaria italica]	biological process: metabolic process (GO:0008152);; biological process: cellular process (GO:0009987);; molecular function: catalytic activity (GO:0003824);; molecular function: binding (GO:0005488);; cellular component: cell (GO:0005623);; cellular component: membrane-enclosed lumen (GO:0031974);; cellular component: organelle (GO:0043226);; cellular component: organelle part (GO:0044422);; cel…	--
BMK_Unigene_015218	AGC_RSK-2	PK	4.46507	5.45317	4.06555	3.85257	3.70323	1.46192	0.258689	0.690844	normal	0.650012	0.424085	normal	0.866028	0.235778	normal	0.167399	-1.06933	normal	[RTKL]	--	Molecular Function: protein serine/threonine kinase activity (GO:0004674);; Molecular Function: ATP binding (GO:0005524);; Biological Process: protein phosphorylation (GO:0006468);;	--	[R]	General function prediction only	Protein kinase domain;; Protein tyrosine kinase	Serine/threonine-protein kinase OXI1 GN=At3g25250 OS=Arabidopsis thaliana (Mouse-ear cress) PE=1 SV=1	T	Signal transduction mechanisms	PREDICTED: serine/threonine-protein kinase OXI1-like [Setaria italica]	biological process: metabolic process (GO:0008152);; biological process: cellular process (GO:0009987);; molecular function: catalytic activity (GO:0003824);; molecular function: binding (GO:0005488)	--
BMK_Unigene_015219	AGC_RSK-2	PK	0.663959	0.399759	0.231797	2.86896	1.75028	0.293415	0.814602	-0.411929	normal	0.650012	-0.921452	normal	0.912469	-0.271522	normal	0.000802684	-2.65991	down	[RTKL]	--	Molecular Function: protein serine/threonine kinase activity (GO:0004674);; Molecular Function: protein binding (GO:0005515);; Molecular Function: ATP binding (GO:0005524);; Biological Process: protein phosphorylation (GO:0006468);; Cellular Component: plastid (GO:0009536);; Biological Process: response to abiotic stimulus (GO:0009628);; Biological Process: response to auxin (GO:0009733);; Biolog…	--	[R]	General function prediction only	Protein kinase domain;; Protein tyrosine kinase	Protein kinase PINOID GN=PID OS=Oryza sativa subsp. japonica (Rice) PE=2 SV=1	T	Signal transduction mechanisms	PREDICTED: protein kinase PINOID-like [Setaria italica]	biological process: metabolic process (GO:0008152);; biological process: cellular process (GO:0009987);; molecular function: catalytic activity (GO:0003824);; molecular function: binding (GO:0005488);; cellular component: cell (GO:0005623);; cellular component: organelle (GO:0043226);; cellular component: cell part (GO:0044464);; biological process: response to stimulus (GO:0050896);; biological …	--
BMK_Unigene_016017	AGC_RSK-2	PK	0.202218	1.01885	1.31589	0	0.448756	0.440228	0.028872	2.51468	normal	0.00162451	3.04182	up	0.0159071	3.92582	normal	0.00745169	4.07173	up	[RTKL]	--	Molecular Function: protein serine/threonine kinase activity (GO:0004674);; Molecular Function: ATP binding (GO:0005524);; Cellular Component: plasma membrane (GO:0005886);; Biological Process: protein phosphorylation (GO:0006468);; Biological Process: pollen tube growth (GO:0009860);;	--	[R]	General function prediction only	Protein kinase domain;; Protein tyrosine kinase	Serine/threonine-protein kinase AGC1-7 {ECO:0000305} OS=Arabidopsis thaliana (Mouse-ear cress) PE=1 SV=1	T	Signal transduction mechanisms	hypothetical protein SORBIDRAFT_03g000680 [Sorghum bicolor]	biological process: metabolic process (GO:0008152);; biological process: cellular process (GO:0009987);; molecular function: catalytic activity (GO:0003824);; molecular function: binding (GO:0005488);; cellular component: cell (GO:0005623);; cellular component: membrane (GO:0016020);; cellular component: cell part (GO:0044464);; biological process: reproductive process (GO:0022414);; biological p…	--
BMK_Unigene_020244	AGC_RSK-2	PK	1.47393	1.70645	2.12753	3.28928	1.89842	2.42042	0.60326	0.548032	normal	0.201798	1.20213	normal	0.751897	-0.536213	normal	0.982202	0.0214715	normal	[RTKL]	--	Molecular Function: nucleotide binding (GO:0000166);; Molecular Function: protein kinase activity (GO:0004672);; Biological Process: phosphorylation (GO:0016310);;	--	[R]	General function prediction only	Protein kinase domain;; Protein tyrosine kinase	Protein kinase PINOID GN=PID OS=Oryza sativa subsp. japonica (Rice) PE=2 SV=1	T	Signal transduction mechanisms	hypothetical protein SORBIDRAFT_06g020830 [Sorghum bicolor]	molecular function: binding (GO:0005488);; biological process: metabolic process (GO:0008152);; biological process: cellular process (GO:0009987);; molecular function: catalytic activity (GO:0003824)	--
BMK_Unigene_045977	AGC_RSK-2	PK	1.11177	1.62562	1.09326	0.474012	0.747172	1.77737	0.67711	-0.574038	normal	0.130436	-2.60966	normal	0.751897	-1.27604	normal	0.738702	0.772183	normal	[RTKL]	--	Molecular Function: protein serine/threonine kinase activity (GO:0004674);; Molecular Function: ATP binding (GO:0005524);; Biological Process: protein phosphorylation (GO:0006468);; Biological Process: auxin polar transport (GO:0009926);; Biological Process: root development (GO:0048364);; Biological Process: cotyledon development (GO:0048825);;	--	[R]	General function prediction only	Protein kinase domain;; Protein tyrosine kinase	Serine/threonine-protein kinase WAG2 GN=WAG2 OS=Arabidopsis thaliana (Mouse-ear cress) PE=2 SV=1	--	--	PREDICTED: protein kinase PINOID 2-like [Setaria italica]	biological process: metabolic process (GO:0008152);; biological process: cellular process (GO:0009987);; molecular function: catalytic activity (GO:0003824);; molecular function: binding (GO:0005488);; biological process: single-organism process (GO:0044699);; biological process: localization (GO:0051179);; biological process: biological regulation (GO:0065007);; biological process: multicellular…	--
BMK_Unigene_050215	AGC_RSK-2	PK	2.06469	0.330851	0.87185	1.15975	0.6142	0.588442	0.26233	-1.8538	normal	0.548723	-1.11708	normal	0.911185	0.376864	normal	0.534338	-1.60112	normal	[RTKL]	--	Molecular Function: protein serine/threonine kinase activity (GO:0004674);; Molecular Function: ATP binding (GO:0005524);; Biological Process: protein phosphorylation (GO:0006468);;	--	[R]	General function prediction only	Protein kinase domain;; Protein tyrosine kinase	Serine/threonine-protein kinase KIPK GN=KIPK OS=Arabidopsis thaliana (Mouse-ear cress) PE=1 SV=1	T	Signal transduction mechanisms	PREDICTED: serine/threonine-protein kinase KIPK-like [Setaria italica]	biological process: metabolic process (GO:0008152);; biological process: cellular process (GO:0009987);; molecular function: catalytic activity (GO:0003824);; molecular function: binding (GO:0005488)	--
BMK_Unigene_050979	AGC_RSK-2	PK	7.01719	0.772854	1.42016	3.5975	2.63736	2.00074	0.349553	-2.09565	normal	0.482033	-1.85519	normal	0.832069	-0.62852	normal	0.42541	-1.90904	normal	[RTKL]	--	Molecular Function: protein serine/threonine kinase activity (GO:0004674);; Molecular Function: protein tyrosine kinase activity (GO:0004713);; Molecular Function: ATP binding (GO:0005524);; Cellular Component: nucleus (GO:0005634);; Cellular Component: plasma membrane (GO:0005886);; Biological Process: protein phosphorylation (GO:0006468);; Biological Process: determination of bilateral symmetry…	--	[R]	General function prediction only	Protein kinase domain;; Protein tyrosine kinase	Serine/threonine-protein kinase D6PKL2 GN=MCA23.7 OS=Arabidopsis thaliana (Mouse-ear cress) PE=1 SV=1	--	--	PREDICTED: protein kinase G11A-like [Setaria italica]	biological process: metabolic process (GO:0008152);; biological process: cellular process (GO:0009987);; molecular function: catalytic activity (GO:0003824);; biological process: single-organism process (GO:0044699);; molecular function: binding (GO:0005488);; cellular component: cell (GO:0005623);; cellular component: organelle (GO:0043226);; cellular component: cell part (GO:0044464);; cellular…	--
BMK_Unigene_051186	AGC_RSK-2	PK	24.9101	4.12312	5.87663	24.7011	12.2013	6.72939	0.102492	-1.18287	normal	0.431266	-0.999534	normal	0.933501	-0.140369	normal	0.470198	-0.782371	normal	[RTKL]	--	Molecular Function: protein serine/threonine kinase activity (GO:0004674);; Molecular Function: ATP binding (GO:0005524);; Biological Process: protein phosphorylation (GO:0006468);;	--	[R]	General function prediction only	Protein kinase domain;; Protein tyrosine kinase	Serine/threonine-protein kinase KIPK GN=KIPK OS=Arabidopsis thaliana (Mouse-ear cress) PE=1 SV=1	T	Signal transduction mechanisms	PREDICTED: serine/threonine-protein kinase KIPK-like isoform X1 [Setaria italica]	biological process: metabolic process (GO:0008152);; biological process: cellular process (GO:0009987);; molecular function: catalytic activity (GO:0003824);; molecular function: binding (GO:0005488)	--
BMK_Unigene_052373	AGC_RSK-2	PK	22.9183	19.435	16.8268	20.0709	21.125	13.5552	0.793075	-0.303285	normal	0.735821	0.361433	normal	0.929681	-0.152071	normal	0.569021	-0.660221	normal	[LKJ]	--	Molecular Function: RNA binding (GO:0003723);; Molecular Function: protein serine/threonine kinase activity (GO:0004674);; Molecular Function: ATP binding (GO:0005524);; Cellular Component: nucleolus (GO:0005730);; Cellular Component: cytoplasm (GO:0005737);; Biological Process: protein phosphorylation (GO:0006468);; Molecular Function: ATP-dependent helicase activity (GO:0008026);;	--	[R]	General function prediction only	Protein kinase domain;; Protein tyrosine kinase;; DEAD/DEAH box helicase;; Helicase conserved C-terminal domain	DEAD-box ATP-dependent RNA helicase 52C OS=Oryza sativa subsp. japonica (Rice) PE=3 SV=1	T	Signal transduction mechanisms	PREDICTED: protein kinase G11A-like [Setaria italica]	molecular function: binding (GO:0005488);; biological process: metabolic process (GO:0008152);; biological process: cellular process (GO:0009987);; molecular function: catalytic activity (GO:0003824);; cellular component: cell (GO:0005623);; cellular component: membrane-enclosed lumen (GO:0031974);; cellular component: organelle (GO:0043226);; cellular component: organelle part (GO:0044422);; cel…	--
BMK_Unigene_079333	AGC_RSK-2	PK	1.29778	0.809016	0.0250464	0.697591	0.517448	0.253867	0.306794	-2.59073	normal	0.1893	-3.33555	normal	0.751897	-1.3889	normal	0.699326	-1.05606	normal	[RTKL]	--	Molecular Function: protein serine/threonine kinase activity (GO:0004674);; Molecular Function: ATP binding (GO:0005524);; Biological Process: protein phosphorylation (GO:0006468);; Biological Process: auxin polar transport (GO:0009926);; Biological Process: root development (GO:0048364);; Biological Process: cotyledon development (GO:0048825);;	--	[R]	General function prediction only	Protein kinase domain;; Protein tyrosine kinase	Serine/threonine-protein kinase WAG2 GN=WAG2 OS=Arabidopsis thaliana (Mouse-ear cress) PE=2 SV=1	T	Signal transduction mechanisms	PREDICTED: protein kinase PINOID 2-like [Setaria italica]	biological process: metabolic process (GO:0008152);; biological process: cellular process (GO:0009987);; molecular function: catalytic activity (GO:0003824);; molecular function: binding (GO:0005488);; biological process: single-organism process (GO:0044699);; biological process: localization (GO:0051179);; biological process: biological regulation (GO:0065007);; biological process: multicellular…	--
BMK_Unigene_079334	AGC_RSK-2	PK	0.591444	0.134617	0.217088	0.29484	0.432406	0	0.60326	-1.41126	normal	0.782391	-0.716589	normal	0.852519	0.580164	normal	0.609293	-1.45125	normal	[RTKL]	--	Molecular Function: protein serine/threonine kinase activity (GO:0004674);; Molecular Function: ATP binding (GO:0005524);; Biological Process: protein phosphorylation (GO:0006468);; Biological Process: auxin polar transport (GO:0009926);; Biological Process: root development (GO:0048364);; Biological Process: cotyledon development (GO:0048825);;	--	[R]	General function prediction only	Protein kinase domain;; Protein tyrosine kinase	Serine/threonine-protein kinase WAG1 GN=F22G10.21 OS=Arabidopsis thaliana (Mouse-ear cress) PE=2 SV=1	T	Signal transduction mechanisms	Os03g0253200 [Oryza sativa Japonica Group]	biological process: metabolic process (GO:0008152);; biological process: cellular process (GO:0009987);; molecular function: catalytic activity (GO:0003824);; molecular function: binding (GO:0005488);; biological process: single-organism process (GO:0044699);; biological process: localization (GO:0051179);; biological process: biological regulation (GO:0065007);; biological process: multicellular…	--
BMK_Unigene_083154	AGC_RSK-2	PK	0.739987	0	0.24699	0.478459	0.156503	0.152075	0.359708	-2.63048	normal	0.822524	-0.724933	normal	0.871964	-0.551022	normal	0.850187	-0.541203	normal	[RTKL]	--	Molecular Function: protein serine/threonine kinase activity (GO:0004674);; Molecular Function: ATP binding (GO:0005524);; Biological Process: protein phosphorylation (GO:0006468);;	--	[R]	General function prediction only	Protein kinase domain;; Protein tyrosine kinase	Serine/threonine-protein kinase UCNL {ECO:0000305} OS=Arabidopsis thaliana (Mouse-ear cress) PE=2 SV=1	T	Signal transduction mechanisms	uncharacterized LOC100381917 [Zea mays]	biological process: metabolic process (GO:0008152);; biological process: cellular process (GO:0009987);; molecular function: catalytic activity (GO:0003824);; molecular function: binding (GO:0005488)	--
BMK_Unigene_088143	AGC_RSK-2	PK	1.66006	0.302255	0.852055	1.20478	0.483345	0.575354	0.664484	-1.17062	normal	0.650012	1.21408	normal	0.783771	-0.738413	normal	0.30998	-2.26736	normal	[RTKL]	--	Molecular Function: protein serine/threonine kinase activity (GO:0004674);; Molecular Function: ATP binding (GO:0005524);; Biological Process: protein phosphorylation (GO:0006468);;	--	[R]	General function prediction only	Protein kinase domain;; Protein tyrosine kinase	Serine/threonine-protein kinase KIPK GN=KIPK OS=Arabidopsis thaliana (Mouse-ear cress) PE=1 SV=1	T	Signal transduction mechanisms	PREDICTED: serine/threonine-protein kinase KIPK-like [Setaria italica]	biological process: metabolic process (GO:0008152);; biological process: cellular process (GO:0009987);; molecular function: catalytic activity (GO:0003824);; molecular function: binding (GO:0005488)	--
BMK_Unigene_088223	AGC_RSK-2	PK	25.9177	3.89286	6.01478	26.6318	12.9099	7.52931	0.000269419	-2.55779	down	0.214362	-1.1579	normal	0.751897	-0.450711	normal	0.683704	-0.515039	normal	[RTKL]	--	Molecular Function: protein serine/threonine kinase activity (GO:0004674);; Molecular Function: ATP binding (GO:0005524);; Biological Process: protein phosphorylation (GO:0006468);;	--	[R]	General function prediction only	Protein kinase domain;; Protein tyrosine kinase	Serine/threonine-protein kinase KIPK GN=KIPK OS=Arabidopsis thaliana (Mouse-ear cress) PE=1 SV=1	T	Signal transduction mechanisms	PREDICTED: serine/threonine-protein kinase KIPK-like isoform X1 [Setaria italica]	biological process: metabolic process (GO:0008152);; biological process: cellular process (GO:0009987);; molecular function: catalytic activity (GO:0003824);; molecular function: binding (GO:0005488)	--
BMK_Unigene_089498	AGC_RSK-2	PK	0.474905	2.87357	3.09855	0.525231	1.50095	4.75552	--	--	--	--	--	--	0.751897	0.797908	normal	0.699326	1.01727	normal	--	--	Molecular Function: protein serine/threonine kinase activity (GO:0004674);; Molecular Function: ATP binding (GO:0005524);; Biological Process: protein phosphorylation (GO:0006468);;	--	[R]	General function prediction only	Protein kinase domain	Serine/threonine-protein kinase OXI1 GN=At3g25250 OS=Arabidopsis thaliana (Mouse-ear cress) PE=1 SV=1	T	Signal transduction mechanisms	PREDICTED: serine/threonine-protein kinase OXI1-like [Zea mays]	biological process: metabolic process (GO:0008152);; biological process: cellular process (GO:0009987);; molecular function: catalytic activity (GO:0003824);; molecular function: binding (GO:0005488)	--
BMK_Unigene_091103	AGC_RSK-2	PK	12.943	5.62182	3.52201	10.7534	6.91266	5.2296	0.60326	-0.477386	normal	0.0542453	-1.31076	normal	0.751897	-0.527767	normal	0.103215	-0.877552	normal	[RTKL]	--	Molecular Function: protein serine/threonine kinase activity (GO:0004674);; Molecular Function: ATP binding (GO:0005524);; Cellular Component: nucleolus (GO:0005730);; Cellular Component: cytoplasm (GO:0005737);; Biological Process: protein phosphorylation (GO:0006468);;	--	[R]	General function prediction only	Protein kinase domain;; Protein tyrosine kinase	Serine/threonine-protein kinase D6PKL2 GN=MCA23.7 OS=Arabidopsis thaliana (Mouse-ear cress) PE=1 SV=1	T	Signal transduction mechanisms	PREDICTED: protein kinase G11A-like isoform X1 [Setaria italica]	biological process: metabolic process (GO:0008152);; biological process: cellular process (GO:0009987);; molecular function: catalytic activity (GO:0003824);; molecular function: binding (GO:0005488);; cellular component: cell (GO:0005623);; cellular component: membrane-enclosed lumen (GO:0031974);; cellular component: organelle (GO:0043226);; cellular component: organelle part (GO:0044422);; cel…	--
BMK_Unigene_091339	AGC_RSK-2	PK	22.5824	16.7771	17.3584	24.8374	21.3961	19.3072	0.947979	0.106652	normal	0.94711	-0.123622	normal	0.751897	-0.472036	normal	0.526612	-0.761318	normal	[RTKL]	--	Molecular Function: protein serine/threonine kinase activity (GO:0004674);; Molecular Function: ATP binding (GO:0005524);; Cellular Component: nucleolus (GO:0005730);; Cellular Component: cytoplasm (GO:0005737);; Biological Process: protein phosphorylation (GO:0006468);;	--	[R]	General function prediction only	Protein kinase domain;; Protein tyrosine kinase	Serine/threonine-protein kinase D6PKL2 GN=MCA23.7 OS=Arabidopsis thaliana (Mouse-ear cress) PE=1 SV=1	T	Signal transduction mechanisms	PREDICTED: protein kinase G11A-like [Setaria italica]	biological process: metabolic process (GO:0008152);; biological process: cellular process (GO:0009987);; molecular function: catalytic activity (GO:0003824);; molecular function: binding (GO:0005488);; cellular component: cell (GO:0005623);; cellular component: membrane-enclosed lumen (GO:0031974);; cellular component: organelle (GO:0043226);; cellular component: organelle part (GO:0044422);; cel…	--
BMK_Unigene_091901	AGC_RSK-2	PK	10.7886	0.948342	2.08465	5.48455	4.05629	2.84405	1.02903e-06	-6.00234	down	0.0231034	-2.09819	normal	0.929122	-0.21079	normal	0.0757891	-1.59221	normal	[RTKL]	--	Molecular Function: protein serine/threonine kinase activity (GO:0004674);; Molecular Function: protein tyrosine kinase activity (GO:0004713);; Molecular Function: ATP binding (GO:0005524);; Cellular Component: nucleus (GO:0005634);; Cellular Component: plasma membrane (GO:0005886);; Biological Process: protein phosphorylation (GO:0006468);; Biological Process: determination of bilateral symmetry…	--	[R]	General function prediction only	Protein kinase domain;; Protein tyrosine kinase	Serine/threonine-protein kinase D6PKL2 GN=MCA23.7 OS=Arabidopsis thaliana (Mouse-ear cress) PE=1 SV=1	T	Signal transduction mechanisms	PREDICTED: protein kinase G11A-like [Setaria italica]	biological process: metabolic process (GO:0008152);; biological process: cellular process (GO:0009987);; molecular function: catalytic activity (GO:0003824);; biological process: single-organism process (GO:0044699);; molecular function: binding (GO:0005488);; cellular component: cell (GO:0005623);; cellular component: organelle (GO:0043226);; cellular component: cell part (GO:0044464);; cellular…	--
BMK_Unigene_106178	AGC_RSK-2	PK	0.928337	0	0	0.0658458	0.203285	0.13261	0.16405	-3.38889	normal	0.215913	-3.20235	normal	0.889399	0.441706	normal	0.87869	0.431641	normal	[RTKL]	--	Molecular Function: protein serine/threonine kinase activity (GO:0004674);; Molecular Function: ATP binding (GO:0005524);; Cellular Component: nucleolus (GO:0005730);; Biological Process: protein phosphorylation (GO:0006468);; Cellular Component: plastid (GO:0009536);;	--	[R]	General function prediction only	Protein kinase domain;; Protein tyrosine kinase	Protein kinase G11A GN=OsI_021818 OS=Oryza sativa subsp. indica (Rice) PE=2 SV=1	T	Signal transduction mechanisms	PREDICTED: protein kinase G11A-like [Setaria italica]	biological process: metabolic process (GO:0008152);; biological process: cellular process (GO:0009987);; molecular function: catalytic activity (GO:0003824);; molecular function: binding (GO:0005488);; cellular component: cell (GO:0005623);; cellular component: membrane-enclosed lumen (GO:0031974);; cellular component: organelle (GO:0043226);; cellular component: organelle part (GO:0044422);; cel…	--
BMK_Unigene_020497	AGC-Pl	PK	36.1405	55.8696	66.8991	29.642	53.3596	52.2074	0.00872389	0.997515	normal	0.000144764	1.40055	up	0.106776	1.08235	normal	0.00485358	1.16015	up	[RTKL]	--	Molecular Function: protein serine/threonine kinase activity (GO:0004674);; Molecular Function: ATP binding (GO:0005524);; Cellular Component: nucleus (GO:0005634);; Cellular Component: ribosome (GO:0005840);; Biological Process: protein phosphorylation (GO:0006468);; Biological Process: response to heat (GO:0009408);; Biological Process: response to cold (GO:0009409);; Biological Process: respon…	K04688|0|sita:101762974|serine/threonine-protein kinase AtPK2/AtPK19-like; K04688 p70 ribosomal S6 kinase [EC:2.7.11.1] (A)	[RT]	--	Protein kinase domain;; Protein tyrosine kinase;; Kinase-like;; Protein kinase C terminal domain;; Lipopolysaccharide kinase (Kdo/WaaP) family	Serine/threonine-protein kinase AtPK2/AtPK19 GN=F17O14.19 OS=Arabidopsis thaliana (Mouse-ear cress) PE=1 SV=2	T	Signal transduction mechanisms	PREDICTED: serine/threonine-protein kinase AtPK2/AtPK19-like [Setaria italica]	biological process: metabolic process (GO:0008152);; biological process: cellular process (GO:0009987);; molecular function: catalytic activity (GO:0003824);; molecular function: binding (GO:0005488);; cellular component: cell (GO:0005623);; cellular component: organelle (GO:0043226);; cellular component: cell part (GO:0044464);; cellular component: macromolecular complex (GO:0032991);; biologica…	--
BMK_Unigene_028231	AGC-Pl	PK	0.1772	0.566916	0.261088	0.415778	0.246432	0.161629	0.60326	1.52887	normal	0.824717	0.71862	normal	0.959041	-0.247264	normal	0.826215	-0.599652	normal	[RTKL]	--	Molecular Function: nucleotide binding (GO:0000166);; Molecular Function: protein kinase activity (GO:0004672);; Biological Process: phosphorylation (GO:0016310);; Molecular Function: anion binding (GO:0043168);;	K13303|7.58171e-37|gsl:Gasu_13570|serine/threonine protein kinase (EC:2.7.11.1); K13303 serum/glucocorticoid-regulated kinase 2 [EC:2.7.11.1] (A)	[RT]	--	Protein kinase domain;; Protein tyrosine kinase	Serine/threonine-protein kinase AtPK2/AtPK19 GN=F17O14.19 OS=Arabidopsis thaliana (Mouse-ear cress) PE=1 SV=2	T	Signal transduction mechanisms	Similar to Serine/threonine-protein kinase gad8; acc. no. Q9P7J8 [Pyronema omphalodes CBS 100304]	molecular function: binding (GO:0005488);; biological process: metabolic process (GO:0008152);; biological process: cellular process (GO:0009987);; molecular function: catalytic activity (GO:0003824)	--
BMK_Unigene_032081	AGC-Pl	PK	0.339323	0	0	0.162584	0.247591	0	0.60326	-1.5391	normal	0.650012	-1.41805	normal	0.935768	0.326968	normal	0.699326	-0.785182	normal	[RTKL]	--	Molecular Function: protein serine/threonine kinase activity (GO:0004674);; Molecular Function: ATP binding (GO:0005524);; Biological Process: protein phosphorylation (GO:0006468);;	K04688|2.08534e-28|ota:Ot07g02590|putative ribosomal-protein S6 kinase (ISS); K04688 p70 ribosomal S6 kinase [EC:2.7.11.1] (A)	[RT]	--	Protein kinase domain;; Protein tyrosine kinase	Serine/threonine-protein kinase AtPK2/AtPK19 GN=F17O14.19 OS=Arabidopsis thaliana (Mouse-ear cress) PE=1 SV=2	T	Signal transduction mechanisms	hypothetical protein LEMA_P076300.1 [Leptosphaeria maculans JN3]	biological process: metabolic process (GO:0008152);; biological process: cellular process (GO:0009987);; molecular function: catalytic activity (GO:0003824);; molecular function: binding (GO:0005488)	--
BMK_Unigene_037451	AGC-Pl	PK	1.70416	2.69145	0.727148	0	0	0	0.407077	0.980927	normal	0.658504	-0.691573	normal	--	--	--	--	--	--	[RTKL]	--	Molecular Function: protein serine/threonine kinase activity (GO:0004674);; Molecular Function: ATP binding (GO:0005524);; Molecular Function: phospholipid binding (GO:0005543);; Biological Process: protein phosphorylation (GO:0006468);; Molecular Function: transferase activity, transferring acyl groups (GO:0016746);;	--	[RT]	--	Protein kinase domain;; Protein tyrosine kinase;; Ankyrin repeats (3 copies);; Ankyrin repeats (many copies);; Ankyrin repeat;; Ankyrin repeats (many copies);; Ankyrin repeat	Serine/threonine-protein kinase AtPK2/AtPK19 GN=F17O14.19 OS=Arabidopsis thaliana (Mouse-ear cress) PE=1 SV=2	T	Signal transduction mechanisms	AGC/RSK/RSK-UNCLASSIFIED protein kinase [Phytophthora parasitica]	biological process: metabolic process (GO:0008152);; biological process: cellular process (GO:0009987);; molecular function: catalytic activity (GO:0003824);; molecular function: binding (GO:0005488)	--
BMK_Unigene_038420	AGC-Pl	PK	0.876022	0	0	0.383155	0.612887	0.10753	0.115047	-3.64535	normal	0.155238	-3.45822	normal	0.865099	0.57325	normal	0.767637	-0.757032	normal	[RTKL]	--	Molecular Function: protein serine/threonine kinase activity (GO:0004674);; Molecular Function: ATP binding (GO:0005524);; Cellular Component: ribosome (GO:0005840);; Biological Process: protein phosphorylation (GO:0006468);;	K04688|2.69088e-40|cit:102608538|serine/threonine-protein kinase AtPK2/AtPK19-like; K04688 p70 ribosomal S6 kinase [EC:2.7.11.1] (A)	[RT]	--	Protein kinase domain	Serine/threonine-protein kinase AtPK2/AtPK19 GN=F17O14.19 OS=Arabidopsis thaliana (Mouse-ear cress) PE=1 SV=2	T	Signal transduction mechanisms	hypothetical protein SNOG_08341 [Phaeosphaeria nodorum SN15]	biological process: metabolic process (GO:0008152);; biological process: cellular process (GO:0009987);; molecular function: catalytic activity (GO:0003824);; molecular function: binding (GO:0005488);; cellular component: cell (GO:0005623);; cellular component: macromolecular complex (GO:0032991);; cellular component: organelle (GO:0043226);; cellular component: cell part (GO:0044464)	--
BMK_Unigene_038426	AGC-Pl	PK	0.312917	0	0	0.299939	0	0	0.60326	-1.62009	normal	0.650012	-1.47711	normal	0.751897	-1.25809	normal	0.670606	-1.28509	normal	[RTKL]	--	Molecular Function: protein kinase C activity (GO:0004697);; Molecular Function: ATP binding (GO:0005524);; Cellular Component: ribosome (GO:0005840);; Biological Process: protein phosphorylation (GO:0006468);;	--	[RT]	--	Protein kinase domain;; Protein tyrosine kinase	Serine/threonine-protein kinase AtPK2/AtPK19 GN=F17O14.19 OS=Arabidopsis thaliana (Mouse-ear cress) PE=1 SV=2	T	Signal transduction mechanisms	hypothetical protein SNOG_08341 [Phaeosphaeria nodorum SN15]	biological process: metabolic process (GO:0008152);; biological process: cellular process (GO:0009987);; molecular function: catalytic activity (GO:0003824);; molecular function: binding (GO:0005488);; cellular component: cell (GO:0005623);; cellular component: macromolecular complex (GO:0032991);; cellular component: organelle (GO:0043226);; cellular component: cell part (GO:0044464)	--
BMK_Unigene_041105	AGC-Pl	PK	21.0103	18.3627	14.8289	15.4625	23.6983	14.7316	0.865768	-0.183481	normal	0.726125	-0.36255	normal	0.237775	1.00877	normal	0.699326	0.455526	normal	[RTKL]	--	Molecular Function: protein serine/threonine kinase activity (GO:0004674);; Molecular Function: ATP binding (GO:0005524);; Cellular Component: nucleus (GO:0005634);; Cellular Component: ribosome (GO:0005840);; Biological Process: protein phosphorylation (GO:0006468);; Biological Process: response to heat (GO:0009408);; Biological Process: response to cold (GO:0009409);; Biological Process: respon…	K04688|0|sita:101753601|serine/threonine-protein kinase AtPK2/AtPK19-like; K04688 p70 ribosomal S6 kinase [EC:2.7.11.1] (A)	[RT]	--	Protein kinase domain;; Protein tyrosine kinase;; Kinase-like;; Lipopolysaccharide kinase (Kdo/WaaP) family;; Protein kinase C terminal domain	Serine/threonine-protein kinase AtPK2/AtPK19 GN=F17O14.19 OS=Arabidopsis thaliana (Mouse-ear cress) PE=1 SV=2	T	Signal transduction mechanisms	PREDICTED: serine/threonine-protein kinase AtPK2/AtPK19-like [Setaria italica]	biological process: metabolic process (GO:0008152);; biological process: cellular process (GO:0009987);; molecular function: catalytic activity (GO:0003824);; molecular function: binding (GO:0005488);; cellular component: cell (GO:0005623);; cellular component: organelle (GO:0043226);; cellular component: cell part (GO:0044464);; cellular component: macromolecular complex (GO:0032991);; biologica…	--
BMK_Unigene_062835	AGC-Pl	PK	0	0	0	0.0951957	0	0	--	--	--	--	--	--	--	--	--	--	--	--	[RTKL]	--	Molecular Function: protein serine/threonine kinase activity (GO:0004674);; Molecular Function: ATP binding (GO:0005524);; Molecular Function: phospholipid binding (GO:0005543);; Biological Process: protein phosphorylation (GO:0006468);; Molecular Function: transferase activity, transferring acyl groups (GO:0016746);;	--	[RT]	--	Protein kinase domain;; Protein tyrosine kinase	Serine/threonine-protein kinase AtPK2/AtPK19 GN=F17O14.19 OS=Arabidopsis thaliana (Mouse-ear cress) PE=1 SV=2	T	Signal transduction mechanisms	protein kinase putative [Albugo laibachii Nc14]	biological process: metabolic process (GO:0008152);; biological process: cellular process (GO:0009987);; molecular function: catalytic activity (GO:0003824);; molecular function: binding (GO:0005488)	--
BMK_Unigene_063118	AGC-Pl	PK	0	0.0962747	0	0.681647	0	0	--	--	--	--	--	--	0.751897	-0.941648	normal	0.699326	-1.1472	normal	[RTKL]	--	Molecular Function: protein serine/threonine kinase activity (GO:0004674);; Molecular Function: ATP binding (GO:0005524);; Biological Process: protein phosphorylation (GO:0006468);; Biological Process: cell communication (GO:0007154);; Molecular Function: phosphatidylinositol binding (GO:0035091);;	--	[RT]	--	Protein kinase domain;; Protein tyrosine kinase	Serine/threonine-protein kinase AtPK1/AtPK6 GN=F17O14.20 OS=Arabidopsis thaliana (Mouse-ear cress) PE=1 SV=1	T	Signal transduction mechanisms	hypothetical protein PHYSODRAFT_284310 [Phytophthora sojae]	biological process: metabolic process (GO:0008152);; biological process: cellular process (GO:0009987);; molecular function: catalytic activity (GO:0003824);; molecular function: binding (GO:0005488);; biological process: single-organism process (GO:0044699)	--
BMK_Unigene_084785	AGC-Pl	PK	26.0619	22.2555	19.4103	18.9254	29.4411	18.0182	0.719131	-0.31176	normal	0.286566	-0.997564	normal	0.492505	0.858854	normal	0.888048	0.185382	normal	[RTKL]	--	Molecular Function: protein serine/threonine kinase activity (GO:0004674);; Molecular Function: ATP binding (GO:0005524);; Cellular Component: nucleus (GO:0005634);; Cellular Component: ribosome (GO:0005840);; Biological Process: protein phosphorylation (GO:0006468);; Biological Process: response to heat (GO:0009408);; Biological Process: response to cold (GO:0009409);; Biological Process: respon…	K04688|7.22781e-174|sita:101753601|serine/threonine-protein kinase AtPK2/AtPK19-like; K04688 p70 ribosomal S6 kinase [EC:2.7.11.1] (A)	[RT]	--	Protein kinase domain;; Protein tyrosine kinase;; Kinase-like;; Lipopolysaccharide kinase (Kdo/WaaP) family	Serine/threonine-protein kinase AtPK2/AtPK19 GN=F17O14.19 OS=Arabidopsis thaliana (Mouse-ear cress) PE=1 SV=2	--	--	PREDICTED: serine/threonine-protein kinase AtPK2/AtPK19-like [Setaria italica]	biological process: metabolic process (GO:0008152);; biological process: cellular process (GO:0009987);; molecular function: catalytic activity (GO:0003824);; molecular function: binding (GO:0005488);; cellular component: cell (GO:0005623);; cellular component: organelle (GO:0043226);; cellular component: cell part (GO:0044464);; cellular component: macromolecular complex (GO:0032991);; biologica…	--
BMK_Unigene_103124	AGC-Pl	PK	0	0.146826	0.146238	0	0	0.0671039	0.60326	1.45508	normal	0.650012	1.40591	normal	--	--	--	--	--	--	[RTKL]	--	Biological Process: cellular process (GO:0009987);; Molecular Function: kinase activity (GO:0016301);;	K13303|2.19152e-32|gsl:Gasu_13570|serine/threonine protein kinase (EC:2.7.11.1); K13303 serum/glucocorticoid-regulated kinase 2 [EC:2.7.11.1] (A)	[T]	Signal transduction mechanisms	Protein kinase domain;; Protein tyrosine kinase	Serine/threonine-protein kinase AtPK1/AtPK6 GN=F17O14.20 OS=Arabidopsis thaliana (Mouse-ear cress) PE=1 SV=1	T	Signal transduction mechanisms	G protein-coupled receptor kinase G protein-coupled receptor kinase 2 [Ectocarpus siliculosus]	biological process: cellular process (GO:0009987);; biological process: metabolic process (GO:0008152);; molecular function: catalytic activity (GO:0003824)	--
BMK_Unigene_103306	AGC-Pl	PK	0	0	0	0.244836	0	0	--	--	--	--	--	--	0.751897	-0.722927	normal	0.699326	-0.78243	normal	[RTKL]	--	Molecular Function: protein serine/threonine kinase activity (GO:0004674);; Molecular Function: ATP binding (GO:0005524);; Biological Process: protein phosphorylation (GO:0006468);; Biological Process: cell communication (GO:0007154);; Molecular Function: phosphatidylinositol binding (GO:0035091);;	K13303|1.65877e-17|cme:CYME_CMR193C|similar to ribosomal protein S6 kinase; K13303 serum/glucocorticoid-regulated kinase 2 [EC:2.7.11.1] (A)	[T]	Signal transduction mechanisms	Protein kinase domain	Serine/threonine-protein kinase AtPK2/AtPK19 GN=F17O14.19 OS=Arabidopsis thaliana (Mouse-ear cress) PE=1 SV=2	T	Signal transduction mechanisms	AGC protein kinase [Aphanomyces invadans]	biological process: metabolic process (GO:0008152);; biological process: cellular process (GO:0009987);; molecular function: catalytic activity (GO:0003824);; molecular function: binding (GO:0005488);; biological process: single-organism process (GO:0044699)	--
BMK_Unigene_103613	AGC-Pl	PK	0	0	0	0	0	0.197647	--	--	--	--	--	--	--	--	--	0.699326	0.883547	normal	[RTKL]	--	Molecular Function: protein serine/threonine kinase activity (GO:0004674);; Molecular Function: ATP binding (GO:0005524);; Biological Process: protein phosphorylation (GO:0006468);;	K04688|5.82123e-29|cit:102608538|serine/threonine-protein kinase AtPK2/AtPK19-like; K04688 p70 ribosomal S6 kinase [EC:2.7.11.1] (A)	[RT]	--	Protein kinase domain;; Protein tyrosine kinase	Serine/threonine-protein kinase AtPK2/AtPK19 GN=F17O14.19 OS=Arabidopsis thaliana (Mouse-ear cress) PE=1 SV=2	T	Signal transduction mechanisms	hypothetical protein FAVG1_01929 [Fusarium avenaceum]	biological process: metabolic process (GO:0008152);; biological process: cellular process (GO:0009987);; molecular function: catalytic activity (GO:0003824);; molecular function: binding (GO:0005488)	--
BMK_Unigene_105411	AGC-Pl	PK	0	0	0	0.126019	0	0	--	--	--	--	--	--	--	--	--	--	--	--	[RTKL]	--	Molecular Function: motor activity (GO:0003774);; Molecular Function: protein serine/threonine kinase activity (GO:0004674);; Molecular Function: ATP binding (GO:0005524);; Biological Process: protein phosphorylation (GO:0006468);; Biological Process: cell communication (GO:0007154);; Cellular Component: myosin complex (GO:0016459);; Molecular Function: phosphatidylinositol binding (GO:0035091);;	K13303|2.73923e-22|gsl:Gasu_13570|serine/threonine protein kinase (EC:2.7.11.1); K13303 serum/glucocorticoid-regulated kinase 2 [EC:2.7.11.1] (A)	[RT]	--	Protein kinase domain;; Protein tyrosine kinase	Serine/threonine-protein kinase AtPK1/AtPK6 GN=F17O14.20 OS=Arabidopsis thaliana (Mouse-ear cress) PE=1 SV=1	T	Signal transduction mechanisms	predicted protein [Hordeum vulgare subsp. vulgare]	biological process: metabolic process (GO:0008152);; molecular function: catalytic activity (GO:0003824);; biological process: cellular process (GO:0009987);; molecular function: binding (GO:0005488);; biological process: single-organism process (GO:0044699);; cellular component: cell (GO:0005623);; cellular component: macromolecular complex (GO:0032991);; cellular component: organelle (GO:004322…	--
BMK_Unigene_106827	AGC-Pl	PK	0	0	0	0	0	0	--	--	--	--	--	--	--	--	--	--	--	--	[RTKL]	--	Molecular Function: protein serine/threonine kinase activity (GO:0004674);; Molecular Function: ATP binding (GO:0005524);; Biological Process: protein phosphorylation (GO:0006468);;	K04688|1.03248e-22|zma:100273759|uncharacterized LOC100273759; K04688 p70 ribosomal S6 kinase [EC:2.7.11.1] (A)	[RT]	--	Protein kinase domain;; Protein tyrosine kinase	Serine/threonine-protein kinase AtPK2/AtPK19 GN=F17O14.19 OS=Arabidopsis thaliana (Mouse-ear cress) PE=1 SV=2	T	Signal transduction mechanisms	AGC/YANK protein kinase [Fusarium oxysporum FOSC 3-a]	biological process: metabolic process (GO:0008152);; biological process: cellular process (GO:0009987);; molecular function: catalytic activity (GO:0003824);; molecular function: binding (GO:0005488)	--
BMK_Unigene_064267	Aur	PK	0	0	0	0	0	0	--	--	--	--	--	--	--	--	--	--	--	--	[RTKL]	--	Molecular Function: protein serine/threonine kinase activity (GO:0004674);; Molecular Function: ATP binding (GO:0005524);; Biological Process: protein phosphorylation (GO:0006468);;	K08850|3.01548e-27|csl:COCSUDRAFT_46601|Pkinase-domain-containing protein; K08850 aurora kinase, other [EC:2.7.11.1] (A)	[D]	Cell cycle control, cell division, chromosome partitioning	Protein kinase domain;; Protein tyrosine kinase	Serine/threonine-protein kinase Aurora-1 GN=AUR1 OS=Arabidopsis thaliana (Mouse-ear cress) PE=1 SV=1	T	Signal transduction mechanisms	hypothetical protein SNOG_12634 [Phaeosphaeria nodorum SN15]	biological process: metabolic process (GO:0008152);; biological process: cellular process (GO:0009987);; molecular function: catalytic activity (GO:0003824);; molecular function: binding (GO:0005488)	--
BMK_Unigene_086637	Aur	PK	4.12457	3.9294	2.11074	1.30735	0.969847	0.688313	0.766486	0.445993	normal	0.930759	0.179358	normal	0.484208	1.47827	normal	0.909363	0.296447	normal	[RTKL]	--	Molecular Function: ATP binding (GO:0005524);; Cellular Component: nucleolus (GO:0005730);; Cellular Component: spindle (GO:0005819);; Molecular Function: histone kinase activity (H3-S10 specific) (GO:0035175);; Biological Process: histone H3-S10 phosphorylation (GO:0043987);;	K08850|6.40216e-163|sita:101757314|serine/threonine-protein kinase Aurora-1-like; K08850 aurora kinase, other [EC:2.7.11.1] (A)	[D]	Cell cycle control, cell division, chromosome partitioning	Protein kinase domain;; Protein tyrosine kinase	Serine/threonine-protein kinase Aurora-1 GN=AUR1 OS=Arabidopsis thaliana (Mouse-ear cress) PE=1 SV=1	--	--	PREDICTED: serine/threonine-protein kinase Aurora-1-like [Setaria italica]	molecular function: binding (GO:0005488);; cellular component: cell (GO:0005623);; cellular component: membrane-enclosed lumen (GO:0031974);; cellular component: organelle (GO:0043226);; cellular component: organelle part (GO:0044422);; cellular component: cell part (GO:0044464);; biological process: metabolic process (GO:0008152);; biological process: cellular process (GO:0009987);; biological p…	--
BMK_Unigene_058013	AurL-Cr-1	PK	0.480162	0	0	0	0.195347	0.125949	0.450698	-2.30903	normal	0.532236	-2.11884	normal	0.751897	0.934459	normal	0.699326	0.884471	normal	[RTKL]	--	Molecular Function: protein serine/threonine kinase activity (GO:0004674);; Molecular Function: ATP binding (GO:0005524);; Biological Process: protein phosphorylation (GO:0006468);;	--	[R]	General function prediction only	Protein kinase domain;; Protein tyrosine kinase	CBL-interacting serine/threonine-protein kinase 11 GN=At2g30360 OS=Arabidopsis thaliana (Mouse-ear cress) PE=1 SV=1	T	Signal transduction mechanisms	hypothetical protein SNOG_12993 [Phaeosphaeria nodorum SN15]	biological process: metabolic process (GO:0008152);; biological process: cellular process (GO:0009987);; molecular function: catalytic activity (GO:0003824);; molecular function: binding (GO:0005488)	--
BMK_Unigene_073023	AurL-Cr-1	PK	0	0	0	0	0.687378	2.98624	--	--	--	--	--	--	0.0602096	3.49211	normal	1.31752e-09	6.67942	up	--	--	Molecular Function: transferase activity, transferring phosphorus-containing groups (GO:0016772);;	--	--	--	Protein kinase domain	--	T	Signal transduction mechanisms	hypothetical protein SNOG_09310 [Phaeosphaeria nodorum SN15]	biological process: metabolic process (GO:0008152);; molecular function: catalytic activity (GO:0003824)	--
BMK_Unigene_003192	BUB	PK	1.70114	1.43569	1.38303	1.88264	2.80314	1.44281	0.728881	0.76033	normal	0.893338	0.433018	normal	0.989392	0.0487745	normal	0.699326	-1.10144	normal	[RTKL]	--	Molecular Function: protein serine/threonine kinase activity (GO:0004674);; Molecular Function: ATP binding (GO:0005524);; Biological Process: protein phosphorylation (GO:0006468);;	K02178|0|sita:101772623|checkpoint serine/threonine-protein kinase BUB1-like; K02178 checkpoint serine/threonine-protein kinase [EC:2.7.11.1] (A)	[D]	Cell cycle control, cell division, chromosome partitioning	Protein kinase domain;; Mad3/BUB1 homology region 1;; Protein tyrosine kinase	Mitotic checkpoint serine/threonine-protein kinase BUB1 GN=BUB1 OS=Arabidopsis thaliana (Mouse-ear cress) PE=1 SV=1	D	Cell cycle control, cell division, chromosome partitioning	PREDICTED: checkpoint serine/threonine-protein kinase BUB1-like [Setaria italica]	biological process: metabolic process (GO:0008152);; biological process: cellular process (GO:0009987);; molecular function: catalytic activity (GO:0003824);; molecular function: binding (GO:0005488)	--
BMK_Unigene_088457	BUB	PK	1.8326	1.60203	1.32953	1.99428	2.93413	1.8433	0.893197	0.272723	normal	0.836918	-0.428171	normal	0.882279	0.384451	normal	0.680644	0.89254	normal	[RTKL]	--	Molecular Function: protein serine/threonine kinase activity (GO:0004674);; Molecular Function: ATP binding (GO:0005524);; Biological Process: protein phosphorylation (GO:0006468);;	K02178|0|sita:101772623|checkpoint serine/threonine-protein kinase BUB1-like; K02178 checkpoint serine/threonine-protein kinase [EC:2.7.11.1] (A)	[D]	Cell cycle control, cell division, chromosome partitioning	Protein kinase domain;; Mad3/BUB1 homology region 1;; Protein tyrosine kinase	Mitotic checkpoint serine/threonine-protein kinase BUB1 GN=BUB1 OS=Arabidopsis thaliana (Mouse-ear cress) PE=1 SV=1	D	Cell cycle control, cell division, chromosome partitioning	PREDICTED: checkpoint serine/threonine-protein kinase BUB1-like [Setaria italica]	biological process: metabolic process (GO:0008152);; biological process: cellular process (GO:0009987);; molecular function: catalytic activity (GO:0003824);; molecular function: binding (GO:0005488)	--
BMK_Unigene_018315	CAMK_AMPK	PK	22.1552	43.1609	21.4909	16.9915	33.2276	13.5358	0.301468	-0.525081	normal	0.0696264	-0.869725	normal	0.965435	-0.0604128	normal	0.307512	-0.48476	normal	[RTKL]	--	Molecular Function: protein serine/threonine kinase activity (GO:0004674);; Molecular Function: ATP binding (GO:0005524);; Cellular Component: endosome (GO:0005768);; Cellular Component: Golgi apparatus (GO:0005794);; Cellular Component: trans-Golgi network (GO:0005802);; Cellular Component: plasma membrane (GO:0005886);; Biological Process: protein phosphorylation (GO:0006468);; Molecular Functi…	--	[T]	Signal transduction mechanisms	Protein kinase domain;; Protein tyrosine kinase;; Kinase associated domain 1;; Kinase-like;; RIO1 family;; Putative S-adenosyl-L-methionine-dependent methyltransferase;; Methyltransferase domain;; Methyltransferase domain	SNF1-related protein kinase catalytic subunit alpha KIN10 GN=At3g01090 OS=Arabidopsis thaliana (Mouse-ear cress) PE=1 SV=2	R	General function prediction only	PREDICTED: probable pectin methyltransferase QUA2-like [Setaria italica]	biological process: metabolic process (GO:0008152);; biological process: cellular process (GO:0009987);; molecular function: catalytic activity (GO:0003824);; molecular function: binding (GO:0005488);; cellular component: cell (GO:0005623);; cellular component: organelle (GO:0043226);; cellular component: cell part (GO:0044464);; cellular component: organelle part (GO:0044422);; cellular componen…	--
BMK_Unigene_018547	CAMK_AMPK	PK	6.64901	2.4103	2.0761	9.3797	6.03365	2.17861	0.256965	-1.04935	normal	0.300332	-1.1224	normal	0.751897	-0.347037	normal	0.00764207	-1.66312	down	[RTKL]	--	Molecular Function: protein serine/threonine kinase activity (GO:0004674);; Molecular Function: protein tyrosine kinase activity (GO:0004713);; Molecular Function: ATP binding (GO:0005524);; Biological Process: protein phosphorylation (GO:0006468);;	K07198|1.44072e-63|zma:103647175|SNF1-related protein kinase catalytic subunit alpha KIN10-like; K07198 5'-AMP-activated protein kinase, catalytic alpha subunit [EC:2.7.11.11] (A)	[T]	Signal transduction mechanisms	Protein kinase domain;; Protein tyrosine kinase	SNF1-related protein kinase catalytic subunit alpha KIN11 GN=MXE2.16 OS=Arabidopsis thaliana (Mouse-ear cress) PE=1 SV=1	T	Signal transduction mechanisms	PREDICTED: SNF1-related protein kinase catalytic subunit alpha KIN10-like isoform X1 [Zea mays]	biological process: metabolic process (GO:0008152);; biological process: cellular process (GO:0009987);; molecular function: catalytic activity (GO:0003824);; biological process: single-organism process (GO:0044699);; molecular function: binding (GO:0005488)	Regulation of autophagy (ko04140)
BMK_Unigene_020504	CAMK_AMPK	PK	35.2125	58.0501	43.039	34.5775	41.5268	36.9889	0.0111551	1.08643	normal	0.18239	0.816654	normal	0.514531	0.525115	normal	0.239396	0.46828	normal	[RTKL]	--	Molecular Function: protein serine/threonine kinase activity (GO:0004674);; Molecular Function: protein tyrosine kinase activity (GO:0004713);; Molecular Function: ATP binding (GO:0005524);; Biological Process: protein phosphorylation (GO:0006468);;	K07198|0|sita:101769880|carbon catabolite-derepressing protein kinase-like; K07198 5'-AMP-activated protein kinase, catalytic alpha subunit [EC:2.7.11.11] (A)	[T]	Signal transduction mechanisms	Protein kinase domain;; Protein tyrosine kinase;; Kinase associated domain 1;; Kinase-like;; RIO1 family	Carbon catabolite-derepressing protein kinase GN=RKIN1 OS=Secale cereale (Rye) PE=2 SV=1	T	Signal transduction mechanisms	PREDICTED: carbon catabolite-derepressing protein kinase-like [Setaria italica]	biological process: metabolic process (GO:0008152);; biological process: cellular process (GO:0009987);; molecular function: catalytic activity (GO:0003824);; biological process: single-organism process (GO:0044699);; molecular function: binding (GO:0005488)	Regulation of autophagy (ko04140)
BMK_Unigene_037725	CAMK_AMPK	PK	14.4673	6.84603	12.3474	16.7093	12.3579	8.21989	0.0854234	-1.56702	normal	0.883866	-0.168854	normal	0.751897	-0.486344	normal	0.663431	-0.645541	normal	[RTKL]	--	Molecular Function: protein serine/threonine kinase activity (GO:0004674);; Molecular Function: protein tyrosine kinase activity (GO:0004713);; Molecular Function: ATP binding (GO:0005524);; Biological Process: protein phosphorylation (GO:0006468);;	K07198|1.1235e-86|sita:101785071|SNF1-related protein kinase catalytic subunit alpha KIN10-like; K07198 5'-AMP-activated protein kinase, catalytic alpha subunit [EC:2.7.11.11] (A)	[T]	Signal transduction mechanisms	Protein kinase domain;; Protein tyrosine kinase	SNF1-related protein kinase catalytic subunit alpha KIN10 GN=At3g01090 OS=Arabidopsis thaliana (Mouse-ear cress) PE=1 SV=2	T	Signal transduction mechanisms	PREDICTED: SNF1-related protein kinase catalytic subunit alpha KIN10-like [Setaria italica]	biological process: metabolic process (GO:0008152);; biological process: cellular process (GO:0009987);; molecular function: catalytic activity (GO:0003824);; biological process: single-organism process (GO:0044699);; molecular function: binding (GO:0005488)	Regulation of autophagy (ko04140)
BMK_Unigene_056006	CAMK_AMPK	PK	0.452639	0	0	0.437675	0.108758	0.0527618	0.401016	-2.48017	normal	0.486212	-2.27912	normal	0.8057	-0.735982	normal	0.699326	-1.17432	normal	[RTKL]	--	Molecular Function: protein serine/threonine kinase activity (GO:0004674);; Molecular Function: ATP binding (GO:0005524);; Biological Process: protein phosphorylation (GO:0006468);;	K07198|3.94412e-52|gsl:Gasu_30650|serine/threonine protein kinase (EC:2.7.11.1); K07198 5'-AMP-activated protein kinase, catalytic alpha subunit [EC:2.7.11.11] (A)	[T]	Signal transduction mechanisms	Protein kinase domain;; Protein tyrosine kinase	SNF1-related protein kinase catalytic subunit alpha KIN10 GN=At3g01090 OS=Arabidopsis thaliana (Mouse-ear cress) PE=1 SV=2	T	Signal transduction mechanisms	hypothetical protein SNOG_05495 [Phaeosphaeria nodorum SN15]	biological process: metabolic process (GO:0008152);; biological process: cellular process (GO:0009987);; molecular function: catalytic activity (GO:0003824);; molecular function: binding (GO:0005488)	--
BMK_Unigene_076026	CAMK_AMPK	PK	0.200837	0.316121	0.542073	0	0.774639	0.322292	0.697357	0.837533	normal	0.623544	1.49555	normal	0.00743608	4.17091	up	0.0663966	3.23943	normal	[RTKL]	--	Biological Process: metabolic process (GO:0008152);; Biological Process: cellular process (GO:0009987);; Molecular Function: transferase activity, transferring phosphorus-containing groups (GO:0016772);; Biological Process: single-organism process (GO:0044699);;	K07198|3.69189e-44|mtr:MTR_3g099920|SNF1-related protein kinase; K07198 5'-AMP-activated protein kinase, catalytic alpha subunit [EC:2.7.11.11] (A)	[T]	Signal transduction mechanisms	Protein kinase domain;; Protein tyrosine kinase	SNF1-related protein kinase catalytic subunit alpha KIN10 GN=At3g01090 OS=Arabidopsis thaliana (Mouse-ear cress) PE=1 SV=2	T	Signal transduction mechanisms	Protein kinase, catalytic domain-containing protein [Rozella allomycis CSF55]	biological process: metabolic process (GO:0008152);; biological process: cellular process (GO:0009987);; molecular function: catalytic activity (GO:0003824);; biological process: single-organism process (GO:0044699)	Regulation of autophagy (ko04140)
BMK_Unigene_003144	CAMK_CAMK1-DCAMKL	PK	2.02684	0.91807	0.455945	0.0975013	0	0	0.70632	-0.696091	normal	0.466623	-1.4853	normal	0.751897	-0.804111	normal	0.699326	-0.872999	normal	[RTKL]	--	Molecular Function: transferase activity, transferring phosphorus-containing groups (GO:0016772);;	K08794|1.3945e-34|vcn:VOLCADRAFT_79621|hypothetical protein; K08794 calcium/calmodulin-dependent protein kinase I [EC:2.7.11.17] (A)	[T]	Signal transduction mechanisms	Protein kinase domain;; Protein tyrosine kinase;; Lipopolysaccharide kinase (Kdo/WaaP) family;; Kinase-like;; Phosphotransferase enzyme family	Serine/threonine-protein kinase PKZ1 {ECO:0000303|PubMed:15819621} OS=Phytophthora infestans (Potato late blight fungus) PE=1 SV=1	T	Signal transduction mechanisms	CAMK protein kinase [Phytophthora parasitica INRA-310]	biological process: metabolic process (GO:0008152);; molecular function: catalytic activity (GO:0003824)	--
BMK_Unigene_011742	CAMK_CAMK1-DCAMKL	PK	1.90471	0.354175	0.976772	2.99799	0.881402	0.199323	0.1226	-1.90359	normal	0.769816	-0.402337	normal	0.252732	-1.3948	normal	0.00098668	-3.15409	down	[RTKL]	--	Molecular Function: calmodulin-dependent protein kinase activity (GO:0004683);; Molecular Function: calcium ion binding (GO:0005509);; Molecular Function: calmodulin binding (GO:0005516);; Molecular Function: ATP binding (GO:0005524);; Biological Process: protein phosphorylation (GO:0006468);; Cellular Component: integral component of membrane (GO:0016021);;	--	[T]	Signal transduction mechanisms	Protein kinase domain;; Protein tyrosine kinase;; Lipopolysaccharide kinase (Kdo/WaaP) family	Calcium and calcium/calmodulin-dependent serine/threonine-protein kinase OS=Oryza sativa subsp. japonica (Rice) PE=2 SV=1	T	Signal transduction mechanisms	PREDICTED: calcium and calcium/calmodulin-dependent serine/threonine-protein kinase-like [Setaria italica]	biological process: metabolic process (GO:0008152);; biological process: cellular process (GO:0009987);; molecular function: catalytic activity (GO:0003824);; molecular function: binding (GO:0005488);; cellular component: membrane (GO:0016020);; cellular component: membrane part (GO:0044425)	--
BMK_Unigene_018032	CAMK_CAMK1-DCAMKL	PK	6.62968	2.94348	1.98493	5.47692	3.74941	2.22792	0.290009	-0.776956	normal	0.142917	-1.19978	normal	0.80433	-0.274637	normal	0.060008	-0.902621	normal	[RTKL]	--	Molecular Function: calmodulin-dependent protein kinase activity (GO:0004683);; Molecular Function: calcium ion binding (GO:0005509);; Molecular Function: calmodulin binding (GO:0005516);; Molecular Function: ATP binding (GO:0005524);; Biological Process: protein phosphorylation (GO:0006468);; Cellular Component: integral component of membrane (GO:0016021);;	--	[T]	Signal transduction mechanisms	Protein kinase domain;; Protein tyrosine kinase;; EF-hand domain pair;; EF hand;; EF-hand domain;; EF hand;; EF-hand domain pair;; Lipopolysaccharide kinase (Kdo/WaaP) family	Calcium and calcium/calmodulin-dependent serine/threonine-protein kinase OS=Oryza sativa subsp. japonica (Rice) PE=2 SV=1	T	Signal transduction mechanisms	PREDICTED: calcium and calcium/calmodulin-dependent serine/threonine-protein kinase-like [Setaria italica]	biological process: metabolic process (GO:0008152);; biological process: cellular process (GO:0009987);; molecular function: catalytic activity (GO:0003824);; molecular function: binding (GO:0005488);; cellular component: membrane (GO:0016020);; cellular component: membrane part (GO:0044425)	--
BMK_Unigene_025870	CAMK_CAMK1-DCAMKL	PK	0.883093	0	0	0.217599	0	0.215242	0.509164	-2.09511	normal	0.61114	-1.82505	normal	0.751897	-0.741552	normal	0.978771	0.0731089	normal	[RTKL]	--	Molecular Function: calmodulin-dependent protein kinase activity (GO:0004683);; Molecular Function: ATP binding (GO:0005524);; Biological Process: protein phosphorylation (GO:0006468);;	K04345|1.075e-17|smo:SELMODRAFT_137987|hypothetical protein; K04345 protein kinase A [EC:2.7.11.11] (A)	[T]	Signal transduction mechanisms	Protein kinase domain;; Protein tyrosine kinase	Calcium-dependent protein kinase 23 GN=CPK23 OS=Arabidopsis thaliana (Mouse-ear cress) PE=1 SV=1	T	Signal transduction mechanisms	calmodulin-dependent protein kinase [Talaromyces cellulolyticus]	biological process: metabolic process (GO:0008152);; biological process: cellular process (GO:0009987);; molecular function: catalytic activity (GO:0003824);; molecular function: binding (GO:0005488)	--
BMK_Unigene_026608	CAMK_CAMK1-DCAMKL	PK	0.109698	0	0.167966	0	0	0.319149	0.613943	-1.2798	normal	0.876438	0.556167	normal	--	--	--	0.516403	1.6881	normal	[RTKL]	--	Molecular Function: protein serine/threonine kinase activity (GO:0004674);; Molecular Function: ATP binding (GO:0005524);; Biological Process: protein phosphorylation (GO:0006468);;	K08794|1.67534e-08|cre:CHLREDRAFT_113407|hypothetical protein; K08794 calcium/calmodulin-dependent protein kinase I [EC:2.7.11.17] (A)	[T]	Signal transduction mechanisms	Protein kinase domain	Calcium and calcium/calmodulin-dependent serine/threonine-protein kinase GN=CCAMK OS=Lilium longiflorum (Trumpet lily) PE=1 SV=1	T	Signal transduction mechanisms	hypothetical protein CFIO01_07921 [Colletotrichum fioriniae PJ7]	biological process: metabolic process (GO:0008152);; biological process: cellular process (GO:0009987);; molecular function: catalytic activity (GO:0003824);; molecular function: binding (GO:0005488)	--
BMK_Unigene_030836	CAMK_CAMK1-DCAMKL	PK	5.73556	1.21762	0.802348	0.0352162	0	0	0.60326	-1.39652	normal	0.315921	-2.0347	normal	--	--	--	--	--	--	[RTKL]	--	Molecular Function: phosphorylase kinase activity (GO:0004689);; Molecular Function: calmodulin binding (GO:0005516);; Molecular Function: ATP binding (GO:0005524);; Cellular Component: phosphorylase kinase complex (GO:0005964);; Biological Process: glycogen biosynthetic process (GO:0005978);; Biological Process: protein phosphorylation (GO:0006468);; Cellular Component: intracellular organelle (…	--	[T]	Signal transduction mechanisms	Protein kinase domain;; Protein tyrosine kinase	Calcium-dependent protein kinase 23 GN=CPK23 OS=Arabidopsis thaliana (Mouse-ear cress) PE=1 SV=1	T	Signal transduction mechanisms	CAMK protein kinase [Phytophthora parasitica INRA-310]	biological process: metabolic process (GO:0008152);; biological process: cellular process (GO:0009987);; molecular function: catalytic activity (GO:0003824);; molecular function: binding (GO:0005488);; cellular component: cell (GO:0005623);; cellular component: macromolecular complex (GO:0032991);; cellular component: cell part (GO:0044464);; biological process: single-organism process (GO:004469…	--
BMK_Unigene_036447	CAMK_CAMK1-DCAMKL	PK	0	0	0.253968	0.188564	0	0.141421	--	--	--	0.46128	2.36028	normal	0.751897	-0.847107	normal	0.995744	0.0144818	normal	[RTKL]	--	Molecular Function: kinase activity (GO:0016301);;	K13412|6.19924e-25|cit:102627915|calcium and calcium/calmodulin-dependent serine/threonine-protein kinase-like; K13412 calcium-dependent protein kinase [EC:2.7.11.1] (A)	[T]	Signal transduction mechanisms	Protein kinase domain;; Protein tyrosine kinase;; Kinase-like	Calcium/calmodulin-dependent serine/threonine-protein kinase OS=Malus domestica (Apple) PE=2 SV=1	T	Signal transduction mechanisms	hypothetical protein CHGG_01620 [Chaetomium globosum CBS 148.51]	biological process: metabolic process (GO:0008152);; biological process: cellular process (GO:0009987);; molecular function: catalytic activity (GO:0003824)	Plant-pathogen interaction (ko04626)
BMK_Unigene_050822	CAMK_CAMK1-DCAMKL	PK	0.127909	0	0	0.115308	0	0	--	--	--	--	--	--	--	--	--	--	--	--	[RTKL]	--	Molecular Function: nucleotide binding (GO:0000166);; Molecular Function: protein kinase activity (GO:0004672);; Biological Process: phosphorylation (GO:0016310);;	--	[T]	Signal transduction mechanisms	Protein kinase domain;; Protein tyrosine kinase	Calcium-dependent protein kinase 24 GN=CPK24 OS=Arabidopsis thaliana (Mouse-ear cress) PE=2 SV=1	--	--	CAMK protein kinase [Phytophthora parasitica]	molecular function: binding (GO:0005488);; biological process: metabolic process (GO:0008152);; biological process: cellular process (GO:0009987);; molecular function: catalytic activity (GO:0003824)	--
BMK_Unigene_059580	CAMK_CAMK1-DCAMKL	PK	0	0.197701	0	0	0	0.0949131	0.60326	1.45718	normal	--	--	--	--	--	--	--	--	--	[RTKL]	--	Molecular Function: nucleotide binding (GO:0000166);; Molecular Function: protein serine/threonine kinase activity (GO:0004674);; Biological Process: phosphorylation (GO:0016310);; Biological Process: primary metabolic process (GO:0044238);; Biological Process: cellular macromolecule metabolic process (GO:0044260);;	K13412|1.50845e-25|sot:102601318|calcium-dependent protein kinase SK5-like; K13412 calcium-dependent protein kinase [EC:2.7.11.1] (A)	[T]	Signal transduction mechanisms	Protein kinase domain;; Protein tyrosine kinase	Calcium-dependent protein kinase 23 GN=CPK23 OS=Arabidopsis thaliana (Mouse-ear cress) PE=1 SV=1	T	Signal transduction mechanisms	CAMK/CAMK1 protein kinase [Saprolegnia diclina VS20]	molecular function: binding (GO:0005488);; biological process: metabolic process (GO:0008152);; biological process: cellular process (GO:0009987);; molecular function: catalytic activity (GO:0003824)	Plant-pathogen interaction (ko04626)
BMK_Unigene_060546	CAMK_CAMK1-DCAMKL	PK	0	0	0.0907599	0.17548	0	0.259396	--	--	--	--	--	--	0.751897	-0.722927	normal	0.903511	0.368563	normal	[RTKL]	--	Molecular Function: nucleotide binding (GO:0000166);; Molecular Function: protein serine/threonine kinase activity (GO:0004674);; Biological Process: phosphorylation (GO:0016310);; Molecular Function: anion binding (GO:0043168);; Cellular Component: intracellular organelle (GO:0043229);; Biological Process: primary metabolic process (GO:0044238);; Biological Process: cellular macromolecule metabo…	--	[T]	Signal transduction mechanisms	Protein kinase domain	Calcium-dependent protein kinase 15 GN=CPK15 OS=Arabidopsis thaliana (Mouse-ear cress) PE=2 SV=1	T	Signal transduction mechanisms	CAMK/CDPK protein kinase [Phytophthora parasitica]	molecular function: binding (GO:0005488);; biological process: metabolic process (GO:0008152);; biological process: cellular process (GO:0009987);; molecular function: catalytic activity (GO:0003824);; cellular component: cell (GO:0005623);; cellular component: organelle (GO:0043226);; cellular component: cell part (GO:0044464)	--
BMK_Unigene_067055	CAMK_CAMK1-DCAMKL	PK	0.5684	0	0	0.308291	0	0	0.60326	-1.63327	normal	0.650012	-1.5061	normal	0.751897	-0.79458	normal	0.699326	-0.860962	normal	[RTKL]	--	Cellular Component: chromosome, centromeric region (GO:0000775);; Molecular Function: phosphorylase kinase activity (GO:0004689);; Molecular Function: calmodulin binding (GO:0005516);; Molecular Function: ATP binding (GO:0005524);; Cellular Component: nucleus (GO:0005634);; Cellular Component: phosphorylase kinase complex (GO:0005964);; Biological Process: glycogen biosynthetic process (GO:000597…	--	[T]	Signal transduction mechanisms	Protein kinase domain;; Protein tyrosine kinase	Calcium-dependent protein kinase 23 GN=CPK23 OS=Arabidopsis thaliana (Mouse-ear cress) PE=1 SV=1	T	Signal transduction mechanisms	hypothetical protein PHYSODRAFT_560377 [Phytophthora sojae]	cellular component: cell (GO:0005623);; cellular component: organelle (GO:0043226);; cellular component: organelle part (GO:0044422);; cellular component: cell part (GO:0044464);; biological process: metabolic process (GO:0008152);; biological process: cellular process (GO:0009987);; molecular function: catalytic activity (GO:0003824);; molecular function: binding (GO:0005488);; cellular componen…	--
BMK_Unigene_067659	CAMK_CAMK1-DCAMKL	PK	0	0.414964	0	0.410354	0	0	0.60326	1.69398	normal	--	--	--	0.751897	-0.926928	normal	0.699326	-1.01432	normal	[RTKL]	--	Molecular Function: nucleotide binding (GO:0000166);; Molecular Function: protein kinase activity (GO:0004672);; Biological Process: phosphorylation (GO:0016310);;	K08794|7.51654e-19|vcn:VOLCADRAFT_79621|hypothetical protein; K08794 calcium/calmodulin-dependent protein kinase I [EC:2.7.11.17] (A)	[T]	Signal transduction mechanisms	Protein kinase domain	Calcium and calcium/calmodulin-dependent serine/threonine-protein kinase GN=CCAMK OS=Lilium longiflorum (Trumpet lily) PE=1 SV=1	T	Signal transduction mechanisms	hypothetical protein L915_04364 [Phytophthora parasitica]	molecular function: binding (GO:0005488);; biological process: metabolic process (GO:0008152);; biological process: cellular process (GO:0009987);; molecular function: catalytic activity (GO:0003824)	--
BMK_Unigene_076183	CAMK_CAMK1-DCAMKL	PK	0	0.209532	0.0714336	0	0.201002	0.065146	0.60326	1.68336	normal	--	--	--	0.751897	0.872266	normal	--	--	--	[RTKL]	--	Molecular Function: protein kinase activity (GO:0004672);; Molecular Function: binding (GO:0005488);; Biological Process: cellular metabolic process (GO:0044237);;	K08794|4.70072e-35|ccp:CHC_T00008462001|Serine/threonine protein kinase; K08794 calcium/calmodulin-dependent protein kinase I [EC:2.7.11.17] (A)	[T]	Signal transduction mechanisms	Protein kinase domain;; Protein tyrosine kinase	Calcium-dependent protein kinase 15 GN=CPK15 OS=Arabidopsis thaliana (Mouse-ear cress) PE=2 SV=1	T	Signal transduction mechanisms	CAMK/CAMK1 protein kinase, variant 1 [Phytophthora parasitica INRA-310]	biological process: metabolic process (GO:0008152);; biological process: cellular process (GO:0009987);; molecular function: catalytic activity (GO:0003824);; molecular function: binding (GO:0005488)	--
BMK_Unigene_097395	CAMK_CAMK1-DCAMKL	PK	0.612264	0	0.239573	0	0	0	0.560305	-1.91252	normal	0.885459	-0.511285	normal	--	--	--	--	--	--	[RTKL]	--	Cellular Component: chromosome, centromeric region (GO:0000775);; Molecular Function: phosphorylase kinase activity (GO:0004689);; Molecular Function: calmodulin binding (GO:0005516);; Molecular Function: ATP binding (GO:0005524);; Cellular Component: nucleus (GO:0005634);; Cellular Component: phosphorylase kinase complex (GO:0005964);; Biological Process: glycogen biosynthetic process (GO:000597…	--	[T]	Signal transduction mechanisms	Protein kinase domain;; Protein tyrosine kinase	CBL-interacting protein kinase 17 OS=Oryza sativa subsp. japonica (Rice) PE=2 SV=1	T	Signal transduction mechanisms	CAMK/CAMK1 protein kinase [Aphanomyces astaci]	cellular component: cell (GO:0005623);; cellular component: organelle (GO:0043226);; cellular component: organelle part (GO:0044422);; cellular component: cell part (GO:0044464);; biological process: metabolic process (GO:0008152);; biological process: cellular process (GO:0009987);; molecular function: catalytic activity (GO:0003824);; molecular function: binding (GO:0005488);; cellular componen…	--
BMK_Unigene_103089	CAMK_CAMK1-DCAMKL	PK	0	0	0	0	0.233882	0	--	--	--	--	--	--	0.751897	0.797908	normal	--	--	--	[RTKL]	--	Molecular Function: nucleotide binding (GO:0000166);; Molecular Function: protein serine/threonine kinase activity (GO:0004674);; Biological Process: phosphorylation (GO:0016310);; Biological Process: primary metabolic process (GO:0044238);; Biological Process: cellular macromolecule metabolic process (GO:0044260);;	K08269|3.61768e-19|cam:101504386|serine/threonine-protein kinase ULK3-like; K08269 serine/threonine-protein kinase ULK/ATG1 [EC:2.7.11.1] (A)	[T]	Signal transduction mechanisms	Protein kinase domain;; Protein tyrosine kinase	CBL-interacting serine/threonine-protein kinase 10 GN=At5g58380 OS=Arabidopsis thaliana (Mouse-ear cress) PE=1 SV=1	T	Signal transduction mechanisms	Serine/threonine-dual specificity kinase domain-containing protein [Rozella allomycis CSF55]	molecular function: binding (GO:0005488);; biological process: metabolic process (GO:0008152);; biological process: cellular process (GO:0009987);; molecular function: catalytic activity (GO:0003824)	Regulation of autophagy (ko04140)
BMK_Unigene_105912	CAMK_CAMK1-DCAMKL	PK	0	0	0.15925	0	0.322179	0	--	--	--	0.650012	1.64995	normal	0.751897	1.02426	normal	--	--	--	[RTKL]	--	Molecular Function: protein serine/threonine kinase activity (GO:0004674);; Molecular Function: ATP binding (GO:0005524);; Biological Process: protein phosphorylation (GO:0006468);;	K08794|6.22171e-42|vcn:VOLCADRAFT_79621|hypothetical protein; K08794 calcium/calmodulin-dependent protein kinase I [EC:2.7.11.17] (A)	[D]	Cell cycle control, cell division, chromosome partitioning	Protein kinase domain;; Protein tyrosine kinase;; Kinase-like	CBL-interacting protein kinase 17 OS=Oryza sativa subsp. japonica (Rice) PE=2 SV=1	D	Cell cycle control, cell division, chromosome partitioning	putative checkpoint kinase 2-like protein [Eutypa lata UCREL1]	biological process: metabolic process (GO:0008152);; biological process: cellular process (GO:0009987);; molecular function: catalytic activity (GO:0003824);; molecular function: binding (GO:0005488)	--
BMK_Unigene_000644	CAMK_CAMKL-CHK1	PK	2.68023	3.71622	2.60157	1.65389	3.59247	1.21491	0.228515	0.840583	normal	0.750438	0.399094	normal	0.187156	1.33279	normal	0.952965	-0.0691173	normal	[RTKL]	--	Molecular Function: protein serine/threonine kinase activity (GO:0004674);; Molecular Function: ATP binding (GO:0005524);; Biological Process: protein phosphorylation (GO:0006468);; Biological Process: signal transduction (GO:0007165);; Cellular Component: plastid (GO:0009536);;	--	[T]	Signal transduction mechanisms	Protein kinase domain;; NAF domain;; Protein tyrosine kinase	CBL-interacting protein kinase 19 GN=P0022D06.5 OS=Oryza sativa subsp. japonica (Rice) PE=1 SV=1	T	Signal transduction mechanisms	CBL-interacting serine/threonine-protein kinase 11 [Zea mays]	biological process: metabolic process (GO:0008152);; biological process: cellular process (GO:0009987);; molecular function: catalytic activity (GO:0003824);; molecular function: binding (GO:0005488);; biological process: signaling (GO:0023052);; biological process: single-organism process (GO:0044699);; biological process: response to stimulus (GO:0050896);; biological process: biological regula…	--
BMK_Unigene_001688	CAMK_CAMKL-CHK1	PK	87.3043	125.131	117.158	44.309	112.721	100.913	0.19715	0.670578	normal	0.896462	0.120699	normal	0.000357082	1.50652	up	8.26388e-06	1.43152	up	[RTKL]	--	Molecular Function: protein serine/threonine kinase activity (GO:0004674);; Molecular Function: ATP binding (GO:0005524);; Cellular Component: cytoplasm (GO:0005737);; Biological Process: protein phosphorylation (GO:0006468);; Biological Process: signal transduction (GO:0007165);; Biological Process: response to cold (GO:0009409);; Biological Process: response to wounding (GO:0009611);; Biologica…	--	[T]	Signal transduction mechanisms	Protein kinase domain;; Protein tyrosine kinase;; NAF domain;; Kinase-like	CBL-interacting protein kinase 9 OS=Oryza sativa subsp. japonica (Rice) PE=2 SV=1	--	--	PREDICTED: CBL-interacting protein kinase 9-like [Setaria italica]	biological process: metabolic process (GO:0008152);; biological process: cellular process (GO:0009987);; molecular function: catalytic activity (GO:0003824);; molecular function: binding (GO:0005488);; cellular component: cell (GO:0005623);; cellular component: cell part (GO:0044464);; biological process: signaling (GO:0023052);; biological process: single-organism process (GO:0044699);; biologic…	--
BMK_Unigene_003810	CAMK_CAMKL-CHK1	PK	5.46477	4.28966	7.04751	5.29464	5.7942	5.32886	0.699269	0.420077	normal	0.791583	0.414568	normal	0.911224	-0.25934	normal	0.893158	-0.210599	normal	[RTKL]	--	Molecular Function: protein serine/threonine kinase activity (GO:0004674);; Molecular Function: ATP binding (GO:0005524);; Cellular Component: plasma membrane (GO:0005886);; Biological Process: protein phosphorylation (GO:0006468);; Biological Process: signal transduction (GO:0007165);; Cellular Component: plastid (GO:0009536);; Biological Process: response to salt stress (GO:0009651);; Biologica…	K07198|0|sita:101754539|CBL-interacting protein kinase 21-like; K07198 5'-AMP-activated protein kinase, catalytic alpha subunit [EC:2.7.11.11] (A)	[T]	Signal transduction mechanisms	Protein kinase domain;; Protein tyrosine kinase;; NAF domain;; DYW family of nucleic acid deaminases	CBL-interacting protein kinase 21 GN=OJ1136_D11.123 OS=Oryza sativa subsp. japonica (Rice) PE=2 SV=2	--	--	PREDICTED: CBL-interacting protein kinase 21-like [Setaria italica]	biological process: metabolic process (GO:0008152);; biological process: cellular process (GO:0009987);; molecular function: catalytic activity (GO:0003824);; molecular function: binding (GO:0005488);; cellular component: cell (GO:0005623);; cellular component: membrane (GO:0016020);; cellular component: cell part (GO:0044464);; biological process: signaling (GO:0023052);; biological process: sin…	Regulation of autophagy (ko04140)
BMK_Unigene_004122	CAMK_CAMKL-CHK1	PK	20.1936	29.8228	34.1698	22.4973	29.9057	26.6833	0.0216194	0.930938	normal	0.0119627	1.27034	normal	0.585262	0.678824	normal	0.320646	0.60694	normal	[RTKL]	--	Molecular Function: protein serine/threonine kinase activity (GO:0004674);; Molecular Function: ATP binding (GO:0005524);; Cellular Component: nucleus (GO:0005634);; Cellular Component: mitochondrion (GO:0005739);; Biological Process: protein phosphorylation (GO:0006468);; Biological Process: signal transduction (GO:0007165);; Biological Process: response to abiotic stimulus (GO:0009628);; Biolog…	--	[T]	Signal transduction mechanisms	Protein kinase domain;; Protein tyrosine kinase	CBL-interacting protein kinase 32 GN=CIPK32 OS=Oryza sativa subsp. japonica (Rice) PE=2 SV=2	T	Signal transduction mechanisms	PREDICTED: CBL-interacting protein kinase 32-like isoform X10 [Setaria italica]	biological process: metabolic process (GO:0008152);; biological process: cellular process (GO:0009987);; molecular function: catalytic activity (GO:0003824);; molecular function: binding (GO:0005488);; cellular component: cell (GO:0005623);; cellular component: organelle (GO:0043226);; cellular component: cell part (GO:0044464);; biological process: signaling (GO:0023052);; biological process: si…	--
BMK_Unigene_004717	CAMK_CAMKL-CHK1	PK	2.11317	1.4501	0.620401	1.86596	1.98896	0.683512	0.918123	-0.148181	normal	0.407451	-1.19256	normal	0.804872	0.363706	normal	0.565103	-0.966785	normal	[RTKL]	--	Molecular Function: protein serine/threonine kinase activity (GO:0004674);; Molecular Function: ATP binding (GO:0005524);; Biological Process: protein phosphorylation (GO:0006468);; Biological Process: negative regulation of abscisic acid-activated signaling pathway (GO:0009788);; Cellular Component: membrane (GO:0016020);;	--	[T]	Signal transduction mechanisms	Protein kinase domain;; Protein tyrosine kinase	CBL-interacting protein kinase 11 GN=P0031D02.33-1 OS=Oryza sativa subsp. japonica (Rice) PE=2 SV=1	--	--	hypothetical protein OsJ_03914 [Oryza sativa Japonica Group]	biological process: metabolic process (GO:0008152);; biological process: cellular process (GO:0009987);; molecular function: catalytic activity (GO:0003824);; molecular function: binding (GO:0005488);; biological process: biological regulation (GO:0065007);; cellular component: membrane (GO:0016020)	--
BMK_Unigene_005705	CAMK_CAMKL-CHK1	PK	5.05162	1.4436	1.55432	5.47726	3.00087	2.78267	0.0949136	-1.37671	normal	0.182731	-1.16074	normal	0.751897	-0.557479	normal	0.526612	-0.576794	normal	[RTKL]	--	Molecular Function: protein serine/threonine kinase activity (GO:0004674);; Molecular Function: protein tyrosine kinase activity (GO:0004713);; Molecular Function: ATP binding (GO:0005524);; Cellular Component: plasma membrane (GO:0005886);; Biological Process: protein phosphorylation (GO:0006468);; Biological Process: signal transduction (GO:0007165);; Biological Process: response to salt stress…	K07198|1.20601e-25|sita:101767148|CBL-interacting protein kinase 17-like; K07198 5'-AMP-activated protein kinase, catalytic alpha subunit [EC:2.7.11.11] (A)	[T]	Signal transduction mechanisms	Protein kinase domain;; Protein tyrosine kinase	CBL-interacting protein kinase 1 GN=P0706B05.31 OS=Oryza sativa subsp. japonica (Rice) PE=2 SV=1	--	--	PREDICTED: CBL-interacting protein kinase 17-like [Setaria italica]	biological process: metabolic process (GO:0008152);; biological process: cellular process (GO:0009987);; molecular function: catalytic activity (GO:0003824);; biological process: single-organism process (GO:0044699);; molecular function: binding (GO:0005488);; cellular component: cell (GO:0005623);; cellular component: membrane (GO:0016020);; cellular component: cell part (GO:0044464);; biologica…	Regulation of autophagy (ko04140)
BMK_Unigene_006078	CAMK_CAMKL-CHK1	PK	1.50743	2.07993	4.77555	0.106878	2.26808	5.20118	0.60326	0.786979	normal	0.0266776	2.05862	normal	0.000221214	3.98046	up	1.42491e-13	5.46056	up	[RTKL]	--	Molecular Function: protein serine/threonine kinase activity (GO:0004674);; Molecular Function: ATP binding (GO:0005524);; Biological Process: protein phosphorylation (GO:0006468);; Biological Process: signal transduction (GO:0007165);;	--	[T]	Signal transduction mechanisms	Protein kinase domain;; NAF domain;; Protein tyrosine kinase	Putative CBL-interacting protein kinase 13 OS=Oryza sativa subsp. japonica (Rice) PE=3 SV=1	T	Signal transduction mechanisms	PREDICTED: putative CBL-interacting protein kinase 13-like [Setaria italica]	biological process: metabolic process (GO:0008152);; biological process: cellular process (GO:0009987);; molecular function: catalytic activity (GO:0003824);; molecular function: binding (GO:0005488);; biological process: signaling (GO:0023052);; biological process: single-organism process (GO:0044699);; biological process: response to stimulus (GO:0050896);; biological process: biological regula…	--
BMK_Unigene_008235	CAMK_CAMKL-CHK1	PK	0.23244	0.12846	4.25262	0.125412	0.0986941	1.33629	0.89765	-0.372137	normal	0.000288919	4.29796	up	0.992807	-0.0334319	normal	0.00304426	3.2335	up	[RTKL]	--	Molecular Function: protein serine/threonine kinase activity (GO:0004674);; Molecular Function: ATP binding (GO:0005524);; Biological Process: protein phosphorylation (GO:0006468);; Biological Process: negative regulation of abscisic acid-activated signaling pathway (GO:0009788);;	--	[T]	Signal transduction mechanisms	NAF domain;; Protein kinase domain;; Protein tyrosine kinase	CBL-interacting protein kinase 28 GN=OsJ_018151 OS=Oryza sativa subsp. japonica (Rice) PE=2 SV=2	T	Signal transduction mechanisms	hypothetical protein SORBIDRAFT_09g023365 [Sorghum bicolor]	biological process: metabolic process (GO:0008152);; biological process: cellular process (GO:0009987);; molecular function: catalytic activity (GO:0003824);; molecular function: binding (GO:0005488);; biological process: biological regulation (GO:0065007)	--
BMK_Unigene_008351	CAMK_CAMKL-CHK1	PK	12.8765	4.28258	5.32297	11.3259	5.87558	4.03313	0.0365007	-1.20421	normal	0.23649	-0.762787	normal	0.401433	-0.649994	normal	0.0111413	-1.09427	normal	[RTKL]	--	Molecular Function: protein serine/threonine kinase activity (GO:0004674);; Molecular Function: ATP binding (GO:0005524);; Biological Process: protein phosphorylation (GO:0006468);; Biological Process: signal transduction (GO:0007165);; Cellular Component: plastid (GO:0009536);;	--	[T]	Signal transduction mechanisms	Protein kinase domain;; NAF domain;; Protein tyrosine kinase;; Kinase-like	CBL-interacting protein kinase 19 GN=P0022D06.5 OS=Oryza sativa subsp. japonica (Rice) PE=1 SV=1	T	Signal transduction mechanisms	PREDICTED: CBL-interacting protein kinase 19-like [Setaria italica]	biological process: metabolic process (GO:0008152);; biological process: cellular process (GO:0009987);; molecular function: catalytic activity (GO:0003824);; molecular function: binding (GO:0005488);; biological process: signaling (GO:0023052);; biological process: single-organism process (GO:0044699);; biological process: response to stimulus (GO:0050896);; biological process: biological regula…	--
BMK_Unigene_011023	CAMK_CAMKL-CHK1	PK	24.8996	21.8171	23.7438	13.3936	10.6172	16.0802	0.852232	0.181945	normal	0.650012	0.433304	normal	0.976661	-0.0779242	normal	0.605372	0.593966	normal	[RTKL]	--	Molecular Function: protein serine/threonine kinase activity (GO:0004674);; Molecular Function: ATP binding (GO:0005524);; Biological Process: protein phosphorylation (GO:0006468);; Biological Process: signal transduction (GO:0007165);; Biological Process: defense response to fungus (GO:0050832);;	--	[T]	Signal transduction mechanisms	Protein kinase domain;; Protein tyrosine kinase	CBL-interacting protein kinase 16 GN=P0701F11.5-1 OS=Oryza sativa subsp. japonica (Rice) PE=2 SV=1	T	Signal transduction mechanisms	PREDICTED: CBL-interacting protein kinase 16-like [Setaria italica]	biological process: metabolic process (GO:0008152);; biological process: cellular process (GO:0009987);; molecular function: catalytic activity (GO:0003824);; molecular function: binding (GO:0005488);; biological process: signaling (GO:0023052);; biological process: single-organism process (GO:0044699);; biological process: response to stimulus (GO:0050896);; biological process: biological regula…	--
BMK_Unigene_011198	CAMK_CAMKL-CHK1	PK	75.5348	121.411	120.37	36.3141	101.503	84.6169	3.88454e-06	1.70298	up	0.00680975	1.69783	up	0.0111927	2.45676	normal	0.0463324	1.5118	normal	[RTKL]	--	Molecular Function: protein serine/threonine kinase activity (GO:0004674);; Molecular Function: ATP binding (GO:0005524);; Cellular Component: cytoplasm (GO:0005737);; Biological Process: protein phosphorylation (GO:0006468);; Biological Process: signal transduction (GO:0007165);; Biological Process: response to cold (GO:0009409);; Biological Process: response to wounding (GO:0009611);; Biologica…	--	[T]	Signal transduction mechanisms	Protein kinase domain;; Protein tyrosine kinase;; NAF domain;; Kinase-like	CBL-interacting protein kinase 9 OS=Oryza sativa subsp. japonica (Rice) PE=2 SV=1	T	Signal transduction mechanisms	PREDICTED: CBL-interacting protein kinase 9-like [Setaria italica]	biological process: metabolic process (GO:0008152);; biological process: cellular process (GO:0009987);; molecular function: catalytic activity (GO:0003824);; molecular function: binding (GO:0005488);; cellular component: cell (GO:0005623);; cellular component: cell part (GO:0044464);; biological process: signaling (GO:0023052);; biological process: single-organism process (GO:0044699);; biologic…	--
BMK_Unigene_012630	CAMK_CAMKL-CHK1	PK	27.4967	27.5275	22.562	30.3517	23.0797	34.5928	0.554457	0.376713	normal	0.732262	0.258544	normal	0.941482	-0.133684	normal	0.59019	0.522311	normal	[RTKL]	--	Molecular Function: protein serine/threonine kinase activity (GO:0004674);; Molecular Function: protein tyrosine kinase activity (GO:0004713);; Molecular Function: ATP binding (GO:0005524);; Cellular Component: plasma membrane (GO:0005886);; Biological Process: signal transduction (GO:0007165);; Biological Process: response to glucose (GO:0009749);; Biological Process: response to nitrate (GO:001…	--	[T]	Signal transduction mechanisms	Protein kinase domain;; Protein tyrosine kinase;; NAF domain	CBL-interacting protein kinase 8 GN=OSJNBa0086A10.18 OS=Oryza sativa subsp. japonica (Rice) PE=2 SV=1	T	Signal transduction mechanisms	PREDICTED: CBL-interacting protein kinase 8-like, partial [Setaria italica]	biological process: metabolic process (GO:0008152);; biological process: cellular process (GO:0009987);; molecular function: catalytic activity (GO:0003824);; biological process: single-organism process (GO:0044699);; molecular function: binding (GO:0005488);; cellular component: cell (GO:0005623);; cellular component: membrane (GO:0016020);; cellular component: cell part (GO:0044464);; biologica…	--
BMK_Unigene_012653	CAMK_CAMKL-CHK1	PK	3.54998	2.4805	10.6614	1.60867	1.64862	5.23163	0.910116	-0.141286	normal	0.190296	1.85877	normal	0.887934	0.28406	normal	0.00495018	1.98019	up	[RTKL]	--	Molecular Function: protein serine/threonine kinase activity (GO:0004674);; Molecular Function: ATP binding (GO:0005524);; Biological Process: protein phosphorylation (GO:0006468);; Biological Process: signal transduction (GO:0007165);;	--	[T]	Signal transduction mechanisms	Protein kinase domain;; Protein tyrosine kinase	CBL-interacting protein kinase 22 GN=OSJNBa0049D13.5 OS=Oryza sativa subsp. japonica (Rice) PE=2 SV=1	T	Signal transduction mechanisms	hypothetical protein SORBIDRAFT_09g014000 [Sorghum bicolor]	biological process: metabolic process (GO:0008152);; biological process: cellular process (GO:0009987);; molecular function: catalytic activity (GO:0003824);; molecular function: binding (GO:0005488);; biological process: signaling (GO:0023052);; biological process: single-organism process (GO:0044699);; biological process: response to stimulus (GO:0050896);; biological process: biological regula…	--
BMK_Unigene_012955	CAMK_CAMKL-CHK1	PK	20.5398	13.0819	12.652	23.7078	13.2673	11.5573	0.720134	-0.274298	normal	0.921796	-0.133815	normal	0.785141	-0.532412	normal	0.699326	-0.661918	normal	[RTKL]	--	Molecular Function: protein serine/threonine kinase activity (GO:0004674);; Molecular Function: ATP binding (GO:0005524);; Cellular Component: vacuole (GO:0005773);; Biological Process: protein phosphorylation (GO:0006468);; Biological Process: signal transduction (GO:0007165);; Biological Process: response to pH (GO:0009268);;	--	[T]	Signal transduction mechanisms	Protein kinase domain;; Protein tyrosine kinase	CBL-interacting protein kinase 29 OS=Oryza sativa subsp. japonica (Rice) PE=2 SV=1	T	Signal transduction mechanisms	PREDICTED: CBL-interacting protein kinase 29-like [Setaria italica]	biological process: metabolic process (GO:0008152);; biological process: cellular process (GO:0009987);; molecular function: catalytic activity (GO:0003824);; molecular function: binding (GO:0005488);; cellular component: cell (GO:0005623);; cellular component: organelle (GO:0043226);; cellular component: cell part (GO:0044464);; biological process: signaling (GO:0023052);; biological process: si…	--
BMK_Unigene_013189	CAMK_CAMKL-CHK1	PK	4.39684	2.33266	3.29465	5.74443	3.44512	4.57947	0.354337	-0.734147	normal	0.981501	0.0234366	normal	0.751897	-0.482375	normal	0.704695	0.287796	normal	[RTKL]	--	Molecular Function: protein serine/threonine kinase activity (GO:0004674);; Molecular Function: ATP binding (GO:0005524);; Cellular Component: cytosol (GO:0005829);; Biological Process: protein phosphorylation (GO:0006468);; Biological Process: signal transduction (GO:0007165);; Biological Process: response to abscisic acid (GO:0009737);;	--	[T]	Signal transduction mechanisms	Protein kinase domain;; Protein tyrosine kinase;; NAF domain;; Kinase-like	CBL-interacting protein kinase 5 OS=Oryza sativa subsp. japonica (Rice) PE=2 SV=1	T	Signal transduction mechanisms	hypothetical protein SORBIDRAFT_03g002340 [Sorghum bicolor]	biological process: metabolic process (GO:0008152);; biological process: cellular process (GO:0009987);; molecular function: catalytic activity (GO:0003824);; molecular function: binding (GO:0005488);; cellular component: cell (GO:0005623);; cellular component: cell part (GO:0044464);; biological process: signaling (GO:0023052);; biological process: single-organism process (GO:0044699);; biologic…	--
BMK_Unigene_014055	CAMK_CAMKL-CHK1	PK	3.34587	2.04654	1.99721	4.42757	1.44728	1.80182	0.790119	-0.321132	normal	0.877863	-0.230098	normal	0.436539	-1.20325	normal	0.571776	-0.853554	normal	[RTKL]	--	Molecular Function: protein serine/threonine kinase activity (GO:0004674);; Molecular Function: ATP binding (GO:0005524);; Biological Process: protein phosphorylation (GO:0006468);; Biological Process: signal transduction (GO:0007165);;	--	[T]	Signal transduction mechanisms	Protein kinase domain;; Protein tyrosine kinase	CBL-interacting protein kinase 19 GN=P0022D06.5 OS=Oryza sativa subsp. japonica (Rice) PE=1 SV=1	T	Signal transduction mechanisms	PREDICTED: CBL-interacting protein kinase 19-like [Setaria italica]	biological process: metabolic process (GO:0008152);; biological process: cellular process (GO:0009987);; molecular function: catalytic activity (GO:0003824);; molecular function: binding (GO:0005488);; biological process: signaling (GO:0023052);; biological process: single-organism process (GO:0044699);; biological process: response to stimulus (GO:0050896);; biological process: biological regula…	--
BMK_Unigene_014831	CAMK_CAMKL-CHK1	PK	8.88739	8.74111	7.89662	6.60587	8.1131	6.63662	0.60326	0.306262	normal	0.65547	0.306132	normal	0.589312	0.533646	normal	0.678352	0.32251	normal	[RTKL]	--	Molecular Function: protein serine/threonine kinase activity (GO:0004674);; Molecular Function: ATP binding (GO:0005524);; Biological Process: protein phosphorylation (GO:0006468);; Biological Process: negative regulation of abscisic acid-activated signaling pathway (GO:0009788);; Cellular Component: membrane (GO:0016020);;	--	[T]	Signal transduction mechanisms	Protein kinase domain;; Protein tyrosine kinase;; NAF domain;; Kinase-like	CBL-interacting protein kinase 26 OS=Oryza sativa subsp. japonica (Rice) PE=2 SV=1	T	Signal transduction mechanisms	PREDICTED: CBL-interacting protein kinase 26-like [Setaria italica]	biological process: metabolic process (GO:0008152);; biological process: cellular process (GO:0009987);; molecular function: catalytic activity (GO:0003824);; molecular function: binding (GO:0005488);; biological process: biological regulation (GO:0065007);; cellular component: membrane (GO:0016020)	--
BMK_Unigene_016237	CAMK_CAMKL-CHK1	PK	20.3818	53.7007	110.883	26.013	51.2225	60.8289	2.18464e-05	1.75881	up	2.20834e-08	2.94458	up	0.0437305	1.2068	normal	7.6124e-05	1.55995	up	[RTKL]	--	Molecular Function: protein serine/threonine kinase activity (GO:0004674);; Molecular Function: protein tyrosine kinase activity (GO:0004713);; Molecular Function: ATP binding (GO:0005524);; Cellular Component: plasma membrane (GO:0005886);; Biological Process: protein phosphorylation (GO:0006468);; Biological Process: signal transduction (GO:0007165);; Biological Process: response to salt stress…	K07198|0|sita:101781756|CBL-interacting protein kinase 1-like; K07198 5'-AMP-activated protein kinase, catalytic alpha subunit [EC:2.7.11.11] (A)	[T]	Signal transduction mechanisms	Protein kinase domain;; Protein tyrosine kinase;; NAF domain;; Kinase-like	CBL-interacting protein kinase 1 GN=P0706B05.31 OS=Oryza sativa subsp. japonica (Rice) PE=2 SV=1	T	Signal transduction mechanisms	PREDICTED: CBL-interacting protein kinase 1-like [Setaria italica]	biological process: metabolic process (GO:0008152);; biological process: cellular process (GO:0009987);; molecular function: catalytic activity (GO:0003824);; biological process: single-organism process (GO:0044699);; molecular function: binding (GO:0005488);; cellular component: cell (GO:0005623);; cellular component: membrane (GO:0016020);; cellular component: cell part (GO:0044464);; biologica…	Regulation of autophagy (ko04140)
BMK_Unigene_016792	CAMK_CAMKL-CHK1	PK	19.8912	10.2085	7.82171	31.4297	9.12651	13.2955	0.442766	-0.576667	normal	0.446784	-0.761815	normal	0.200898	-1.4002	normal	0.133935	-0.854418	normal	[RTKL]	--	Molecular Function: protein serine/threonine kinase activity (GO:0004674);; Molecular Function: ATP binding (GO:0005524);; Biological Process: protein phosphorylation (GO:0006468);; Biological Process: signal transduction (GO:0007165);;	K12761|0|sita:101779470|CBL-interacting protein kinase 25-like (A)	[T]	Signal transduction mechanisms	Protein kinase domain;; Protein tyrosine kinase;; NAF domain;; Kinase-like;; Lipopolysaccharide kinase (Kdo/WaaP) family	CBL-interacting protein kinase 25 OS=Oryza sativa subsp. japonica (Rice) PE=2 SV=1	T	Signal transduction mechanisms	PREDICTED: CBL-interacting protein kinase 25-like [Setaria italica]	biological process: metabolic process (GO:0008152);; biological process: cellular process (GO:0009987);; molecular function: catalytic activity (GO:0003824);; molecular function: binding (GO:0005488);; biological process: signaling (GO:0023052);; biological process: single-organism process (GO:0044699);; biological process: response to stimulus (GO:0050896);; biological process: biological regula…	--
BMK_Unigene_017496	CAMK_CAMKL-CHK1	PK	62.7495	44.8334	30.1269	83.7228	74.9518	26.4819	0.936269	-0.0841886	normal	0.447514	-0.679096	normal	0.957079	0.138906	normal	0.202536	-1.24174	normal	[RTKL]	--	Molecular Function: protein serine/threonine kinase activity (GO:0004674);; Molecular Function: ATP binding (GO:0005524);; Biological Process: protein phosphorylation (GO:0006468);; Biological Process: signal transduction (GO:0007165);;	--	[T]	Signal transduction mechanisms	Protein kinase domain;; Protein tyrosine kinase;; NAF domain;; Kinase-like	CBL-interacting protein kinase 10 GN=CIPK10 OS=Oryza sativa subsp. japonica (Rice) PE=2 SV=1	T	Signal transduction mechanisms	PREDICTED: CBL-interacting protein kinase 10-like isoform X1 [Setaria italica]	biological process: metabolic process (GO:0008152);; biological process: cellular process (GO:0009987);; molecular function: catalytic activity (GO:0003824);; molecular function: binding (GO:0005488);; biological process: signaling (GO:0023052);; biological process: single-organism process (GO:0044699);; biological process: response to stimulus (GO:0050896);; biological process: biological regula…	--
BMK_Unigene_017875	CAMK_CAMKL-CHK1	PK	59.5379	41.7638	29.0373	78.4938	68.5623	24.4728	0.169064	-0.762147	normal	0.650012	-0.416511	normal	0.751897	-0.583273	normal	0.122202	-1.70808	normal	[RTKL]	--	Molecular Function: protein serine/threonine kinase activity (GO:0004674);; Molecular Function: ATP binding (GO:0005524);; Biological Process: protein phosphorylation (GO:0006468);; Biological Process: signal transduction (GO:0007165);;	--	[T]	Signal transduction mechanisms	Protein kinase domain;; Protein tyrosine kinase;; NAF domain;; Kinase-like	CBL-interacting protein kinase 10 GN=CIPK10 OS=Oryza sativa subsp. japonica (Rice) PE=2 SV=1	T	Signal transduction mechanisms	PREDICTED: CBL-interacting protein kinase 10-like isoform X1 [Setaria italica]	biological process: metabolic process (GO:0008152);; biological process: cellular process (GO:0009987);; molecular function: catalytic activity (GO:0003824);; molecular function: binding (GO:0005488);; biological process: signaling (GO:0023052);; biological process: single-organism process (GO:0044699);; biological process: response to stimulus (GO:0050896);; biological process: biological regula…	--
BMK_Unigene_018144	CAMK_CAMKL-CHK1	PK	18.161	18.7996	22.766	14.7238	24.1386	29.5837	0.559764	0.426671	normal	0.437695	0.802159	normal	0.148471	0.966746	normal	5.80762e-06	1.3679	up	[RTKL]	--	Molecular Function: protein serine/threonine kinase activity (GO:0004674);; Molecular Function: ATP binding (GO:0005524);; Cellular Component: mitochondrion (GO:0005739);; Biological Process: protein phosphorylation (GO:0006468);; Biological Process: signal transduction (GO:0007165);; Cellular Component: cytoplasmic membrane-bounded vesicle (GO:0016023);;	--	[T]	Signal transduction mechanisms	Protein kinase domain;; Protein tyrosine kinase;; NAF domain;; Kinase-like;; Protein kinase domain	CBL-interacting protein kinase 31 OS=Oryza sativa subsp. japonica (Rice) PE=1 SV=1	T	Signal transduction mechanisms	CIPK-like protein 1 [Zea mays]	biological process: metabolic process (GO:0008152);; biological process: cellular process (GO:0009987);; molecular function: catalytic activity (GO:0003824);; molecular function: binding (GO:0005488);; cellular component: cell (GO:0005623);; cellular component: organelle (GO:0043226);; cellular component: cell part (GO:0044464);; biological process: signaling (GO:0023052);; biological process: si…	--
BMK_Unigene_019334	CAMK_CAMKL-CHK1	PK	47.2868	44.3953	34.4145	56.829	35.0491	25.8982	0.60326	0.280847	normal	0.97972	0.0243082	normal	0.751897	-0.428785	normal	0.356276	-0.75933	normal	[RTKL]	--	Molecular Function: protein serine/threonine kinase activity (GO:0004674);; Molecular Function: ATP binding (GO:0005524);; Biological Process: protein phosphorylation (GO:0006468);; Biological Process: signal transduction (GO:0007165);;	--	[T]	Signal transduction mechanisms	Protein kinase domain;; Protein tyrosine kinase;; NAF domain;; Kinase-like	CBL-interacting protein kinase 2 OS=Oryza sativa subsp. japonica (Rice) PE=2 SV=1	T	Signal transduction mechanisms	PREDICTED: CBL-interacting protein kinase 2-like isoform X1 [Setaria italica]	biological process: metabolic process (GO:0008152);; biological process: cellular process (GO:0009987);; molecular function: catalytic activity (GO:0003824);; molecular function: binding (GO:0005488);; biological process: signaling (GO:0023052);; biological process: single-organism process (GO:0044699);; biological process: response to stimulus (GO:0050896);; biological process: biological regula…	--
BMK_Unigene_030518	CAMK_CAMKL-CHK1	PK	1.73669	1.25292	6.08673	0.0950116	1.52653	5.78766	0.979473	-0.0593836	normal	0.145778	2.11519	normal	0.0865429	2.99523	normal	1.3997e-07	5.20631	up	[RTKL]	--	Molecular Function: protein serine/threonine kinase activity (GO:0004674);; Molecular Function: ATP binding (GO:0005524);; Biological Process: protein phosphorylation (GO:0006468);; Biological Process: signal transduction (GO:0007165);;	--	[T]	Signal transduction mechanisms	Protein kinase domain;; Protein tyrosine kinase	Putative CBL-interacting protein kinase 13 OS=Oryza sativa subsp. japonica (Rice) PE=3 SV=1	T	Signal transduction mechanisms	PREDICTED: putative CBL-interacting protein kinase 13-like [Setaria italica]	biological process: metabolic process (GO:0008152);; biological process: cellular process (GO:0009987);; molecular function: catalytic activity (GO:0003824);; molecular function: binding (GO:0005488);; biological process: signaling (GO:0023052);; biological process: single-organism process (GO:0044699);; biological process: response to stimulus (GO:0050896);; biological process: biological regula…	--
BMK_Unigene_030631	CAMK_CAMKL-CHK1	PK	0.342346	0	0	0.554628	0.32399	0.417463	0.450698	-2.30903	normal	0.532236	-2.11884	normal	0.947569	-0.288844	normal	0.98566	-0.0455269	normal	[RTKL]	--	Molecular Function: protein serine/threonine kinase activity (GO:0004674);; Molecular Function: ATP binding (GO:0005524);; Biological Process: protein phosphorylation (GO:0006468);;	K07198|1.29366e-13|gsl:Gasu_35670|serine/threonine protein kinase isoform 1 (EC:2.7.11.1); K07198 5'-AMP-activated protein kinase, catalytic alpha subunit [EC:2.7.11.11] (A)	[T]	Signal transduction mechanisms	Protein kinase domain;; Protein tyrosine kinase	CBL-interacting protein kinase 23 GN=OJ1027_G06.32 OS=Oryza sativa subsp. japonica (Rice) PE=2 SV=1	T	Signal transduction mechanisms	hypothetical protein COCHEDRAFT_1202128 [Bipolaris maydis C5]	biological process: metabolic process (GO:0008152);; biological process: cellular process (GO:0009987);; molecular function: catalytic activity (GO:0003824);; molecular function: binding (GO:0005488)	--
BMK_Unigene_035133	CAMK_CAMKL-CHK1	PK	2.79987	2.00353	6.76471	0.660099	1.80128	4.2814	0.984812	-0.0411499	normal	0.598948	1.43097	normal	0.751897	1.42213	normal	0.274791	2.06273	normal	[RTKL]	--	Molecular Function: protein serine/threonine kinase activity (GO:0004674);; Molecular Function: ATP binding (GO:0005524);; Biological Process: protein phosphorylation (GO:0006468);; Biological Process: signal transduction (GO:0007165);;	--	[T]	Signal transduction mechanisms	Protein kinase domain;; Protein tyrosine kinase;; NAF domain;; Kinase-like	CBL-interacting protein kinase 22 GN=OSJNBa0049D13.5 OS=Oryza sativa subsp. japonica (Rice) PE=2 SV=1	T	Signal transduction mechanisms	PREDICTED: CBL-interacting protein kinase 22-like [Setaria italica]	biological process: metabolic process (GO:0008152);; biological process: cellular process (GO:0009987);; molecular function: catalytic activity (GO:0003824);; molecular function: binding (GO:0005488);; biological process: signaling (GO:0023052);; biological process: single-organism process (GO:0044699);; biological process: response to stimulus (GO:0050896);; biological process: biological regula…	--
BMK_Unigene_041117	CAMK_CAMKL-CHK1	PK	16.0402	11.0449	9.01265	14.1105	10.5036	7.54567	0.714855	0.319482	normal	0.987812	0.0215014	normal	0.994067	0.0182856	normal	0.465302	-1.33524	normal	[RTKL]	--	Molecular Function: protein serine/threonine kinase activity (GO:0004674);; Molecular Function: ATP binding (GO:0005524);; Cellular Component: vacuole (GO:0005773);; Biological Process: protein phosphorylation (GO:0006468);; Biological Process: signal transduction (GO:0007165);; Biological Process: response to pH (GO:0009268);;	--	[T]	Signal transduction mechanisms	Protein kinase domain;; Protein tyrosine kinase;; NAF domain;; Kinase-like	CBL-interacting protein kinase 29 OS=Oryza sativa subsp. japonica (Rice) PE=2 SV=1	T	Signal transduction mechanisms	PREDICTED: CBL-interacting protein kinase 29-like [Setaria italica]	biological process: metabolic process (GO:0008152);; biological process: cellular process (GO:0009987);; molecular function: catalytic activity (GO:0003824);; molecular function: binding (GO:0005488);; cellular component: cell (GO:0005623);; cellular component: organelle (GO:0043226);; cellular component: cell part (GO:0044464);; biological process: signaling (GO:0023052);; biological process: si…	--
BMK_Unigene_042657	CAMK_CAMKL-CHK1	PK	2.00498	0.738879	0.75681	0.0149725	0	0.0737495	0.381574	-1.02393	normal	0.650012	-0.847538	normal	--	--	--	0.699326	1.25525	normal	[RTKL]	--	Molecular Function: protein serine/threonine kinase activity (GO:0004674);; Molecular Function: ATP binding (GO:0005524);; Biological Process: protein phosphorylation (GO:0006468);; Biological Process: signal transduction (GO:0007165);;	--	[T]	Signal transduction mechanisms	Protein kinase domain;; Protein tyrosine kinase;; NAF domain;; Kinase-like	CBL-interacting protein kinase 23 GN=OJ1027_G06.32 OS=Oryza sativa subsp. japonica (Rice) PE=2 SV=1	T	Signal transduction mechanisms	hypothetical protein PHYSODRAFT_350499 [Phytophthora sojae]	biological process: metabolic process (GO:0008152);; biological process: cellular process (GO:0009987);; molecular function: catalytic activity (GO:0003824);; molecular function: binding (GO:0005488);; biological process: signaling (GO:0023052);; biological process: single-organism process (GO:0044699);; biological process: response to stimulus (GO:0050896);; biological process: biological regula…	--
BMK_Unigene_045041	CAMK_CAMKL-CHK1	PK	0.977499	1.046	0.545877	0.462902	0.368748	0.456653	0.869832	0.399149	normal	0.933056	-0.282345	normal	0.994633	-0.0210041	normal	0.953859	0.221674	normal	[RTKL]	--	Molecular Function: protein serine/threonine kinase activity (GO:0004674);; Molecular Function: ATP binding (GO:0005524);; Biological Process: protein phosphorylation (GO:0006468);; Biological Process: negative regulation of abscisic acid-activated signaling pathway (GO:0009788);; Cellular Component: membrane (GO:0016020);;	K07198|4.06052e-44|sita:101776111|CBL-interacting protein kinase 11-like; K07198 5'-AMP-activated protein kinase, catalytic alpha subunit [EC:2.7.11.11] (A)	[T]	Signal transduction mechanisms	Protein kinase domain;; Protein tyrosine kinase;; Lipopolysaccharide kinase (Kdo/WaaP) family	CBL-interacting protein kinase 11 GN=P0031D02.33-1 OS=Oryza sativa subsp. japonica (Rice) PE=2 SV=1	T	Signal transduction mechanisms	CBL-interacting protein kinase [Saccharum hybrid cultivar Yacheng05-179]	biological process: metabolic process (GO:0008152);; biological process: cellular process (GO:0009987);; molecular function: catalytic activity (GO:0003824);; molecular function: binding (GO:0005488);; biological process: biological regulation (GO:0065007);; cellular component: membrane (GO:0016020)	Regulation of autophagy (ko04140)
BMK_Unigene_045680	CAMK_CAMKL-CHK1	PK	80.8525	124.731	90.7594	103.001	156.511	80.3412	0.0538667	0.992892	normal	0.650012	0.379232	normal	0.305384	1.19374	normal	0.699326	-0.367475	normal	[RTKL]	--	Biological Process: cytokinesis by cell plate formation (GO:0000911);; Molecular Function: protein serine/threonine kinase activity (GO:0004674);; Molecular Function: ATP binding (GO:0005524);; Cellular Component: nucleus (GO:0005634);; Cellular Component: mitochondrion (GO:0005739);; Cellular Component: cytosol (GO:0005829);; Cellular Component: plasma membrane (GO:0005886);; Biological Process:…	--	[T]	Signal transduction mechanisms	Protein kinase domain;; Protein tyrosine kinase;; Kinase-like;; Lipopolysaccharide kinase (Kdo/WaaP) family;; NAF domain	CBL-interacting protein kinase 23 GN=OJ1027_G06.32 OS=Oryza sativa subsp. japonica (Rice) PE=2 SV=1	T	Signal transduction mechanisms	PREDICTED: CBL-interacting protein kinase 23-like [Oryza brachyantha]	biological process: cellular process (GO:0009987);; biological process: single-organism process (GO:0044699);; biological process: metabolic process (GO:0008152);; molecular function: catalytic activity (GO:0003824);; molecular function: binding (GO:0005488);; cellular component: cell (GO:0005623);; cellular component: organelle (GO:0043226);; cellular component: cell part (GO:0044464);; cellular…	--
BMK_Unigene_046115	CAMK_CAMKL-CHK1	PK	38.5858	9.49443	12.5253	28.6583	15.2372	6.339	0.770333	-0.425119	normal	0.501987	-1.14052	normal	0.913338	-0.350947	normal	0.759991	0.431551	normal	[RTKL]	--	Molecular Function: protein serine/threonine kinase activity (GO:0004674);; Molecular Function: ATP binding (GO:0005524);; Cellular Component: mitochondrion (GO:0005739);; Biological Process: protein phosphorylation (GO:0006468);; Biological Process: signal transduction (GO:0007165);;	--	[T]	Signal transduction mechanisms	Protein kinase domain;; Protein tyrosine kinase	CBL-interacting protein kinase 7 OS=Oryza sativa subsp. japonica (Rice) PE=2 SV=1	T	Signal transduction mechanisms	CBL-interacting protein kinase 04 [Sorghum bicolor]	biological process: metabolic process (GO:0008152);; biological process: cellular process (GO:0009987);; molecular function: catalytic activity (GO:0003824);; molecular function: binding (GO:0005488);; cellular component: cell (GO:0005623);; cellular component: organelle (GO:0043226);; cellular component: cell part (GO:0044464);; biological process: signaling (GO:0023052);; biological process: si…	--
BMK_Unigene_046178	CAMK_CAMKL-CHK1	PK	9.32119	7.08933	12.4934	8.38555	9.77194	8.89573	0.964192	-0.0712287	normal	0.329971	1.05884	normal	0.751897	0.626263	normal	0.769863	0.395261	normal	[RTKL]	--	Molecular Function: protein serine/threonine kinase activity (GO:0004674);; Molecular Function: ATP binding (GO:0005524);; Cellular Component: plasma membrane (GO:0005886);; Biological Process: protein phosphorylation (GO:0006468);; Biological Process: signal transduction (GO:0007165);; Cellular Component: plastid (GO:0009536);; Biological Process: response to salt stress (GO:0009651);; Biologica…	K07198|0|sita:101754539|CBL-interacting protein kinase 21-like; K07198 5'-AMP-activated protein kinase, catalytic alpha subunit [EC:2.7.11.11] (A)	[T]	Signal transduction mechanisms	Protein kinase domain;; Protein tyrosine kinase;; NAF domain;; DYW family of nucleic acid deaminases	CBL-interacting protein kinase 21 GN=OJ1136_D11.123 OS=Oryza sativa subsp. japonica (Rice) PE=2 SV=2	T	Signal transduction mechanisms	PREDICTED: CBL-interacting protein kinase 21-like [Setaria italica]	biological process: metabolic process (GO:0008152);; biological process: cellular process (GO:0009987);; molecular function: catalytic activity (GO:0003824);; molecular function: binding (GO:0005488);; cellular component: cell (GO:0005623);; cellular component: membrane (GO:0016020);; cellular component: cell part (GO:0044464);; biological process: signaling (GO:0023052);; biological process: sin…	Regulation of autophagy (ko04140)
BMK_Unigene_049313	CAMK_CAMKL-CHK1	PK	100.014	185.81	226.831	118.25	176.216	277.005	0.0553972	0.970092	normal	0.0072153	1.24186	up	0.582566	0.700873	normal	0.00114909	1.42748	up	[RTKL]	--	Molecular Function: protein serine/threonine kinase activity (GO:0004674);; Molecular Function: ATP binding (GO:0005524);; Biological Process: protein phosphorylation (GO:0006468);; Biological Process: negative regulation of abscisic acid-activated signaling pathway (GO:0009788);;	--	[T]	Signal transduction mechanisms	Protein kinase domain;; Protein tyrosine kinase;; NAF domain;; Kinase-like	CBL-interacting protein kinase 14 GN=OsJ_031406 OS=Oryza sativa subsp. japonica (Rice) PE=2 SV=1	T	Signal transduction mechanisms	uncharacterized protein LOC101766857 [Setaria italica]	biological process: metabolic process (GO:0008152);; biological process: cellular process (GO:0009987);; molecular function: catalytic activity (GO:0003824);; molecular function: binding (GO:0005488);; biological process: biological regulation (GO:0065007)	--
BMK_Unigene_056909	CAMK_CAMKL-CHK1	PK	0.605928	0	0	0.562933	0	0	0.111224	-3.6743	normal	0.153577	-3.47247	normal	0.207858	-2.80048	normal	0.128134	-2.88662	normal	[RTKL]	--	Molecular Function: protein kinase activity (GO:0004672);; Molecular Function: ATP binding (GO:0005524);; Biological Process: protein phosphorylation (GO:0006468);; Biological Process: response to stimulus (GO:0050896);;	--	[T]	Signal transduction mechanisms	Protein kinase domain;; Protein tyrosine kinase;; Lipopolysaccharide kinase (Kdo/WaaP) family;; Protein kinase domain	CBL-interacting serine/threonine-protein kinase 5 GN=T30N20.200 OS=Arabidopsis thaliana (Mouse-ear cress) PE=2 SV=1	T	Signal transduction mechanisms	predicted protein [Hordeum vulgare subsp. vulgare]	biological process: metabolic process (GO:0008152);; biological process: cellular process (GO:0009987);; molecular function: catalytic activity (GO:0003824);; molecular function: binding (GO:0005488);; biological process: response to stimulus (GO:0050896)	--
BMK_Unigene_059628	CAMK_CAMKL-CHK1	PK	0	0	0	0	0.0897444	0	--	--	--	--	--	--	--	--	--	--	--	--	[RTKL]	--	Molecular Function: protein serine/threonine kinase activity (GO:0004674);; Molecular Function: ATP binding (GO:0005524);; Biological Process: protein phosphorylation (GO:0006468);;	K08796|7.57149e-28|gsl:Gasu_10050|serine/threonine protein kinase (EC:2.7.11.1); K08796 BR serine/threonine kinase [EC:2.7.11.1] (A)	[D]	Cell cycle control, cell division, chromosome partitioning	Protein kinase domain;; Protein tyrosine kinase	CBL-interacting protein kinase 26 OS=Oryza sativa subsp. japonica (Rice) PE=2 SV=1	T	Signal transduction mechanisms	Pkinase-domain-containing protein [Auricularia delicata TFB-10046 SS5]	biological process: metabolic process (GO:0008152);; biological process: cellular process (GO:0009987);; molecular function: catalytic activity (GO:0003824);; molecular function: binding (GO:0005488)	--
BMK_Unigene_067087	CAMK_CAMKL-CHK1	PK	0.609182	0	0	0	0	0	0.60326	-1.63327	normal	0.650012	-1.5061	normal	--	--	--	--	--	--	[RTKL]	--	Molecular Function: protein serine/threonine kinase activity (GO:0004674);; Molecular Function: ATP binding (GO:0005524);; Cellular Component: plasma membrane (GO:0005886);; Biological Process: protein phosphorylation (GO:0006468);; Biological Process: signal transduction (GO:0007165);; Biological Process: response to salt stress (GO:0009651);; Cellular Component: plant-type vacuole membrane (GO:…	--	[T]	Signal transduction mechanisms	Protein kinase domain;; Protein tyrosine kinase	CBL-interacting serine/threonine-protein kinase 24 OS=Arabidopsis thaliana (Mouse-ear cress) PE=1 SV=1	T	Signal transduction mechanisms	CBLinteracting serine/threonineprotein kinase putati [Albugo laibachii Nc14]	biological process: metabolic process (GO:0008152);; biological process: cellular process (GO:0009987);; molecular function: catalytic activity (GO:0003824);; molecular function: binding (GO:0005488);; cellular component: cell (GO:0005623);; cellular component: membrane (GO:0016020);; cellular component: cell part (GO:0044464);; biological process: signaling (GO:0023052);; biological process: sin…	--
BMK_Unigene_070975	CAMK_CAMKL-CHK1	PK	1.06698	0.446005	0.0454602	0.362533	0.15781	0.378325	0.60326	-0.820542	normal	0.042771	-3.35063	normal	0.751897	-0.727243	normal	0.877943	0.361369	normal	[RTKL]	--	Molecular Function: protein serine/threonine kinase activity (GO:0004674);; Molecular Function: ATP binding (GO:0005524);; Biological Process: protein phosphorylation (GO:0006468);; Biological Process: signal transduction (GO:0007165);;	K07198|0|sita:101786950|CBL-interacting protein kinase 18-like; K07198 5'-AMP-activated protein kinase, catalytic alpha subunit [EC:2.7.11.11] (A)	[T]	Signal transduction mechanisms	Protein kinase domain;; NAF domain;; Protein tyrosine kinase	CBL-interacting protein kinase 18 OS=Oryza sativa subsp. japonica (Rice) PE=2 SV=1	T	Signal transduction mechanisms	PREDICTED: CBL-interacting protein kinase 18-like isoform X1 [Setaria italica]	biological process: metabolic process (GO:0008152);; biological process: cellular process (GO:0009987);; molecular function: catalytic activity (GO:0003824);; molecular function: binding (GO:0005488);; biological process: signaling (GO:0023052);; biological process: single-organism process (GO:0044699);; biological process: response to stimulus (GO:0050896);; biological process: biological regula…	Regulation of autophagy (ko04140)
BMK_Unigene_071069	CAMK_CAMKL-CHK1	PK	0.114457	0	1.44524	0	0	0.268897	0.613943	-1.2798	normal	0.182682	3.04576	normal	--	--	--	0.583367	1.50951	normal	[RTKL]	--	Molecular Function: protein serine/threonine kinase activity (GO:0004674);; Molecular Function: ATP binding (GO:0005524);; Cellular Component: cytosol (GO:0005829);; Biological Process: protein phosphorylation (GO:0006468);; Biological Process: negative regulation of abscisic acid-activated signaling pathway (GO:0009788);; Cellular Component: membrane (GO:0016020);;	--	[T]	Signal transduction mechanisms	Protein kinase domain;; Protein tyrosine kinase	CBL-interacting protein kinase 11 GN=P0031D02.33-1 OS=Oryza sativa subsp. japonica (Rice) PE=2 SV=1	T	Signal transduction mechanisms	hypothetical protein SORBIDRAFT_09g023365 [Sorghum bicolor]	biological process: metabolic process (GO:0008152);; biological process: cellular process (GO:0009987);; molecular function: catalytic activity (GO:0003824);; molecular function: binding (GO:0005488);; cellular component: cell (GO:0005623);; cellular component: cell part (GO:0044464);; biological process: biological regulation (GO:0065007);; cellular component: membrane (GO:0016020)	--
BMK_Unigene_081676	CAMK_CAMKL-CHK1	PK	0.0440349	0.164775	0.0721982	2.43215	0.368681	0.165868	0.610051	1.41542	normal	0.829941	0.712305	normal	0.614412	-1.67994	normal	0.0288468	-2.85282	normal	[RTKL]	--	Molecular Function: nucleotide binding (GO:0000166);; Molecular Function: protein kinase activity (GO:0004672);; Biological Process: phosphorylation (GO:0016310);;	--	[T]	Signal transduction mechanisms	Protein kinase domain;; Protein tyrosine kinase	CBL-interacting serine/threonine-protein kinase 26 GN=F13M11 OS=Arabidopsis thaliana (Mouse-ear cress) PE=1 SV=2	T	Signal transduction mechanisms	CBL-interacting serine/threonine-protein kinase, putative [Phytophthora infestans T30-4]	molecular function: binding (GO:0005488);; biological process: metabolic process (GO:0008152);; biological process: cellular process (GO:0009987);; molecular function: catalytic activity (GO:0003824)	--
BMK_Unigene_082274	CAMK_CAMKL-CHK1	PK	2.9591	1.98069	6.8743	0.63361	1.7603	4.71403	0.613943	-1.28814	normal	0.65547	-1.18206	normal	0.751897	0.924937	normal	0.0757756	3.18481	normal	[RTKL]	--	Molecular Function: protein serine/threonine kinase activity (GO:0004674);; Molecular Function: ATP binding (GO:0005524);; Biological Process: protein phosphorylation (GO:0006468);; Biological Process: signal transduction (GO:0007165);;	--	[T]	Signal transduction mechanisms	Protein kinase domain;; Protein tyrosine kinase;; NAF domain;; Kinase-like	CBL-interacting protein kinase 22 GN=OSJNBa0049D13.5 OS=Oryza sativa subsp. japonica (Rice) PE=2 SV=1	T	Signal transduction mechanisms	PREDICTED: CBL-interacting protein kinase 22-like [Setaria italica]	biological process: metabolic process (GO:0008152);; biological process: cellular process (GO:0009987);; molecular function: catalytic activity (GO:0003824);; molecular function: binding (GO:0005488);; biological process: signaling (GO:0023052);; biological process: single-organism process (GO:0044699);; biological process: response to stimulus (GO:0050896);; biological process: biological regula…	--
BMK_Unigene_083877	CAMK_CAMKL-CHK1	PK	0	0	0	0	0	0.096901	--	--	--	--	--	--	--	--	--	--	--	--	[RTKL]	--	Molecular Function: protein serine/threonine kinase activity (GO:0004674);; Molecular Function: ATP binding (GO:0005524);; Cellular Component: cytosol (GO:0005829);; Biological Process: protein phosphorylation (GO:0006468);; Biological Process: signal transduction (GO:0007165);; Biological Process: response to abscisic acid (GO:0009737);;	K07198|4.68994e-52|sita:101786950|CBL-interacting protein kinase 18-like; K07198 5'-AMP-activated protein kinase, catalytic alpha subunit [EC:2.7.11.11] (A)	[T]	Signal transduction mechanisms	Protein kinase domain;; Protein tyrosine kinase	CBL-interacting protein kinase 18 OS=Oryza sativa subsp. japonica (Rice) PE=2 SV=1	--	--	PREDICTED: CBL-interacting protein kinase 18-like isoform X2 [Setaria italica]	biological process: metabolic process (GO:0008152);; biological process: cellular process (GO:0009987);; molecular function: catalytic activity (GO:0003824);; molecular function: binding (GO:0005488);; cellular component: cell (GO:0005623);; cellular component: cell part (GO:0044464);; biological process: signaling (GO:0023052);; biological process: single-organism process (GO:0044699);; biologic…	Regulation of autophagy (ko04140)
BMK_Unigene_084755	CAMK_CAMKL-CHK1	PK	18.4167	13.1578	10.5699	14.8641	11.2376	10.2162	0.847251	0.180059	normal	0.992857	-0.0109076	normal	0.996298	0.00995533	normal	0.789554	0.425022	normal	[RTKL]	--	Molecular Function: protein serine/threonine kinase activity (GO:0004674);; Molecular Function: ATP binding (GO:0005524);; Cellular Component: vacuole (GO:0005773);; Biological Process: protein phosphorylation (GO:0006468);; Biological Process: signal transduction (GO:0007165);; Biological Process: response to pH (GO:0009268);;	--	[T]	Signal transduction mechanisms	Protein kinase domain;; Protein tyrosine kinase;; NAF domain;; Kinase-like	CBL-interacting protein kinase 29 OS=Oryza sativa subsp. japonica (Rice) PE=2 SV=1	--	--	PREDICTED: CBL-interacting protein kinase 29-like [Setaria italica]	biological process: metabolic process (GO:0008152);; biological process: cellular process (GO:0009987);; molecular function: catalytic activity (GO:0003824);; molecular function: binding (GO:0005488);; cellular component: cell (GO:0005623);; cellular component: organelle (GO:0043226);; cellular component: cell part (GO:0044464);; biological process: signaling (GO:0023052);; biological process: si…	--
BMK_Unigene_085959	CAMK_CAMKL-CHK1	PK	11.7365	5.81529	3.88071	10.9511	7.15658	5.64131	0.567362	-0.917348	normal	0.0597055	-2.29241	normal	0.561399	-1.11388	normal	0.699326	-0.638274	normal	[RTKL]	--	Molecular Function: protein serine/threonine kinase activity (GO:0004674);; Molecular Function: ATP binding (GO:0005524);; Cellular Component: mitochondrion (GO:0005739);; Biological Process: protein phosphorylation (GO:0006468);; Biological Process: signal transduction (GO:0007165);; Biological Process: response to salt stress (GO:0009651);; Cellular Component: plant-type vacuole membrane (GO:00…	--	[T]	Signal transduction mechanisms	Protein kinase domain;; Protein tyrosine kinase;; NAF domain;; Kinase-like;; Kinase associated domain 1	CBL-interacting protein kinase 24 OS=Oryza sativa subsp. japonica (Rice) PE=1 SV=1	--	--	hypothetical protein SORBIDRAFT_10g023680 [Sorghum bicolor]	biological process: metabolic process (GO:0008152);; biological process: cellular process (GO:0009987);; molecular function: catalytic activity (GO:0003824);; molecular function: binding (GO:0005488);; cellular component: cell (GO:0005623);; cellular component: organelle (GO:0043226);; cellular component: cell part (GO:0044464);; biological process: signaling (GO:0023052);; biological process: si…	--
BMK_Unigene_090759	CAMK_CAMKL-CHK1	PK	97.9419	186.862	226.965	115.198	174.759	271.78	0.0015727	1.50319	up	0.000295584	1.8181	up	0.202752	0.982511	normal	2.9331e-05	1.58212	up	[RTKL]	--	Molecular Function: protein serine/threonine kinase activity (GO:0004674);; Molecular Function: ATP binding (GO:0005524);; Biological Process: protein phosphorylation (GO:0006468);; Biological Process: negative regulation of abscisic acid-activated signaling pathway (GO:0009788);;	--	[T]	Signal transduction mechanisms	Protein kinase domain;; Protein tyrosine kinase;; NAF domain;; Kinase-like	CBL-interacting protein kinase 14 GN=OsJ_031406 OS=Oryza sativa subsp. japonica (Rice) PE=2 SV=1	T	Signal transduction mechanisms	uncharacterized protein LOC101766857 [Setaria italica]	biological process: metabolic process (GO:0008152);; biological process: cellular process (GO:0009987);; molecular function: catalytic activity (GO:0003824);; molecular function: binding (GO:0005488);; biological process: biological regulation (GO:0065007)	--
BMK_Unigene_090809	CAMK_CAMKL-CHK1	PK	3.85045	4.8595	2.53406	5.28348	3.57923	1.78121	0.875203	0.458899	normal	0.975399	0.101096	normal	0.751897	1.19368	normal	0.972123	0.108504	normal	[RTKL]	--	Molecular Function: protein serine/threonine kinase activity (GO:0004674);; Molecular Function: ATP binding (GO:0005524);; Biological Process: protein phosphorylation (GO:0006468);; Biological Process: negative regulation of abscisic acid-activated signaling pathway (GO:0009788);; Cellular Component: membrane (GO:0016020);;	--	[T]	Signal transduction mechanisms	NAF domain;; Protein kinase domain;; Protein tyrosine kinase	CBL-interacting protein kinase 11 GN=P0031D02.33-1 OS=Oryza sativa subsp. japonica (Rice) PE=2 SV=1	S	Function unknown	PREDICTED: uncharacterized protein LOC101776514 [Setaria italica]	biological process: metabolic process (GO:0008152);; biological process: cellular process (GO:0009987);; molecular function: catalytic activity (GO:0003824);; molecular function: binding (GO:0005488);; biological process: biological regulation (GO:0065007);; cellular component: membrane (GO:0016020)	--
BMK_Unigene_091397	CAMK_CAMKL-CHK1	PK	112.617	175.284	127.813	146.706	218.81	115.76	0.0220998	1.16847	normal	0.53836	0.587931	normal	0.435388	0.81362	normal	0.699326	0.362998	normal	[RTKL]	--	Biological Process: cytokinesis by cell plate formation (GO:0000911);; Molecular Function: protein serine/threonine kinase activity (GO:0004674);; Molecular Function: ATP binding (GO:0005524);; Cellular Component: nucleus (GO:0005634);; Cellular Component: mitochondrion (GO:0005739);; Cellular Component: cytosol (GO:0005829);; Cellular Component: plasma membrane (GO:0005886);; Biological Process:…	--	[T]	Signal transduction mechanisms	Protein kinase domain;; Protein tyrosine kinase;; NAF domain;; Kinase-like	CBL-interacting protein kinase 23 GN=OJ1027_G06.32 OS=Oryza sativa subsp. japonica (Rice) PE=2 SV=1	T	Signal transduction mechanisms	unknown [Zea mays]	biological process: cellular process (GO:0009987);; biological process: single-organism process (GO:0044699);; biological process: metabolic process (GO:0008152);; molecular function: catalytic activity (GO:0003824);; molecular function: binding (GO:0005488);; cellular component: cell (GO:0005623);; cellular component: organelle (GO:0043226);; cellular component: cell part (GO:0044464);; cellular…	--
BMK_Unigene_099156	CAMK_CAMKL-CHK1	PK	0	0.304994	0.0949635	0	0	0	0.60326	1.68336	normal	--	--	--	--	--	--	--	--	--	[RTKL]	--	Molecular Function: protein serine/threonine kinase activity (GO:0004674);; Molecular Function: ATP binding (GO:0005524);; Biological Process: protein phosphorylation (GO:0006468);;	--	[T]	Signal transduction mechanisms	Protein kinase domain;; Protein tyrosine kinase	CBL-interacting serine/threonine-protein kinase 11 GN=At2g30360 OS=Arabidopsis thaliana (Mouse-ear cress) PE=1 SV=1	T	Signal transduction mechanisms	serine/threonine-protein kinase srk1 [Verticillium alfalfae VaMs.102]	biological process: metabolic process (GO:0008152);; biological process: cellular process (GO:0009987);; molecular function: catalytic activity (GO:0003824);; molecular function: binding (GO:0005488)	--
BMK_Unigene_105277	CAMK_CAMKL-CHK1	PK	0	0	0	0	0.175411	0	--	--	--	--	--	--	0.751897	0.797908	normal	--	--	--	[RTKL]	--	Molecular Function: kinase activity (GO:0016301);;	K07198|2.31984e-16|ccp:CHC_T00009300001|SNF1-related serine threonine protein kinase catalytic subunit alpha KIN10; K07198 5'-AMP-activated protein kinase, catalytic alpha subunit [EC:2.7.11.11] (A)	[R]	General function prediction only	Protein kinase domain;; Protein tyrosine kinase	SNF1-related protein kinase catalytic subunit alpha KIN10 GN=At3g01090 OS=Arabidopsis thaliana (Mouse-ear cress) PE=1 SV=2	T	Signal transduction mechanisms	CAMK protein kinase [Phytophthora parasitica]	biological process: metabolic process (GO:0008152);; biological process: cellular process (GO:0009987);; molecular function: catalytic activity (GO:0003824)	--
BMK_Unigene_107739	CAMK_CAMKL-CHK1	PK	0.285552	0.750427	0.211591	0	0.426439	0	0.60326	1.31878	normal	0.987066	0.0533967	normal	0.62681	1.73895	normal	--	--	--	[RTKL]	--	Molecular Function: protein serine/threonine kinase activity (GO:0004674);; Molecular Function: ATP binding (GO:0005524);; Biological Process: protein phosphorylation (GO:0006468);;	--	[D]	Cell cycle control, cell division, chromosome partitioning	Protein kinase domain;; Protein tyrosine kinase	CBL-interacting serine/threonine-protein kinase 12 GN=F28A21.110 OS=Arabidopsis thaliana (Mouse-ear cress) PE=1 SV=1	T	Signal transduction mechanisms	putative hal protein kinase protein [Togninia minima UCRPA7]	biological process: metabolic process (GO:0008152);; biological process: cellular process (GO:0009987);; molecular function: catalytic activity (GO:0003824);; molecular function: binding (GO:0005488)	--
BMK_Unigene_021878	CAMK_CAMKL-LKB	PK	0	0	0.218947	0	0	0.202468	--	--	--	0.650012	1.43022	normal	--	--	--	0.699326	0.883547	normal	[RTKL]	--	Molecular Function: protein serine/threonine kinase activity (GO:0004674);; Molecular Function: ATP binding (GO:0005524);; Biological Process: protein phosphorylation (GO:0006468);;	K07359|2.603e-09|cvr:CHLNCDRAFT_22362|hypothetical protein; K07359 calcium/calmodulin-dependent protein kinase kinase [EC:2.7.11.17] (A)	[T]	Signal transduction mechanisms	Protein kinase domain	Serine/threonine-protein kinase GRIK2 GN=MUF9.18 OS=Arabidopsis thaliana (Mouse-ear cress) PE=1 SV=1	T	Signal transduction mechanisms	hypothetical protein CGLO_07688 [Colletotrichum gloeosporioides Cg-14]	biological process: metabolic process (GO:0008152);; biological process: cellular process (GO:0009987);; molecular function: catalytic activity (GO:0003824);; molecular function: binding (GO:0005488)	--
BMK_Unigene_041248	CAMK_CAMKL-LKB	PK	0	0.349864	0	0	0	0.269979	0.448521	2.32127	normal	--	--	--	--	--	--	0.654934	1.29986	normal	[RTKL]	--	Molecular Function: protein serine/threonine kinase activity (GO:0004674);; Molecular Function: ATP binding (GO:0005524);; Biological Process: protein phosphorylation (GO:0006468);;	K07359|1.08348e-10|smo:SELMODRAFT_119400|hypothetical protein; K07359 calcium/calmodulin-dependent protein kinase kinase [EC:2.7.11.17] (A)	[T]	Signal transduction mechanisms	Protein kinase domain;; Protein tyrosine kinase	Serine/threonine-protein kinase GRIK1 OS=Arabidopsis thaliana (Mouse-ear cress) PE=1 SV=1	T	Signal transduction mechanisms	hypothetical protein CGLO_07688 [Colletotrichum gloeosporioides Cg-14]	biological process: metabolic process (GO:0008152);; biological process: cellular process (GO:0009987);; molecular function: catalytic activity (GO:0003824);; molecular function: binding (GO:0005488)	--
BMK_Unigene_048582	CAMK_CAMKL-LKB	PK	18.2756	15.4036	15.0241	15.7492	15.7305	17.6155	0.405216	0.608378	normal	0.695088	0.324203	normal	0.977812	-0.0667384	normal	0.385777	0.629318	normal	[RTKL]	--	Molecular Function: protein serine/threonine kinase activity (GO:0004674);; Molecular Function: protein tyrosine kinase activity (GO:0004713);; Molecular Function: ATP binding (GO:0005524);; Biological Process: protein phosphorylation (GO:0006468);; Biological Process: phosphatidylinositol phosphorylation (GO:0046854);; Biological Process: phosphatidylinositol-mediated signaling (GO:0048015);;	K07359|0|sita:101771684|serine/threonine-protein kinase GRIK1-like; K07359 calcium/calmodulin-dependent protein kinase kinase [EC:2.7.11.17] (A)	[T]	Signal transduction mechanisms	Protein kinase domain;; Protein tyrosine kinase;; Kinase-like	Serine/threonine-protein kinase GRIK2 GN=MUF9.18 OS=Arabidopsis thaliana (Mouse-ear cress) PE=1 SV=1	T	Signal transduction mechanisms	PREDICTED: serine/threonine-protein kinase GRIK1-like isoform X1 [Setaria italica]	biological process: metabolic process (GO:0008152);; biological process: cellular process (GO:0009987);; molecular function: catalytic activity (GO:0003824);; biological process: single-organism process (GO:0044699);; molecular function: binding (GO:0005488);; biological process: signaling (GO:0023052);; biological process: response to stimulus (GO:0050896);; biological process: biological regula…	--
BMK_Unigene_079090	CAMK_CAMKL-LKB	PK	0.100829	0.251182	0.0303836	2.92967	0.156116	0	0.613943	1.24186	normal	0.836203	-0.697642	normal	0.0937254	-2.89643	normal	2.4858e-06	-5.81321	down	[RTKL]	--	Molecular Function: protein serine/threonine kinase activity (GO:0004674);; Molecular Function: ATP binding (GO:0005524);; Biological Process: protein phosphorylation (GO:0006468);;	K07359|2.38505e-36|olu:OSTLU_39356|hypothetical protein; K07359 calcium/calmodulin-dependent protein kinase kinase [EC:2.7.11.17] (A)	[T]	Signal transduction mechanisms	Protein kinase domain;; Protein tyrosine kinase;; Kinase-like	CBL-interacting serine/threonine-protein kinase 8 GN=T22A6.230 OS=Arabidopsis thaliana (Mouse-ear cress) PE=1 SV=1	T	Signal transduction mechanisms	hypothetical protein PHYSODRAFT_555042 [Phytophthora sojae]	biological process: metabolic process (GO:0008152);; biological process: cellular process (GO:0009987);; molecular function: catalytic activity (GO:0003824);; molecular function: binding (GO:0005488)	--
BMK_Unigene_086368	CAMK_CAMKL-LKB	PK	16.9816	12.9922	13.5761	13.6242	14.757	15.1086	0.399057	-1.64409	normal	0.953953	-0.142787	normal	0.993445	-0.0220199	normal	0.699326	0.579948	normal	[RTKL]	--	Molecular Function: protein serine/threonine kinase activity (GO:0004674);; Molecular Function: protein tyrosine kinase activity (GO:0004713);; Molecular Function: ATP binding (GO:0005524);; Biological Process: protein phosphorylation (GO:0006468);; Biological Process: phosphatidylinositol phosphorylation (GO:0046854);; Biological Process: phosphatidylinositol-mediated signaling (GO:0048015);;	K07359|4.70779e-172|sita:101771684|serine/threonine-protein kinase GRIK1-like; K07359 calcium/calmodulin-dependent protein kinase kinase [EC:2.7.11.17] (A)	[T]	Signal transduction mechanisms	Protein kinase domain;; Protein tyrosine kinase;; Kinase-like	Serine/threonine-protein kinase GRIK1 OS=Arabidopsis thaliana (Mouse-ear cress) PE=1 SV=1	T	Signal transduction mechanisms	PREDICTED: serine/threonine-protein kinase GRIK1-like isoform X1 [Setaria italica]	biological process: metabolic process (GO:0008152);; biological process: cellular process (GO:0009987);; molecular function: catalytic activity (GO:0003824);; biological process: single-organism process (GO:0044699);; molecular function: binding (GO:0005488);; biological process: signaling (GO:0023052);; biological process: response to stimulus (GO:0050896);; biological process: biological regula…	--
BMK_Unigene_104800	CAMK_CAMKL-LKB	PK	0.1499	0.153124	0	0.664853	0	0	0.969412	0.152813	normal	0.65547	-1.17449	normal	0.751897	-1.14665	normal	0.613332	-1.43175	normal	[RTKL]	--	--	--	[T]	Signal transduction mechanisms	Protein kinase domain;; Protein tyrosine kinase	SNF1-related protein kinase catalytic subunit alpha KIN11 GN=MXE2.16 OS=Arabidopsis thaliana (Mouse-ear cress) PE=1 SV=1	T	Signal transduction mechanisms	serine/threonine protein kinase [Galdieria sulphuraria]	--	--
BMK_Unigene_000463	CAMK_CDPK	PK	0.172867	4.31935	0.125089	0.114402	0.0803002	0.0474957	2.56837e-06	4.6388	up	0.998942	0.00465101	normal	0.987016	-0.0848764	normal	0.912101	-0.340128	normal	[RTKL]	--	--	K08794|8.86652e-66|vcn:VOLCADRAFT_79621|hypothetical protein; K08794 calcium/calmodulin-dependent protein kinase I [EC:2.7.11.17] (A)	[T]	Signal transduction mechanisms	Protein kinase domain;; Protein tyrosine kinase;; Kinase-like;; Lipopolysaccharide kinase (Kdo/WaaP) family	Calcium-dependent protein kinase isoform 2 GN=P0048D08.112 OS=Oryza sativa subsp. japonica (Rice) PE=2 SV=2	T	Signal transduction mechanisms	calcium/calmodulin-dependent kinase type I [Rhizoctonia solani AG-3 Rhs1AP]	--	--
BMK_Unigene_004210	CAMK_CDPK	PK	4.92165	10.558	3.2972	0.0432147	1.93134	0.0601142	0.106335	1.45736	normal	0.974409	-0.0518289	normal	0.0164665	3.76752	normal	0.962909	0.181703	normal	[RTKL]	--	Molecular Function: protein serine/threonine kinase activity (GO:0004674);; Molecular Function: ATP binding (GO:0005524);; Biological Process: protein phosphorylation (GO:0006468);;	K07198|1.00513e-28|sita:101776111|CBL-interacting protein kinase 11-like; K07198 5'-AMP-activated protein kinase, catalytic alpha subunit [EC:2.7.11.11] (A)	[T]	Signal transduction mechanisms	Protein kinase domain;; Protein tyrosine kinase	CBL-interacting protein kinase 11 GN=P0031D02.33-1 OS=Oryza sativa subsp. japonica (Rice) PE=2 SV=1	T	Signal transduction mechanisms	hypothetical protein [Podospora anserina S mat+]	biological process: metabolic process (GO:0008152);; biological process: cellular process (GO:0009987);; molecular function: catalytic activity (GO:0003824);; molecular function: binding (GO:0005488)	Regulation of autophagy (ko04140)
BMK_Unigene_008483	CAMK_CDPK	PK	21.0986	9.91776	16.6607	22.3267	15.8677	24.1795	0.157095	-0.748247	normal	0.836945	0.212379	normal	0.842557	-0.209044	normal	0.289058	0.496387	normal	[RTKL]	--	Molecular Function: protein serine/threonine kinase activity (GO:0004674);; Molecular Function: protein tyrosine kinase activity (GO:0004713);; Molecular Function: calcium ion binding (GO:0005509);; Molecular Function: ATP binding (GO:0005524);; Cellular Component: mitochondrion (GO:0005739);; Biological Process: protein phosphorylation (GO:0006468);;	K13412|0|sita:101770198|calcium-dependent protein kinase 5-like; K13412 calcium-dependent protein kinase [EC:2.7.11.1] (A)	[T]	Signal transduction mechanisms	Protein kinase domain;; EF hand;; Protein tyrosine kinase;; EF-hand domain pair;; EF-hand domain;; EF-hand domain pair;; EF hand;; Lipopolysaccharide kinase (Kdo/WaaP) family	Calcium-dependent protein kinase 5 GN=CPK5 OS=Arabidopsis thaliana (Mouse-ear cress) PE=2 SV=1	T	Signal transduction mechanisms	PREDICTED: calcium-dependent protein kinase 5-like [Setaria italica]	biological process: metabolic process (GO:0008152);; biological process: cellular process (GO:0009987);; molecular function: catalytic activity (GO:0003824);; biological process: single-organism process (GO:0044699);; molecular function: binding (GO:0005488);; cellular component: cell (GO:0005623);; cellular component: organelle (GO:0043226);; cellular component: cell part (GO:0044464)	Plant-pathogen interaction (ko04626)
BMK_Unigene_008489	CAMK_CDPK	PK	0.444943	0.540595	0.777255	0.00752131	0	2.43959	0.750443	0.595357	normal	0.636229	1.21914	normal	--	--	--	0.00268195	4.52672	up	[RTKL]	--	Molecular Function: protein serine/threonine kinase activity (GO:0004674);; Molecular Function: ATP binding (GO:0005524);; Biological Process: protein phosphorylation (GO:0006468);;	--	[T]	Signal transduction mechanisms	Protein kinase domain;; Protein tyrosine kinase;; Kinase-like	Putative CBL-interacting protein kinase 27 GN=P0701F11.10 OS=Oryza sativa subsp. japonica (Rice) PE=3 SV=1	T	Signal transduction mechanisms	serine/threonine-protein kinase ksp1 [Verticillium dahliae VdLs.17]	biological process: metabolic process (GO:0008152);; biological process: cellular process (GO:0009987);; molecular function: catalytic activity (GO:0003824);; molecular function: binding (GO:0005488)	--
BMK_Unigene_008758	CAMK_CDPK	PK	4.49022	3.40674	4.22735	3.10182	3.51055	2.33289	0.972457	-0.024427	normal	0.580916	0.432731	normal	0.751897	0.447806	normal	0.975647	-0.0272407	normal	[RTKL]	--	Molecular Function: protein serine/threonine kinase activity (GO:0004674);; Molecular Function: ATP binding (GO:0005524);; Biological Process: protein phosphorylation (GO:0006468);;	--	[T]	Signal transduction mechanisms	Protein kinase domain;; Protein kinase domain;; Protein tyrosine kinase	Serine/threonine-protein kinase PEPKR2 GN=PEPKR2 OS=Arabidopsis thaliana (Mouse-ear cress) PE=2 SV=1	--	--	hypothetical protein SORBIDRAFT_02g027060 [Sorghum bicolor]	biological process: metabolic process (GO:0008152);; biological process: cellular process (GO:0009987);; molecular function: catalytic activity (GO:0003824);; molecular function: binding (GO:0005488)	--
BMK_Unigene_009792	CAMK_CDPK	PK	8.83068	3.94024	3.27425	3.38867	3.08035	1.5942	0.496537	-0.765904	normal	0.563846	-0.833509	normal	0.967052	0.139108	normal	0.71104	-0.588698	normal	--	--	Molecular Function: protein serine/threonine kinase activity (GO:0004674);; Molecular Function: ATP binding (GO:0005524);; Biological Process: protein phosphorylation (GO:0006468);; Biological Process: cellular response to phosphate starvation (GO:0016036);;	--	[T]	Signal transduction mechanisms	Protein kinase domain;; Protein tyrosine kinase	Calcium-dependent protein kinase 17 GN=CPK17 OS=Arabidopsis thaliana (Mouse-ear cress) PE=2 SV=1	T	Signal transduction mechanisms	PREDICTED: phosphoenolpyruvate carboxylase kinase 1-like isoform X1 [Setaria italica]	biological process: metabolic process (GO:0008152);; biological process: cellular process (GO:0009987);; molecular function: catalytic activity (GO:0003824);; molecular function: binding (GO:0005488);; biological process: single-organism process (GO:0044699);; biological process: response to stimulus (GO:0050896)	--
BMK_Unigene_010305	CAMK_CDPK	PK	25.0505	30.1578	20.9568	20.8747	25.4291	19.7013	0.155056	0.6189	normal	0.691647	0.23387	normal	0.608865	0.558426	normal	0.699326	0.293075	normal	[RTKL]	--	Molecular Function: calmodulin-dependent protein kinase activity (GO:0004683);; Molecular Function: calcium ion binding (GO:0005509);; Molecular Function: ATP binding (GO:0005524);; Cellular Component: plasma membrane (GO:0005886);; Biological Process: protein autophosphorylation (GO:0046777);;	K13412|0|sita:101772409|calcium-dependent protein kinase 13-like; K13412 calcium-dependent protein kinase [EC:2.7.11.1] (A)	[T]	Signal transduction mechanisms	Protein kinase domain;; EF hand;; EF-hand domain pair;; EF-hand domain pair;; EF-hand domain;; EF hand;; Protein tyrosine kinase;; Kinase-like;; Cytoskeletal-regulatory complex EF hand;; Secreted protein acidic and rich in cysteine Ca binding region	Calcium-dependent protein kinase 13 GN=CPK13 OS=Arabidopsis thaliana (Mouse-ear cress) PE=1 SV=2	T	Signal transduction mechanisms	PREDICTED: calcium-dependent protein kinase 13-like, partial [Setaria italica]	biological process: metabolic process (GO:0008152);; biological process: cellular process (GO:0009987);; molecular function: catalytic activity (GO:0003824);; molecular function: binding (GO:0005488);; cellular component: cell (GO:0005623);; cellular component: membrane (GO:0016020);; cellular component: cell part (GO:0044464)	Plant-pathogen interaction (ko04626)
BMK_Unigene_010319	CAMK_CDPK	PK	34.5754	12.4678	12.0076	29.3586	9.9805	9.95765	0.060783	-1.08163	normal	0.0676742	-0.998206	normal	0.0434921	-1.22351	normal	0.00214202	-1.15484	down	[RTKL]	--	Molecular Function: protein serine/threonine kinase activity (GO:0004674);; Molecular Function: ATP binding (GO:0005524);; Biological Process: protein autophosphorylation (GO:0046777);;	--	[T]	Signal transduction mechanisms	Protein kinase domain;; Protein tyrosine kinase	Calcium-dependent protein kinase 3 GN=F9D16.120 OS=Arabidopsis thaliana (Mouse-ear cress) PE=1 SV=1	T	Signal transduction mechanisms	PREDICTED: calcium-dependent protein kinase 34-like [Setaria italica]	biological process: metabolic process (GO:0008152);; biological process: cellular process (GO:0009987);; molecular function: catalytic activity (GO:0003824);; molecular function: binding (GO:0005488)	--
BMK_Unigene_010320	CAMK_CDPK	PK	28.1578	8.17182	13.5334	27.3688	9.91428	7.35071	0.0161211	-1.38483	normal	0.528705	-0.534532	normal	0.0944182	-1.1293	normal	0.00146949	-1.47162	down	[RTKL]	--	Molecular Function: protein serine/threonine kinase activity (GO:0004674);; Molecular Function: ATP binding (GO:0005524);; Biological Process: protein autophosphorylation (GO:0046777);;	--	[T]	Signal transduction mechanisms	Protein kinase domain;; Protein tyrosine kinase	Calcium-dependent protein kinase 17 GN=CPK17 OS=Arabidopsis thaliana (Mouse-ear cress) PE=2 SV=1	T	Signal transduction mechanisms	PREDICTED: calcium-dependent protein kinase 34-like [Setaria italica]	biological process: metabolic process (GO:0008152);; biological process: cellular process (GO:0009987);; molecular function: catalytic activity (GO:0003824);; molecular function: binding (GO:0005488)	--
BMK_Unigene_011094	CAMK_CDPK	PK	6.3251	0.34717	0.765457	3.66206	1.51131	1.59588	9.80162e-09	-3.54767	down	3.72441e-05	-2.35247	down	0.470041	-0.908401	normal	0.547203	-0.635401	normal	[RTKL]	--	Molecular Function: protein serine/threonine kinase activity (GO:0004674);; Molecular Function: calcium ion binding (GO:0005509);; Molecular Function: ATP binding (GO:0005524);; Biological Process: protein phosphorylation (GO:0006468);;	--	[T]	Signal transduction mechanisms	Protein kinase domain;; Protein tyrosine kinase;; Lipopolysaccharide kinase (Kdo/WaaP) family	CDPK-related kinase 5 GN=T20E23.130 OS=Arabidopsis thaliana (Mouse-ear cress) PE=2 SV=1	T	Signal transduction mechanisms	PREDICTED: CDPK-related kinase 5-like [Setaria italica]	biological process: metabolic process (GO:0008152);; biological process: cellular process (GO:0009987);; molecular function: catalytic activity (GO:0003824);; molecular function: binding (GO:0005488)	--
BMK_Unigene_013087	CAMK_CDPK	PK	27.5461	16.5511	19.3943	28.9538	20.9409	21.9102	0.60326	-0.355123	normal	0.985149	0.0158048	normal	0.857621	-0.194383	normal	0.976486	-0.0219823	normal	[RTKL]	--	Molecular Function: protein serine/threonine kinase activity (GO:0004674);; Molecular Function: calcium ion binding (GO:0005509);; Molecular Function: ATP binding (GO:0005524);; Biological Process: protein phosphorylation (GO:0006468);; Cellular Component: membrane (GO:0016020);; Biological Process: starch biosynthetic process (GO:0019252);;	K13412|2.47158e-83|sita:101774986|calcium-dependent protein kinase isoform 1-like; K13412 calcium-dependent protein kinase [EC:2.7.11.1] (A)	[T]	Signal transduction mechanisms	Protein kinase domain;; Protein tyrosine kinase	Calcium-dependent protein kinase isoform 1 GN=OSJNBb0064P21.2 OS=Oryza sativa subsp. japonica (Rice) PE=2 SV=2	T	Signal transduction mechanisms	PREDICTED: calcium-dependent protein kinase isoform 1-like [Setaria italica]	biological process: metabolic process (GO:0008152);; biological process: cellular process (GO:0009987);; molecular function: catalytic activity (GO:0003824);; molecular function: binding (GO:0005488);; cellular component: membrane (GO:0016020);; biological process: single-organism process (GO:0044699)	Plant-pathogen interaction (ko04626)
BMK_Unigene_014654	CAMK_CDPK	PK	2.52278	0.789128	0.362409	0.029358	0	0	0.661186	-1.02189	normal	0.108753	-2.13197	normal	0.751897	-0.804111	normal	0.699326	-0.872999	normal	[RTKL]	--	Molecular Function: binding (GO:0005488);; Molecular Function: kinase activity (GO:0016301);;	--	[T]	Signal transduction mechanisms	Protein kinase domain;; Protein tyrosine kinase;; Kinase-like;; Lipopolysaccharide kinase (Kdo/WaaP) family;; PH domain	Calcium-dependent protein kinase 7 GN=CPK7 OS=Arabidopsis thaliana (Mouse-ear cress) PE=2 SV=1	--	--	hypothetical protein PHYSODRAFT_563553 [Phytophthora sojae]	molecular function: binding (GO:0005488);; biological process: metabolic process (GO:0008152);; biological process: cellular process (GO:0009987);; molecular function: catalytic activity (GO:0003824)	--
BMK_Unigene_014748	CAMK_CDPK	PK	1.46566	0.386318	0.295746	2.15279	1.49078	0.287167	0.322865	-1.44444	normal	0.294112	-1.64284	normal	0.918659	-0.239327	normal	0.0421904	-2.24326	normal	[RTKL]	--	Molecular Function: protein serine/threonine kinase activity (GO:0004674);; Molecular Function: calcium ion binding (GO:0005509);; Molecular Function: ATP binding (GO:0005524);; Cellular Component: plasma membrane (GO:0005886);; Biological Process: protein phosphorylation (GO:0006468);;	K13412|4.49786e-96|sita:101779715|calcium-dependent protein kinase 30-like; K13412 calcium-dependent protein kinase [EC:2.7.11.1] (A)	[T]	Signal transduction mechanisms	Protein kinase domain;; Protein tyrosine kinase	Calcium-dependent protein kinase 10 GN=F6A14.1 OS=Arabidopsis thaliana (Mouse-ear cress) PE=1 SV=1	--	--	PREDICTED: calcium-dependent protein kinase 30-like [Setaria italica]	biological process: metabolic process (GO:0008152);; biological process: cellular process (GO:0009987);; molecular function: catalytic activity (GO:0003824);; molecular function: binding (GO:0005488);; cellular component: cell (GO:0005623);; cellular component: membrane (GO:0016020);; cellular component: cell part (GO:0044464)	Plant-pathogen interaction (ko04626)
BMK_Unigene_015138	CAMK_CDPK	PK	32.3415	20.169	16.6065	20.6802	14.6026	22.396	0.60326	-0.302362	normal	0.493395	-0.442067	normal	0.838861	-0.219881	normal	0.499218	0.492075	normal	[RTKL]	--	Molecular Function: protein serine/threonine kinase activity (GO:0004674);; Molecular Function: calcium ion binding (GO:0005509);; Molecular Function: ATP binding (GO:0005524);; Biological Process: protein phosphorylation (GO:0006468);; Cellular Component: membrane (GO:0016020);; Biological Process: starch biosynthetic process (GO:0019252);;	K13412|9.18993e-162|sita:101774986|calcium-dependent protein kinase isoform 1-like; K13412 calcium-dependent protein kinase [EC:2.7.11.1] (A)	[T]	Signal transduction mechanisms	EF-hand domain pair;; EF hand;; Protein kinase domain;; EF-hand domain;; EF-hand domain pair	Calcium-dependent protein kinase isoform 1 GN=OSJNBb0064P21.2 OS=Oryza sativa subsp. japonica (Rice) PE=2 SV=2	T	Signal transduction mechanisms	PREDICTED: calcium-dependent protein kinase isoform 1-like [Setaria italica]	biological process: metabolic process (GO:0008152);; biological process: cellular process (GO:0009987);; molecular function: catalytic activity (GO:0003824);; molecular function: binding (GO:0005488);; cellular component: membrane (GO:0016020);; biological process: single-organism process (GO:0044699)	Plant-pathogen interaction (ko04626)
BMK_Unigene_016138	CAMK_CDPK	PK	36.9243	40.9733	34.4798	56.6515	36.9866	37.2324	0.272292	0.523782	normal	0.542927	0.421302	normal	0.751897	-0.342231	normal	0.699326	-0.234785	normal	[RTKL]	--	Molecular Function: protein serine/threonine kinase activity (GO:0004674);; Molecular Function: calcium ion binding (GO:0005509);; Molecular Function: ATP binding (GO:0005524);; Cellular Component: plasma membrane (GO:0005886);; Biological Process: protein phosphorylation (GO:0006468);;	--	[T]	Signal transduction mechanisms	Protein kinase domain;; Protein tyrosine kinase;; Lipopolysaccharide kinase (Kdo/WaaP) family;; Phosphotransferase enzyme family	CDPK-related kinase 3 GN=T3A4.8 OS=Arabidopsis thaliana (Mouse-ear cress) PE=1 SV=1	T	Signal transduction mechanisms	PREDICTED: CDPK-related kinase 3-like [Setaria italica]	biological process: metabolic process (GO:0008152);; biological process: cellular process (GO:0009987);; molecular function: catalytic activity (GO:0003824);; molecular function: binding (GO:0005488);; cellular component: cell (GO:0005623);; cellular component: membrane (GO:0016020);; cellular component: cell part (GO:0044464)	--
BMK_Unigene_016766	CAMK_CDPK	PK	44.1121	25.6525	26.6523	37.6359	27.7233	26.1218	0.468555	-0.399521	normal	0.721005	-0.203474	normal	0.8781	-0.155197	normal	0.817157	-0.143128	normal	[RTKL]	--	Molecular Function: protein serine/threonine kinase activity (GO:0004674);; Molecular Function: calcium ion binding (GO:0005509);; Molecular Function: ATP binding (GO:0005524);; Biological Process: protein phosphorylation (GO:0006468);;	K13412|0|sbi:SORBI_02g003500|SORBIDRAFT_02g003500, Sb02g003500; hypothetical protein; K13412 calcium-dependent protein kinase [EC:2.7.11.1] (A)	[T]	Signal transduction mechanisms	Protein kinase domain;; EF hand;; EF-hand domain pair;; EF-hand domain;; EF-hand domain pair;; EF hand;; Protein tyrosine kinase;; Cytoskeletal-regulatory complex EF hand;; Lipopolysaccharide kinase (Kdo/WaaP) family	Calcium-dependent protein kinase 2 GN=CPK2 OS=Arabidopsis thaliana (Mouse-ear cress) PE=1 SV=1	T	Signal transduction mechanisms	PREDICTED: calcium-dependent protein kinase 1-like isoform X2 [Setaria italica]	biological process: metabolic process (GO:0008152);; biological process: cellular process (GO:0009987);; molecular function: catalytic activity (GO:0003824);; molecular function: binding (GO:0005488)	Plant-pathogen interaction (ko04626)
BMK_Unigene_017909	CAMK_CDPK	PK	16.8638	36.5444	30.09	26.8507	35.6227	21.8292	4.8262e-05	1.48183	up	0.000577709	1.3442	up	0.351466	0.670042	normal	0.920235	0.0737863	normal	[RTKL]	--	Molecular Function: calcium-dependent protein kinase C activity (GO:0004698);; Molecular Function: calcium ion binding (GO:0005509);; Molecular Function: ATP binding (GO:0005524);; Cellular Component: nucleus (GO:0005634);; Cellular Component: cytoplasm (GO:0005737);; Cellular Component: plasma membrane (GO:0005886);; Biological Process: protein phosphorylation (GO:0006468);; Biological Process: …	K13412|0|zma:100281687|cl51135_1; LOC100281687; K13412 calcium-dependent protein kinase [EC:2.7.11.1] (A)	[T]	Signal transduction mechanisms	Protein kinase domain;; EF hand;; EF-hand domain pair;; Protein tyrosine kinase;; EF-hand domain pair;; EF hand;; EF-hand domain;; Cytoskeletal-regulatory complex EF hand;; Kinase-like;; Lipopolysaccharide kinase (Kdo/WaaP) family;; Secreted protein acidic and rich in cysteine Ca binding region	Calcium-dependent protein kinase 7 GN=CPK7 OS=Arabidopsis thaliana (Mouse-ear cress) PE=2 SV=1	T	Signal transduction mechanisms	LOC100281687 [Zea mays]	biological process: metabolic process (GO:0008152);; biological process: cellular process (GO:0009987);; molecular function: catalytic activity (GO:0003824);; molecular function: binding (GO:0005488);; cellular component: cell (GO:0005623);; cellular component: organelle (GO:0043226);; cellular component: cell part (GO:0044464);; cellular component: membrane (GO:0016020);; biological process: res…	Plant-pathogen interaction (ko04626)
BMK_Unigene_022325	CAMK_CDPK	PK	0.100313	0	0	0	0	0	--	--	--	--	--	--	--	--	--	--	--	--	[RTKL]	--	Biological Process: MAPK cascade (GO:0000165);; Molecular Function: calmodulin-dependent protein kinase activity (GO:0004683);; Molecular Function: calcium-dependent protein kinase C activity (GO:0004698);; Molecular Function: calcium ion binding (GO:0005509);; Molecular Function: ATP binding (GO:0005524);; Cellular Component: nucleus (GO:0005634);; Cellular Component: cytoplasm (GO:0005737);; Ce…	K13412|5.84925e-37|bdi:100829958|calcium-dependent protein kinase 13-like; K13412 calcium-dependent protein kinase [EC:2.7.11.1] (A)	[T]	Signal transduction mechanisms	Protein kinase domain	Calcium-dependent protein kinase 10 GN=F6A14.1 OS=Arabidopsis thaliana (Mouse-ear cress) PE=1 SV=1	T	Signal transduction mechanisms	TPA: putative calcium-dependent protein kinase family protein [Zea mays]	biological process: metabolic process (GO:0008152);; biological process: cellular process (GO:0009987);; biological process: signaling (GO:0023052);; biological process: single-organism process (GO:0044699);; biological process: response to stimulus (GO:0050896);; biological process: biological regulation (GO:0065007);; molecular function: catalytic activity (GO:0003824);; molecular function: bin…	Plant-pathogen interaction (ko04626)
BMK_Unigene_026713	CAMK_CDPK	PK	1.75765	1.38988	1.45353	1.79503	0.834855	0.411607	0.981414	0.0475319	normal	0.94618	0.193779	normal	0.841673	-0.58762	normal	0.406973	-1.85596	normal	[RTKL]	--	Molecular Function: protein serine/threonine kinase activity (GO:0004674);; Molecular Function: calcium ion binding (GO:0005509);; Molecular Function: ATP binding (GO:0005524);; Cellular Component: plasma membrane (GO:0005886);; Biological Process: protein phosphorylation (GO:0006468);; Biological Process: positive regulation of abscisic acid-activated signaling pathway (GO:0009789);;	K13412|7.61931e-54|obr:102718965|calcium-dependent protein kinase SK5-like; K13412 calcium-dependent protein kinase [EC:2.7.11.1] (A)	[T]	Signal transduction mechanisms	Protein kinase domain	Calcium-dependent protein kinase SK5 OS=Glycine max (Soybean) PE=1 SV=1	Z	Cytoskeleton	PREDICTED: calcium-dependent protein kinase SK5-like, partial [Oryza brachyantha]	biological process: metabolic process (GO:0008152);; biological process: cellular process (GO:0009987);; molecular function: catalytic activity (GO:0003824);; molecular function: binding (GO:0005488);; cellular component: cell (GO:0005623);; cellular component: membrane (GO:0016020);; cellular component: cell part (GO:0044464);; biological process: biological regulation (GO:0065007)	Plant-pathogen interaction (ko04626)
BMK_Unigene_029983	CAMK_CDPK	PK	1.02557	1.73363	1.57496	3.98019	2.2956	0.710518	--	--	--	--	--	--	--	--	--	0.699326	0.884192	normal	[RTKL]	--	Molecular Function: protein serine/threonine kinase activity (GO:0004674);; Molecular Function: calcium ion binding (GO:0005509);; Molecular Function: ATP binding (GO:0005524);; Cellular Component: mitochondrion (GO:0005739);; Biological Process: protein phosphorylation (GO:0006468);;	K13412|1.28538e-35|pda:103695544|calcium-dependent protein kinase 1-like; K13412 calcium-dependent protein kinase [EC:2.7.11.1] (A)	[T]	Signal transduction mechanisms	Protein kinase domain;; Protein tyrosine kinase	Calcium-dependent protein kinase 5 GN=CPK5 OS=Solanum tuberosum (Potato) PE=2 SV=1	T	Signal transduction mechanisms	PREDICTED: calcium-dependent protein kinase 1-like isoform X2 [Elaeis guineensis]	biological process: metabolic process (GO:0008152);; biological process: cellular process (GO:0009987);; molecular function: catalytic activity (GO:0003824);; molecular function: binding (GO:0005488);; cellular component: cell (GO:0005623);; cellular component: organelle (GO:0043226);; cellular component: cell part (GO:0044464)	Plant-pathogen interaction (ko04626)
BMK_Unigene_034029	CAMK_CDPK	PK	3.5621	4.57621	3.23077	4.38818	3.2582	2.00843	0.58846	1.37988	normal	0.836203	-0.678617	normal	0.751897	1.04608	normal	0.784028	0.708232	normal	[RTKL]	--	Molecular Function: protein serine/threonine kinase activity (GO:0004674);; Molecular Function: calcium ion binding (GO:0005509);; Molecular Function: ATP binding (GO:0005524);; Biological Process: protein phosphorylation (GO:0006468);;	K13412|1.20663e-30|mus:103985312|calcium-dependent protein kinase 4-like; K13412 calcium-dependent protein kinase [EC:2.7.11.1] (A)	[T]	Signal transduction mechanisms	Protein kinase domain;; Lipopolysaccharide kinase (Kdo/WaaP) family	Calcium-dependent protein kinase 4 GN=CPK4 OS=Solanum tuberosum (Potato) PE=2 SV=1	T	Signal transduction mechanisms	PREDICTED: calcium-dependent protein kinase 26 [Nelumbo nucifera]	biological process: metabolic process (GO:0008152);; biological process: cellular process (GO:0009987);; molecular function: catalytic activity (GO:0003824);; molecular function: binding (GO:0005488)	Plant-pathogen interaction (ko04626)
BMK_Unigene_035112	CAMK_CDPK	PK	1.31265	3.97519	2.53847	0.834265	1.80039	1.75913	0.60326	1.4473	normal	--	--	--	0.44832	2.17353	normal	--	--	--	[RTKL]	--	Molecular Function: protein serine/threonine kinase activity (GO:0004674);; Molecular Function: ATP binding (GO:0005524);; Biological Process: protein phosphorylation (GO:0006468);; Biological Process: cellular response to phosphate starvation (GO:0016036);;	--	[T]	Signal transduction mechanisms	Protein kinase domain;; Protein tyrosine kinase	Phosphoenolpyruvate carboxylase kinase 1 GN=PPCK1 OS=Arabidopsis thaliana (Mouse-ear cress) PE=1 SV=1	T	Signal transduction mechanisms	PREDICTED: phosphoenolpyruvate carboxylase kinase 2-like [Setaria italica]	biological process: metabolic process (GO:0008152);; biological process: cellular process (GO:0009987);; molecular function: catalytic activity (GO:0003824);; molecular function: binding (GO:0005488);; biological process: single-organism process (GO:0044699);; biological process: response to stimulus (GO:0050896)	--
BMK_Unigene_037526	CAMK_CDPK	PK	1.98672	5.39558	1.38231	0.250386	0.0210626	1.38605	0.126023	1.58419	normal	0.90961	-0.197696	normal	--	--	--	0.124039	2.92942	normal	[RTKL]	--	Molecular Function: protein kinase activity (GO:0004672);; Molecular Function: ATP binding (GO:0005524);; Biological Process: protein phosphorylation (GO:0006468);;	--	[D]	Cell cycle control, cell division, chromosome partitioning	Protein kinase domain;; Protein tyrosine kinase;; Lipopolysaccharide kinase (Kdo/WaaP) family;; Phosphotransferase enzyme family	Calcium-dependent protein kinase 17 GN=CPK17 OS=Arabidopsis thaliana (Mouse-ear cress) PE=2 SV=1	T	Signal transduction mechanisms	CAMK protein kinase [Phytophthora parasitica P10297]	biological process: metabolic process (GO:0008152);; biological process: cellular process (GO:0009987);; molecular function: catalytic activity (GO:0003824);; molecular function: binding (GO:0005488)	--
BMK_Unigene_037853	CAMK_CDPK	PK	1.13006	1.27262	2.02707	0	0	0	0.642496	0.532973	normal	0.252429	1.28511	normal	--	--	--	--	--	--	[RTKL]	--	Molecular Function: protein serine/threonine kinase activity (GO:0004674);; Molecular Function: ATP binding (GO:0005524);; Biological Process: protein phosphorylation (GO:0006468);;	K12761|3.84237e-28|sot:102601836|CBL-interacting serine/threonine-protein kinase 11-like; K12761 carbon catabolite-derepressing protein kinase [EC:2.7.11.1] (A)	[T]	Signal transduction mechanisms	Protein kinase domain;; Protein tyrosine kinase	CBL-interacting serine/threonine-protein kinase 13 GN=F13P17.2 OS=Arabidopsis thaliana (Mouse-ear cress) PE=1 SV=2	T	Signal transduction mechanisms	hypothetical protein MYCTH_2299470 [Myceliophthora thermophila ATCC 42464]	biological process: metabolic process (GO:0008152);; biological process: cellular process (GO:0009987);; molecular function: catalytic activity (GO:0003824);; molecular function: binding (GO:0005488)	--
BMK_Unigene_039290	CAMK_CDPK	PK	1.48689	16.4218	2.20064	0	0	0	1.86236e-06	3.68396	up	0.650012	0.891489	normal	--	--	--	--	--	--	[RTKL]	--	Molecular Function: transferase activity, transferring phosphorus-containing groups (GO:0016772);;	K08794|7.69144e-44|vcn:VOLCADRAFT_79621|hypothetical protein; K08794 calcium/calmodulin-dependent protein kinase I [EC:2.7.11.17] (A)	[T]	Signal transduction mechanisms	Protein kinase domain;; Protein tyrosine kinase;; Kinase-like;; Lipopolysaccharide kinase (Kdo/WaaP) family;; RIO1 family	Serine/threonine-protein kinase PKZ1 {ECO:0000303|PubMed:15819621} OS=Phytophthora infestans (Potato late blight fungus) PE=1 SV=1	T	Signal transduction mechanisms	CAMK protein kinase [Phytophthora parasitica P1569]	biological process: metabolic process (GO:0008152);; molecular function: catalytic activity (GO:0003824)	--
BMK_Unigene_042069	CAMK_CDPK	PK	45.9839	23.8564	21.6533	39.573	40.6543	20.6804	0.613736	0.672394	normal	0.837878	-0.350355	normal	0.965165	-0.115673	normal	0.532173	-1.04672	normal	[RTKL]	--	Molecular Function: calmodulin-dependent protein kinase activity (GO:0004683);; Molecular Function: calcium ion binding (GO:0005509);; Molecular Function: ATP binding (GO:0005524);; Cellular Component: plasma membrane (GO:0005886);; Biological Process: protein phosphorylation (GO:0006468);;	K13412|0|sita:101784780|calcium-dependent protein kinase 28-like; K13412 calcium-dependent protein kinase [EC:2.7.11.1] (A)	[T]	Signal transduction mechanisms	Protein kinase domain;; Protein tyrosine kinase;; EF hand;; EF-hand domain pair;; EF hand;; EF-hand domain;; EF-hand domain pair;; Secreted protein acidic and rich in cysteine Ca binding region;; Kinase-like	Calcium-dependent protein kinase 16 GN=CPK16 OS=Arabidopsis thaliana (Mouse-ear cress) PE=3 SV=1	T	Signal transduction mechanisms	PREDICTED: calcium-dependent protein kinase 28-like [Setaria italica]	biological process: metabolic process (GO:0008152);; biological process: cellular process (GO:0009987);; molecular function: catalytic activity (GO:0003824);; molecular function: binding (GO:0005488);; cellular component: cell (GO:0005623);; cellular component: membrane (GO:0016020);; cellular component: cell part (GO:0044464)	Plant-pathogen interaction (ko04626)
BMK_Unigene_043055	CAMK_CDPK	PK	16.4064	54.5353	17.711	23.7415	39.4157	12.9567	9.14562e-11	2.09275	up	0.399281	0.62644	normal	0.681967	0.889279	normal	0.699326	-0.517761	normal	[RTKL]	--	Molecular Function: calcium-dependent protein kinase C activity (GO:0004698);; Molecular Function: calcium ion binding (GO:0005509);; Molecular Function: ATP binding (GO:0005524);; Cellular Component: nucleus (GO:0005634);; Cellular Component: cytoplasm (GO:0005737);; Cellular Component: plasma membrane (GO:0005886);; Biological Process: protein phosphorylation (GO:0006468);; Biological Process: …	K13412|0|sbi:SORBI_02g036730|SORBIDRAFT_02g036730, Sb02g036730; hypothetical protein; K13412 calcium-dependent protein kinase [EC:2.7.11.1] (A)	[T]	Signal transduction mechanisms	Protein kinase domain;; EF hand;; EF-hand domain pair;; EF-hand domain pair;; EF hand;; EF-hand domain;; Protein tyrosine kinase;; Secreted protein acidic and rich in cysteine Ca binding region;; Kinase-like	Calcium-dependent protein kinase 8 GN=F7K24.200 OS=Arabidopsis thaliana (Mouse-ear cress) PE=1 SV=1	T	Signal transduction mechanisms	hypothetical protein SORBIDRAFT_02g036730 [Sorghum bicolor]	biological process: metabolic process (GO:0008152);; biological process: cellular process (GO:0009987);; molecular function: catalytic activity (GO:0003824);; molecular function: binding (GO:0005488);; cellular component: cell (GO:0005623);; cellular component: organelle (GO:0043226);; cellular component: cell part (GO:0044464);; cellular component: membrane (GO:0016020);; biological process: res…	Plant-pathogen interaction (ko04626)
BMK_Unigene_044468	CAMK_CDPK	PK	40.7004	49.9527	37.3092	46.3715	61.2922	41.7486	0.701575	0.272844	normal	0.866015	0.168391	normal	0.754114	0.310771	normal	0.937386	0.0854135	normal	[RTKL]	--	Molecular Function: protein serine/threonine kinase activity (GO:0004674);; Molecular Function: calcium ion binding (GO:0005509);; Molecular Function: ATP binding (GO:0005524);; Cellular Component: plasma membrane (GO:0005886);; Biological Process: protein phosphorylation (GO:0006468);; Biological Process: positive regulation of abscisic acid-activated signaling pathway (GO:0009789);;	K13412|0|sbi:SORBI_05g004610|SORBIDRAFT_05g004610, Sb05g004610; hypothetical protein; K13412 calcium-dependent protein kinase [EC:2.7.11.1] (A)	[T]	Signal transduction mechanisms	Protein kinase domain;; EF hand;; EF-hand domain pair;; EF-hand domain;; EF hand;; EF-hand domain pair;; Protein tyrosine kinase;; Cytoskeletal-regulatory complex EF hand;; Kinase-like	Calcium-dependent protein kinase SK5 OS=Glycine max (Soybean) PE=1 SV=1	T	Signal transduction mechanisms	hypothetical protein SORBIDRAFT_05g004610 [Sorghum bicolor]	biological process: metabolic process (GO:0008152);; biological process: cellular process (GO:0009987);; molecular function: catalytic activity (GO:0003824);; molecular function: binding (GO:0005488);; cellular component: cell (GO:0005623);; cellular component: membrane (GO:0016020);; cellular component: cell part (GO:0044464);; biological process: biological regulation (GO:0065007)	Plant-pathogen interaction (ko04626)
BMK_Unigene_044581	CAMK_CDPK	PK	21.9785	21.5586	18.554	25.8996	27.0161	25.5101	0.641317	0.263379	normal	0.724816	0.247575	normal	0.751897	0.362206	normal	0.588132	0.374268	normal	[RTKL]	--	Molecular Function: calmodulin-dependent protein kinase activity (GO:0004683);; Molecular Function: calcium ion binding (GO:0005509);; Molecular Function: ATP binding (GO:0005524);; Cellular Component: plasma membrane (GO:0005886);; Biological Process: protein autophosphorylation (GO:0046777);;	K13412|0|sita:101763140|calcium-dependent protein kinase 13-like; K13412 calcium-dependent protein kinase [EC:2.7.11.1] (A)	[T]	Signal transduction mechanisms	Protein kinase domain;; EF hand;; EF-hand domain pair;; EF-hand domain pair;; EF-hand domain;; EF hand;; Protein tyrosine kinase;; Secreted protein acidic and rich in cysteine Ca binding region;; Cytoskeletal-regulatory complex EF hand	Calcium-dependent protein kinase 13 GN=CPK13 OS=Arabidopsis thaliana (Mouse-ear cress) PE=1 SV=2	T	Signal transduction mechanisms	PREDICTED: calcium-dependent protein kinase 13-like [Setaria italica]	biological process: metabolic process (GO:0008152);; biological process: cellular process (GO:0009987);; molecular function: catalytic activity (GO:0003824);; molecular function: binding (GO:0005488);; cellular component: cell (GO:0005623);; cellular component: membrane (GO:0016020);; cellular component: cell part (GO:0044464)	Plant-pathogen interaction (ko04626)
BMK_Unigene_047136	CAMK_CDPK	PK	5.17052	10.8483	3.47212	0.0325226	1.80589	0.0945724	0.60326	1.2052	normal	0.817161	-0.719035	normal	--	--	--	--	--	--	[RTKL]	--	Molecular Function: nucleotide binding (GO:0000166);; Molecular Function: protein kinase activity (GO:0004672);; Biological Process: phosphorylation (GO:0016310);;	--	[T]	Signal transduction mechanisms	Protein kinase domain;; Protein tyrosine kinase;; Phosphotransferase enzyme family	Calcium-dependent protein kinase 8 GN=F7K24.200 OS=Arabidopsis thaliana (Mouse-ear cress) PE=1 SV=1	T	Signal transduction mechanisms	hypothetical protein [Podospora anserina S mat+]	molecular function: binding (GO:0005488);; biological process: metabolic process (GO:0008152);; biological process: cellular process (GO:0009987);; molecular function: catalytic activity (GO:0003824)	--
BMK_Unigene_047280	CAMK_CDPK	PK	4.85011	3.81699	3.7927	4.55039	3.92092	3.72443	0.958618	0.0530184	normal	0.455932	0.618419	normal	0.987796	0.0237464	normal	0.471728	-0.702216	normal	[RTKL]	--	Molecular Function: protein serine/threonine kinase activity (GO:0004674);; Molecular Function: ATP binding (GO:0005524);; Biological Process: protein phosphorylation (GO:0006468);;	--	[T]	Signal transduction mechanisms	Protein kinase domain;; Protein tyrosine kinase;; Phosphotransferase enzyme family;; Protein kinase domain	Serine/threonine-protein kinase PEPKR2 GN=PEPKR2 OS=Arabidopsis thaliana (Mouse-ear cress) PE=2 SV=1	T	Signal transduction mechanisms	TPA: putative calcium-dependent protein kinase family protein isoform 1 [Zea mays]	biological process: metabolic process (GO:0008152);; biological process: cellular process (GO:0009987);; molecular function: catalytic activity (GO:0003824);; molecular function: binding (GO:0005488)	--
BMK_Unigene_048656	CAMK_CDPK	PK	1.0879	2.08523	1.17675	1.32393	1.12526	0.740034	0.272657	1.49385	normal	0.650012	0.891472	normal	0.825227	-0.438884	normal	0.738567	-0.503423	normal	[RTKL]	--	Molecular Function: protein serine/threonine kinase activity (GO:0004674);; Molecular Function: protein tyrosine kinase activity (GO:0004713);; Molecular Function: calcium ion binding (GO:0005509);; Molecular Function: ATP binding (GO:0005524);; Cellular Component: plasma membrane (GO:0005886);; Biological Process: protein phosphorylation (GO:0006468);;	--	[T]	Signal transduction mechanisms	Protein kinase domain;; Domain of unknown function (DUF4413)	CDPK-related kinase 3 GN=T3A4.8 OS=Arabidopsis thaliana (Mouse-ear cress) PE=1 SV=1	T	Signal transduction mechanisms	PREDICTED: CDPK-related kinase 3-like [Setaria italica]	biological process: metabolic process (GO:0008152);; biological process: cellular process (GO:0009987);; molecular function: catalytic activity (GO:0003824);; biological process: single-organism process (GO:0044699);; molecular function: binding (GO:0005488);; cellular component: cell (GO:0005623);; cellular component: membrane (GO:0016020);; cellular component: cell part (GO:0044464)	--
BMK_Unigene_049092	CAMK_CDPK	PK	20.0654	9.66759	11.61	15.05	12.1624	10.3976	0.560703	-0.584128	normal	0.879563	-0.16793	normal	0.751897	0.338407	normal	0.98461	0.0172681	normal	[RTKL]	--	Molecular Function: calmodulin-dependent protein kinase activity (GO:0004683);; Molecular Function: calcium ion binding (GO:0005509);; Molecular Function: calmodulin binding (GO:0005516);; Molecular Function: ATP binding (GO:0005524);; Cellular Component: plasma membrane (GO:0005886);; Biological Process: protein phosphorylation (GO:0006468);;	--	[T]	Signal transduction mechanisms	Protein kinase domain;; Protein tyrosine kinase;; Lipopolysaccharide kinase (Kdo/WaaP) family	Calcium/calmodulin-dependent serine/threonine-protein kinase 1 GN=CAMK1 OS=Oryza sativa subsp. japonica (Rice) PE=1 SV=1	T	Signal transduction mechanisms	PREDICTED: calcium/calmodulin-dependent serine/threonine-protein kinase 1-like [Setaria italica]	biological process: metabolic process (GO:0008152);; biological process: cellular process (GO:0009987);; molecular function: catalytic activity (GO:0003824);; molecular function: binding (GO:0005488);; cellular component: cell (GO:0005623);; cellular component: membrane (GO:0016020);; cellular component: cell part (GO:0044464)	--
BMK_Unigene_050330	CAMK_CDPK	PK	41.011	27.3493	21.576	38.6965	36.0689	20.3039	0.97257	-0.0276702	normal	0.921998	-0.105442	normal	0.751897	0.337569	normal	0.641596	-0.569603	normal	[RTKL]	--	Molecular Function: protein serine/threonine kinase activity (GO:0004674);; Molecular Function: calcium ion binding (GO:0005509);; Molecular Function: ATP binding (GO:0005524);; Cellular Component: plasma membrane (GO:0005886);; Biological Process: protein phosphorylation (GO:0006468);;	K13412|0|zma:542226|calcium-dependent protein kinase (EC:2.7.11.1); K13412 calcium-dependent protein kinase [EC:2.7.11.1] (A)	[T]	Signal transduction mechanisms	Protein kinase domain;; EF hand;; Protein tyrosine kinase;; EF-hand domain pair;; EF-hand domain;; EF-hand domain pair;; EF hand;; Cytoskeletal-regulatory complex EF hand	Calcium-dependent protein kinase isoform 2 GN=P0048D08.112 OS=Oryza sativa subsp. japonica (Rice) PE=2 SV=2	T	Signal transduction mechanisms	PREDICTED: calcium-dependent protein kinase 2 isoform X1 [Zea mays]	biological process: metabolic process (GO:0008152);; biological process: cellular process (GO:0009987);; molecular function: catalytic activity (GO:0003824);; molecular function: binding (GO:0005488);; cellular component: cell (GO:0005623);; cellular component: membrane (GO:0016020);; cellular component: cell part (GO:0044464)	Plant-pathogen interaction (ko04626)
BMK_Unigene_050340	CAMK_CDPK	PK	25.3505	36.0595	17.2542	35.6058	30.5602	22.2543	0.471046	0.636554	normal	0.967555	-0.042366	normal	0.944332	-0.154672	normal	0.648244	-0.677065	normal	[RTKL]	--	Molecular Function: protein serine/threonine kinase activity (GO:0004674);; Molecular Function: calcium ion binding (GO:0005509);; Molecular Function: ATP binding (GO:0005524);; Cellular Component: vacuole (GO:0005773);; Cellular Component: plasma membrane (GO:0005886);; Biological Process: protein phosphorylation (GO:0006468);; Biological Process: response to salt stress (GO:0009651);; Biologica…	K13412|0|sita:101784676|calcium-dependent protein kinase 3-like; K13412 calcium-dependent protein kinase [EC:2.7.11.1] (A)	[T]	Signal transduction mechanisms	Protein kinase domain;; EF hand;; EF-hand domain pair;; Protein tyrosine kinase;; EF-hand domain;; EF-hand domain pair;; EF hand;; Cytoskeletal-regulatory complex EF hand;; Secreted protein acidic and rich in cysteine Ca binding region;; Ca2+ insensitive EF hand;; Lipopolysaccharide kinase (Kdo/WaaP) family	Calcium-dependent protein kinase 3 GN=F9D16.120 OS=Arabidopsis thaliana (Mouse-ear cress) PE=1 SV=1	T	Signal transduction mechanisms	PREDICTED: calcium-dependent protein kinase 3-like [Setaria italica]	biological process: metabolic process (GO:0008152);; biological process: cellular process (GO:0009987);; molecular function: catalytic activity (GO:0003824);; molecular function: binding (GO:0005488);; cellular component: cell (GO:0005623);; cellular component: organelle (GO:0043226);; cellular component: cell part (GO:0044464);; cellular component: membrane (GO:0016020);; biological process: res…	Plant-pathogen interaction (ko04626)
BMK_Unigene_051025	CAMK_CDPK	PK	13.732	73.2044	57.437	11.7467	39.6075	44.6902	4.96205e-09	2.69117	up	4.60695e-07	2.61665	up	0.0018486	1.68683	up	2.1822e-05	1.80831	up	[RTKL]	--	Molecular Function: protein serine/threonine kinase activity (GO:0004674);; Molecular Function: calcium ion binding (GO:0005509);; Molecular Function: ATP binding (GO:0005524);; Biological Process: protein phosphorylation (GO:0006468);; Cellular Component: membrane (GO:0016020);;	K13412|0|sita:101756493|calcium-dependent protein kinase isoform 11-like; K13412 calcium-dependent protein kinase [EC:2.7.11.1] (A)	[T]	Signal transduction mechanisms	Protein kinase domain;; Protein tyrosine kinase;; EF hand;; EF-hand domain pair;; EF-hand domain;; EF-hand domain pair;; EF hand;; Lipopolysaccharide kinase (Kdo/WaaP) family;; Cytoskeletal-regulatory complex EF hand;; Phosphotransferase enzyme family;; Ring finger domain;; RING-H2 zinc finger;; Zinc finger, C3HC4 type (RING finger);; Zinc finger, C3HC4 type (RING finger);; Zinc finger, C3HC4 typ…	Calcium-dependent protein kinase isoform 11 OS=Oryza sativa subsp. japonica (Rice) PE=2 SV=2	T	Signal transduction mechanisms	PREDICTED: LOW QUALITY PROTEIN: calcium-dependent protein kinase isoform 11-like [Setaria italica]	biological process: metabolic process (GO:0008152);; biological process: cellular process (GO:0009987);; molecular function: catalytic activity (GO:0003824);; molecular function: binding (GO:0005488);; cellular component: membrane (GO:0016020)	Plant-pathogen interaction (ko04626)
BMK_Unigene_053968	CAMK_CDPK	PK	0	0.269243	0.395814	0	0	0.263809	0.557238	1.91767	normal	0.34624	2.7448	normal	--	--	--	0.699326	1.13923	normal	[RTKL]	--	Molecular Function: kinase activity (GO:0016301);; Molecular Function: ion binding (GO:0043167);;	--	[T]	Signal transduction mechanisms	Protein kinase domain;; Protein tyrosine kinase;; Rhoptry-associated protein 1 (RAP-1)	Calcium-dependent protein kinase 8 GN=F7K24.200 OS=Arabidopsis thaliana (Mouse-ear cress) PE=1 SV=1	T	Signal transduction mechanisms	protein kinase, putative [Phytophthora infestans T30-4]	biological process: metabolic process (GO:0008152);; biological process: cellular process (GO:0009987);; molecular function: catalytic activity (GO:0003824);; molecular function: binding (GO:0005488)	--
BMK_Unigene_057079	CAMK_CDPK	PK	0	0	0	0	0	0	--	--	--	--	--	--	--	--	--	--	--	--	[RTKL]	--	Molecular Function: protein serine/threonine kinase activity (GO:0004674);; Molecular Function: ATP binding (GO:0005524);; Molecular Function: phospholipid binding (GO:0005543);; Biological Process: protein phosphorylation (GO:0006468);;	K13412|5.16969e-18|brp:103859640|calcium-dependent protein kinase 15; K13412 calcium-dependent protein kinase [EC:2.7.11.1] (A)	[T]	Signal transduction mechanisms	Protein kinase domain	Calcium-dependent protein kinase 21 GN=CPK21 OS=Arabidopsis thaliana (Mouse-ear cress) PE=1 SV=1	T	Signal transduction mechanisms	unnamed protein product [Albugo candida]	biological process: metabolic process (GO:0008152);; biological process: cellular process (GO:0009987);; molecular function: catalytic activity (GO:0003824);; molecular function: binding (GO:0005488)	Plant-pathogen interaction (ko04626)
BMK_Unigene_057869	CAMK_CDPK	PK	0	0.457955	0	0.221266	0	0	0.60326	1.69398	normal	--	--	--	0.751897	-0.71312	normal	0.699326	-0.770195	normal	[RTKL]	--	Molecular Function: protein serine/threonine kinase activity (GO:0004674);; Molecular Function: ATP binding (GO:0005524);; Molecular Function: phospholipid binding (GO:0005543);; Biological Process: protein phosphorylation (GO:0006468);;	K13412|7.64386e-14|mis:MICPUN_97075|hypothetical protein; K13412 calcium-dependent protein kinase [EC:2.7.11.1] (A)	[T]	Signal transduction mechanisms	Protein kinase domain;; Protein tyrosine kinase	Calcium-dependent protein kinase 30 GN=F25A4.29 OS=Arabidopsis thaliana (Mouse-ear cress) PE=1 SV=1	T	Signal transduction mechanisms	CAMK/CAMK1 protein kinase [Phytophthora parasitica]	biological process: metabolic process (GO:0008152);; biological process: cellular process (GO:0009987);; molecular function: catalytic activity (GO:0003824);; molecular function: binding (GO:0005488)	--
BMK_Unigene_061853	CAMK_CDPK	PK	0	0	0	0	0.107844	0	--	--	--	--	--	--	--	--	--	--	--	--	[RTKL]	--	Molecular Function: kinase activity (GO:0016301);;	--	[T]	Signal transduction mechanisms	Protein kinase domain;; Protein tyrosine kinase;; Lipopolysaccharide kinase (Kdo/WaaP) family	CBL-interacting protein kinase 21 GN=OJ1136_D11.123 OS=Oryza sativa subsp. japonica (Rice) PE=2 SV=2	T	Signal transduction mechanisms	PREDICTED: phosphoenolpyruvate carboxylase kinase 1-like isoform X3 [Eucalyptus grandis]	biological process: metabolic process (GO:0008152);; biological process: cellular process (GO:0009987);; molecular function: catalytic activity (GO:0003824)	--
BMK_Unigene_064467	CAMK_CDPK	PK	0	0.221978	0	0	0	0	0.60326	1.4473	normal	--	--	--	--	--	--	--	--	--	[RTKL]	--	Molecular Function: protein kinase activity (GO:0004672);; Molecular Function: calcium ion binding (GO:0005509);; Molecular Function: ATP binding (GO:0005524);; Biological Process: protein phosphorylation (GO:0006468);;	--	[T]	Signal transduction mechanisms	Protein kinase domain	Serine/threonine-protein kinase PKZ1 {ECO:0000303|PubMed:15819621} OS=Phytophthora infestans (Potato late blight fungus) PE=1 SV=1	T	Signal transduction mechanisms	CAMK protein kinase, variant 3 [Phytophthora parasitica]	biological process: metabolic process (GO:0008152);; biological process: cellular process (GO:0009987);; molecular function: catalytic activity (GO:0003824);; molecular function: binding (GO:0005488)	--
BMK_Unigene_074116	CAMK_CDPK	PK	1.14727	0	0	2.45064	1.45458	5.0663	0.000246099	-6.03974	down	0.000496832	-5.79688	down	0.92029	-0.346098	normal	0.137169	1.31708	normal	[RTKL]	--	Molecular Function: protein serine/threonine kinase activity (GO:0004674);; Molecular Function: ATP binding (GO:0005524);; Biological Process: protein phosphorylation (GO:0006468);;	--	[T]	Signal transduction mechanisms	Protein kinase domain;; Protein tyrosine kinase	Carbon catabolite-derepressing protein kinase GN=RKIN1 OS=Secale cereale (Rye) PE=2 SV=1	T	Signal transduction mechanisms	hypothetical protein LEMA_P061360.1 [Leptosphaeria maculans JN3]	biological process: metabolic process (GO:0008152);; biological process: cellular process (GO:0009987);; molecular function: catalytic activity (GO:0003824);; molecular function: binding (GO:0005488)	--
BMK_Unigene_074487	CAMK_CDPK	PK	0	0.360935	0.120225	0	0.114584	0.229656	0.60326	1.60169	normal	--	--	--	--	--	--	0.699326	0.884835	normal	--	--	Molecular Function: protein serine/threonine kinase activity (GO:0004674);; Molecular Function: ATP binding (GO:0005524);; Biological Process: protein phosphorylation (GO:0006468);; Biological Process: cellular response to phosphate starvation (GO:0016036);;	--	[T]	Signal transduction mechanisms	Protein kinase domain	Phosphoenolpyruvate carboxylase kinase 1 GN=PPCK1 OS=Arabidopsis thaliana (Mouse-ear cress) PE=1 SV=1	T	Signal transduction mechanisms	TPA: putative phosphoenolpyruvate carboxylase kinase family protein [Zea mays]	biological process: metabolic process (GO:0008152);; biological process: cellular process (GO:0009987);; molecular function: catalytic activity (GO:0003824);; molecular function: binding (GO:0005488);; biological process: single-organism process (GO:0044699);; biological process: response to stimulus (GO:0050896)	--
BMK_Unigene_075832	CAMK_CDPK	PK	0.426387	0.44259	0.513673	0.0475719	0.0189984	4.49201	0.731245	0.703782	normal	0.649003	1.05033	normal	0.985584	0.0959343	normal	0.0156583	3.91837	normal	[RTKL]	--	Molecular Function: protein serine/threonine kinase activity (GO:0004674);; Molecular Function: ATP binding (GO:0005524);; Biological Process: protein phosphorylation (GO:0006468);;	K12761|8.20397e-35|pxb:103945799|CBL-interacting serine/threonine-protein kinase 11-like; K12761 carbon catabolite-derepressing protein kinase [EC:2.7.11.1] (A)	[T]	Signal transduction mechanisms	Protein kinase domain;; Protein tyrosine kinase	CBL-interacting protein kinase 11 GN=P0031D02.33-1 OS=Oryza sativa subsp. japonica (Rice) PE=2 SV=1	T	Signal transduction mechanisms	hypothetical protein CFIO01_08855, partial [Colletotrichum fioriniae PJ7]	biological process: metabolic process (GO:0008152);; biological process: cellular process (GO:0009987);; molecular function: catalytic activity (GO:0003824);; molecular function: binding (GO:0005488)	--
BMK_Unigene_077591	CAMK_CDPK	PK	0.418652	0.837907	0	3.29235	0.333299	0.71872	0.403497	2.39058	normal	--	--	--	0.577792	-1.78862	normal	0.314435	-1.94389	normal	--	--	Molecular Function: protein kinase activity (GO:0004672);; Molecular Function: ATP binding (GO:0005524);; Biological Process: protein phosphorylation (GO:0006468);;	--	[T]	Signal transduction mechanisms	Protein kinase domain;; Protein tyrosine kinase	Calcium-dependent protein kinase 28 GN=CPK28 OS=Arabidopsis thaliana (Mouse-ear cress) PE=1 SV=1	T	Signal transduction mechanisms	CAMK protein kinase [Phytophthora parasitica P10297]	biological process: metabolic process (GO:0008152);; biological process: cellular process (GO:0009987);; molecular function: catalytic activity (GO:0003824);; molecular function: binding (GO:0005488)	--
BMK_Unigene_079272	CAMK_CDPK	PK	7.34958	8.12839	3.70989	9.56278	5.86144	2.06341	0.554266	0.518047	normal	0.650012	-0.444837	normal	0.789716	-0.428076	normal	0.0663675	-1.74348	normal	[RTKL]	--	Molecular Function: protein serine/threonine kinase activity (GO:0004674);; Molecular Function: calcium ion binding (GO:0005509);; Molecular Function: ATP binding (GO:0005524);; Biological Process: protein phosphorylation (GO:0006468);;	K13412|9.59194e-149|sita:101759574|calcium-dependent protein kinase 1-like; K13412 calcium-dependent protein kinase [EC:2.7.11.1] (A)	[T]	Signal transduction mechanisms	Protein kinase domain;; Protein tyrosine kinase;; Lipopolysaccharide kinase (Kdo/WaaP) family	Calcium-dependent protein kinase 1 GN=MUK11.19 OS=Arabidopsis thaliana (Mouse-ear cress) PE=1 SV=1	T	Signal transduction mechanisms	PREDICTED: calcium-dependent protein kinase 1-like [Setaria italica]	biological process: metabolic process (GO:0008152);; biological process: cellular process (GO:0009987);; molecular function: catalytic activity (GO:0003824);; molecular function: binding (GO:0005488)	Plant-pathogen interaction (ko04626)
BMK_Unigene_079813	CAMK_CDPK	PK	0	0	0.90117	0	0.665136	0	--	--	--	0.127066	3.66645	normal	0.751897	1.3846	normal	--	--	--	[RTKL]	--	Molecular Function: protein serine/threonine kinase activity (GO:0004674);; Molecular Function: ATP binding (GO:0005524);; Biological Process: protein phosphorylation (GO:0006468);;	--	[T]	Signal transduction mechanisms	Protein kinase domain	--	T	Signal transduction mechanisms	RAN1-like protein kinase [Colletotrichum orbiculare MAFF 240422]	biological process: metabolic process (GO:0008152);; biological process: cellular process (GO:0009987);; molecular function: catalytic activity (GO:0003824);; molecular function: binding (GO:0005488)	--
BMK_Unigene_081378	CAMK_CDPK	PK	1.99053	5.40259	3.36375	1.26422	1.87957	1.77994	0.707485	0.728172	normal	0.993065	-0.0249746	normal	0.751897	0.877552	normal	0.916459	-0.327694	normal	[RTKL]	--	Molecular Function: protein serine/threonine kinase activity (GO:0004674);; Molecular Function: ATP binding (GO:0005524);; Biological Process: protein phosphorylation (GO:0006468);; Biological Process: cellular response to phosphate starvation (GO:0016036);;	--	[T]	Signal transduction mechanisms	Protein kinase domain;; Protein tyrosine kinase	Phosphoenolpyruvate carboxylase kinase 1 GN=PPCK1 OS=Arabidopsis thaliana (Mouse-ear cress) PE=1 SV=1	T	Signal transduction mechanisms	Phosphoenolpyruvate carboxylase kinase 2 [Triticum urartu]	biological process: metabolic process (GO:0008152);; biological process: cellular process (GO:0009987);; molecular function: catalytic activity (GO:0003824);; molecular function: binding (GO:0005488);; biological process: single-organism process (GO:0044699);; biological process: response to stimulus (GO:0050896)	--
BMK_Unigene_082148	CAMK_CDPK	PK	26.4413	11.5123	12.7699	13.2478	11.8334	11.506	0.381214	-1.23251	normal	0.623808	-0.965202	normal	0.993819	-0.0133724	normal	0.956595	0.096968	normal	[RTKL]	--	Molecular Function: calmodulin-dependent protein kinase activity (GO:0004683);; Molecular Function: calcium ion binding (GO:0005509);; Molecular Function: calmodulin binding (GO:0005516);; Molecular Function: ATP binding (GO:0005524);; Cellular Component: plasma membrane (GO:0005886);; Biological Process: protein phosphorylation (GO:0006468);;	--	[T]	Signal transduction mechanisms	Protein kinase domain	Calcium/calmodulin-dependent serine/threonine-protein kinase 1 GN=CAMK1 OS=Oryza sativa subsp. japonica (Rice) PE=1 SV=1	T	Signal transduction mechanisms	uncharacterized LOC100381527 [Zea mays]	biological process: metabolic process (GO:0008152);; biological process: cellular process (GO:0009987);; molecular function: catalytic activity (GO:0003824);; molecular function: binding (GO:0005488);; cellular component: cell (GO:0005623);; cellular component: membrane (GO:0016020);; cellular component: cell part (GO:0044464)	--
BMK_Unigene_083462	CAMK_CDPK	PK	2.07003	0.913575	0.852938	1.55947	1.39533	0.428767	0.60326	-0.766585	normal	0.65927	-0.743625	normal	0.974209	0.111821	normal	0.462701	-1.2722	normal	[RTKL]	--	Molecular Function: protein serine/threonine kinase activity (GO:0004674);; Molecular Function: protein tyrosine kinase activity (GO:0004713);; Molecular Function: calcium ion binding (GO:0005509);; Molecular Function: ATP binding (GO:0005524);; Cellular Component: plasma membrane (GO:0005886);; Biological Process: protein phosphorylation (GO:0006468);;	--	[T]	Signal transduction mechanisms	Protein kinase domain;; Protein tyrosine kinase;; Lipopolysaccharide kinase (Kdo/WaaP) family;; Phosphotransferase enzyme family	CDPK-related kinase 3 GN=T3A4.8 OS=Arabidopsis thaliana (Mouse-ear cress) PE=1 SV=1	T	Signal transduction mechanisms	PREDICTED: CDPK-related kinase 3-like [Setaria italica]	biological process: metabolic process (GO:0008152);; biological process: cellular process (GO:0009987);; molecular function: catalytic activity (GO:0003824);; biological process: single-organism process (GO:0044699);; molecular function: binding (GO:0005488);; cellular component: cell (GO:0005623);; cellular component: membrane (GO:0016020);; cellular component: cell part (GO:0044464)	--
BMK_Unigene_083955	CAMK_CDPK	PK	2.12746	3.91665	1.54431	1.82192	2.1567	0.91719	0.214626	2.15465	normal	0.99486	-0.0221979	normal	0.757875	0.776424	normal	0.954579	-0.217802	normal	[RTKL]	--	Molecular Function: protein serine/threonine kinase activity (GO:0004674);; Molecular Function: protein tyrosine kinase activity (GO:0004713);; Molecular Function: calcium ion binding (GO:0005509);; Molecular Function: ATP binding (GO:0005524);; Cellular Component: plasma membrane (GO:0005886);; Biological Process: protein phosphorylation (GO:0006468);;	--	[T]	Signal transduction mechanisms	Protein kinase domain	CDPK-related kinase 3 GN=T3A4.8 OS=Arabidopsis thaliana (Mouse-ear cress) PE=1 SV=1	--	--	PREDICTED: CDPK-related kinase 3-like [Setaria italica]	biological process: metabolic process (GO:0008152);; biological process: cellular process (GO:0009987);; molecular function: catalytic activity (GO:0003824);; biological process: single-organism process (GO:0044699);; molecular function: binding (GO:0005488);; cellular component: cell (GO:0005623);; cellular component: membrane (GO:0016020);; cellular component: cell part (GO:0044464)	--
BMK_Unigene_085159	CAMK_CDPK	PK	1.78089	0.259185	0.83516	0.123326	1.48001	1.40261	0.300634	-2.05133	normal	0.819143	-0.474746	normal	0.222863	2.54993	normal	0.0608081	2.8606	normal	[RTKL]	--	Molecular Function: protein serine/threonine kinase activity (GO:0004674);; Molecular Function: calcium ion binding (GO:0005509);; Molecular Function: ATP binding (GO:0005524);; Cellular Component: mitochondrion (GO:0005739);; Biological Process: protein phosphorylation (GO:0006468);;	K13412|1.19628e-87|obr:102716242|calcium-dependent protein kinase 32-like; K13412 calcium-dependent protein kinase [EC:2.7.11.1] (A)	[T]	Signal transduction mechanisms	Protein kinase domain;; Protein tyrosine kinase	Calcium-dependent protein kinase 13 GN=CPK13 OS=Arabidopsis thaliana (Mouse-ear cress) PE=1 SV=2	T	Signal transduction mechanisms	PREDICTED: calcium-dependent protein kinase 32-like, partial [Oryza brachyantha]	biological process: metabolic process (GO:0008152);; biological process: cellular process (GO:0009987);; molecular function: catalytic activity (GO:0003824);; molecular function: binding (GO:0005488);; cellular component: cell (GO:0005623);; cellular component: organelle (GO:0043226);; cellular component: cell part (GO:0044464)	Plant-pathogen interaction (ko04626)
BMK_Unigene_085160	CAMK_CDPK	PK	4.25686	3.71574	0.749682	3.03211	3.41463	0.959308	0.767558	0.519923	normal	0.651908	-0.870772	normal	0.90692	0.328924	normal	0.657644	-1.19638	normal	[TZDR]	--	Molecular Function: protein serine/threonine kinase activity (GO:0004674);; Molecular Function: calcium ion binding (GO:0005509);; Molecular Function: ATP binding (GO:0005524);; Cellular Component: plasma membrane (GO:0005886);; Biological Process: protein phosphorylation (GO:0006468);;	K13412|3.69913e-165|sita:101779715|calcium-dependent protein kinase 30-like; K13412 calcium-dependent protein kinase [EC:2.7.11.1] (A)	[T]	Signal transduction mechanisms	EF hand;; EF-hand domain pair;; EF-hand domain;; EF-hand domain pair;; EF hand;; Cytoskeletal-regulatory complex EF hand;; Protein kinase domain;; Secreted protein acidic and rich in cysteine Ca binding region	Calcium-dependent protein kinase 10 GN=F6A14.1 OS=Arabidopsis thaliana (Mouse-ear cress) PE=1 SV=1	T	Signal transduction mechanisms	PREDICTED: calcium-dependent protein kinase 30-like [Setaria italica]	biological process: metabolic process (GO:0008152);; biological process: cellular process (GO:0009987);; molecular function: catalytic activity (GO:0003824);; molecular function: binding (GO:0005488);; cellular component: cell (GO:0005623);; cellular component: membrane (GO:0016020);; cellular component: cell part (GO:0044464)	Plant-pathogen interaction (ko04626)
BMK_Unigene_085575	CAMK_CDPK	PK	48.2979	62.3996	46.6823	57.8369	80.0241	52.826	0.298576	0.750186	normal	0.601655	0.585573	normal	0.660541	0.604815	normal	0.921333	-0.0932947	normal	[RTKL]	--	Molecular Function: protein serine/threonine kinase activity (GO:0004674);; Molecular Function: calcium ion binding (GO:0005509);; Molecular Function: ATP binding (GO:0005524);; Cellular Component: plasma membrane (GO:0005886);; Biological Process: protein phosphorylation (GO:0006468);; Biological Process: positive regulation of abscisic acid-activated signaling pathway (GO:0009789);;	K13412|0|sbi:SORBI_05g004610|SORBIDRAFT_05g004610, Sb05g004610; hypothetical protein; K13412 calcium-dependent protein kinase [EC:2.7.11.1] (A)	[T]	Signal transduction mechanisms	Protein kinase domain;; EF hand;; EF-hand domain pair;; Protein tyrosine kinase;; EF-hand domain;; EF hand;; EF-hand domain pair	Calcium-dependent protein kinase SK5 OS=Glycine max (Soybean) PE=1 SV=1	T	Signal transduction mechanisms	TPA: putative calcium-dependent protein kinase family protein [Zea mays]	biological process: metabolic process (GO:0008152);; biological process: cellular process (GO:0009987);; molecular function: catalytic activity (GO:0003824);; molecular function: binding (GO:0005488);; cellular component: cell (GO:0005623);; cellular component: membrane (GO:0016020);; cellular component: cell part (GO:0044464);; biological process: biological regulation (GO:0065007)	Plant-pathogen interaction (ko04626)
BMK_Unigene_086646	CAMK_CDPK	PK	31.6246	31.6773	10.3721	37.8452	23.6808	14.0198	0.787103	-0.31715	normal	0.0469459	-1.59978	normal	0.816504	-0.390207	normal	0.166309	-1.40611	normal	[RTKL]	--	Molecular Function: protein serine/threonine kinase activity (GO:0004674);; Molecular Function: calcium ion binding (GO:0005509);; Molecular Function: ATP binding (GO:0005524);; Cellular Component: plasma membrane (GO:0005886);; Biological Process: protein phosphorylation (GO:0006468);;	K13412|0|zma:103652859|calcium-dependent protein kinase 28-like; K13412 calcium-dependent protein kinase [EC:2.7.11.1] (A)	[T]	Signal transduction mechanisms	Protein kinase domain;; EF hand;; EF hand;; EF-hand domain pair;; EF-hand domain;; EF-hand domain pair;; Protein tyrosine kinase;; Secreted protein acidic and rich in cysteine Ca binding region;; Protein kinase domain;; Protein tyrosine kinase	Calcium-dependent protein kinase 16 GN=CPK16 OS=Arabidopsis thaliana (Mouse-ear cress) PE=3 SV=1	--	--	PREDICTED: calcium-dependent protein kinase 16-like isoform X2 [Setaria italica]	biological process: metabolic process (GO:0008152);; biological process: cellular process (GO:0009987);; molecular function: catalytic activity (GO:0003824);; molecular function: binding (GO:0005488);; cellular component: cell (GO:0005623);; cellular component: membrane (GO:0016020);; cellular component: cell part (GO:0044464)	Plant-pathogen interaction (ko04626)
BMK_Unigene_087260	CAMK_CDPK	PK	47.7239	24.8287	22.6813	40.2604	41.7356	21.3569	0.80962	-0.215261	normal	0.747805	-0.304922	normal	0.751897	0.51012	normal	0.835651	-0.228357	normal	[RTKL]	--	Molecular Function: calmodulin-dependent protein kinase activity (GO:0004683);; Molecular Function: calcium ion binding (GO:0005509);; Molecular Function: ATP binding (GO:0005524);; Cellular Component: plasma membrane (GO:0005886);; Biological Process: protein phosphorylation (GO:0006468);;	K13412|0|sita:101784780|calcium-dependent protein kinase 28-like; K13412 calcium-dependent protein kinase [EC:2.7.11.1] (A)	[T]	Signal transduction mechanisms	Protein kinase domain;; Protein tyrosine kinase;; EF hand;; EF-hand domain pair;; EF hand;; EF-hand domain;; EF-hand domain pair;; Secreted protein acidic and rich in cysteine Ca binding region;; Kinase-like	Calcium-dependent protein kinase 16 GN=CPK16 OS=Arabidopsis thaliana (Mouse-ear cress) PE=3 SV=1	T	Signal transduction mechanisms	PREDICTED: calcium-dependent protein kinase 28-like [Setaria italica]	biological process: metabolic process (GO:0008152);; biological process: cellular process (GO:0009987);; molecular function: catalytic activity (GO:0003824);; molecular function: binding (GO:0005488);; cellular component: cell (GO:0005623);; cellular component: membrane (GO:0016020);; cellular component: cell part (GO:0044464)	Plant-pathogen interaction (ko04626)
BMK_Unigene_087472	CAMK_CDPK	PK	2.17124	0.760389	0.607846	3.13527	1.33289	0.592942	0.613943	-0.984141	normal	0.650012	-1.05764	normal	0.761187	-0.654775	normal	0.61379	-1.34886	normal	[RTKL]	--	Molecular Function: calmodulin-dependent protein kinase activity (GO:0004683);; Molecular Function: calcium ion binding (GO:0005509);; Molecular Function: ATP binding (GO:0005524);; Biological Process: protein phosphorylation (GO:0006468);;	K13412|1.23703e-40|sita:101777772|calcium-dependent protein kinase 1-like; K13412 calcium-dependent protein kinase [EC:2.7.11.1] (A)	[T]	Signal transduction mechanisms	Protein kinase domain;; Protein tyrosine kinase	Calcium-dependent protein kinase 1 GN=MUK11.19 OS=Arabidopsis thaliana (Mouse-ear cress) PE=1 SV=1	T	Signal transduction mechanisms	PREDICTED: calcium-dependent protein kinase 1-like isoform X1 [Setaria italica]	biological process: metabolic process (GO:0008152);; biological process: cellular process (GO:0009987);; molecular function: catalytic activity (GO:0003824);; molecular function: binding (GO:0005488)	Plant-pathogen interaction (ko04626)
BMK_Unigene_087581	CAMK_CDPK	PK	68.2699	47.8404	34.3331	58.2874	62.3392	38.8214	0.96961	0.0282545	normal	0.469473	-0.51232	normal	0.70323	0.540619	normal	0.937727	0.0754795	normal	[RTKL]	--	Molecular Function: protein serine/threonine kinase activity (GO:0004674);; Molecular Function: calcium ion binding (GO:0005509);; Molecular Function: ATP binding (GO:0005524);; Cellular Component: plasma membrane (GO:0005886);; Biological Process: protein phosphorylation (GO:0006468);;	K13412|0|zma:542226|calcium-dependent protein kinase (EC:2.7.11.1); K13412 calcium-dependent protein kinase [EC:2.7.11.1] (A)	[T]	Signal transduction mechanisms	Protein kinase domain;; EF hand;; EF-hand domain pair;; Protein tyrosine kinase;; EF-hand domain;; EF-hand domain pair;; EF hand;; Cytoskeletal-regulatory complex EF hand;; Secreted protein acidic and rich in cysteine Ca binding region;; Toprim-like;; Ca2+ insensitive EF hand	Calcium-dependent protein kinase isoform 2 GN=P0048D08.112 OS=Oryza sativa subsp. japonica (Rice) PE=2 SV=2	T	Signal transduction mechanisms	PREDICTED: calcium-dependent protein kinase 2 isoform X1 [Zea mays]	biological process: metabolic process (GO:0008152);; biological process: cellular process (GO:0009987);; molecular function: catalytic activity (GO:0003824);; molecular function: binding (GO:0005488);; cellular component: cell (GO:0005623);; cellular component: membrane (GO:0016020);; cellular component: cell part (GO:0044464)	Plant-pathogen interaction (ko04626)
BMK_Unigene_088333	CAMK_CDPK	PK	2.33549	0	0.366725	2.03992	0.386189	0.0640528	0.316207	-2.78019	normal	0.933056	0.26251	normal	0.651203	-1.56611	normal	0.10727	-2.98564	normal	[RTKL]	--	Molecular Function: calmodulin-dependent protein kinase activity (GO:0004683);; Molecular Function: calcium ion binding (GO:0005509);; Molecular Function: ATP binding (GO:0005524);; Biological Process: protein phosphorylation (GO:0006468);;	--	[T]	Signal transduction mechanisms	Protein kinase domain;; Protein tyrosine kinase	CDPK-related kinase 5 GN=T20E23.130 OS=Arabidopsis thaliana (Mouse-ear cress) PE=2 SV=1	T	Signal transduction mechanisms	PREDICTED: CDPK-related kinase 5-like [Brachypodium distachyon]	biological process: metabolic process (GO:0008152);; biological process: cellular process (GO:0009987);; molecular function: catalytic activity (GO:0003824);; molecular function: binding (GO:0005488)	--
BMK_Unigene_088878	CAMK_CDPK	PK	2.70831	2.46792	1.75931	4.42245	3.80806	3.95979	0.531605	0.586151	normal	0.63029	0.571658	normal	0.985584	0.0416919	normal	0.867085	-0.146667	normal	[RTKL]	--	Molecular Function: protein serine/threonine kinase activity (GO:0004674);; Molecular Function: ATP binding (GO:0005524);; Biological Process: protein phosphorylation (GO:0006468);;	--	[T]	Signal transduction mechanisms	Protein kinase domain;; Protein tyrosine kinase;; Phosphotransferase enzyme family;; Protein kinase domain	Serine/threonine-protein kinase PEPKR2 GN=PEPKR2 OS=Arabidopsis thaliana (Mouse-ear cress) PE=2 SV=1	--	--	PREDICTED: serine/threonine-protein kinase PEPKR2-like [Setaria italica]	biological process: metabolic process (GO:0008152);; biological process: cellular process (GO:0009987);; molecular function: catalytic activity (GO:0003824);; molecular function: binding (GO:0005488)	--
BMK_Unigene_089967	CAMK_CDPK	PK	16.8542	9.98134	12.1464	17.1306	13.6878	12.0767	0.639422	-0.247444	normal	0.934822	0.0748414	normal	0.935589	0.101417	normal	0.867467	0.129207	normal	[RTKL]	--	Molecular Function: calmodulin-dependent protein kinase activity (GO:0004683);; Molecular Function: calcium ion binding (GO:0005509);; Molecular Function: calmodulin binding (GO:0005516);; Molecular Function: ATP binding (GO:0005524);; Cellular Component: plasma membrane (GO:0005886);; Biological Process: protein phosphorylation (GO:0006468);;	--	[T]	Signal transduction mechanisms	Protein kinase domain;; Protein tyrosine kinase;; Lipopolysaccharide kinase (Kdo/WaaP) family	Calcium/calmodulin-dependent serine/threonine-protein kinase 1 GN=CAMK1 OS=Oryza sativa subsp. japonica (Rice) PE=1 SV=1	T	Signal transduction mechanisms	PREDICTED: calcium/calmodulin-dependent serine/threonine-protein kinase 1-like [Setaria italica]	biological process: metabolic process (GO:0008152);; biological process: cellular process (GO:0009987);; molecular function: catalytic activity (GO:0003824);; molecular function: binding (GO:0005488);; cellular component: cell (GO:0005623);; cellular component: membrane (GO:0016020);; cellular component: cell part (GO:0044464)	--
BMK_Unigene_091171	CAMK_CDPK	PK	39.6785	55.9782	26.5137	50.8833	46.5131	34.6105	0.165394	0.772443	normal	0.887281	-0.122121	normal	0.751897	0.350729	normal	0.971296	0.0478411	normal	[RTKL]	--	Molecular Function: protein serine/threonine kinase activity (GO:0004674);; Molecular Function: calcium ion binding (GO:0005509);; Molecular Function: ATP binding (GO:0005524);; Cellular Component: vacuole (GO:0005773);; Cellular Component: plasma membrane (GO:0005886);; Biological Process: protein phosphorylation (GO:0006468);; Biological Process: response to salt stress (GO:0009651);; Biologica…	K13412|0|sita:101784676|calcium-dependent protein kinase 3-like; K13412 calcium-dependent protein kinase [EC:2.7.11.1] (A)	[T]	Signal transduction mechanisms	Protein kinase domain;; EF hand;; EF-hand domain pair;; Protein tyrosine kinase;; EF-hand domain;; EF-hand domain pair;; EF hand;; Cytoskeletal-regulatory complex EF hand;; Secreted protein acidic and rich in cysteine Ca binding region;; Kinase-like;; Toprim-like;; Lipopolysaccharide kinase (Kdo/WaaP) family	Calcium-dependent protein kinase 3 GN=F9D16.120 OS=Arabidopsis thaliana (Mouse-ear cress) PE=1 SV=1	T	Signal transduction mechanisms	PREDICTED: calcium-dependent protein kinase 3-like [Setaria italica]	biological process: metabolic process (GO:0008152);; biological process: cellular process (GO:0009987);; molecular function: catalytic activity (GO:0003824);; molecular function: binding (GO:0005488);; cellular component: cell (GO:0005623);; cellular component: organelle (GO:0043226);; cellular component: cell part (GO:0044464);; cellular component: membrane (GO:0016020);; biological process: res…	Plant-pathogen interaction (ko04626)
BMK_Unigene_091405	CAMK_CDPK	PK	13.8096	74.7521	57.7048	12.0683	41.9869	48.2386	0.000127345	3.43571	up	0.000191647	3.47691	up	0.396909	1.42331	normal	0.00771565	2.18347	up	[RTKL]	--	Molecular Function: protein serine/threonine kinase activity (GO:0004674);; Molecular Function: calcium ion binding (GO:0005509);; Molecular Function: ATP binding (GO:0005524);; Biological Process: protein phosphorylation (GO:0006468);; Cellular Component: membrane (GO:0016020);;	K13412|0|sita:101756493|calcium-dependent protein kinase isoform 11-like; K13412 calcium-dependent protein kinase [EC:2.7.11.1] (A)	[T]	Signal transduction mechanisms	Protein kinase domain;; Protein tyrosine kinase;; EF hand;; EF-hand domain pair;; EF-hand domain;; EF-hand domain pair;; EF hand;; Lipopolysaccharide kinase (Kdo/WaaP) family;; Cytoskeletal-regulatory complex EF hand	Calcium-dependent protein kinase isoform 11 OS=Oryza sativa subsp. japonica (Rice) PE=2 SV=2	--	--	PREDICTED: LOW QUALITY PROTEIN: calcium-dependent protein kinase isoform 11-like [Setaria italica]	biological process: metabolic process (GO:0008152);; biological process: cellular process (GO:0009987);; molecular function: catalytic activity (GO:0003824);; molecular function: binding (GO:0005488);; cellular component: membrane (GO:0016020)	Plant-pathogen interaction (ko04626)
BMK_Unigene_091771	CAMK_CDPK	PK	3.44628	3.53721	3.57589	4.72984	2.65838	1.65658	--	--	--	--	--	--	--	--	--	--	--	--	[RTKL]	--	Molecular Function: protein serine/threonine kinase activity (GO:0004674);; Molecular Function: calcium ion binding (GO:0005509);; Molecular Function: ATP binding (GO:0005524);; Biological Process: protein phosphorylation (GO:0006468);;	K13412|1.07846e-41|sita:101774986|calcium-dependent protein kinase isoform 1-like; K13412 calcium-dependent protein kinase [EC:2.7.11.1] (A)	[T]	Signal transduction mechanisms	Protein kinase domain;; Protein tyrosine kinase	Calcium-dependent protein kinase 4 GN=CPK4 OS=Solanum tuberosum (Potato) PE=2 SV=1	T	Signal transduction mechanisms	PREDICTED: calcium-dependent protein kinase isoform 1-like [Setaria italica]	biological process: metabolic process (GO:0008152);; biological process: cellular process (GO:0009987);; molecular function: catalytic activity (GO:0003824);; molecular function: binding (GO:0005488)	Plant-pathogen interaction (ko04626)
BMK_Unigene_093880	CAMK_CDPK	PK	0.0607889	0.185174	0.0566717	0.299575	0	0	0.786824	0.82149	normal	0.967555	0.13921	normal	0.751897	-0.908439	normal	0.699326	-0.988302	normal	[RTKL]	--	Molecular Function: transferase activity, transferring phosphorus-containing groups (GO:0016772);;	--	[T]	Signal transduction mechanisms	Protein kinase domain;; Protein tyrosine kinase	CBL-interacting protein kinase 1 GN=P0706B05.31 OS=Oryza sativa subsp. japonica (Rice) PE=2 SV=1	T	Signal transduction mechanisms	serine/threonine protein kinase [Galdieria sulphuraria]	biological process: metabolic process (GO:0008152);; molecular function: catalytic activity (GO:0003824)	--
BMK_Unigene_097128	CAMK_CDPK	PK	0	0.344546	0.0855069	0	0	0.165411	0.60326	1.70346	normal	--	--	--	--	--	--	0.699326	0.884835	normal	[RTKL]	--	Molecular Function: protein serine/threonine kinase activity (GO:0004674);; Molecular Function: ATP binding (GO:0005524);; Biological Process: protein phosphorylation (GO:0006468);;	K08794|3.68023e-21|gsl:Gasu_50310|serine/threonine protein kinase (EC:2.7.11.1); K08794 calcium/calmodulin-dependent protein kinase I [EC:2.7.11.17] (A)	[T]	Signal transduction mechanisms	Protein kinase domain;; Protein tyrosine kinase	Calcium-dependent protein kinase 14 GN=CPK14 OS=Arabidopsis thaliana (Mouse-ear cress) PE=2 SV=1	T	Signal transduction mechanisms	CAMK/CAMK1/CAMK1-CMK protein kinase [Fusarium oxysporum FOSC 3-a]	biological process: metabolic process (GO:0008152);; biological process: cellular process (GO:0009987);; molecular function: catalytic activity (GO:0003824);; molecular function: binding (GO:0005488)	--
BMK_Unigene_099166	CAMK_CDPK	PK	0.0767501	0.291068	0.416873	0	0.215303	0	0.664029	1.19311	normal	0.65547	1.35808	normal	0.751897	0.90481	normal	--	--	--	[RTKL]	--	Molecular Function: protein serine/threonine kinase activity (GO:0004674);; Molecular Function: ATP binding (GO:0005524);; Biological Process: protein phosphorylation (GO:0006468);;	K08269|1.5199e-16|mtr:MTR_3g095620|Serine/threonine protein kinase GE16371; K08269 serine/threonine-protein kinase ULK/ATG1 [EC:2.7.11.1] (A)	[T]	Signal transduction mechanisms	Protein kinase domain;; Protein tyrosine kinase	Serine/threonine-protein kinase AtPK2/AtPK19 GN=F17O14.19 OS=Arabidopsis thaliana (Mouse-ear cress) PE=1 SV=2	T	Signal transduction mechanisms	CAMK/CAMK1/CAMK1-RCK protein kinase [Fusarium oxysporum f. sp. cubense tropical race 4 54006]	biological process: metabolic process (GO:0008152);; biological process: cellular process (GO:0009987);; molecular function: catalytic activity (GO:0003824);; molecular function: binding (GO:0005488)	Regulation of autophagy (ko04140)
BMK_Unigene_099643	CAMK_CDPK	PK	0.307496	0	0	0.0988712	0	0	0.60326	-1.43188	normal	0.650012	-1.31637	normal	--	--	--	--	--	--	[RTKL]	--	Molecular Function: kinase activity (GO:0016301);;	--	[T]	Signal transduction mechanisms	Protein kinase domain;; Protein tyrosine kinase	Putative CBL-interacting protein kinase 27 GN=P0701F11.10 OS=Oryza sativa subsp. japonica (Rice) PE=3 SV=1	T	Signal transduction mechanisms	hypothetical protein AURANDRAFT_3405, partial [Aureococcus anophagefferens]	biological process: metabolic process (GO:0008152);; biological process: cellular process (GO:0009987);; molecular function: catalytic activity (GO:0003824)	--
BMK_Unigene_106785	CAMK_CDPK	PK	0	0	0	0.294364	0	0	--	--	--	--	--	--	0.751897	-0.804111	normal	0.699326	-0.872999	normal	[RTKL]	--	Molecular Function: protein serine/threonine kinase activity (GO:0004674);; Molecular Function: ATP binding (GO:0005524);; Biological Process: protein phosphorylation (GO:0006468);;	--	[T]	Signal transduction mechanisms	Protein kinase domain;; Protein tyrosine kinase	CDPK-related kinase 7 GN=CRK7 OS=Arabidopsis thaliana (Mouse-ear cress) PE=1 SV=1	T	Signal transduction mechanisms	hypothetical protein PHYSODRAFT_354604 [Phytophthora sojae]	biological process: metabolic process (GO:0008152);; biological process: cellular process (GO:0009987);; molecular function: catalytic activity (GO:0003824);; molecular function: binding (GO:0005488)	--
BMK_Unigene_001623	CAMK_OST1L	PK	41.6184	35.7004	30.9807	42.5006	35.0258	37.8473	0.769914	0.151591	normal	0.894952	0.0899243	normal	0.915021	0.118996	normal	0.566407	0.358504	normal	[RTKL]	--	Molecular Function: protein serine/threonine kinase activity (GO:0004674);; Molecular Function: ATP binding (GO:0005524);; Cellular Component: nucleus (GO:0005634);; Cellular Component: cytosol (GO:0005829);; Biological Process: sucrose metabolic process (GO:0005985);; Biological Process: protein phosphorylation (GO:0006468);; Biological Process: unsaturated fatty acid biosynthetic process (GO:00…	K14498|0|sita:101752819|serine/threonine-protein kinase SAPK8-like; K14498 serine/threonine-protein kinase SRK2 [EC:2.7.11.1] (A)	[T]	Signal transduction mechanisms	Protein kinase domain;; Protein tyrosine kinase	Serine/threonine-protein kinase SAPK8 GN=OSJNBa0079B15.27 OS=Oryza sativa subsp. japonica (Rice) PE=2 SV=1	--	--	PREDICTED: serine/threonine-protein kinase SAPK8-like [Setaria italica]	biological process: metabolic process (GO:0008152);; biological process: cellular process (GO:0009987);; molecular function: catalytic activity (GO:0003824);; molecular function: binding (GO:0005488);; cellular component: cell (GO:0005623);; cellular component: organelle (GO:0043226);; cellular component: cell part (GO:0044464);; biological process: single-organism process (GO:0044699);; biologic…	Plant hormone signal transduction (ko04075)
BMK_Unigene_004778	CAMK_OST1L	PK	21.7898	23.7776	27.2527	21.986	23.7119	22.3418	0.320874	0.522833	normal	0.116965	0.804131	normal	0.751897	0.425278	normal	0.379682	0.507969	normal	[RTKL]	--	Molecular Function: protein serine/threonine kinase activity (GO:0004674);; Molecular Function: ATP binding (GO:0005524);; Cellular Component: nucleus (GO:0005634);; Cellular Component: cytosol (GO:0005829);; Biological Process: protein phosphorylation (GO:0006468);; Biological Process: response to salt stress (GO:0009651);; Biological Process: abscisic acid-activated signaling pathway (GO:000973…	K14498|0|sita:101782227|serine/threonine-protein kinase SAPK2-like; K14498 serine/threonine-protein kinase SRK2 [EC:2.7.11.1] (A)	[T]	Signal transduction mechanisms	Protein kinase domain;; Protein tyrosine kinase	Serine/threonine-protein kinase SAPK2 GN=SAPK2 OS=Oryza sativa subsp. indica (Rice) PE=2 SV=2	--	--	PREDICTED: serine/threonine-protein kinase SAPK2-like [Setaria italica]	biological process: metabolic process (GO:0008152);; biological process: cellular process (GO:0009987);; molecular function: catalytic activity (GO:0003824);; molecular function: binding (GO:0005488);; cellular component: cell (GO:0005623);; cellular component: organelle (GO:0043226);; cellular component: cell part (GO:0044464);; biological process: response to stimulus (GO:0050896);; biological …	Plant hormone signal transduction (ko04075)
BMK_Unigene_006875	CAMK_OST1L	PK	41.9313	39.4444	21.1282	57.2426	59.2271	29.6533	0.60326	0.309303	normal	0.549905	-0.448754	normal	0.751897	0.437283	normal	0.699326	-0.424218	normal	[RTKL]	--	Molecular Function: protein tyrosine kinase activity (GO:0004713);; Molecular Function: ATP binding (GO:0005524);; Cellular Component: nucleus (GO:0005634);; Cellular Component: cytosol (GO:0005829);; Biological Process: sucrose metabolic process (GO:0005985);; Biological Process: protein phosphorylation (GO:0006468);; Biological Process: unsaturated fatty acid biosynthetic process (GO:0006636);;…	K14498|0|sita:101758084|serine/threonine-protein kinase SAPK10-like; K14498 serine/threonine-protein kinase SRK2 [EC:2.7.11.1] (A)	[T]	Signal transduction mechanisms	Protein kinase domain;; Protein tyrosine kinase	Serine/threonine-protein kinase SAPK10 GN=OSJNBb0007E22.11 OS=Oryza sativa subsp. japonica (Rice) PE=2 SV=1	--	--	PREDICTED: serine/threonine-protein kinase SAPK10-like [Setaria italica]	biological process: metabolic process (GO:0008152);; biological process: cellular process (GO:0009987);; biological process: single-organism process (GO:0044699);; molecular function: catalytic activity (GO:0003824);; molecular function: binding (GO:0005488);; cellular component: cell (GO:0005623);; cellular component: organelle (GO:0043226);; cellular component: cell part (GO:0044464);; biologic…	Plant hormone signal transduction (ko04075)
BMK_Unigene_012005	CAMK_OST1L	PK	0.37026	4.12376	0.763507	0.00858358	0.525057	0.0248304	1.50177e-13	3.77772	up	0.235026	1.50401	normal	0.0496736	3.49093	normal	0.790013	0.674517	normal	[RTKL]	--	Molecular Function: protein kinase activity (GO:0004672);; Biological Process: phosphorylation (GO:0016310);;	K07198|1.61504e-31|fve:101309888|CBL-interacting protein kinase 2-like (A)	[T]	Signal transduction mechanisms	Protein kinase domain;; Protein tyrosine kinase;; Kinase-like	CBL-interacting serine/threonine-protein kinase 24 OS=Arabidopsis thaliana (Mouse-ear cress) PE=1 SV=1	T	Signal transduction mechanisms	putative kinase [Rhizoctonia solani 123E]	biological process: metabolic process (GO:0008152);; biological process: cellular process (GO:0009987);; molecular function: catalytic activity (GO:0003824)	Regulation of autophagy (ko04140)
BMK_Unigene_015006	CAMK_OST1L	PK	0.58215	2.63861	1.56508	0	0.357874	0.00607771	0.00310775	2.5097	up	0.0324849	1.93996	normal	0.0462743	3.60624	normal	--	--	--	[RTKL]	--	Molecular Function: protein kinase activity (GO:0004672);; Biological Process: phosphorylation (GO:0016310);;	--	[T]	Signal transduction mechanisms	Protein kinase domain;; Protein tyrosine kinase;; Kinase-like	CBL-interacting serine/threonine-protein kinase 12 GN=F28A21.110 OS=Arabidopsis thaliana (Mouse-ear cress) PE=1 SV=1	T	Signal transduction mechanisms	RAN protein kinase [Gaeumannomyces graminis var. tritici R3-111a-1]	biological process: metabolic process (GO:0008152);; biological process: cellular process (GO:0009987);; molecular function: catalytic activity (GO:0003824)	--
BMK_Unigene_015352	CAMK_OST1L	PK	27.292	12.5696	18.925	20.6493	22.6303	14.3131	0.257596	-0.753209	normal	0.959051	-0.0602269	normal	0.751897	0.394041	normal	0.777487	-0.166133	normal	[RTKL]	--	Molecular Function: protein serine/threonine kinase activity (GO:0004674);; Molecular Function: ATP binding (GO:0005524);; Biological Process: protein phosphorylation (GO:0006468);; Biological Process: abscisic acid-activated signaling pathway (GO:0009738);;	K14498|0|sita:101763654|serine/threonine-protein kinase SAPK3-like; K14498 serine/threonine-protein kinase SRK2 [EC:2.7.11.1] (A)	[T]	Signal transduction mechanisms	Protein kinase domain;; Protein tyrosine kinase	Serine/threonine-protein kinase SAPK3 GN=OSJNBa0027P10.6 OS=Oryza sativa subsp. japonica (Rice) PE=1 SV=1	T	Signal transduction mechanisms	PREDICTED: serine/threonine-protein kinase SAPK3-like [Setaria italica]	biological process: metabolic process (GO:0008152);; biological process: cellular process (GO:0009987);; molecular function: catalytic activity (GO:0003824);; molecular function: binding (GO:0005488);; biological process: signaling (GO:0023052);; biological process: single-organism process (GO:0044699);; biological process: response to stimulus (GO:0050896);; biological process: biological regula…	Plant hormone signal transduction (ko04075)
BMK_Unigene_019165	CAMK_OST1L	PK	0.157384	0	0.0196691	1.82806	0.491484	1.831	0.405315	-2.46545	normal	0.650012	-1.42344	normal	0.72579	-1.25929	normal	0.812305	0.330073	normal	[RTKL]	--	--	K07198|1.15336e-26|ccp:CHC_T00009299001|Serine/threonine protein kinase; K07198 5'-AMP-activated protein kinase, catalytic alpha subunit [EC:2.7.11.11] (A)	[D]	Cell cycle control, cell division, chromosome partitioning	Protein kinase domain;; Protein tyrosine kinase	SNF1-related protein kinase catalytic subunit alpha KIN11 GN=MXE2.16 OS=Arabidopsis thaliana (Mouse-ear cress) PE=1 SV=1	T	Signal transduction mechanisms	hypothetical protein PHYSODRAFT_333696 [Phytophthora sojae]	--	--
BMK_Unigene_019583	CAMK_OST1L	PK	0.284268	0.008661	0	0.692743	1.35197	2.48614	0.106368	-3.35322	normal	0.0631672	-4.07479	normal	0.751897	0.963016	normal	0.00386186	2.07635	up	[RTKL]	--	Molecular Function: protein serine/threonine kinase activity (GO:0004674);; Molecular Function: ATP binding (GO:0005524);; Biological Process: protein phosphorylation (GO:0006468);;	K07198|3.61899e-37|cic:CICLE_v10025649mg|hypothetical protein; K07198 5'-AMP-activated protein kinase, catalytic alpha subunit [EC:2.7.11.11] (A)	[T]	Signal transduction mechanisms	Protein kinase domain;; Protein tyrosine kinase;; Kinase-like	Putative CBL-interacting protein kinase 27 GN=P0701F11.10 OS=Oryza sativa subsp. japonica (Rice) PE=3 SV=1	T	Signal transduction mechanisms	hypothetical protein SNOG_01629 [Phaeosphaeria nodorum SN15]	biological process: metabolic process (GO:0008152);; biological process: cellular process (GO:0009987);; molecular function: catalytic activity (GO:0003824);; molecular function: binding (GO:0005488)	Regulation of autophagy (ko04140)
BMK_Unigene_034165	CAMK_OST1L	PK	18.3907	4.25722	1.6835	0.34436	0	0	0.155703	-1.66548	normal	0.00759183	-2.77115	down	0.585262	-1.83975	normal	0.283969	-2.33782	normal	[RTKL]	--	Molecular Function: nucleotide binding (GO:0000166);; Molecular Function: protein kinase activity (GO:0004672);; Biological Process: phosphorylation (GO:0016310);;	K07359|4.83344e-43|olu:OSTLU_39356|hypothetical protein; K07359 calcium/calmodulin-dependent protein kinase kinase [EC:2.7.11.17] (A)	[T]	Signal transduction mechanisms	Protein kinase domain;; Protein tyrosine kinase;; Kinase-like	Serine/threonine-protein kinase GRIK2 GN=MUF9.18 OS=Arabidopsis thaliana (Mouse-ear cress) PE=1 SV=1	T	Signal transduction mechanisms	hypothetical protein PHYSODRAFT_555042 [Phytophthora sojae]	molecular function: binding (GO:0005488);; biological process: metabolic process (GO:0008152);; biological process: cellular process (GO:0009987);; molecular function: catalytic activity (GO:0003824)	--
BMK_Unigene_043488	CAMK_OST1L	PK	6.63134	7.37647	3.58759	5.79171	8.5982	5.0847	0.465145	0.810414	normal	0.824204	0.281524	normal	0.751897	0.719726	normal	0.64341	-0.558654	normal	[RTKL]	--	Molecular Function: protein serine/threonine kinase activity (GO:0004674);; Molecular Function: ATP binding (GO:0005524);; Biological Process: protein phosphorylation (GO:0006468);; Biological Process: response to stress (GO:0006950);; Biological Process: abscisic acid-activated signaling pathway (GO:0009738);;	K14498|7.36783e-83|sita:101765115|serine/threonine-protein kinase SAPK4-like; K14498 serine/threonine-protein kinase SRK2 [EC:2.7.11.1] (A)	[T]	Signal transduction mechanisms	Protein kinase domain;; Protein kinase domain;; Protein tyrosine kinase	Serine/threonine-protein kinase SAPK4 OS=Oryza sativa subsp. japonica (Rice) PE=2 SV=2	T	Signal transduction mechanisms	PREDICTED: serine/threonine-protein kinase SAPK4-like [Setaria italica]	biological process: metabolic process (GO:0008152);; biological process: cellular process (GO:0009987);; molecular function: catalytic activity (GO:0003824);; molecular function: binding (GO:0005488);; biological process: response to stimulus (GO:0050896);; biological process: signaling (GO:0023052);; biological process: single-organism process (GO:0044699);; biological process: biological regula…	Plant hormone signal transduction (ko04075)
BMK_Unigene_045061	CAMK_OST1L	PK	23.4017	36.8798	31.8348	25.9692	28.8368	26.1228	1.88312e-05	1.66826	up	0.0642757	1.00134	normal	0.751897	0.636007	normal	0.408732	0.737738	normal	[RTKL]	--	Molecular Function: protein serine/threonine kinase activity (GO:0004674);; Molecular Function: ATP binding (GO:0005524);; Cellular Component: nucleus (GO:0005634);; Cellular Component: cytosol (GO:0005829);; Biological Process: protein phosphorylation (GO:0006468);; Biological Process: response to salt stress (GO:0009651);; Biological Process: abscisic acid-activated signaling pathway (GO:000973…	K14498|0|sita:101775125|serine/threonine-protein kinase SAPK1-like; K14498 serine/threonine-protein kinase SRK2 [EC:2.7.11.1] (A)	[T]	Signal transduction mechanisms	Protein kinase domain;; Protein tyrosine kinase	Serine/threonine-protein kinase SAPK1 GN=OOSJNBa0017N12.8 OS=Oryza sativa subsp. japonica (Rice) PE=1 SV=1	T	Signal transduction mechanisms	PREDICTED: serine/threonine-protein kinase SAPK1-like [Setaria italica]	biological process: metabolic process (GO:0008152);; biological process: cellular process (GO:0009987);; molecular function: catalytic activity (GO:0003824);; molecular function: binding (GO:0005488);; cellular component: cell (GO:0005623);; cellular component: organelle (GO:0043226);; cellular component: cell part (GO:0044464);; biological process: response to stimulus (GO:0050896);; biological …	Plant hormone signal transduction (ko04075)
BMK_Unigene_045339	CAMK_OST1L	PK	0.217572	2.92	0.569195	0	0	0	0.000408385	3.83136	up	0.561534	1.54696	normal	--	--	--	--	--	--	[RTKL]	--	Molecular Function: transferase activity, transferring phosphorus-containing groups (GO:0016772);;	K08796|2.63292e-31|gsl:Gasu_10050|serine/threonine protein kinase (EC:2.7.11.1); K08796 BR serine/threonine kinase [EC:2.7.11.1] (A)	[D]	Cell cycle control, cell division, chromosome partitioning	Protein kinase domain;; Protein tyrosine kinase	Putative CBL-interacting protein kinase 13 OS=Oryza sativa subsp. japonica (Rice) PE=3 SV=1	T	Signal transduction mechanisms	protein kinase, putative [Phytophthora infestans T30-4]	biological process: metabolic process (GO:0008152);; molecular function: catalytic activity (GO:0003824)	--
BMK_Unigene_058990	CAMK_OST1L	PK	0	0.346983	0	0	0	0	0.60326	1.69398	normal	--	--	--	--	--	--	--	--	--	[RTKL]	--	Molecular Function: protein serine/threonine kinase activity (GO:0004674);; Molecular Function: ATP binding (GO:0005524);; Biological Process: protein phosphorylation (GO:0006468);;	K07198|1.93511e-13|ccp:CHC_T00008503001|Serine/threonine-protein kinase; K07198 5'-AMP-activated protein kinase, catalytic alpha subunit [EC:2.7.11.11] (A)	[D]	Cell cycle control, cell division, chromosome partitioning	Protein kinase domain	CBL-interacting protein kinase 1 GN=P0706B05.31 OS=Oryza sativa subsp. japonica (Rice) PE=2 SV=1	T	Signal transduction mechanisms	serine/threonine protein kinase putative [Albugo laibachii Nc14]	biological process: metabolic process (GO:0008152);; biological process: cellular process (GO:0009987);; molecular function: catalytic activity (GO:0003824);; molecular function: binding (GO:0005488)	--
BMK_Unigene_077592	CAMK_OST1L	PK	0	1.59476	0.467875	2.97456	0.177577	2.03893	0.105453	3.78057	normal	0.650012	1.60587	normal	0.354505	-2.31162	normal	0.7695	-0.752005	normal	[RTKL]	--	Molecular Function: protein kinase activity (GO:0004672);; Molecular Function: ATP binding (GO:0005524);; Biological Process: protein phosphorylation (GO:0006468);;	--	[D]	Cell cycle control, cell division, chromosome partitioning	Protein kinase domain;; Protein tyrosine kinase;; Lipopolysaccharide kinase (Kdo/WaaP) family	Cyclin-dependent kinase F-3 GN=OSJNBb0043P23.8 OS=Oryza sativa subsp. japonica (Rice) PE=2 SV=1	T	Signal transduction mechanisms	CAMK protein kinase [Phytophthora parasitica INRA-310]	biological process: metabolic process (GO:0008152);; biological process: cellular process (GO:0009987);; molecular function: catalytic activity (GO:0003824);; molecular function: binding (GO:0005488)	--
BMK_Unigene_079187	CAMK_OST1L	PK	0.440421	0	0	0.867804	0.690493	0.656796	0.135112	-3.53141	normal	0.179681	-3.34869	normal	0.993445	-0.0247571	normal	0.978771	-0.0609922	normal	[RTKL]	--	Molecular Function: protein serine/threonine kinase activity (GO:0004674);; Molecular Function: ATP binding (GO:0005524);; Biological Process: protein phosphorylation (GO:0006468);;	--	[D]	Cell cycle control, cell division, chromosome partitioning	Protein kinase domain	--	T	Signal transduction mechanisms	hypothetical protein SNOG_09194 [Phaeosphaeria nodorum SN15]	biological process: metabolic process (GO:0008152);; biological process: cellular process (GO:0009987);; molecular function: catalytic activity (GO:0003824);; molecular function: binding (GO:0005488)	--
BMK_Unigene_084958	CAMK_OST1L	PK	4.69804	2.83	0.969079	6.59641	3.84267	4.26203	0.501726	1.08299	normal	0.852577	-0.474562	normal	0.73203	-1.18808	normal	0.799707	-0.398982	normal	[RTKL]	--	Molecular Function: protein serine/threonine kinase activity (GO:0004674);; Molecular Function: ATP binding (GO:0005524);; Biological Process: protein phosphorylation (GO:0006468);; Biological Process: response to stress (GO:0006950);; Biological Process: abscisic acid-activated signaling pathway (GO:0009738);;	K14498|1.231e-83|zma:100502543|SnRK2.4; K14498 serine/threonine-protein kinase SRK2 [EC:2.7.11.1] (A)	[T]	Signal transduction mechanisms	Protein kinase domain	Serine/threonine-protein kinase SAPK4 OS=Oryza sativa subsp. japonica (Rice) PE=2 SV=2	--	--	PREDICTED: uncharacterized protein LOC100384302 isoform X1 [Zea mays]	biological process: metabolic process (GO:0008152);; biological process: cellular process (GO:0009987);; molecular function: catalytic activity (GO:0003824);; molecular function: binding (GO:0005488);; biological process: response to stimulus (GO:0050896);; biological process: signaling (GO:0023052);; biological process: single-organism process (GO:0044699);; biological process: biological regula…	Plant hormone signal transduction (ko04075)
BMK_Unigene_087043	CAMK_OST1L	PK	45.2272	56.9665	49.6814	44.1663	60.9233	39.8921	0.193434	0.702342	normal	0.343414	0.647406	normal	0.257277	0.740474	normal	0.699326	0.235516	normal	[RTKL]	--	Molecular Function: protein serine/threonine kinase activity (GO:0004674);; Molecular Function: ATP binding (GO:0005524);; Cellular Component: nucleus (GO:0005634);; Cellular Component: cytoplasm (GO:0005737);; Biological Process: protein phosphorylation (GO:0006468);; Biological Process: response to salt stress (GO:0009651);; Biological Process: abscisic acid-activated signaling pathway (GO:0009…	K14498|7.5584e-171|sbi:SORBI_04g022410|SORBIDRAFT_04g022410, Sb04g022410; hypothetical protein; K14498 serine/threonine-protein kinase SRK2 [EC:2.7.11.1] (A)	[T]	Signal transduction mechanisms	Protein kinase domain;; Protein tyrosine kinase	Serine/threonine-protein kinase SAPK6 OS=Oryza sativa subsp. japonica (Rice) PE=2 SV=1	T	Signal transduction mechanisms	PREDICTED: serine/threonine-protein kinase SAPK6-like isoform X2 [Setaria italica]	biological process: metabolic process (GO:0008152);; biological process: cellular process (GO:0009987);; molecular function: catalytic activity (GO:0003824);; molecular function: binding (GO:0005488);; cellular component: cell (GO:0005623);; cellular component: organelle (GO:0043226);; cellular component: cell part (GO:0044464);; biological process: response to stimulus (GO:0050896);; biological …	Plant hormone signal transduction (ko04075)
BMK_Unigene_103087	CAMK_OST1L	PK	0	0.124598	0.375774	0	0	0	--	--	--	0.650012	1.56569	normal	--	--	--	--	--	--	[RTKL]	--	Molecular Function: protein serine/threonine kinase activity (GO:0004674);; Molecular Function: ATP binding (GO:0005524);; Biological Process: protein phosphorylation (GO:0006468);;	K07359|1.31399e-08|mis:MICPUN_82799|hypothetical protein; K07359 calcium/calmodulin-dependent protein kinase kinase [EC:2.7.11.17] (A)	[T]	Signal transduction mechanisms	Protein kinase domain;; Protein tyrosine kinase	Serine/threonine-protein kinase Nek6 GN=OSJNBa0006O15.28 OS=Oryza sativa subsp. japonica (Rice) PE=3 SV=2	T	Signal transduction mechanisms	hypothetical protein FGSG_12149, partial [Fusarium graminearum PH-1]	biological process: metabolic process (GO:0008152);; biological process: cellular process (GO:0009987);; molecular function: catalytic activity (GO:0003824);; molecular function: binding (GO:0005488)	--
BMK_Unigene_106606	CAMK_OST1L	PK	0	0.0756444	0.480901	0	0	0	--	--	--	0.510737	2.18826	normal	--	--	--	--	--	--	[RTKL]	--	Molecular Function: protein serine/threonine kinase activity (GO:0004674);; Molecular Function: ATP binding (GO:0005524);; Biological Process: protein phosphorylation (GO:0006468);;	K12761|5.89359e-06|tcc:TCM_019732|CBL-interacting protein kinase 08 (A)	[T]	Signal transduction mechanisms	Protein kinase domain;; Protein tyrosine kinase	--	T	Signal transduction mechanisms	Negative regulator of sexual conjugation and meiosis [Fusarium oxysporum f. sp. cubense race 1]	biological process: metabolic process (GO:0008152);; biological process: cellular process (GO:0009987);; molecular function: catalytic activity (GO:0003824);; molecular function: binding (GO:0005488)	--
BMK_Unigene_002182	CK1_CK1	PK	13.0445	10.7801	11.7239	15.9756	12.6755	12.4091	0.865193	0.102196	normal	0.600811	0.368995	normal	0.963866	-0.0526129	normal	0.978771	0.0144627	normal	[RTKL]	--	Molecular Function: protein serine/threonine kinase activity (GO:0004674);; Molecular Function: ATP binding (GO:0005524);; Cellular Component: nucleus (GO:0005634);; Cellular Component: cytoplasm (GO:0005737);; Biological Process: protein phosphorylation (GO:0006468);;	--	[T]	Signal transduction mechanisms	Protein kinase domain;; Protein tyrosine kinase	Casein kinase I isoform delta-like GN=At4g26100 OS=Arabidopsis thaliana (Mouse-ear cress) PE=2 SV=2	T	Signal transduction mechanisms	PREDICTED: casein kinase I isoform delta-like isoform X1 [Setaria italica]	biological process: metabolic process (GO:0008152);; biological process: cellular process (GO:0009987);; molecular function: catalytic activity (GO:0003824);; molecular function: binding (GO:0005488);; cellular component: cell (GO:0005623);; cellular component: organelle (GO:0043226);; cellular component: cell part (GO:0044464)	--
BMK_Unigene_010324	CK1_CK1	PK	64.7411	81.5354	73.3828	45.6655	71.1762	49.1156	0.115849	0.706402	normal	0.135432	0.699572	normal	0.0344444	0.905417	normal	0.287413	0.476281	normal	[RTKL]	--	Molecular Function: protein serine/threonine kinase activity (GO:0004674);; Molecular Function: protein serine/threonine/tyrosine kinase activity (GO:0004712);; Molecular Function: ATP binding (GO:0005524);; Cellular Component: nucleus (GO:0005634);; Cellular Component: cytoplasm (GO:0005737);; Biological Process: protein phosphorylation (GO:0006468);;	--	[T]	Signal transduction mechanisms	Protein kinase domain;; Protein tyrosine kinase	Casein kinase I isoform delta-like GN=At4g26100 OS=Arabidopsis thaliana (Mouse-ear cress) PE=2 SV=2	T	Signal transduction mechanisms	PREDICTED: casein kinase I isoform delta-like isoform X7 [Setaria italica]	biological process: metabolic process (GO:0008152);; biological process: cellular process (GO:0009987);; molecular function: catalytic activity (GO:0003824);; molecular function: binding (GO:0005488);; cellular component: cell (GO:0005623);; cellular component: organelle (GO:0043226);; cellular component: cell part (GO:0044464)	--
BMK_Unigene_014846	CK1_CK1	PK	22.5542	11.0325	13.9261	27.8626	20.5031	18.614	0.297439	-0.613544	normal	0.769238	-0.201624	normal	0.886511	-0.164495	normal	0.764186	-0.167904	normal	[RTKL]	--	Molecular Function: protein serine/threonine kinase activity (GO:0004674);; Molecular Function: ATP binding (GO:0005524);; Cellular Component: nucleus (GO:0005634);; Cellular Component: mitochondrion (GO:0005739);; Cellular Component: plasma membrane (GO:0005886);; Biological Process: protein phosphorylation (GO:0006468);; Cellular Component: plasmodesma (GO:0009506);;	K02218|2.87942e-149|sita:101771373|casein kinase I isoform delta-like; K02218 casein kinase 1 [EC:2.7.11.1] (A)	[T]	Signal transduction mechanisms	Protein kinase domain;; Protein tyrosine kinase	Casein kinase I isoform delta-like GN=At4g26100 OS=Arabidopsis thaliana (Mouse-ear cress) PE=2 SV=2	T	Signal transduction mechanisms	PREDICTED: casein kinase I isoform delta-like [Setaria italica]	biological process: metabolic process (GO:0008152);; biological process: cellular process (GO:0009987);; molecular function: catalytic activity (GO:0003824);; molecular function: binding (GO:0005488);; cellular component: cell (GO:0005623);; cellular component: organelle (GO:0043226);; cellular component: cell part (GO:0044464);; cellular component: membrane (GO:0016020);; cellular component: cel…	--
BMK_Unigene_017039	CK1_CK1	PK	1.09641	1.56539	0.536161	0.0101813	0.358874	0	0.60326	0.854207	normal	0.866679	-0.368581	normal	0.142792	2.96671	normal	--	--	--	[RTKL]	--	Cellular Component: fungal-type vacuole membrane (GO:0000329);; Biological Process: cell morphogenesis (GO:0000902);; Biological Process: cytokinesis (GO:0000910);; Molecular Function: protein serine/threonine kinase activity (GO:0004674);; Molecular Function: ATP binding (GO:0005524);; Cellular Component: mitochondrion (GO:0005739);; Cellular Component: endoplasmic reticulum (GO:0005783);; Cellu…	K02218|1.04564e-116|mdm:103415870|casein kinase I isoform delta-like; K02218 casein kinase 1 [EC:2.7.11.1] (A)	[T]	Signal transduction mechanisms	Protein kinase domain;; Protein tyrosine kinase	Casein kinase I isoform delta-like GN=At4g26100 OS=Arabidopsis thaliana (Mouse-ear cress) PE=2 SV=2	T	Signal transduction mechanisms	CK1/CK1/CK1-G protein kinase [Gaeumannomyces graminis var. tritici R3-111a-1]	cellular component: cell (GO:0005623);; cellular component: membrane (GO:0016020);; cellular component: organelle (GO:0043226);; cellular component: organelle part (GO:0044422);; cellular component: cell part (GO:0044464);; biological process: cellular process (GO:0009987);; biological process: developmental process (GO:0032502);; biological process: single-organism process (GO:0044699);; biologi…	--
BMK_Unigene_017410	CK1_CK1	PK	2.73454	3.06358	2.27532	0	0.754928	0.240799	0.665595	0.503215	normal	0.885848	0.298647	normal	0.113551	3.16964	normal	0.301136	2.2879	normal	[RTKL]	--	Molecular Function: protein serine/threonine kinase activity (GO:0004674);; Molecular Function: ATP binding (GO:0005524);; Biological Process: protein phosphorylation (GO:0006468);;	K02218|2.6657e-144|mpp:MICPUCDRAFT_45412|hypothetical protein; K02218 casein kinase 1 [EC:2.7.11.1] (A)	[T]	Signal transduction mechanisms	Protein kinase domain;; Protein tyrosine kinase;; Phosphotransferase enzyme family	Casein kinase I isoform delta-like GN=At4g26100 OS=Arabidopsis thaliana (Mouse-ear cress) PE=2 SV=2	T	Signal transduction mechanisms	casein kinase i [Colletotrichum gloeosporioides Nara gc5]	biological process: metabolic process (GO:0008152);; biological process: cellular process (GO:0009987);; molecular function: catalytic activity (GO:0003824);; molecular function: binding (GO:0005488)	--
BMK_Unigene_018371	CK1_CK1	PK	73.9975	62.0442	58.6314	70.1968	69.7911	61.1827	0.665206	0.198123	normal	0.705568	0.202264	normal	0.751897	0.301243	normal	0.550119	0.327674	normal	[RTKL]	--	Molecular Function: protein serine/threonine kinase activity (GO:0004674);; Molecular Function: ATP binding (GO:0005524);; Cellular Component: nucleus (GO:0005634);; Cellular Component: mitochondrion (GO:0005739);; Cellular Component: plasma membrane (GO:0005886);; Biological Process: protein phosphorylation (GO:0006468);; Cellular Component: plasmodesma (GO:0009506);;	K02218|0|sita:101755509|casein kinase I isoform delta-like; K02218 casein kinase 1 [EC:2.7.11.1] (A)	[T]	Signal transduction mechanisms	Protein kinase domain;; Protein tyrosine kinase	Casein kinase I isoform delta-like GN=At4g26100 OS=Arabidopsis thaliana (Mouse-ear cress) PE=2 SV=2	T	Signal transduction mechanisms	PREDICTED: casein kinase I isoform delta-like isoform X1 [Setaria italica]	biological process: metabolic process (GO:0008152);; biological process: cellular process (GO:0009987);; molecular function: catalytic activity (GO:0003824);; molecular function: binding (GO:0005488);; cellular component: cell (GO:0005623);; cellular component: organelle (GO:0043226);; cellular component: cell part (GO:0044464);; cellular component: membrane (GO:0016020);; cellular component: cel…	--
BMK_Unigene_028225	CK1_CK1	PK	0.451337	0.134841	0.176257	0	0	0.505531	0.747366	-0.895737	normal	0.843611	-0.588777	normal	--	--	--	0.222954	2.53402	normal	[RTKL]	--	Cellular Component: fungal-type vacuole membrane (GO:0000329);; Biological Process: cell morphogenesis (GO:0000902);; Biological Process: cytokinesis (GO:0000910);; Molecular Function: protein serine/threonine kinase activity (GO:0004674);; Molecular Function: ATP binding (GO:0005524);; Cellular Component: mitochondrion (GO:0005739);; Cellular Component: endoplasmic reticulum (GO:0005783);; Cellu…	K02218|2.33027e-52|zma:103636222|casein kinase I isoform delta-like; K02218 casein kinase 1 [EC:2.7.11.1] (A)	[T]	Signal transduction mechanisms	Protein kinase domain;; Protein tyrosine kinase	Casein kinase I isoform delta-like GN=At4g26100 OS=Arabidopsis thaliana (Mouse-ear cress) PE=2 SV=2	T	Signal transduction mechanisms	hypothetical protein S40285_01328 [Stachybotrys chlorohalonata IBT 40285]	cellular component: cell (GO:0005623);; cellular component: membrane (GO:0016020);; cellular component: organelle (GO:0043226);; cellular component: organelle part (GO:0044422);; cellular component: cell part (GO:0044464);; biological process: cellular process (GO:0009987);; biological process: developmental process (GO:0032502);; biological process: single-organism process (GO:0044699);; biologi…	--
BMK_Unigene_030555	CK1_CK1	PK	0	0.521789	0.0380147	0.873038	0	0.0397549	0.0742854	3.94633	normal	--	--	--	0.295367	-2.54842	normal	0.29704	-2.25885	normal	[RTKL]	--	Molecular Function: protein serine/threonine kinase activity (GO:0004674);; Molecular Function: ATP binding (GO:0005524);; Cellular Component: nucleus (GO:0005634);; Cellular Component: cytoplasm (GO:0005737);; Cellular Component: plasma membrane (GO:0005886);; Biological Process: protein phosphorylation (GO:0006468);; Cellular Component: plasmodesma (GO:0009506);;	K02218|3.81162e-96|ppp:PHYPADRAFT_141762|hypothetical protein; K02218 casein kinase 1 [EC:2.7.11.1] (A)	[T]	Signal transduction mechanisms	Protein kinase domain;; Protein tyrosine kinase;; Phosphotransferase enzyme family	Casein kinase I isoform delta-like GN=At4g26100 OS=Arabidopsis thaliana (Mouse-ear cress) PE=2 SV=2	T	Signal transduction mechanisms	hypothetical protein EUGRSUZ_F03150 [Eucalyptus grandis]	biological process: metabolic process (GO:0008152);; biological process: cellular process (GO:0009987);; molecular function: catalytic activity (GO:0003824);; molecular function: binding (GO:0005488);; cellular component: cell (GO:0005623);; cellular component: organelle (GO:0043226);; cellular component: cell part (GO:0044464);; cellular component: membrane (GO:0016020);; cellular component: cel…	--
BMK_Unigene_033513	CK1_CK1	PK	9.35547	4.20277	6.51453	9.90539	7.5509	7.10046	0.86878	-0.316797	normal	0.921796	-0.222625	normal	0.982788	0.114834	normal	0.639545	0.952031	normal	[RTKL]	--	Molecular Function: protein serine/threonine kinase activity (GO:0004674);; Molecular Function: ATP binding (GO:0005524);; Cellular Component: nucleus (GO:0005634);; Cellular Component: mitochondrion (GO:0005739);; Cellular Component: plasma membrane (GO:0005886);; Biological Process: protein phosphorylation (GO:0006468);; Cellular Component: plasmodesma (GO:0009506);;	K02218|4.95833e-70|zma:103636222|casein kinase I isoform delta-like; K02218 casein kinase 1 [EC:2.7.11.1] (A)	[T]	Signal transduction mechanisms	Protein kinase domain;; Protein tyrosine kinase	Casein kinase I isoform delta-like GN=At4g26100 OS=Arabidopsis thaliana (Mouse-ear cress) PE=2 SV=2	T	Signal transduction mechanisms	putative protein kinase ADK1 [Oryza sativa Japonica Group]	biological process: metabolic process (GO:0008152);; biological process: cellular process (GO:0009987);; molecular function: catalytic activity (GO:0003824);; molecular function: binding (GO:0005488);; cellular component: cell (GO:0005623);; cellular component: organelle (GO:0043226);; cellular component: cell part (GO:0044464);; cellular component: membrane (GO:0016020);; cellular component: cel…	--
BMK_Unigene_037078	CK1_CK1	PK	11.3636	9.16653	15.9189	12.6097	9.96132	11.8506	0.938492	0.0718623	normal	0.157103	1.02037	normal	0.965165	-0.0732552	normal	0.699326	0.285849	normal	[RTKL]	--	Molecular Function: protein serine/threonine kinase activity (GO:0004674);; Molecular Function: ATP binding (GO:0005524);; Cellular Component: nucleus (GO:0005634);; Cellular Component: cytoplasm (GO:0005737);; Biological Process: protein phosphorylation (GO:0006468);;	--	[T]	Signal transduction mechanisms	Protein kinase domain;; Protein tyrosine kinase	Casein kinase I isoform delta-like GN=At4g26100 OS=Arabidopsis thaliana (Mouse-ear cress) PE=2 SV=2	T	Signal transduction mechanisms	PREDICTED: casein kinase I isoform delta-like isoform X8 [Setaria italica]	biological process: metabolic process (GO:0008152);; biological process: cellular process (GO:0009987);; molecular function: catalytic activity (GO:0003824);; molecular function: binding (GO:0005488);; cellular component: cell (GO:0005623);; cellular component: organelle (GO:0043226);; cellular component: cell part (GO:0044464)	--
BMK_Unigene_044892	CK1_CK1	PK	7.7457	11.7922	27.9719	5.72701	12.3228	24.4182	0.00704708	2.71492	up	0.00154573	3.31641	up	0.119985	2.17135	normal	0.00790489	2.65911	up	[RTKL]	--	Molecular Function: protein serine/threonine kinase activity (GO:0004674);; Molecular Function: ATP binding (GO:0005524);; Cellular Component: nucleus (GO:0005634);; Biological Process: protein phosphorylation (GO:0006468);; Biological Process: response to brassinosteroid (GO:0009741);; Biological Process: unidimensional cell growth (GO:0009826);; Biological Process: auxin metabolic process (GO:0…	--	[T]	Signal transduction mechanisms	Protein kinase domain;; Protein tyrosine kinase;; Protein kinase domain	Casein kinase I isoform delta-like GN=At4g26100 OS=Arabidopsis thaliana (Mouse-ear cress) PE=2 SV=2	--	--	PREDICTED: casein kinase I isoform delta-like [Setaria italica]	biological process: metabolic process (GO:0008152);; biological process: cellular process (GO:0009987);; molecular function: catalytic activity (GO:0003824);; molecular function: binding (GO:0005488);; cellular component: cell (GO:0005623);; cellular component: organelle (GO:0043226);; cellular component: cell part (GO:0044464);; biological process: response to stimulus (GO:0050896);; biological …	--
BMK_Unigene_045247	CK1_CK1	PK	9.07033	7.00137	5.95963	5.82096	4.10219	3.79324	0.859038	-0.166307	normal	0.861125	-0.227049	normal	0.896971	-0.21506	normal	0.777385	-0.241523	normal	[RTKL]	--	Molecular Function: protein serine/threonine kinase activity (GO:0004674);; Molecular Function: protein tyrosine kinase activity (GO:0004713);; Molecular Function: ATP binding (GO:0005524);; Cellular Component: nucleus (GO:0005634);; Cellular Component: cytoplasm (GO:0005737);; Biological Process: protein phosphorylation (GO:0006468);;	--	[T]	Signal transduction mechanisms	Protein kinase domain;; Protein tyrosine kinase	Casein kinase I isoform delta-like GN=At4g26100 OS=Arabidopsis thaliana (Mouse-ear cress) PE=2 SV=2	T	Signal transduction mechanisms	PREDICTED: casein kinase I isoform delta-like isoform X1 [Setaria italica]	biological process: metabolic process (GO:0008152);; biological process: cellular process (GO:0009987);; molecular function: catalytic activity (GO:0003824);; biological process: single-organism process (GO:0044699);; molecular function: binding (GO:0005488);; cellular component: cell (GO:0005623);; cellular component: organelle (GO:0043226);; cellular component: cell part (GO:0044464)	--
BMK_Unigene_048249	CK1_CK1	PK	129.563	181.617	179.943	102.597	190.086	144.872	0.0345699	0.972481	normal	0.0227147	1.13218	normal	0.0438787	1.03117	normal	0.265515	0.519771	normal	[RTKL]	--	Molecular Function: protein serine/threonine kinase activity (GO:0004674);; Molecular Function: ATP binding (GO:0005524);; Cellular Component: nucleus (GO:0005634);; Cellular Component: cytoplasm (GO:0005737);; Cellular Component: plasma membrane (GO:0005886);; Biological Process: protein phosphorylation (GO:0006468);; Cellular Component: plasmodesma (GO:0009506);;	K02218|0|sbi:SORBI_03g032560|SORBIDRAFT_03g032560, Sb03g032560; hypothetical protein; K02218 casein kinase 1 [EC:2.7.11.1] (A)	[T]	Signal transduction mechanisms	Protein kinase domain;; Protein tyrosine kinase;; Phosphotransferase enzyme family	Casein kinase I isoform delta-like GN=At4g26100 OS=Arabidopsis thaliana (Mouse-ear cress) PE=2 SV=2	T	Signal transduction mechanisms	hypothetical protein SORBIDRAFT_03g032560 [Sorghum bicolor]	biological process: metabolic process (GO:0008152);; biological process: cellular process (GO:0009987);; molecular function: catalytic activity (GO:0003824);; molecular function: binding (GO:0005488);; cellular component: cell (GO:0005623);; cellular component: organelle (GO:0043226);; cellular component: cell part (GO:0044464);; cellular component: membrane (GO:0016020);; cellular component: cel…	--
BMK_Unigene_052543	CK1_CK1	PK	1.60347	0.885348	0.775501	0.0711663	0	0.0531517	0.825123	-0.397072	normal	0.739642	-0.497527	normal	0.751897	-0.962919	normal	0.990016	-0.0344044	normal	[RTKL]	--	Molecular Function: protein serine/threonine kinase activity (GO:0004674);; Molecular Function: ATP binding (GO:0005524);; Biological Process: protein phosphorylation (GO:0006468);;	K02218|0|mis:MICPUN_81419|hypothetical protein; K02218 casein kinase 1 [EC:2.7.11.1] (A)	[T]	Signal transduction mechanisms	Protein kinase domain;; Protein tyrosine kinase	Casein kinase I isoform delta-like GN=At4g26100 OS=Arabidopsis thaliana (Mouse-ear cress) PE=2 SV=2	--	--	CK1/CK1/CK1-D protein kinase [Phytophthora parasitica INRA-310]	biological process: metabolic process (GO:0008152);; biological process: cellular process (GO:0009987);; molecular function: catalytic activity (GO:0003824);; molecular function: binding (GO:0005488)	--
BMK_Unigene_075545	CK1_CK1	PK	0.354417	0	0	1.00534	0.756673	1.00431	0.0336214	-4.36537	normal	0.0528585	-4.13443	normal	0.985982	-0.0862151	normal	0.860703	0.31257	normal	[RTKL]	--	Cellular Component: fungal-type vacuole membrane (GO:0000329);; Biological Process: cell morphogenesis (GO:0000902);; Biological Process: cytokinesis (GO:0000910);; Molecular Function: protein serine/threonine kinase activity (GO:0004674);; Molecular Function: ATP binding (GO:0005524);; Cellular Component: mitochondrion (GO:0005739);; Cellular Component: endoplasmic reticulum (GO:0005783);; Cellu…	K02218|3.24475e-119|cvr:CHLNCDRAFT_32696|hypothetical protein; K02218 casein kinase 1 [EC:2.7.11.1] (A)	[T]	Signal transduction mechanisms	Protein kinase domain;; Protein tyrosine kinase	Casein kinase I isoform delta-like GN=At4g26100 OS=Arabidopsis thaliana (Mouse-ear cress) PE=2 SV=2	T	Signal transduction mechanisms	hypothetical protein SNOG_05017 [Phaeosphaeria nodorum SN15]	cellular component: cell (GO:0005623);; cellular component: membrane (GO:0016020);; cellular component: organelle (GO:0043226);; cellular component: organelle part (GO:0044422);; cellular component: cell part (GO:0044464);; biological process: cellular process (GO:0009987);; biological process: developmental process (GO:0032502);; biological process: single-organism process (GO:0044699);; biologi…	--
BMK_Unigene_075785	CK1_CK1	PK	1.35898	2.55672	1.00044	2.06408	2.06686	1.5692	0.452156	1.26196	normal	0.955778	0.157491	normal	0.927477	0.243446	normal	0.972123	-0.0813323	normal	[RTKL]	--	Molecular Function: protein serine/threonine kinase activity (GO:0004674);; Molecular Function: ATP binding (GO:0005524);; Cellular Component: nucleus (GO:0005634);; Biological Process: protein phosphorylation (GO:0006468);; Biological Process: response to brassinosteroid (GO:0009741);; Biological Process: unidimensional cell growth (GO:0009826);; Biological Process: auxin metabolic process (GO:0…	--	[T]	Signal transduction mechanisms	Protein kinase domain;; Protein tyrosine kinase	Casein kinase I isoform delta-like GN=At4g26100 OS=Arabidopsis thaliana (Mouse-ear cress) PE=2 SV=2	T	Signal transduction mechanisms	PREDICTED: casein kinase I isoform delta-like [Setaria italica]	biological process: metabolic process (GO:0008152);; biological process: cellular process (GO:0009987);; molecular function: catalytic activity (GO:0003824);; molecular function: binding (GO:0005488);; cellular component: cell (GO:0005623);; cellular component: organelle (GO:0043226);; cellular component: cell part (GO:0044464);; biological process: response to stimulus (GO:0050896);; biological …	--
BMK_Unigene_085874	CK1_CK1	PK	9.93186	14.4313	34.4623	7.686	15.5604	30.3087	0.60326	0.593828	normal	0.0250077	1.83762	normal	0.751897	0.434299	normal	0.173884	0.938232	normal	[RTKL]	--	Molecular Function: protein serine/threonine kinase activity (GO:0004674);; Molecular Function: ATP binding (GO:0005524);; Cellular Component: nucleus (GO:0005634);; Biological Process: protein phosphorylation (GO:0006468);; Biological Process: response to brassinosteroid (GO:0009741);; Biological Process: unidimensional cell growth (GO:0009826);; Biological Process: auxin metabolic process (GO:0…	--	[T]	Signal transduction mechanisms	Protein kinase domain;; Protein tyrosine kinase	Casein kinase I isoform delta-like GN=At4g26100 OS=Arabidopsis thaliana (Mouse-ear cress) PE=2 SV=2	--	--	PREDICTED: casein kinase I isoform delta-like [Setaria italica]	biological process: metabolic process (GO:0008152);; biological process: cellular process (GO:0009987);; molecular function: catalytic activity (GO:0003824);; molecular function: binding (GO:0005488);; cellular component: cell (GO:0005623);; cellular component: organelle (GO:0043226);; cellular component: cell part (GO:0044464);; biological process: response to stimulus (GO:0050896);; biological …	--
BMK_Unigene_087064	CK1_CK1	PK	0.276642	0.306796	0.0419078	1.3575	0.23149	0.825981	0.715069	0.627611	normal	0.401849	-2.08491	normal	0.430407	-1.81081	normal	0.908963	-0.264407	normal	[RTKL]	--	Molecular Function: protein serine/threonine kinase activity (GO:0004674);; Molecular Function: ATP binding (GO:0005524);; Biological Process: protein phosphorylation (GO:0006468);;	K02218|1.2407e-168|ppp:PHYPADRAFT_141762|hypothetical protein; K02218 casein kinase 1 [EC:2.7.11.1] (A)	[T]	Signal transduction mechanisms	Protein kinase domain;; Protein tyrosine kinase	Casein kinase I isoform delta-like GN=At4g26100 OS=Arabidopsis thaliana (Mouse-ear cress) PE=2 SV=2	T	Signal transduction mechanisms	hypothetical protein PHYSODRAFT_354770 [Phytophthora sojae]	biological process: metabolic process (GO:0008152);; biological process: cellular process (GO:0009987);; molecular function: catalytic activity (GO:0003824);; molecular function: binding (GO:0005488)	--
BMK_Unigene_088467	CK1_CK1	PK	133.128	185.565	182.196	103.047	191.95	151.562	0.0297112	0.923764	normal	0.061181	0.879291	normal	0.00859908	1.15379	up	8.08192e-05	1.24875	up	[RTKL]	--	Molecular Function: protein serine/threonine kinase activity (GO:0004674);; Molecular Function: ATP binding (GO:0005524);; Cellular Component: nucleus (GO:0005634);; Cellular Component: cytoplasm (GO:0005737);; Cellular Component: plasma membrane (GO:0005886);; Biological Process: protein phosphorylation (GO:0006468);; Cellular Component: plasmodesma (GO:0009506);;	K02218|0|sbi:SORBI_03g032560|SORBIDRAFT_03g032560, Sb03g032560; hypothetical protein; K02218 casein kinase 1 [EC:2.7.11.1] (A)	[T]	Signal transduction mechanisms	Protein kinase domain;; Protein tyrosine kinase;; Phosphotransferase enzyme family	Casein kinase I isoform delta-like GN=At4g26100 OS=Arabidopsis thaliana (Mouse-ear cress) PE=2 SV=2	T	Signal transduction mechanisms	hypothetical protein SORBIDRAFT_03g032560 [Sorghum bicolor]	biological process: metabolic process (GO:0008152);; biological process: cellular process (GO:0009987);; molecular function: catalytic activity (GO:0003824);; molecular function: binding (GO:0005488);; cellular component: cell (GO:0005623);; cellular component: organelle (GO:0043226);; cellular component: cell part (GO:0044464);; cellular component: membrane (GO:0016020);; cellular component: cel…	--
BMK_Unigene_004766	CK1_CK1-Pl	PK	50.7337	54.9214	45.8177	48.6077	59.232	46.5508	0.312146	0.484776	normal	0.58692	0.364369	normal	0.345364	0.554123	normal	0.533668	0.31128	normal	[RTKL]	--	Molecular Function: protein serine/threonine kinase activity (GO:0004674);; Molecular Function: ATP binding (GO:0005524);; Biological Process: protein phosphorylation (GO:0006468);;	--	[T]	Signal transduction mechanisms	Protein kinase domain;; Protein tyrosine kinase	Casein kinase I isoform delta-like GN=At4g26100 OS=Arabidopsis thaliana (Mouse-ear cress) PE=2 SV=2	--	--	PREDICTED: uncharacterized protein LOC101773166 isoform X4 [Setaria italica]	biological process: metabolic process (GO:0008152);; biological process: cellular process (GO:0009987);; molecular function: catalytic activity (GO:0003824);; molecular function: binding (GO:0005488)	--
BMK_Unigene_007423	CK1_CK1-Pl	PK	14.8004	9.8139	11.7552	17.145	13.9015	12.8893	0.753264	-0.210673	normal	0.812636	0.188932	normal	0.987796	-0.0186097	normal	0.974574	-0.0280256	normal	[RTKL]	--	Molecular Function: protein serine/threonine kinase activity (GO:0004674);; Molecular Function: ATP binding (GO:0005524);; Cellular Component: mitochondrion (GO:0005739);; Biological Process: protein phosphorylation (GO:0006468);; Cellular Component: plastid (GO:0009536);;	--	[T]	Signal transduction mechanisms	Protein kinase domain;; Protein tyrosine kinase	Casein kinase I isoform delta-like GN=At4g26100 OS=Arabidopsis thaliana (Mouse-ear cress) PE=2 SV=2	T	Signal transduction mechanisms	PREDICTED: uncharacterized protein LOC101760429 [Setaria italica]	biological process: metabolic process (GO:0008152);; biological process: cellular process (GO:0009987);; molecular function: catalytic activity (GO:0003824);; molecular function: binding (GO:0005488);; cellular component: cell (GO:0005623);; cellular component: organelle (GO:0043226);; cellular component: cell part (GO:0044464)	--
BMK_Unigene_013201	CK1_CK1-Pl	PK	15.5944	17.653	18.4865	17.1124	16.4189	19.5445	0.168095	0.621495	normal	0.121094	0.778929	normal	0.751897	0.238921	normal	0.0931774	0.636989	normal	[RTKL]	--	Molecular Function: protein serine/threonine kinase activity (GO:0004674);; Molecular Function: ATP binding (GO:0005524);; Biological Process: protein phosphorylation (GO:0006468);;	--	[T]	Signal transduction mechanisms	Protein kinase domain;; Protein tyrosine kinase	Casein kinase I isoform delta-like GN=At4g26100 OS=Arabidopsis thaliana (Mouse-ear cress) PE=2 SV=2	T	Signal transduction mechanisms	hypothetical protein SORBIDRAFT_09g006270 [Sorghum bicolor]	biological process: metabolic process (GO:0008152);; biological process: cellular process (GO:0009987);; molecular function: catalytic activity (GO:0003824);; molecular function: binding (GO:0005488)	--
BMK_Unigene_052498	CK1_CK1-Pl	PK	20.8603	20.6487	21.1724	18.4567	17.743	33.74	0.60326	0.385606	normal	0.643667	0.432103	normal	0.751897	0.477085	normal	0.104266	0.959813	normal	[RTKL]	--	Molecular Function: protein serine/threonine kinase activity (GO:0004674);; Molecular Function: ATP binding (GO:0005524);; Biological Process: protein phosphorylation (GO:0006468);;	--	[T]	Signal transduction mechanisms	Protein kinase domain;; Protein tyrosine kinase;; ACT domain;; ACT domain;; ACT domain	ACT domain-containing protein ACR4 {ECO:0000305} OS=Arabidopsis thaliana (Mouse-ear cress) PE=2 SV=1	--	--	PREDICTED: casein kinase I-like [Setaria italica]	biological process: metabolic process (GO:0008152);; biological process: cellular process (GO:0009987);; molecular function: catalytic activity (GO:0003824);; molecular function: binding (GO:0005488)	--
BMK_Unigene_089868	CK1_CK1-Pl	PK	17.3488	20.1823	23.6871	23.7397	21.7341	19.2477	0.695613	0.445062	normal	0.104938	1.24718	normal	0.834115	0.215143	normal	0.982384	0.0184293	normal	[RTKL]	--	Molecular Function: protein serine/threonine kinase activity (GO:0004674);; Molecular Function: ATP binding (GO:0005524);; Biological Process: protein phosphorylation (GO:0006468);;	--	[T]	Signal transduction mechanisms	Protein kinase domain;; Protein tyrosine kinase	Casein kinase I isoform delta-like GN=At4g26100 OS=Arabidopsis thaliana (Mouse-ear cress) PE=2 SV=2	--	--	PREDICTED: casein kinase I-like [Setaria italica]	biological process: metabolic process (GO:0008152);; biological process: cellular process (GO:0009987);; molecular function: catalytic activity (GO:0003824);; molecular function: binding (GO:0005488)	--
BMK_Unigene_018386	CMGC_CDK-CCRK	PK	16.8442	17.7893	20.1824	18.7675	20.8826	19.9724	0.389594	0.452649	normal	0.123028	0.761852	normal	0.628262	0.430827	normal	0.37483	0.461147	normal	[RTKL]	--	Biological Process: mitotic cell cycle (GO:0000278);; Molecular Function: cyclin-dependent protein serine/threonine kinase activity (GO:0004693);; Molecular Function: protein tyrosine kinase activity (GO:0004713);; Molecular Function: ATP binding (GO:0005524);; Cellular Component: nucleus (GO:0005634);; Cellular Component: cytosol (GO:0005829);; Molecular Function: RNA polymerase II carboxy-termi…	--	[R]	General function prediction only	Protein kinase domain;; Protein tyrosine kinase	Cyclin-dependent kinase F-1 GN=CDKF-1 OS=Oryza sativa subsp. indica (Rice) PE=3 SV=1	R	General function prediction only	PREDICTED: cyclin-dependent kinase F-1-like [Setaria italica]	biological process: cellular process (GO:0009987);; biological process: single-organism process (GO:0044699);; biological process: metabolic process (GO:0008152);; biological process: biological regulation (GO:0065007);; molecular function: catalytic activity (GO:0003824);; molecular function: binding (GO:0005488);; cellular component: cell (GO:0005623);; cellular component: organelle (GO:0043226…	--
BMK_Unigene_018803	CMGC_CDK-CDK7	PK	19.9987	24.7352	31.8083	36.7892	46.0717	46.9767	0.124098	0.679501	normal	0.0194948	1.19273	normal	0.456273	0.594198	normal	0.0464442	0.716456	normal	[RTKL]	--	Molecular Function: cyclin-dependent protein serine/threonine kinase activity (GO:0004693);; Molecular Function: ATP binding (GO:0005524);; Cellular Component: nucleus (GO:0005634);; Cellular Component: cytoplasm (GO:0005737);; Biological Process: protein phosphorylation (GO:0006468);; Biological Process: cell cycle (GO:0007049);; Molecular Function: RNA polymerase II carboxy-terminal domain kina…	K02202|0|sita:101781985|cyclin-dependent kinase D-1-like; K02202 cyclin-dependent kinase 7 [EC:2.7.11.22 2.7.11.23] (A)	[DKL]	--	Protein kinase domain;; Protein tyrosine kinase	Cyclin-dependent kinase D-1 GN=OJ1764_D01.12 OS=Oryza sativa subsp. japonica (Rice) PE=1 SV=1	D	Cell cycle control, cell division, chromosome partitioning	PREDICTED: cyclin-dependent kinase D-1-like isoform X1 [Setaria italica]	biological process: metabolic process (GO:0008152);; biological process: cellular process (GO:0009987);; biological process: biological regulation (GO:0065007);; molecular function: catalytic activity (GO:0003824);; molecular function: binding (GO:0005488);; cellular component: cell (GO:0005623);; cellular component: organelle (GO:0043226);; cellular component: cell part (GO:0044464);; biological…	Basal transcription factors (ko03022);; Nucleotide excision repair (ko03420)
BMK_Unigene_014678	CMGC_CDK-CDK8	PK	21.4604	16.3133	15.038	24.7157	18.0263	20.6411	0.712908	0.247499	normal	0.992654	0.00875678	normal	0.751897	-0.389077	normal	0.990376	-0.0108579	normal	[RTKL]	--	Biological Process: mitotic cell cycle (GO:0000278);; Molecular Function: cyclin-dependent protein serine/threonine kinase activity (GO:0004693);; Molecular Function: ATP binding (GO:0005524);; Molecular Function: RNA polymerase II carboxy-terminal domain kinase activity (GO:0008353);; Biological Process: stomatal lineage progression (GO:0010440);; Biological Process: DNA endoreduplication (GO:00…	K02208|0|sita:101752981|cyclin-dependent kinase E-1-like; K02208 cyclin-dependent kinase 8/11 [EC:2.7.11.22 2.7.11.23] (A)	[K]	Transcription	Protein kinase domain;; Protein tyrosine kinase	Cyclin-dependent kinase E-1 GN=OSJNBa0056G17.11 OS=Oryza sativa subsp. japonica (Rice) PE=2 SV=2	--	--	PREDICTED: cyclin-dependent kinase E-1-like [Setaria italica]	biological process: cellular process (GO:0009987);; biological process: single-organism process (GO:0044699);; biological process: metabolic process (GO:0008152);; biological process: biological regulation (GO:0065007);; molecular function: catalytic activity (GO:0003824);; molecular function: binding (GO:0005488);; biological process: multicellular organismal process (GO:0032501);; biological pr…	--
BMK_Unigene_046285	CMGC_CDK-CDK8	PK	24.3176	18.6744	18.9007	28.2945	21.7992	24.135	0.60326	0.579056	normal	0.139425	1.1632	normal	0.950256	0.107356	normal	0.889298	0.154031	normal	[RTKL]	--	Biological Process: mitotic cell cycle (GO:0000278);; Molecular Function: cyclin-dependent protein serine/threonine kinase activity (GO:0004693);; Molecular Function: ATP binding (GO:0005524);; Molecular Function: RNA polymerase II carboxy-terminal domain kinase activity (GO:0008353);; Biological Process: stomatal lineage progression (GO:0010440);; Biological Process: DNA endoreduplication (GO:00…	K02208|0|sita:101752981|cyclin-dependent kinase E-1-like; K02208 cyclin-dependent kinase 8/11 [EC:2.7.11.22 2.7.11.23] (A)	[K]	Transcription	Protein kinase domain;; Protein tyrosine kinase	Cyclin-dependent kinase E-1 GN=OSJNBa0056G17.11 OS=Oryza sativa subsp. japonica (Rice) PE=2 SV=2	K	Transcription	PREDICTED: cyclin-dependent kinase E-1-like [Setaria italica]	biological process: cellular process (GO:0009987);; biological process: single-organism process (GO:0044699);; biological process: metabolic process (GO:0008152);; biological process: biological regulation (GO:0065007);; molecular function: catalytic activity (GO:0003824);; molecular function: binding (GO:0005488);; biological process: multicellular organismal process (GO:0032501);; biological pr…	--
BMK_Unigene_062491	CMGC_CDK-CDK8	PK	0.290982	0	0	0	0	0	0.60326	-1.43425	normal	0.650012	-1.31958	normal	--	--	--	--	--	--	[RTKL]	--	Molecular Function: cyclin-dependent protein serine/threonine kinase activity (GO:0004693);; Molecular Function: ATP binding (GO:0005524);; Cellular Component: nucleus (GO:0005634);; Biological Process: regulation of transcription, DNA-templated (GO:0006355);; Biological Process: protein phosphorylation (GO:0006468);; Molecular Function: RNA polymerase II carboxy-terminal domain kinase activity (…	K02208|8.48486e-25|ccp:CHC_T00008742001|Cyclin-dependent kinase E-1, CDKE-1; K02208 cyclin-dependent kinase 8/11 [EC:2.7.11.22 2.7.11.23] (A)	[K]	Transcription	Protein kinase domain;; Protein tyrosine kinase	Cyclin-dependent kinase E-1 GN=MBK5.8 OS=Arabidopsis thaliana (Mouse-ear cress) PE=1 SV=2	K	Transcription	RecName: Full=Serine/threonine-protein kinase SSN3; AltName: Full=Cyclin-dependent kinase 8 [Phaeosphaeria nodorum SN15]	biological process: metabolic process (GO:0008152);; biological process: cellular process (GO:0009987);; biological process: biological regulation (GO:0065007);; molecular function: catalytic activity (GO:0003824);; molecular function: binding (GO:0005488);; cellular component: cell (GO:0005623);; cellular component: organelle (GO:0043226);; cellular component: cell part (GO:0044464)	--
BMK_Unigene_000001	CMGC_CDK-CRK7-CDK9	PK	13.7579	47.5766	16.4311	23.6088	42.0302	12.5227	0.00653672	1.39304	up	0.747872	0.312071	normal	0.427611	0.742874	normal	0.195087	-0.966772	normal	[RTKL]	--	Molecular Function: protein serine/threonine kinase activity (GO:0004674);; Molecular Function: protein tyrosine kinase activity (GO:0004713);; Molecular Function: ATP binding (GO:0005524);; Cellular Component: plasma membrane (GO:0005886);; Biological Process: protein phosphorylation (GO:0006468);;	K08819|0|sita:101784750|probable serine/threonine-protein kinase At1g54610-like; K08819 cyclin-dependent kinase 12/13 [EC:2.7.11.22 2.7.11.23] (A)	[D]	Cell cycle control, cell division, chromosome partitioning	Protein kinase domain;; Protein tyrosine kinase	Probable serine/threonine-protein kinase At1g54610 GN=At1g54610 OS=Arabidopsis thaliana (Mouse-ear cress) PE=1 SV=1	T	Signal transduction mechanisms	PREDICTED: probable serine/threonine-protein kinase At1g54610-like isoform X2 [Setaria italica]	biological process: metabolic process (GO:0008152);; biological process: cellular process (GO:0009987);; molecular function: catalytic activity (GO:0003824);; biological process: single-organism process (GO:0044699);; molecular function: binding (GO:0005488);; cellular component: cell (GO:0005623);; cellular component: membrane (GO:0016020);; cellular component: cell part (GO:0044464)	--
BMK_Unigene_000957	CMGC_CDK-CRK7-CDK9	PK	47.0927	58.236	50.5715	67.7965	75.3209	72.9239	0.687408	0.31002	normal	0.65547	0.376021	normal	0.774077	-0.257706	normal	0.96725	-0.046118	normal	[RTKL]	--	Molecular Function: protein serine/threonine kinase activity (GO:0004674);; Molecular Function: protein tyrosine kinase activity (GO:0004713);; Molecular Function: ATP binding (GO:0005524);; Biological Process: protein phosphorylation (GO:0006468);; Molecular Function: amino acid binding (GO:0016597);;	--	[D]	Cell cycle control, cell division, chromosome partitioning	Protein kinase domain;; Protein tyrosine kinase;; Protein tyrosine kinase;; Protein kinase domain	Cyclin-dependent kinase C-2 GN=OJ1294_F06.25 OS=Oryza sativa subsp. japonica (Rice) PE=2 SV=1	T	Signal transduction mechanisms	PREDICTED: probable serine/threonine-protein kinase DDB_G0267514-like [Setaria italica]	biological process: metabolic process (GO:0008152);; biological process: cellular process (GO:0009987);; molecular function: catalytic activity (GO:0003824);; biological process: single-organism process (GO:0044699);; molecular function: binding (GO:0005488)	--
BMK_Unigene_003186	CMGC_CDK-CRK7-CDK9	PK	11.5335	2.98974	3.9294	12.5775	4.6713	4.33851	0.00022045	-1.55867	down	0.0452223	-1.02215	normal	0.0510604	-1.12275	normal	0.000995712	-1.13793	down	[RTKL]	--	Molecular Function: protein serine/threonine kinase activity (GO:0004674);; Molecular Function: ATP binding (GO:0005524);; Cellular Component: plasma membrane (GO:0005886);; Biological Process: protein phosphorylation (GO:0006468);;	--	[D]	Cell cycle control, cell division, chromosome partitioning	Protein kinase domain;; Protein tyrosine kinase	Probable serine/threonine-protein kinase At1g09600 GN=At1g09600 OS=Arabidopsis thaliana (Mouse-ear cress) PE=3 SV=1	T	Signal transduction mechanisms	hypothetical protein SORBIDRAFT_03g002610 [Sorghum bicolor]	biological process: metabolic process (GO:0008152);; biological process: cellular process (GO:0009987);; molecular function: catalytic activity (GO:0003824);; molecular function: binding (GO:0005488);; cellular component: cell (GO:0005623);; cellular component: membrane (GO:0016020);; cellular component: cell part (GO:0044464)	--
BMK_Unigene_004052	CMGC_CDK-CRK7-CDK9	PK	2.21422	1.15337	1.51545	3.44025	1.74282	1.78594	0.650006	-0.666765	normal	0.996352	0.00892437	normal	0.797854	-0.599664	normal	0.699326	-0.517309	normal	[RTKL]	--	Molecular Function: cyclin-dependent protein serine/threonine kinase activity (GO:0004693);; Molecular Function: ATP binding (GO:0005524);; Cellular Component: cytosol (GO:0005829);; Biological Process: mRNA processing (GO:0006397);; Biological Process: protein phosphorylation (GO:0006468);; Molecular Function: RNA polymerase II carboxy-terminal domain kinase activity (GO:0008353);; Biological Pr…	K08819|1.58878e-54|sbi:SORBI_01g009600|SORBIDRAFT_01g009600, Sb01g009600; hypothetical protein; K08819 cyclin-dependent kinase 12/13 [EC:2.7.11.22 2.7.11.23] (A)	[D]	Cell cycle control, cell division, chromosome partitioning	Protein kinase domain	Cyclin-dependent kinase C-2 GN=OJ1294_F06.25 OS=Oryza sativa subsp. japonica (Rice) PE=2 SV=1	D	Cell cycle control, cell division, chromosome partitioning	PREDICTED: ribosomal RNA-processing protein 12-like [Brachypodium distachyon]	biological process: metabolic process (GO:0008152);; biological process: cellular process (GO:0009987);; biological process: biological regulation (GO:0065007);; molecular function: catalytic activity (GO:0003824);; molecular function: binding (GO:0005488);; cellular component: cell (GO:0005623);; cellular component: cell part (GO:0044464);; biological process: response to stimulus (GO:0050896);;…	--
BMK_Unigene_007411	CMGC_CDK-CRK7-CDK9	PK	17.2365	15.0665	15.8047	15.9416	16.6601	9.32978	0.999187	-0.000549294	normal	0.650012	0.365676	normal	0.929096	0.105546	normal	0.18282	-0.744224	normal	[RTKL]	--	Molecular Function: protein serine/threonine kinase activity (GO:0004674);; Molecular Function: ATP binding (GO:0005524);; Biological Process: protein phosphorylation (GO:0006468);;	--	[D]	Cell cycle control, cell division, chromosome partitioning	Protein kinase domain;; Protein tyrosine kinase	Probable serine/threonine-protein kinase At1g09600 GN=At1g09600 OS=Arabidopsis thaliana (Mouse-ear cress) PE=3 SV=1	T	Signal transduction mechanisms	PREDICTED: probable serine/threonine-protein kinase At1g09600-like [Setaria italica]	biological process: metabolic process (GO:0008152);; biological process: cellular process (GO:0009987);; molecular function: catalytic activity (GO:0003824);; molecular function: binding (GO:0005488)	--
BMK_Unigene_008440	CMGC_CDK-CRK7-CDK9	PK	6.94137	6.07359	4.4594	4.80905	5.08102	5.35132	0.812694	0.173292	normal	0.903961	-0.12372	normal	0.837512	0.308891	normal	0.583367	0.517818	normal	[RTKL]	--	Molecular Function: ATP binding (GO:0005524);; Cellular Component: cytosol (GO:0005829);; Biological Process: mRNA processing (GO:0006397);; Biological Process: protein phosphorylation (GO:0006468);; Molecular Function: RNA polymerase II carboxy-terminal domain kinase activity (GO:0008353);; Biological Process: response to virus (GO:0009615);; Cellular Component: nuclear body (GO:0016604);; Biolo…	K08819|3.62774e-125|sita:101753774|cyclin-dependent kinase C-2-like; K08819 cyclin-dependent kinase 12/13 [EC:2.7.11.22 2.7.11.23] (A)	[D]	Cell cycle control, cell division, chromosome partitioning	Protein kinase domain;; Protein tyrosine kinase	Cyclin-dependent kinase C-2 GN=OJ1294_F06.25 OS=Oryza sativa subsp. japonica (Rice) PE=2 SV=1	D	Cell cycle control, cell division, chromosome partitioning	PREDICTED: cyclin-dependent kinase C-2-like [Setaria italica]	molecular function: binding (GO:0005488);; cellular component: cell (GO:0005623);; cellular component: cell part (GO:0044464);; biological process: metabolic process (GO:0008152);; biological process: cellular process (GO:0009987);; molecular function: catalytic activity (GO:0003824);; biological process: response to stimulus (GO:0050896);; biological process: multi-organism process (GO:0051704);…	--
BMK_Unigene_014109	CMGC_CDK-CRK7-CDK9	PK	1.41406	0.679123	0.483445	1.57738	1.00279	1.61465	0.549673	-0.664144	normal	0.457364	-0.956238	normal	0.798247	-0.345309	normal	0.699326	0.39653	normal	[RTKL]	--	Molecular Function: protein serine/threonine kinase activity (GO:0004674);; Molecular Function: ATP binding (GO:0005524);; Cellular Component: plasma membrane (GO:0005886);; Biological Process: protein phosphorylation (GO:0006468);; Cellular Component: plastid (GO:0009536);;	--	[D]	Cell cycle control, cell division, chromosome partitioning	Protein kinase domain;; Protein tyrosine kinase	Probable serine/threonine-protein kinase At1g09600 GN=At1g09600 OS=Arabidopsis thaliana (Mouse-ear cress) PE=3 SV=1	T	Signal transduction mechanisms	PREDICTED: probable serine/threonine-protein kinase At1g09600-like [Setaria italica]	biological process: metabolic process (GO:0008152);; biological process: cellular process (GO:0009987);; molecular function: catalytic activity (GO:0003824);; molecular function: binding (GO:0005488);; cellular component: cell (GO:0005623);; cellular component: membrane (GO:0016020);; cellular component: cell part (GO:0044464);; cellular component: organelle (GO:0043226)	--
BMK_Unigene_016120	CMGC_CDK-CRK7-CDK9	PK	42.7985	25.9637	25.8834	52.8497	32.7242	37.9453	0.592046	-0.338628	normal	0.746385	-0.211329	normal	0.751897	-0.407406	normal	0.88282	-0.0956678	normal	[RTKL]	--	Molecular Function: protein serine/threonine kinase activity (GO:0004674);; Molecular Function: ATP binding (GO:0005524);; Biological Process: protein phosphorylation (GO:0006468);; Cellular Component: plastid (GO:0009536);;	K08819|0|sita:101758546|probable serine/threonine-protein kinase At1g54610-like; K08819 cyclin-dependent kinase 12/13 [EC:2.7.11.22 2.7.11.23] (A)	[D]	Cell cycle control, cell division, chromosome partitioning	Protein kinase domain;; Protein tyrosine kinase	Probable serine/threonine-protein kinase At1g54610 GN=At1g54610 OS=Arabidopsis thaliana (Mouse-ear cress) PE=1 SV=1	T	Signal transduction mechanisms	PREDICTED: probable serine/threonine-protein kinase At1g54610-like isoform X1 [Setaria italica]	biological process: metabolic process (GO:0008152);; biological process: cellular process (GO:0009987);; molecular function: catalytic activity (GO:0003824);; molecular function: binding (GO:0005488);; cellular component: cell (GO:0005623);; cellular component: organelle (GO:0043226);; cellular component: cell part (GO:0044464)	--
BMK_Unigene_019667	CMGC_CDK-CRK7-CDK9	PK	14.9512	13.8858	12.1555	13.7867	15.3917	10.7635	0.60326	0.267618	normal	0.727975	0.207555	normal	0.64834	0.431394	normal	0.978771	0.0175464	normal	[RTKL]	--	Molecular Function: protein serine/threonine kinase activity (GO:0004674);; Molecular Function: ATP binding (GO:0005524);; Cellular Component: plasma membrane (GO:0005886);; Biological Process: protein phosphorylation (GO:0006468);;	K08819|0|sita:101771180|probable serine/threonine-protein kinase At1g54610-like; K08819 cyclin-dependent kinase 12/13 [EC:2.7.11.22 2.7.11.23] (A)	[D]	Cell cycle control, cell division, chromosome partitioning	Protein kinase domain;; Protein tyrosine kinase	Probable serine/threonine-protein kinase At1g54610 GN=At1g54610 OS=Arabidopsis thaliana (Mouse-ear cress) PE=1 SV=1	T	Signal transduction mechanisms	PREDICTED: probable serine/threonine-protein kinase At1g54610-like [Setaria italica]	biological process: metabolic process (GO:0008152);; biological process: cellular process (GO:0009987);; molecular function: catalytic activity (GO:0003824);; molecular function: binding (GO:0005488);; cellular component: cell (GO:0005623);; cellular component: membrane (GO:0016020);; cellular component: cell part (GO:0044464)	--
BMK_Unigene_020448	CMGC_CDK-CRK7-CDK9	PK	2.6387	0.211474	0.323559	1.41074	0.416592	0.464583	0.0828725	-2.78217	normal	0.203877	-2.35973	normal	0.751897	-1.12119	normal	0.644513	-1.03924	normal	[RTKL]	--	Molecular Function: protein serine/threonine kinase activity (GO:0004674);; Molecular Function: ATP binding (GO:0005524);; Cellular Component: mitochondrion (GO:0005739);; Cellular Component: plasma membrane (GO:0005886);; Biological Process: protein phosphorylation (GO:0006468);;	K08819|1.13647e-113|sita:101762842|probable serine/threonine-protein kinase At1g54610-like; K08819 cyclin-dependent kinase 12/13 [EC:2.7.11.22 2.7.11.23] (A)	[D]	Cell cycle control, cell division, chromosome partitioning	Protein kinase domain;; Protein tyrosine kinase	Probable serine/threonine-protein kinase At1g54610 GN=At1g54610 OS=Arabidopsis thaliana (Mouse-ear cress) PE=1 SV=1	T	Signal transduction mechanisms	PREDICTED: probable serine/threonine-protein kinase At1g54610-like [Setaria italica]	biological process: metabolic process (GO:0008152);; biological process: cellular process (GO:0009987);; molecular function: catalytic activity (GO:0003824);; molecular function: binding (GO:0005488);; cellular component: cell (GO:0005623);; cellular component: organelle (GO:0043226);; cellular component: cell part (GO:0044464);; cellular component: membrane (GO:0016020)	--
BMK_Unigene_039645	CMGC_CDK-CRK7-CDK9	PK	14.484	8.72608	11.4809	12.1707	9.75671	11.9455	0.801259	-0.414222	normal	0.616486	0.90837	normal	0.92192	0.266719	normal	0.888235	0.288519	normal	[RTKL]	--	Molecular Function: cyclin-dependent protein serine/threonine kinase activity (GO:0004693);; Molecular Function: ATP binding (GO:0005524);; Biological Process: protein phosphorylation (GO:0006468);; Molecular Function: RNA polymerase II carboxy-terminal domain kinase activity (GO:0008353);; Biological Process: cell division (GO:0051301);;	K08819|0|sita:101772877|cyclin-dependent kinase C-3-like; K08819 cyclin-dependent kinase 12/13 [EC:2.7.11.22 2.7.11.23] (A)	[D]	Cell cycle control, cell division, chromosome partitioning	Protein kinase domain;; Protein tyrosine kinase	Cyclin-dependent kinase C-3 OS=Oryza sativa subsp. japonica (Rice) PE=3 SV=2	D	Cell cycle control, cell division, chromosome partitioning	PREDICTED: cyclin-dependent kinase C-3-like isoform X2 [Setaria italica]	biological process: metabolic process (GO:0008152);; biological process: cellular process (GO:0009987);; biological process: biological regulation (GO:0065007);; molecular function: catalytic activity (GO:0003824);; molecular function: binding (GO:0005488);; biological process: single-organism process (GO:0044699)	--
BMK_Unigene_041330	CMGC_CDK-CRK7-CDK9	PK	9.41884	23.3698	11.0814	14.6532	29.8186	4.63355	9.3665e-05	1.75947	up	0.509352	0.838645	normal	0.0234918	1.24715	normal	0.0532203	-1.16537	normal	[RTKL]	--	Molecular Function: protein serine/threonine kinase activity (GO:0004674);; Molecular Function: ATP binding (GO:0005524);; Cellular Component: plasma membrane (GO:0005886);; Biological Process: protein phosphorylation (GO:0006468);; Cellular Component: plastid (GO:0009536);;	--	[D]	Cell cycle control, cell division, chromosome partitioning	Protein kinase domain;; Protein tyrosine kinase	Probable serine/threonine-protein kinase At1g54610 GN=At1g54610 OS=Arabidopsis thaliana (Mouse-ear cress) PE=1 SV=1	T	Signal transduction mechanisms	PREDICTED: probable serine/threonine-protein kinase At1g09600-like isoform X2 [Setaria italica]	biological process: metabolic process (GO:0008152);; biological process: cellular process (GO:0009987);; molecular function: catalytic activity (GO:0003824);; molecular function: binding (GO:0005488);; cellular component: cell (GO:0005623);; cellular component: membrane (GO:0016020);; cellular component: cell part (GO:0044464);; cellular component: organelle (GO:0043226)	--
BMK_Unigene_050716	CMGC_CDK-CRK7-CDK9	PK	47.5412	39.1722	39.2368	65.4284	43.3001	51.3554	0.728779	-0.18902	normal	0.895998	0.0975786	normal	0.957355	-0.0779077	normal	0.851283	0.134249	normal	[RTKL]	--	Molecular Function: cyclin-dependent protein serine/threonine kinase activity (GO:0004693);; Molecular Function: ATP binding (GO:0005524);; Cellular Component: cytosol (GO:0005829);; Biological Process: mRNA processing (GO:0006397);; Biological Process: protein phosphorylation (GO:0006468);; Molecular Function: RNA polymerase II carboxy-terminal domain kinase activity (GO:0008353);; Biological Pr…	K08819|0|sita:101761648|cyclin-dependent kinase C-2-like; K08819 cyclin-dependent kinase 12/13 [EC:2.7.11.22 2.7.11.23] (A)	[D]	Cell cycle control, cell division, chromosome partitioning	Protein kinase domain;; Protein tyrosine kinase;; SRP54-type protein, GTPase domain;; SRP54-type protein, helical bundle domain;; CobQ/CobB/MinD/ParA nucleotide binding domain	Cyclin-dependent kinase C-2 GN=OJ1294_F06.25 OS=Oryza sativa subsp. japonica (Rice) PE=2 SV=1	--	--	PREDICTED: cyclin-dependent kinase C-2-like [Setaria italica]	biological process: metabolic process (GO:0008152);; biological process: cellular process (GO:0009987);; biological process: biological regulation (GO:0065007);; molecular function: catalytic activity (GO:0003824);; molecular function: binding (GO:0005488);; cellular component: cell (GO:0005623);; cellular component: cell part (GO:0044464);; biological process: response to stimulus (GO:0050896);;…	--
BMK_Unigene_079684	CMGC_CDK-CRK7-CDK9	PK	0.420166	1.17413	0.345297	1.34386	0.272442	0.850842	--	--	--	--	--	--	--	--	--	--	--	--	[RTKL]	--	Molecular Function: transferase activity, transferring phosphorus-containing groups (GO:0016772);;	K08819|2.25948e-69|ccp:CHC_T00008618001|Cyclin-dependent kinase C-1, CDKC-1; K08819 cyclin-dependent kinase 12/13 [EC:2.7.11.22 2.7.11.23] (A)	[R]	General function prediction only	Protein kinase domain;; Protein tyrosine kinase	Cyclin-dependent kinase C-2 GN=OJ1294_F06.25 OS=Oryza sativa subsp. japonica (Rice) PE=2 SV=1	T	Signal transduction mechanisms	cmgc cdk pitslre protein kinase [Moniliophthora roreri MCA 2997]	biological process: metabolic process (GO:0008152);; molecular function: catalytic activity (GO:0003824)	--
BMK_Unigene_084375	CMGC_CDK-CRK7-CDK9	PK	15.3	8.93694	11.581	12.9302	10.392	12.8864	0.651773	0.961024	normal	0.216788	2.25591	normal	0.907629	0.272264	normal	0.961782	0.107212	normal	[RTKL]	--	Molecular Function: cyclin-dependent protein serine/threonine kinase activity (GO:0004693);; Molecular Function: ATP binding (GO:0005524);; Biological Process: protein phosphorylation (GO:0006468);; Molecular Function: RNA polymerase II carboxy-terminal domain kinase activity (GO:0008353);; Biological Process: cell division (GO:0051301);;	K08819|1.31032e-146|sita:101772877|cyclin-dependent kinase C-3-like; K08819 cyclin-dependent kinase 12/13 [EC:2.7.11.22 2.7.11.23] (A)	[D]	Cell cycle control, cell division, chromosome partitioning	Protein kinase domain;; Protein tyrosine kinase;; Protein kinase domain;; Protein tyrosine kinase	Cyclin-dependent kinase C-3 OS=Oryza sativa subsp. japonica (Rice) PE=3 SV=2	D	Cell cycle control, cell division, chromosome partitioning	PREDICTED: cyclin-dependent kinase C-3-like isoform X2 [Setaria italica]	biological process: metabolic process (GO:0008152);; biological process: cellular process (GO:0009987);; biological process: biological regulation (GO:0065007);; molecular function: catalytic activity (GO:0003824);; molecular function: binding (GO:0005488);; biological process: single-organism process (GO:0044699)	--
BMK_Unigene_088391	CMGC_CDK-CRK7-CDK9	PK	15.0505	54.4338	18.7693	26.9256	48.3859	14.6287	1.20277e-05	2.26567	up	0.279227	1.22097	normal	0.270133	0.961351	normal	0.699326	-0.372981	normal	[RTKL]	--	Molecular Function: protein serine/threonine kinase activity (GO:0004674);; Molecular Function: protein tyrosine kinase activity (GO:0004713);; Molecular Function: ATP binding (GO:0005524);; Cellular Component: plasma membrane (GO:0005886);; Biological Process: protein phosphorylation (GO:0006468);;	K08819|0|sita:101784750|probable serine/threonine-protein kinase At1g54610-like; K08819 cyclin-dependent kinase 12/13 [EC:2.7.11.22 2.7.11.23] (A)	[D]	Cell cycle control, cell division, chromosome partitioning	Protein kinase domain;; Protein tyrosine kinase	Probable serine/threonine-protein kinase At1g54610 GN=At1g54610 OS=Arabidopsis thaliana (Mouse-ear cress) PE=1 SV=1	T	Signal transduction mechanisms	PREDICTED: probable serine/threonine-protein kinase At1g54610-like isoform X2 [Setaria italica]	biological process: metabolic process (GO:0008152);; biological process: cellular process (GO:0009987);; molecular function: catalytic activity (GO:0003824);; biological process: single-organism process (GO:0044699);; molecular function: binding (GO:0005488);; cellular component: cell (GO:0005623);; cellular component: membrane (GO:0016020);; cellular component: cell part (GO:0044464)	--
BMK_Unigene_089379	CMGC_CDK-CRK7-CDK9	PK	0	0	0	0	0	0	--	--	--	--	--	--	--	--	--	--	--	--	--	--	--	--	--	--	Protein kinase domain;; Protein tyrosine kinase	--	--	--	--	--	--
BMK_Unigene_091868	CMGC_CDK-CRK7-CDK9	PK	13.7363	16.1607	13.2504	13.2024	20.5729	7.54895	0.0912506	1.03275	normal	0.650012	0.682054	normal	0.0557056	1.39983	normal	0.397916	-0.940048	normal	[RTKL]	--	Molecular Function: protein serine/threonine kinase activity (GO:0004674);; Molecular Function: ATP binding (GO:0005524);; Biological Process: protein phosphorylation (GO:0006468);;	--	[D]	Cell cycle control, cell division, chromosome partitioning	Protein kinase domain;; Protein tyrosine kinase	Probable serine/threonine-protein kinase At1g09600 GN=At1g09600 OS=Arabidopsis thaliana (Mouse-ear cress) PE=3 SV=1	T	Signal transduction mechanisms	PREDICTED: probable serine/threonine-protein kinase At1g09600-like [Setaria italica]	biological process: metabolic process (GO:0008152);; biological process: cellular process (GO:0009987);; molecular function: catalytic activity (GO:0003824);; molecular function: binding (GO:0005488)	--
BMK_Unigene_106604	CMGC_CDK-CRK7-CDK9	PK	0	0.173388	0.0795972	0.168305	0.16349	0.0794823	0.60326	1.45718	normal	--	--	--	0.989392	0.0425701	normal	0.953963	-0.194783	normal	[RTKL]	--	Molecular Function: nucleotide binding (GO:0000166);; Molecular Function: protein kinase activity (GO:0004672);;	--	[D]	Cell cycle control, cell division, chromosome partitioning	Protein kinase domain;; Protein tyrosine kinase	Cyclin-dependent kinase C-2 GN=OJ1294_F06.25 OS=Oryza sativa subsp. japonica (Rice) PE=2 SV=1	T	Signal transduction mechanisms	ATP binding protein, putative isoform 2 [Theobroma cacao]	molecular function: binding (GO:0005488);; biological process: metabolic process (GO:0008152);; biological process: cellular process (GO:0009987);; molecular function: catalytic activity (GO:0003824)	--
BMK_Unigene_036675	CMGC_CDKL-Cr	PK	0.27991	0	0	0.178104	0	0	0.60326	-1.43069	normal	0.650012	-1.31475	normal	0.751897	-0.741552	normal	0.699326	-0.799459	normal	[RTKL]	--	Molecular Function: protein serine/threonine kinase activity (GO:0004674);; Biological Process: single-organism cellular process (GO:0044763);;	K08818|2.34518e-15|ota:Ot01g02660|CD2L1; serine/threonine-protein kinase cdc2l1 (IC); K08818 cell division cycle 2-like [EC:2.7.11.22] (A)	[T]	Signal transduction mechanisms	Protein kinase domain	Cyclin-dependent kinase G1 GN=CDKG1 OS=Arabidopsis thaliana (Mouse-ear cress) PE=1 SV=1	T	Signal transduction mechanisms	extracellular signal-regulated kinase 1 [Brettanomyces bruxellensis AWRI1499]	biological process: metabolic process (GO:0008152);; biological process: cellular process (GO:0009987);; molecular function: catalytic activity (GO:0003824);; biological process: single-organism process (GO:0044699)	--
BMK_Unigene_102380	CMGC_CDKL-Cr	PK	0	0	0	0	0	0.187065	--	--	--	--	--	--	--	--	--	0.699326	0.884835	normal	[RTKL]	--	Molecular Function: transferase activity, transferring phosphorus-containing groups (GO:0016772);; Cellular Component: intracellular part (GO:0044424);; Biological Process: single-organism cellular process (GO:0044763);;	K04688|1.56815e-13|sot:102595020|serine/threonine-protein kinase AtPK2/AtPK19-like; K04688 p70 ribosomal S6 kinase [EC:2.7.11.1] (A)	[T]	Signal transduction mechanisms	Protein kinase domain;; Protein tyrosine kinase	3-phosphoinositide-dependent protein kinase 1 GN=T32M21.110 OS=Arabidopsis thaliana (Mouse-ear cress) PE=1 SV=1	T	Signal transduction mechanisms	hypothetical protein [Tuber melanosporum Mel28]	biological process: metabolic process (GO:0008152);; molecular function: catalytic activity (GO:0003824);; cellular component: cell (GO:0005623);; cellular component: cell part (GO:0044464);; biological process: cellular process (GO:0009987);; biological process: single-organism process (GO:0044699)	--
BMK_Unigene_011215	CMGC_CDKL-Os	PK	0.291144	0.731927	0.181788	1.10631	1.8266	0.646708	0.450698	1.48448	normal	0.957017	-0.193315	normal	0.689403	0.908166	normal	0.818157	-0.376378	normal	[RTKL]	--	Molecular Function: protein serine/threonine kinase activity (GO:0004674);; Molecular Function: protein tyrosine kinase activity (GO:0004713);; Molecular Function: ATP binding (GO:0005524);; Biological Process: protein phosphorylation (GO:0006468);;	K08818|4.94327e-53|sita:101765555|putative cyclin-dependent kinase F-2-like; K08818 cell division cycle 2-like [EC:2.7.11.22] (A)	[R]	General function prediction only	Protein kinase domain;; Protein tyrosine kinase	Putative cyclin-dependent kinase F-2 GN=CDKF-2 OS=Oryza sativa subsp. japonica (Rice) PE=3 SV=1	T	Signal transduction mechanisms	PREDICTED: putative cyclin-dependent kinase F-2-like [Setaria italica]	biological process: metabolic process (GO:0008152);; biological process: cellular process (GO:0009987);; molecular function: catalytic activity (GO:0003824);; biological process: single-organism process (GO:0044699);; molecular function: binding (GO:0005488)	--
BMK_Unigene_014859	CMGC_CDKL-Os	PK	0.0973285	5.72269	4.43949	0.151526	5.22409	5.07915	7.95331e-10	5.79198	up	3.46481e-06	5.32509	up	2.34093e-06	4.60685	up	1.03371e-08	4.83449	up	[RTKL]	--	Molecular Function: protein serine/threonine kinase activity (GO:0004674);; Molecular Function: protein tyrosine kinase activity (GO:0004713);; Molecular Function: ATP binding (GO:0005524);; Cellular Component: mitochondrion (GO:0005739);; Biological Process: protein phosphorylation (GO:0006468);;	K08818|7.63684e-104|sita:101756009|putative cyclin-dependent kinase F-2-like; K08818 cell division cycle 2-like [EC:2.7.11.22] (A)	[D]	Cell cycle control, cell division, chromosome partitioning	Protein kinase domain;; Protein tyrosine kinase;; Phosphotransferase enzyme family;; Lipopolysaccharide kinase (Kdo/WaaP) family	Putative cyclin-dependent kinase F-2 GN=CDKF-2 OS=Oryza sativa subsp. japonica (Rice) PE=3 SV=1	T	Signal transduction mechanisms	PREDICTED: putative cyclin-dependent kinase F-2-like [Setaria italica]	biological process: metabolic process (GO:0008152);; biological process: cellular process (GO:0009987);; molecular function: catalytic activity (GO:0003824);; biological process: single-organism process (GO:0044699);; molecular function: binding (GO:0005488);; cellular component: cell (GO:0005623);; cellular component: organelle (GO:0043226);; cellular component: cell part (GO:0044464)	--
BMK_Unigene_015525	CMGC_CDKL-Os	PK	0.604993	1.55027	0.998554	0.719053	0.285089	0.113268	0.100871	1.64925	normal	0.457693	1.20266	normal	0.751897	-0.885667	normal	0.243972	-1.88552	normal	[RTKL]	--	Molecular Function: protein serine/threonine kinase activity (GO:0004674);; Molecular Function: protein tyrosine kinase activity (GO:0004713);; Molecular Function: ATP binding (GO:0005524);; Cellular Component: mitochondrion (GO:0005739);; Biological Process: protein phosphorylation (GO:0006468);; Cellular Component: plastid (GO:0009536);;	K08818|0|sita:101756808|putative cyclin-dependent kinase F-2-like; K08818 cell division cycle 2-like [EC:2.7.11.22] (A)	[R]	General function prediction only	Protein kinase domain;; Protein tyrosine kinase;; Phosphotransferase enzyme family	Putative cyclin-dependent kinase F-2 GN=CDKF-2 OS=Oryza sativa subsp. japonica (Rice) PE=3 SV=1	T	Signal transduction mechanisms	PREDICTED: putative cyclin-dependent kinase F-2-like [Setaria italica]	biological process: metabolic process (GO:0008152);; biological process: cellular process (GO:0009987);; molecular function: catalytic activity (GO:0003824);; biological process: single-organism process (GO:0044699);; molecular function: binding (GO:0005488);; cellular component: cell (GO:0005623);; cellular component: organelle (GO:0043226);; cellular component: cell part (GO:0044464)	--
BMK_Unigene_028003	CMGC_CDKL-Os	PK	0.0630383	0.0621542	0.232898	0.0569849	0	0.408565	0.970884	0.121298	normal	0.682439	1.17098	normal	--	--	--	0.529101	1.68535	normal	[RTKL]	--	Molecular Function: protein serine/threonine kinase activity (GO:0004674);; Molecular Function: protein tyrosine kinase activity (GO:0004713);; Molecular Function: ATP binding (GO:0005524);; Cellular Component: mitochondrion (GO:0005739);; Biological Process: protein phosphorylation (GO:0006468);;	K08818|5.97622e-74|sita:101763856|putative cyclin-dependent kinase F-2-like; K08818 cell division cycle 2-like [EC:2.7.11.22] (A)	[T]	Signal transduction mechanisms	Protein kinase domain	Putative cyclin-dependent kinase F-2 GN=CDKF-2 OS=Oryza sativa subsp. japonica (Rice) PE=3 SV=1	T	Signal transduction mechanisms	PREDICTED: putative cyclin-dependent kinase F-2-like [Setaria italica]	biological process: metabolic process (GO:0008152);; biological process: cellular process (GO:0009987);; molecular function: catalytic activity (GO:0003824);; biological process: single-organism process (GO:0044699);; molecular function: binding (GO:0005488);; cellular component: cell (GO:0005623);; cellular component: organelle (GO:0043226);; cellular component: cell part (GO:0044464)	--
BMK_Unigene_045235	CMGC_CDKL-Os	PK	1.34692	4.0071	3.61456	0.946157	4.61412	3.16654	0.227302	1.6646	normal	0.46128	1.23056	normal	0.0611698	1.95904	normal	0.192055	1.44185	normal	--	--	Molecular Function: nucleotide binding (GO:0000166);; Molecular Function: protein kinase activity (GO:0004672);; Biological Process: phosphorylation (GO:0016310);;	K08818|2.50045e-34|sita:101756009|putative cyclin-dependent kinase F-2-like; K08818 cell division cycle 2-like [EC:2.7.11.22] (A)	[R]	General function prediction only	Protein kinase domain;; Protein tyrosine kinase	Putative cyclin-dependent kinase F-2 GN=CDKF-2 OS=Oryza sativa subsp. japonica (Rice) PE=3 SV=1	T	Signal transduction mechanisms	PREDICTED: putative cyclin-dependent kinase F-2-like [Setaria italica]	molecular function: binding (GO:0005488);; biological process: metabolic process (GO:0008152);; biological process: cellular process (GO:0009987);; molecular function: catalytic activity (GO:0003824)	--
BMK_Unigene_087429	CMGC_CDKL-Os	PK	0.226135	0	0	0.28397	0.144339	0.14698	0.60326	-1.43425	normal	0.650012	-1.31958	normal	0.960632	-0.234011	normal	0.953224	-0.226782	normal	[RTKL]	--	Molecular Function: nucleotide binding (GO:0000166);; Molecular Function: protein kinase activity (GO:0004672);;	K08818|1.55217e-52|sita:101765151|putative cyclin-dependent kinase F-2-like; K08818 cell division cycle 2-like [EC:2.7.11.22] (A)	[T]	Signal transduction mechanisms	Protein kinase domain;; Protein tyrosine kinase	Serine/threonine-protein kinase TIO GN=F14I3.15 OS=Arabidopsis thaliana (Mouse-ear cress) PE=1 SV=1	T	Signal transduction mechanisms	PREDICTED: putative cyclin-dependent kinase F-2-like [Setaria italica]	molecular function: binding (GO:0005488);; biological process: metabolic process (GO:0008152);; biological process: cellular process (GO:0009987);; molecular function: catalytic activity (GO:0003824)	--
BMK_Unigene_087434	CMGC_CDKL-Os	PK	0.0691336	0	0	0.0624949	0.257173	0	--	--	--	--	--	--	0.764589	0.813841	normal	--	--	--	[RTKL]	--	Molecular Function: nucleotide binding (GO:0000166);; Molecular Function: protein kinase activity (GO:0004672);;	--	[R]	General function prediction only	Protein kinase domain	Putative cyclin-dependent kinase F-2 GN=CDKF-2 OS=Oryza sativa subsp. japonica (Rice) PE=3 SV=1	T	Signal transduction mechanisms	PREDICTED: putative cyclin-dependent kinase F-2-like, partial [Setaria italica]	molecular function: binding (GO:0005488);; biological process: metabolic process (GO:0008152);; biological process: cellular process (GO:0009987);; molecular function: catalytic activity (GO:0003824)	--
BMK_Unigene_048304	CMGC_CDK-PITSLRE	PK	6.30944	3.84052	3.41914	14.1467	6.64348	4.50694	0.705255	-0.332267	normal	0.74173	-0.344662	normal	0.444383	-0.792423	normal	0.0483475	-1.24403	normal	[RTKL]	--	Molecular Function: cyclin-dependent protein serine/threonine kinase activity (GO:0004693);; Molecular Function: ATP binding (GO:0005524);; Biological Process: protein phosphorylation (GO:0006468);; Molecular Function: RNA polymerase II carboxy-terminal domain kinase activity (GO:0008353);;	K08818|3.39467e-102|sita:101752887|cyclin-dependent kinase G-1-like; K08818 cell division cycle 2-like [EC:2.7.11.22] (A)	[R]	General function prediction only	Protein kinase domain;; Protein tyrosine kinase	Cyclin-dependent kinase G-1 OS=Oryza sativa subsp. japonica (Rice) PE=2 SV=1	R	General function prediction only	PREDICTED: cyclin-dependent kinase G-1-like isoform X1 [Setaria italica]	biological process: metabolic process (GO:0008152);; biological process: cellular process (GO:0009987);; biological process: biological regulation (GO:0065007);; molecular function: catalytic activity (GO:0003824);; molecular function: binding (GO:0005488)	--
BMK_Unigene_050027	CMGC_CDK-PITSLRE	PK	82.3765	66.77	75.618	107.954	91.9171	94.8146	0.789455	0.207303	normal	0.931872	0.0907404	normal	0.751897	-0.358639	normal	0.761284	-0.220134	normal	[RTKL]	--	Molecular Function: cyclin-dependent protein serine/threonine kinase activity (GO:0004693);; Molecular Function: ATP binding (GO:0005524);; Biological Process: protein phosphorylation (GO:0006468);; Molecular Function: RNA polymerase II carboxy-terminal domain kinase activity (GO:0008353);;	K08818|0|sita:101779139|cyclin-dependent kinase G-2-like; K08818 cell division cycle 2-like [EC:2.7.11.22] (A)	[R]	General function prediction only	Protein kinase domain;; Protein tyrosine kinase;; Kinase-like	Cyclin-dependent kinase G-2 GN=OJ991113_30.14 OS=Oryza sativa subsp. japonica (Rice) PE=2 SV=2	T	Signal transduction mechanisms	PREDICTED: cyclin-dependent kinase G-2-like isoform X1 [Setaria italica]	biological process: metabolic process (GO:0008152);; biological process: cellular process (GO:0009987);; biological process: biological regulation (GO:0065007);; molecular function: catalytic activity (GO:0003824);; molecular function: binding (GO:0005488)	--
BMK_Unigene_051477	CMGC_CDK-PITSLRE	PK	5.09903	3.10505	2.62475	9.03898	4.35501	3.2175	0.587198	-1.13143	normal	0.542779	-1.23853	normal	0.751897	-0.726819	normal	0.823106	-0.481359	normal	[RTKL]	--	Molecular Function: cyclin-dependent protein serine/threonine kinase activity (GO:0004693);; Molecular Function: ATP binding (GO:0005524);; Biological Process: protein phosphorylation (GO:0006468);; Molecular Function: RNA polymerase II carboxy-terminal domain kinase activity (GO:0008353);;	K08818|6.16199e-97|sita:101752887|cyclin-dependent kinase G-1-like; K08818 cell division cycle 2-like [EC:2.7.11.22] (A)	[R]	General function prediction only	Protein kinase domain	Cyclin-dependent kinase G-1 OS=Oryza sativa subsp. japonica (Rice) PE=2 SV=1	R	General function prediction only	PREDICTED: cyclin-dependent kinase G-1-like isoform X1 [Setaria italica]	biological process: metabolic process (GO:0008152);; biological process: cellular process (GO:0009987);; biological process: biological regulation (GO:0065007);; molecular function: catalytic activity (GO:0003824);; molecular function: binding (GO:0005488)	--
BMK_Unigene_090274	CMGC_CDK-PITSLRE	PK	5.39304	3.00961	2.37213	11.1679	5.16526	3.97911	0.324569	-0.920144	normal	0.156876	-1.4152	normal	0.204043	-0.93279	normal	0.0186449	-1.21468	normal	[RTKL]	--	Molecular Function: cyclin-dependent protein serine/threonine kinase activity (GO:0004693);; Molecular Function: ATP binding (GO:0005524);; Biological Process: protein phosphorylation (GO:0006468);; Molecular Function: RNA polymerase II carboxy-terminal domain kinase activity (GO:0008353);;	K08818|6.1389e-95|sita:101752887|cyclin-dependent kinase G-1-like; K08818 cell division cycle 2-like [EC:2.7.11.22] (A)	[R]	General function prediction only	Protein kinase domain	Cyclin-dependent kinase G-1 OS=Oryza sativa subsp. japonica (Rice) PE=2 SV=1	R	General function prediction only	PREDICTED: cyclin-dependent kinase G-1-like isoform X1 [Setaria italica]	biological process: metabolic process (GO:0008152);; biological process: cellular process (GO:0009987);; biological process: biological regulation (GO:0065007);; molecular function: catalytic activity (GO:0003824);; molecular function: binding (GO:0005488)	--
BMK_Unigene_091234	CMGC_CDK-PITSLRE	PK	66.411	53.7878	60.6709	89.3009	76.4535	77.5122	0.942813	0.0656887	normal	0.871206	0.137539	normal	0.987016	-0.0238816	normal	0.703095	-0.22582	normal	[RTKL]	--	Molecular Function: cyclin-dependent protein serine/threonine kinase activity (GO:0004693);; Molecular Function: ATP binding (GO:0005524);; Biological Process: protein phosphorylation (GO:0006468);; Molecular Function: RNA polymerase II carboxy-terminal domain kinase activity (GO:0008353);;	K08818|0|sita:101779139|cyclin-dependent kinase G-2-like; K08818 cell division cycle 2-like [EC:2.7.11.22] (A)	[R]	General function prediction only	Protein kinase domain;; Protein tyrosine kinase;; Kinase-like	Cyclin-dependent kinase G-2 GN=OJ991113_30.14 OS=Oryza sativa subsp. japonica (Rice) PE=2 SV=2	T	Signal transduction mechanisms	PREDICTED: cyclin-dependent kinase G-2-like isoform X1 [Setaria italica]	biological process: metabolic process (GO:0008152);; biological process: cellular process (GO:0009987);; biological process: biological regulation (GO:0065007);; molecular function: catalytic activity (GO:0003824);; molecular function: binding (GO:0005488)	--
BMK_Unigene_105472	CMGC_CDK-PITSLRE	PK	0	0	0	0	0	0	--	--	--	--	--	--	--	--	--	--	--	--	[RTKL]	--	Molecular Function: cyclin-dependent protein serine/threonine kinase activity (GO:0004693);; Molecular Function: ATP binding (GO:0005524);; Biological Process: protein phosphorylation (GO:0006468);; Molecular Function: RNA polymerase II carboxy-terminal domain kinase activity (GO:0008353);;	K08818|3.06434e-32|rcu:RCOM_1506890|cdk10/11, putative (EC:2.7.11.23); K08818 cell division cycle 2-like [EC:2.7.11.22] (A)	[R]	General function prediction only	Protein kinase domain	Cyclin-dependent kinase G-1 OS=Oryza sativa subsp. japonica (Rice) PE=2 SV=1	R	General function prediction only	Putative CMGC/CDK protein kinase [Rhizopus microsporus]	biological process: metabolic process (GO:0008152);; biological process: cellular process (GO:0009987);; biological process: biological regulation (GO:0065007);; molecular function: catalytic activity (GO:0003824);; molecular function: binding (GO:0005488)	--
BMK_Unigene_003048	CMGC_CDK-Pl	PK	7.29371	2.91178	2.60154	6.54628	3.61235	3.10034	0.335903	-0.92635	normal	0.345804	-0.930373	normal	0.751897	-0.591185	normal	0.672062	-0.61633	normal	[RTKL]	--	Biological Process: mitotic cell cycle (GO:0000278);; Biological Process: cytokinesis (GO:0000910);; Molecular Function: cyclin-dependent protein serine/threonine kinase activity (GO:0004693);; Molecular Function: ATP binding (GO:0005524);; Cellular Component: nucleus (GO:0005634);; Cellular Component: cytosol (GO:0005829);; Cellular Component: plasma membrane (GO:0005886);; Biological Process: c…	K02206|0|sita:101771773|cyclin-dependent kinase A-2-like; K02206 cyclin-dependent kinase 2 [EC:2.7.11.22] (A)	[R]	General function prediction only	Protein kinase domain;; Protein tyrosine kinase	Cyclin-dependent kinase A-2 OS=Oryza sativa subsp. japonica (Rice) PE=2 SV=1	D	Cell cycle control, cell division, chromosome partitioning	PREDICTED: cyclin-dependent kinase A-2-like isoform X2 [Setaria italica]	biological process: cellular process (GO:0009987);; biological process: single-organism process (GO:0044699);; biological process: metabolic process (GO:0008152);; biological process: biological regulation (GO:0065007);; molecular function: catalytic activity (GO:0003824);; molecular function: binding (GO:0005488);; cellular component: cell (GO:0005623);; cellular component: organelle (GO:0043226…	--
BMK_Unigene_017839	CMGC_CDK-Pl	PK	0.113236	3.92266	0.102226	0.0854791	0.0840404	0.0207012	3.65977e-05	4.91282	up	0.959029	0.205585	normal	0.987796	0.0670703	normal	0.861536	-0.472899	normal	[RTKL]	--	--	K02206|9.36065e-110|pop:POPTR_0004s14080g|POPTRDRAFT_648419; Cell division control protein 2 1; K02206 cyclin-dependent kinase 2 [EC:2.7.11.22] (A)	[R]	General function prediction only	Protein kinase domain;; Protein tyrosine kinase	Cell division control protein 2 homolog A GN=CDC2A OS=Antirrhinum majus (Garden snapdragon) PE=2 SV=2	R	General function prediction only	cyclin-dependent kinase [Rhizoctonia solani 123E]	--	--
BMK_Unigene_021850	CMGC_CDK-Pl	PK	0	0.171347	0.119517	0	0.0567624	0.171565	0.60326	1.59606	normal	0.650012	1.3802	normal	--	--	--	0.699326	1.05959	normal	[RTKL]	--	Molecular Function: nucleotide binding (GO:0000166);; Molecular Function: protein kinase activity (GO:0004672);; Biological Process: phosphorylation (GO:0016310);;	K02206|7.25095e-41|pvu:PHAVU_002G202100g|hypothetical protein; K02206 cyclin-dependent kinase 2 [EC:2.7.11.22] (A)	[R]	General function prediction only	Protein kinase domain	Cyclin-dependent kinase A-2 OS=Oryza sativa subsp. japonica (Rice) PE=2 SV=1	D	Cell cycle control, cell division, chromosome partitioning	hypothetical protein PHYSODRAFT_554092 [Phytophthora sojae]	molecular function: binding (GO:0005488);; biological process: metabolic process (GO:0008152);; biological process: cellular process (GO:0009987);; molecular function: catalytic activity (GO:0003824)	--
BMK_Unigene_026590	CMGC_CDK-Pl	PK	0.364254	0.250656	0.158019	0.20056	0.049821	0.297943	0.978424	-0.0841758	normal	0.907981	-0.420812	normal	0.862659	-0.558482	normal	0.849638	0.541823	normal	[RTKL]	--	Biological Process: cytokinesis (GO:0000910);; Molecular Function: cyclin-dependent protein serine/threonine kinase activity (GO:0004693);; Molecular Function: ATP binding (GO:0005524);; Cellular Component: nucleus (GO:0005634);; Cellular Component: cytosol (GO:0005829);; Cellular Component: plasma membrane (GO:0005886);; Biological Process: cellular response to nitrogen starvation (GO:0006995);;…	K02206|1.21463e-50|pop:POPTR_0004s14080g|POPTRDRAFT_648419; Cell division control protein 2 1; K02206 cyclin-dependent kinase 2 [EC:2.7.11.22] (A)	[R]	General function prediction only	Protein kinase domain	Cell division control protein 2 homolog A GN=CDC2A OS=Antirrhinum majus (Garden snapdragon) PE=2 SV=2	T	Signal transduction mechanisms	cyclin-dependent kinase [Antirrhinum majus]	biological process: cellular process (GO:0009987);; biological process: single-organism process (GO:0044699);; biological process: metabolic process (GO:0008152);; biological process: biological regulation (GO:0065007);; molecular function: catalytic activity (GO:0003824);; molecular function: binding (GO:0005488);; cellular component: cell (GO:0005623);; cellular component: organelle (GO:0043226…	--
BMK_Unigene_045060	CMGC_CDK-Pl	PK	5.43458	0.318906	0.14551	4.89764	1.43544	1.62658	0.000842008	-3.34152	down	0.000143966	-3.77787	down	0.333234	-1.35126	normal	0.577526	-0.765665	normal	[RTKL]	--	Cellular Component: cyclin-dependent protein kinase holoenzyme complex (GO:0000307);; Molecular Function: cyclin-dependent protein serine/threonine kinase activity (GO:0004693);; Molecular Function: ATP binding (GO:0005524);; Cellular Component: nucleus (GO:0005634);; Cellular Component: spindle (GO:0005819);; Biological Process: mitotic nuclear division (GO:0007067);; Molecular Function: RNA pol…	K07760|0|sita:101783359|cyclin-dependent kinase B2-1-like; K07760 cyclin-dependent kinase [EC:2.7.11.22] (A)	[R]	General function prediction only	Protein kinase domain;; Protein tyrosine kinase;; Phosphotransferase enzyme family	Cyclin-dependent kinase B2-1 OS=Oryza sativa subsp. japonica (Rice) PE=1 SV=1	D	Cell cycle control, cell division, chromosome partitioning	PREDICTED: cyclin-dependent kinase B2-1-like [Setaria italica]	cellular component: cell (GO:0005623);; cellular component: macromolecular complex (GO:0032991);; cellular component: cell part (GO:0044464);; biological process: metabolic process (GO:0008152);; biological process: cellular process (GO:0009987);; biological process: biological regulation (GO:0065007);; molecular function: catalytic activity (GO:0003824);; molecular function: binding (GO:0005488)…	--
BMK_Unigene_058311	CMGC_CDK-Pl	PK	0	0.308284	0.123818	0	0	0.11559	0.449837	2.31559	normal	0.650012	1.43022	normal	--	--	--	0.699326	0.884653	normal	[RTKL]	--	Molecular Function: protein serine/threonine kinase activity (GO:0004674);; Molecular Function: ATP binding (GO:0005524);; Biological Process: protein phosphorylation (GO:0006468);; Biological Process: cell division (GO:0051301);;	K02206|5.30262e-53|tcc:TCM_036766|Cell division control 2 isoform 1; K02206 cyclin-dependent kinase 2 [EC:2.7.11.22] (A)	[R]	General function prediction only	Protein kinase domain;; Protein tyrosine kinase	Cell division control protein 2 homolog GN=CDC2 OS=Oxybasis rubra (Red goosefoot) PE=2 SV=1	T	Signal transduction mechanisms	unnamed protein product [Albugo candida]	biological process: metabolic process (GO:0008152);; biological process: cellular process (GO:0009987);; molecular function: catalytic activity (GO:0003824);; molecular function: binding (GO:0005488);; biological process: single-organism process (GO:0044699)	--
BMK_Unigene_062843	CMGC_CDK-Pl	PK	0.244281	0	0	0.119018	0	0	0.613943	-1.2798	normal	0.65547	-1.17449	normal	--	--	--	--	--	--	[RTKL]	--	Biological Process: mitotic cell cycle (GO:0000278);; Biological Process: cytokinesis (GO:0000910);; Molecular Function: cyclin-dependent protein serine/threonine kinase activity (GO:0004693);; Molecular Function: ATP binding (GO:0005524);; Cellular Component: nucleus (GO:0005634);; Cellular Component: cytosol (GO:0005829);; Cellular Component: plasma membrane (GO:0005886);; Biological Process: c…	K02206|1.023e-34|sbi:SORBI_01g049350|SORBIDRAFT_01g049350, Sb01g049350; hypothetical protein; K02206 cyclin-dependent kinase 2 [EC:2.7.11.22] (A)	[R]	General function prediction only	Protein kinase domain;; Protein tyrosine kinase	Cyclin-dependent kinase A-1 OS=Oryza sativa subsp. japonica (Rice) PE=1 SV=1	D	Cell cycle control, cell division, chromosome partitioning	hypothetical protein CICLE_v10012320mg [Citrus clementina]	biological process: cellular process (GO:0009987);; biological process: single-organism process (GO:0044699);; biological process: metabolic process (GO:0008152);; biological process: biological regulation (GO:0065007);; molecular function: catalytic activity (GO:0003824);; molecular function: binding (GO:0005488);; cellular component: cell (GO:0005623);; cellular component: organelle (GO:0043226…	--
BMK_Unigene_063210	CMGC_CDK-Pl	PK	0	0	0.17841	0	0	0.0818668	--	--	--	0.650012	1.40591	normal	--	--	--	--	--	--	[RTKL]	--	Molecular Function: protein serine/threonine kinase activity (GO:0004674);; Molecular Function: ATP binding (GO:0005524);; Biological Process: protein phosphorylation (GO:0006468);;	K02206|2.31926e-35|mdm:103438842|cell division control protein 2 homolog; K02206 cyclin-dependent kinase 2 [EC:2.7.11.22] (A)	[UT]	--	Protein kinase domain;; Protein tyrosine kinase	Cell division control protein 2 homolog GN=CDC2 OS=Zea mays (Maize) PE=2 SV=1	D	Cell cycle control, cell division, chromosome partitioning	CDC2 Cell division control 2-like protein [Rozella allomycis CSF55]	biological process: metabolic process (GO:0008152);; biological process: cellular process (GO:0009987);; molecular function: catalytic activity (GO:0003824);; molecular function: binding (GO:0005488)	--
BMK_Unigene_078863	CMGC_CDK-Pl	PK	4.08194	0.305841	0.111623	5.54301	1.58908	1.74076	0.411605	-1.81664	normal	0.239408	-2.30603	normal	0.379795	-1.54229	normal	0.654934	-0.791202	normal	[RTKL]	--	Cellular Component: cyclin-dependent protein kinase holoenzyme complex (GO:0000307);; Molecular Function: cyclin-dependent protein serine/threonine kinase activity (GO:0004693);; Molecular Function: ATP binding (GO:0005524);; Cellular Component: nucleus (GO:0005634);; Cellular Component: spindle (GO:0005819);; Biological Process: mitotic nuclear division (GO:0007067);; Molecular Function: RNA pol…	K07760|4.40928e-128|sita:101783359|cyclin-dependent kinase B2-1-like; K07760 cyclin-dependent kinase [EC:2.7.11.22] (A)	[R]	General function prediction only	Protein kinase domain;; Protein tyrosine kinase	Cyclin-dependent kinase B2-1 OS=Oryza sativa subsp. japonica (Rice) PE=1 SV=1	D	Cell cycle control, cell division, chromosome partitioning	PREDICTED: cyclin-dependent kinase B2-1-like [Setaria italica]	cellular component: cell (GO:0005623);; cellular component: macromolecular complex (GO:0032991);; cellular component: cell part (GO:0044464);; biological process: metabolic process (GO:0008152);; biological process: cellular process (GO:0009987);; biological process: biological regulation (GO:0065007);; molecular function: catalytic activity (GO:0003824);; molecular function: binding (GO:0005488)…	--
BMK_Unigene_078864	CMGC_CDK-Pl	PK	1.12907	0.0537921	0	1.8268	0.557967	0.499907	0.60326	-1.45119	normal	0.650012	-1.33521	normal	0.995137	0.0185018	normal	0.84263	-0.564708	normal	[RTKL]	--	Cellular Component: cyclin-dependent protein kinase holoenzyme complex (GO:0000307);; Molecular Function: cyclin-dependent protein serine/threonine kinase activity (GO:0004693);; Molecular Function: ATP binding (GO:0005524);; Cellular Component: nucleus (GO:0005634);; Cellular Component: spindle (GO:0005819);; Biological Process: mitotic nuclear division (GO:0007067);; Molecular Function: RNA pol…	K07760|1.29178e-67|sita:101783359|cyclin-dependent kinase B2-1-like; K07760 cyclin-dependent kinase [EC:2.7.11.22] (A)	[R]	General function prediction only	Protein kinase domain;; Protein tyrosine kinase	Cyclin-dependent kinase B2-1 OS=Oryza sativa subsp. japonica (Rice) PE=1 SV=1	D	Cell cycle control, cell division, chromosome partitioning	PREDICTED: cyclin-dependent kinase B2-1-like [Setaria italica]	cellular component: cell (GO:0005623);; cellular component: macromolecular complex (GO:0032991);; cellular component: cell part (GO:0044464);; biological process: metabolic process (GO:0008152);; biological process: cellular process (GO:0009987);; biological process: biological regulation (GO:0065007);; molecular function: catalytic activity (GO:0003824);; molecular function: binding (GO:0005488)…	--
BMK_Unigene_082662	CMGC_CDK-Pl	PK	45.78	27.8863	22.7318	37.109	33.2753	34.8137	0.60326	-0.330765	normal	0.552087	-0.500331	normal	0.903613	0.120186	normal	0.601862	0.302869	normal	[RTKL]	--	Biological Process: cytokinesis (GO:0000910);; Molecular Function: cyclin-dependent protein serine/threonine kinase activity (GO:0004693);; Molecular Function: protein binding (GO:0005515);; Molecular Function: ATP binding (GO:0005524);; Cellular Component: nucleus (GO:0005634);; Cellular Component: cytosol (GO:0005829);; Cellular Component: plasma membrane (GO:0005886);; Biological Process: prot…	K02206|0|sita:101758525|cell division control protein 2 homolog; K02206 cyclin-dependent kinase 2 [EC:2.7.11.22] (A)	[R]	General function prediction only	Protein kinase domain;; Protein tyrosine kinase;; Kinase-like	Cell division control protein 2 homolog GN=CDC2 OS=Zea mays (Maize) PE=2 SV=1	D	Cell cycle control, cell division, chromosome partitioning	PREDICTED: cell division control protein 2 homolog [Setaria italica]	biological process: cellular process (GO:0009987);; biological process: single-organism process (GO:0044699);; biological process: metabolic process (GO:0008152);; biological process: biological regulation (GO:0065007);; molecular function: catalytic activity (GO:0003824);; molecular function: binding (GO:0005488);; cellular component: cell (GO:0005623);; cellular component: organelle (GO:0043226…	--
BMK_Unigene_086713	CMGC_CDK-Pl	PK	0.139836	0	0.0404058	0.557861	0.498561	1.85987	0.60326	-1.61688	normal	0.938007	-0.316944	normal	0.924126	-0.309909	normal	0.0976841	1.6437	normal	[RTKL]	--	Molecular Function: cyclin-dependent protein serine/threonine kinase activity (GO:0004693);; Molecular Function: ATP binding (GO:0005524);; Biological Process: protein phosphorylation (GO:0006468);; Biological Process: mitotic nuclear division (GO:0007067);; Molecular Function: RNA polymerase II carboxy-terminal domain kinase activity (GO:0008353);; Biological Process: cell division (GO:0051301);;	K02206|1.29854e-133|sot:102588875|cell division control protein 2 homolog A-like; K02206 cyclin-dependent kinase 2 [EC:2.7.11.22] (A)	[R]	General function prediction only	Protein kinase domain;; Protein tyrosine kinase;; Kinase-like	Cell division control protein 2 homolog A GN=CDC2A OS=Antirrhinum majus (Garden snapdragon) PE=2 SV=2	--	--	cell division protein kinase, putative [Phytophthora infestans T30-4]	biological process: metabolic process (GO:0008152);; biological process: cellular process (GO:0009987);; biological process: biological regulation (GO:0065007);; molecular function: catalytic activity (GO:0003824);; molecular function: binding (GO:0005488);; biological process: single-organism process (GO:0044699);; biological process: cellular component organization or biogenesis (GO:0071840)	--
BMK_Unigene_016414	CMGC_CK2	PK	87.9116	63.3708	58.3729	92.2659	69.6535	76.7032	0.872099	-0.0942322	normal	0.926713	-0.0663474	normal	0.904787	-0.114197	normal	0.833855	0.114402	normal	[RTKL]	--	Molecular Function: sequence-specific DNA binding transcription factor activity (GO:0003700);; Molecular Function: protein serine/threonine kinase activity (GO:0004674);; Molecular Function: protein tyrosine kinase activity (GO:0004713);; Molecular Function: ATP binding (GO:0005524);; Cellular Component: plasma membrane (GO:0005886);; Biological Process: regulation of transcription, DNA-templated…	K03097|0|sita:101759174|casein kinase II subunit alpha-like; K03097 casein kinase II subunit alpha [EC:2.7.11.1] (A)	[TDK]	--	Protein kinase domain;; Protein tyrosine kinase;; Phosphotransferase enzyme family	Casein kinase II subunit alpha GN=ACK2 OS=Zea mays (Maize) PE=1 SV=1	--	--	casein kinase II subunit alpha-2 [Zea mays]	biological process: biological regulation (GO:0065007);; molecular function: nucleic acid binding transcription factor activity (GO:0001071);; biological process: metabolic process (GO:0008152);; biological process: cellular process (GO:0009987);; molecular function: catalytic activity (GO:0003824);; biological process: single-organism process (GO:0044699);; molecular function: binding (GO:000548…	Ribosome biogenesis in eukaryotes (ko03008);; Circadian rhythm - plant (ko04712)
BMK_Unigene_020164	CMGC_CK2	PK	10.8207	7.52146	8.90052	9.47702	13.4554	8.77434	0.886065	-0.140962	normal	0.79807	0.249211	normal	0.563556	0.764358	normal	0.770713	0.259106	normal	[RTKL]	--	Molecular Function: sequence-specific DNA binding transcription factor activity (GO:0003700);; Molecular Function: protein serine/threonine kinase activity (GO:0004674);; Molecular Function: protein tyrosine kinase activity (GO:0004713);; Molecular Function: ATP binding (GO:0005524);; Cellular Component: plasma membrane (GO:0005886);; Biological Process: DNA repair (GO:0006281);; Biological Proce…	K03097|7.90116e-80|zma:542637|gpm388c, ACK2; LOC542637 (EC:2.7.11.1); K03097 casein kinase II subunit alpha [EC:2.7.11.1] (A)	[TDK]	--	Protein kinase domain;; Protein tyrosine kinase;; Phosphotransferase enzyme family	Casein kinase II subunit alpha GN=ACK2 OS=Zea mays (Maize) PE=1 SV=1	T	Signal transduction mechanisms	hypothetical protein OsJ_12682 [Oryza sativa Japonica Group]	biological process: biological regulation (GO:0065007);; molecular function: nucleic acid binding transcription factor activity (GO:0001071);; biological process: metabolic process (GO:0008152);; biological process: cellular process (GO:0009987);; molecular function: catalytic activity (GO:0003824);; biological process: single-organism process (GO:0044699);; molecular function: binding (GO:000548…	Ribosome biogenesis in eukaryotes (ko03008);; Circadian rhythm - plant (ko04712)
BMK_Unigene_020657	CMGC_CK2	PK	13.3582	8.45931	6.71684	10.2408	12.2967	7.61021	0.638997	-0.283344	normal	0.58935	-0.470756	normal	0.751897	0.513018	normal	0.96749	-0.05145	normal	[RTKL]	--	Molecular Function: protein serine/threonine kinase activity (GO:0004674);; Molecular Function: ATP binding (GO:0005524);; Cellular Component: mitochondrion (GO:0005739);; Cellular Component: cytosol (GO:0005829);; Biological Process: protein phosphorylation (GO:0006468);;	K03097|0|sita:101755928|casein kinase II subunit alpha, chloroplastic-like; K03097 casein kinase II subunit alpha [EC:2.7.11.1] (A)	[TDK]	--	Protein kinase domain;; Protein tyrosine kinase;; Protein kinase domain;; Protein tyrosine kinase;; Phosphotransferase enzyme family	Casein kinase II subunit alpha, chloroplastic (Precursor) GN=At2g23070 OS=Arabidopsis thaliana (Mouse-ear cress) PE=2 SV=1	T	Signal transduction mechanisms	PREDICTED: casein kinase II subunit alpha, chloroplastic-like [Setaria italica]	biological process: metabolic process (GO:0008152);; biological process: cellular process (GO:0009987);; molecular function: catalytic activity (GO:0003824);; molecular function: binding (GO:0005488);; cellular component: cell (GO:0005623);; cellular component: organelle (GO:0043226);; cellular component: cell part (GO:0044464)	Ribosome biogenesis in eukaryotes (ko03008);; Circadian rhythm - plant (ko04712)
BMK_Unigene_054180	CMGC_CK2	PK	0.0583395	0.679887	0	0.11073	0.108177	0	0.2442	2.76075	normal	--	--	--	0.987016	0.0780905	normal	0.699326	-0.791066	normal	[RTKL]	--	Molecular Function: protein serine/threonine kinase activity (GO:0004674);; Molecular Function: ATP binding (GO:0005524);; Biological Process: protein phosphorylation (GO:0006468);;	K03097|1.57553e-80|ppp:PHYPADRAFT_183198|hypothetical protein; K03097 casein kinase II subunit alpha [EC:2.7.11.1] (A)	[TDK]	--	Protein kinase domain	Casein kinase II subunit alpha-1 (Precursor) GN=CKA1 OS=Arabidopsis thaliana (Mouse-ear cress) PE=1 SV=3	T	Signal transduction mechanisms	Casein kinase II subunit alpha [Wallemia ichthyophaga EXF-994]	biological process: metabolic process (GO:0008152);; biological process: cellular process (GO:0009987);; molecular function: catalytic activity (GO:0003824);; molecular function: binding (GO:0005488)	Ribosome biogenesis in eukaryotes (ko03008);; Circadian rhythm - plant (ko04712)
BMK_Unigene_056229	CMGC_CK2	PK	0.475741	0	0	0	0.26325	0.316634	0.462665	-2.26375	normal	0.543632	-2.0681	normal	0.751897	0.924937	normal	0.571433	1.54253	normal	[RTKL]	--	Molecular Function: protein serine/threonine kinase activity (GO:0004674);; Molecular Function: ATP binding (GO:0005524);; Biological Process: protein phosphorylation (GO:0006468);;	K03097|1.09941e-30|csl:COCSUDRAFT_13384|casein kinase II alpha subunit; K03097 casein kinase II subunit alpha [EC:2.7.11.1] (A)	[TDK]	--	Protein kinase domain	Casein kinase II subunit alpha-2 (Precursor) GN=CKA2 OS=Arabidopsis thaliana (Mouse-ear cress) PE=2 SV=3	T	Signal transduction mechanisms	hypothetical protein SETTUDRAFT_148414 [Setosphaeria turcica Et28A]	biological process: metabolic process (GO:0008152);; biological process: cellular process (GO:0009987);; molecular function: catalytic activity (GO:0003824);; molecular function: binding (GO:0005488)	Ribosome biogenesis in eukaryotes (ko03008);; Circadian rhythm - plant (ko04712)
BMK_Unigene_058566	CMGC_CK2	PK	0.113717	0	0	0	0	0	--	--	--	--	--	--	--	--	--	--	--	--	[RTKL]	--	Molecular Function: protein serine/threonine kinase activity (GO:0004674);; Molecular Function: ATP binding (GO:0005524);; Biological Process: protein phosphorylation (GO:0006468);;	K03097|1.69298e-36|csl:COCSUDRAFT_13384|casein kinase II alpha subunit; K03097 casein kinase II subunit alpha [EC:2.7.11.1] (A)	[TDK]	--	Protein kinase domain	Casein kinase II subunit alpha, chloroplastic (Precursor) GN=At2g23070 OS=Arabidopsis thaliana (Mouse-ear cress) PE=2 SV=1	T	Signal transduction mechanisms	alpha subunit of casein kinase [Ophiocordyceps sinensis CO18]	biological process: metabolic process (GO:0008152);; biological process: cellular process (GO:0009987);; molecular function: catalytic activity (GO:0003824);; molecular function: binding (GO:0005488)	Ribosome biogenesis in eukaryotes (ko03008);; Circadian rhythm - plant (ko04712)
BMK_Unigene_068668	CMGC_CK2	PK	0.071497	0.497028	0	0	0.276109	0	0.556697	1.89412	normal	--	--	--	0.751897	1.14809	normal	--	--	--	[RTKL]	--	Molecular Function: protein serine/threonine kinase activity (GO:0004674);; Molecular Function: ATP binding (GO:0005524);; Biological Process: protein phosphorylation (GO:0006468);;	K03097|1.12576e-26|csl:COCSUDRAFT_13384|casein kinase II alpha subunit; K03097 casein kinase II subunit alpha [EC:2.7.11.1] (A)	[TDK]	--	Protein kinase domain	Casein kinase II subunit alpha-1 (Precursor) GN=CKA1 OS=Arabidopsis thaliana (Mouse-ear cress) PE=1 SV=3	T	Signal transduction mechanisms	CMGC/CK2 protein kinase [Gaeumannomyces graminis var. tritici R3-111a-1]	biological process: metabolic process (GO:0008152);; biological process: cellular process (GO:0009987);; molecular function: catalytic activity (GO:0003824);; molecular function: binding (GO:0005488)	Ribosome biogenesis in eukaryotes (ko03008);; Circadian rhythm - plant (ko04712)
BMK_Unigene_104160	CMGC_CK2	PK	0.121293	0	0.237434	0	0	0.219286	--	--	--	0.882384	0.509634	normal	--	--	--	0.699326	0.884471	normal	[RTKL]	--	Molecular Function: protein serine/threonine kinase activity (GO:0004674);; Molecular Function: ATP binding (GO:0005524);; Biological Process: protein phosphorylation (GO:0006468);;	K03097|2.17064e-17|zma:542460|cka2, CK2; CK2 protein kinase alpha 2; K03097 casein kinase II subunit alpha [EC:2.7.11.1] (A)	[TDK]	--	Protein kinase domain	Casein kinase II subunit alpha GN=ACK2 OS=Zea mays (Maize) PE=1 SV=1	T	Signal transduction mechanisms	casein kinase II catalytic subunit [Arabidopsis thaliana]	biological process: metabolic process (GO:0008152);; biological process: cellular process (GO:0009987);; molecular function: catalytic activity (GO:0003824);; molecular function: binding (GO:0005488)	Ribosome biogenesis in eukaryotes (ko03008);; Circadian rhythm - plant (ko04712)
BMK_Unigene_009199	CMGC_CLK	PK	15.6609	12.571	13.5679	15.8863	12.1511	13.3662	0.914121	0.0784351	normal	0.565157	0.448432	normal	0.990948	-0.0136651	normal	0.699326	0.278284	normal	[RTKL]	--	Molecular Function: protein serine/threonine kinase activity (GO:0004674);; Molecular Function: ATP binding (GO:0005524);; Biological Process: protein phosphorylation (GO:0006468);;	K08287|4.65688e-133|sita:101780601|serine/threonine-protein kinase AFC2-like; K08287 dual-specificity kinase [EC:2.7.12.1] (A)	[T]	Signal transduction mechanisms	Protein kinase domain;; Protein tyrosine kinase;; Protein kinase domain	Serine/threonine-protein kinase AFC1 GN=F4P12_270 OS=Arabidopsis thaliana (Mouse-ear cress) PE=2 SV=2	T	Signal transduction mechanisms	PREDICTED: serine/threonine-protein kinase AFC2-like isoform X1 [Setaria italica]	biological process: metabolic process (GO:0008152);; biological process: cellular process (GO:0009987);; molecular function: catalytic activity (GO:0003824);; molecular function: binding (GO:0005488)	--
BMK_Unigene_022522	CMGC_CLK	PK	0.120285	0	0.410924	0	0	0.386629	0.613943	-1.27633	normal	0.683183	1.16761	normal	--	--	--	0.458077	1.83937	normal	[RTKL]	--	Molecular Function: protein serine/threonine kinase activity (GO:0004674);; Molecular Function: ATP binding (GO:0005524);; Biological Process: protein phosphorylation (GO:0006468);;	K08287|7.89804e-32|zma:100194024|putative protein kinase superfamily protein isoform 1; K08287 dual-specificity kinase [EC:2.7.12.1] (A)	[T]	Signal transduction mechanisms	Protein kinase domain	Serine/threonine-protein kinase AFC3 GN=F4D11.140 OS=Arabidopsis thaliana (Mouse-ear cress) PE=2 SV=2	T	Signal transduction mechanisms	protein kinase [Colletotrichum gloeosporioides Nara gc5]	biological process: metabolic process (GO:0008152);; biological process: cellular process (GO:0009987);; molecular function: catalytic activity (GO:0003824);; molecular function: binding (GO:0005488)	--
BMK_Unigene_043927	CMGC_CLK	PK	14.9844	7.79303	7.9571	13.6042	10.3138	9.44909	0.391479	-0.566146	normal	0.637482	-0.384905	normal	0.946217	-0.0785423	normal	0.916203	-0.0768079	normal	[RTKL]	--	Molecular Function: protein serine/threonine kinase activity (GO:0004674);; Molecular Function: protein tyrosine kinase activity (GO:0004713);; Molecular Function: ATP binding (GO:0005524);; Cellular Component: plastid (GO:0009536);; Biological Process: positive regulation of translation (GO:0045727);; Biological Process: protein autophosphorylation (GO:0046777);;	K08287|1.80201e-149|sita:101753013|serine/threonine-protein kinase AFC3-like; K08287 dual-specificity kinase [EC:2.7.12.1] (A)	[T]	Signal transduction mechanisms	Protein kinase domain;; Protein tyrosine kinase	Serine/threonine-protein kinase AFC3 GN=F4D11.140 OS=Arabidopsis thaliana (Mouse-ear cress) PE=2 SV=2	T	Signal transduction mechanisms	PREDICTED: serine/threonine-protein kinase AFC3-like [Setaria italica]	biological process: metabolic process (GO:0008152);; biological process: cellular process (GO:0009987);; molecular function: catalytic activity (GO:0003824);; biological process: single-organism process (GO:0044699);; molecular function: binding (GO:0005488);; cellular component: cell (GO:0005623);; cellular component: organelle (GO:0043226);; cellular component: cell part (GO:0044464);; biologic…	--
BMK_Unigene_048115	CMGC_CLK	PK	24.1072	22.8293	18.5889	23.8183	24.2271	19.1421	0.613943	0.411451	normal	0.650012	0.503842	normal	0.751897	0.459789	normal	0.970858	0.0652586	normal	[RTKL]	--	Molecular Function: protein serine/threonine kinase activity (GO:0004674);; Molecular Function: protein tyrosine kinase activity (GO:0004713);; Molecular Function: ATP binding (GO:0005524);; Biological Process: regulation of transcription, DNA-templated (GO:0006355);; Biological Process: protein phosphorylation (GO:0006468);; Biological Process: positive regulation of translation (GO:0045727);;	K08287|0|sita:101784062|serine/threonine-protein kinase AFC1-like; K08287 dual-specificity kinase [EC:2.7.12.1] (A)	[T]	Signal transduction mechanisms	Protein kinase domain;; Protein tyrosine kinase	Serine/threonine-protein kinase AFC1 GN=F4P12_270 OS=Arabidopsis thaliana (Mouse-ear cress) PE=2 SV=2	T	Signal transduction mechanisms	PREDICTED: serine/threonine-protein kinase AFC1-like isoform X1 [Setaria italica]	biological process: metabolic process (GO:0008152);; biological process: cellular process (GO:0009987);; molecular function: catalytic activity (GO:0003824);; biological process: single-organism process (GO:0044699);; molecular function: binding (GO:0005488);; biological process: biological regulation (GO:0065007)	--
BMK_Unigene_064192	CMGC_CLK	PK	0	0.16558	0	0.160003	0	0	0.60326	1.4473	normal	--	--	--	0.751897	-0.71312	normal	0.699326	-0.770195	normal	[RTKL]	--	Molecular Function: protein serine/threonine kinase activity (GO:0004674);; Molecular Function: ATP binding (GO:0005524);; Biological Process: protein phosphorylation (GO:0006468);;	K08287|2.36654e-22|vvi:100261084|serine/threonine-protein kinase AFC3; K08287 dual-specificity kinase [EC:2.7.12.1] (A)	[T]	Signal transduction mechanisms	Protein kinase domain	Serine/threonine-protein kinase AFC2 GN=AFC2 OS=Arabidopsis thaliana (Mouse-ear cress) PE=1 SV=1	T	Signal transduction mechanisms	serine/threonine protein kinase [Phytophthora infestans T30-4]	biological process: metabolic process (GO:0008152);; biological process: cellular process (GO:0009987);; molecular function: catalytic activity (GO:0003824);; molecular function: binding (GO:0005488)	--
BMK_Unigene_088835	CMGC_CLK	PK	19.5529	18.2801	14.7107	20.0898	19.9004	16.1864	0.8359	0.210036	normal	0.987066	-0.0195502	normal	0.962876	-0.0871503	normal	0.923343	0.11666	normal	[RTKL]	--	Molecular Function: protein serine/threonine kinase activity (GO:0004674);; Molecular Function: protein tyrosine kinase activity (GO:0004713);; Molecular Function: ATP binding (GO:0005524);; Biological Process: regulation of transcription, DNA-templated (GO:0006355);; Biological Process: protein phosphorylation (GO:0006468);; Biological Process: positive regulation of translation (GO:0045727);;	K08287|0|sita:101784062|serine/threonine-protein kinase AFC1-like; K08287 dual-specificity kinase [EC:2.7.12.1] (A)	[T]	Signal transduction mechanisms	Protein kinase domain;; Protein tyrosine kinase	Serine/threonine-protein kinase AFC1 GN=F4P12_270 OS=Arabidopsis thaliana (Mouse-ear cress) PE=2 SV=2	--	--	PREDICTED: serine/threonine-protein kinase AFC1-like isoform X1 [Setaria italica]	biological process: metabolic process (GO:0008152);; biological process: cellular process (GO:0009987);; molecular function: catalytic activity (GO:0003824);; biological process: single-organism process (GO:0044699);; molecular function: binding (GO:0005488);; biological process: biological regulation (GO:0065007)	--
BMK_Unigene_001114	CMGC_DYRK-PRP4	PK	17.5132	10.7928	9.57536	19.1548	14.1175	10.233	0.60326	-0.306959	normal	0.650012	-0.334708	normal	0.866617	-0.150249	normal	0.2439	-0.534415	normal	[RTKL]	--	Molecular Function: protein serine/threonine kinase activity (GO:0004674);; Molecular Function: ATP binding (GO:0005524);; Cellular Component: cytosol (GO:0005829);; Cellular Component: plasma membrane (GO:0005886);; Biological Process: protein phosphorylation (GO:0006468);;	--	[R]	General function prediction only	Protein kinase domain;; Protein tyrosine kinase;; Acyltransferase	Glycerol-3-phosphate 2-O-acyltransferase 6 GN=GPAT6 OS=Arabidopsis thaliana (Mouse-ear cress) PE=1 SV=1	T	Signal transduction mechanisms	PREDICTED: uncharacterized protein LOC101776185 [Setaria italica]	biological process: metabolic process (GO:0008152);; biological process: cellular process (GO:0009987);; molecular function: catalytic activity (GO:0003824);; molecular function: binding (GO:0005488);; cellular component: cell (GO:0005623);; cellular component: cell part (GO:0044464);; cellular component: membrane (GO:0016020)	--
BMK_Unigene_013418	CMGC_DYRK-PRP4	PK	4.6354	2.77091	2.35475	5.28209	4.30083	2.5991	0.613943	-0.365537	normal	0.650012	-0.437179	normal	0.987796	-0.0222727	normal	0.415621	-0.635935	normal	[RTKL]	--	Molecular Function: protein serine/threonine kinase activity (GO:0004674);; Molecular Function: ATP binding (GO:0005524);; Cellular Component: cytoplasm (GO:0005737);; Biological Process: protein phosphorylation (GO:0006468);;	--	[R]	General function prediction only	Protein kinase domain;; Protein tyrosine kinase	Serine/threonine-protein kinase AFC2 GN=AFC2 OS=Arabidopsis thaliana (Mouse-ear cress) PE=1 SV=1	T	Signal transduction mechanisms	PREDICTED: probable serine/threonine-protein kinase dyrk1-like [Setaria italica]	biological process: metabolic process (GO:0008152);; biological process: cellular process (GO:0009987);; molecular function: catalytic activity (GO:0003824);; molecular function: binding (GO:0005488);; cellular component: cell (GO:0005623);; cellular component: cell part (GO:0044464)	--
BMK_Unigene_034154	CMGC_DYRK-PRP4	PK	0.19986	0.239026	0.376054	1.77936	0.75223	1.00167	0.549673	1.95626	normal	--	--	--	0.613501	-1.77885	normal	0.939058	0.246309	normal	[RTKL]	--	Molecular Function: transferase activity, transferring phosphorus-containing groups (GO:0016772);; Cellular Component: intracellular membrane-bounded organelle (GO:0043231);;	K08827|0|sita:101761466|serine/threonine-protein kinase PRP4 homolog; K08827 serine/threonine-protein kinase PRP4 [EC:2.7.11.1] (A)	[A]	RNA processing and modification	Protein kinase domain;; Protein tyrosine kinase;; Protein kinase domain	Serine/threonine-protein kinase AFC3 GN=F4D11.140 OS=Arabidopsis thaliana (Mouse-ear cress) PE=2 SV=2	A	RNA processing and modification	PREDICTED: serine/threonine-protein kinase PRP4 homolog [Setaria italica]	biological process: metabolic process (GO:0008152);; molecular function: catalytic activity (GO:0003824);; cellular component: cell (GO:0005623);; cellular component: organelle (GO:0043226);; cellular component: cell part (GO:0044464)	--
BMK_Unigene_048842	CMGC_DYRK-PRP4	PK	9.54546	2.53577	1.97218	7.28932	3.88582	2.11861	0.252006	-1.1187	normal	0.0121538	-2.00447	normal	0.678745	-0.838163	normal	0.00198857	-2.20235	down	[RTKL]	--	Molecular Function: protein serine/threonine kinase activity (GO:0004674);; Molecular Function: ATP binding (GO:0005524);; Cellular Component: cytoplasm (GO:0005737);; Biological Process: protein phosphorylation (GO:0006468);;	--	[R]	General function prediction only	Protein kinase domain;; Protein tyrosine kinase	Serine/threonine-protein kinase AFC3 GN=F4D11.140 OS=Arabidopsis thaliana (Mouse-ear cress) PE=2 SV=2	--	--	PREDICTED: protein kinase C-like 1-like [Setaria italica]	biological process: metabolic process (GO:0008152);; biological process: cellular process (GO:0009987);; molecular function: catalytic activity (GO:0003824);; molecular function: binding (GO:0005488);; cellular component: cell (GO:0005623);; cellular component: cell part (GO:0044464)	--
BMK_Unigene_050329	CMGC_DYRK-PRP4	PK	19.8143	13.0586	12.9021	22.7664	19.2544	19.1268	0.742968	-0.212831	normal	0.820667	-0.213426	normal	0.751897	-0.320479	normal	0.680531	-0.337369	normal	[RTKL]	--	Molecular Function: protein serine/threonine kinase activity (GO:0004674);; Molecular Function: ATP binding (GO:0005524);; Cellular Component: nucleus (GO:0005634);; Biological Process: protein phosphorylation (GO:0006468);; Cellular Component: plastid (GO:0009536);;	K08827|0|sita:101762555|serine/threonine-protein kinase PRP4 homolog; K08827 serine/threonine-protein kinase PRP4 [EC:2.7.11.1] (A)	[A]	RNA processing and modification	Protein kinase domain;; Protein tyrosine kinase;; 2OG-Fe(II) oxygenase superfamily;; non-haem dioxygenase in morphine synthesis N-terminal	Serine/threonine-protein kinase AFC3 GN=F4D11.140 OS=Arabidopsis thaliana (Mouse-ear cress) PE=2 SV=2	T	Signal transduction mechanisms	PREDICTED: serine/threonine-protein kinase PRP4 homolog isoform X1 [Setaria italica]	biological process: metabolic process (GO:0008152);; biological process: cellular process (GO:0009987);; molecular function: catalytic activity (GO:0003824);; molecular function: binding (GO:0005488);; cellular component: cell (GO:0005623);; cellular component: organelle (GO:0043226);; cellular component: cell part (GO:0044464)	--
BMK_Unigene_060402	CMGC_DYRK-PRP4	PK	0.253194	0	0	0	0.0812244	0.0788087	0.60326	-1.43306	normal	0.650012	-1.31798	normal	--	--	--	--	--	--	[RTKL]	--	Molecular Function: protein serine/threonine kinase activity (GO:0004674);; Molecular Function: ATP binding (GO:0005524);; Biological Process: protein phosphorylation (GO:0006468);;	K08827|2.17658e-18|sot:102597700|serine/threonine-protein kinase PRP4 homolog; K08827 serine/threonine-protein kinase PRP4 [EC:2.7.11.1] (A)	[A]	RNA processing and modification	Protein kinase domain;; Protein tyrosine kinase	Serine/threonine-protein kinase AFC1 GN=F4P12_270 OS=Arabidopsis thaliana (Mouse-ear cress) PE=2 SV=2	T	Signal transduction mechanisms	hypothetical protein SNOG_07950 [Phaeosphaeria nodorum SN15]	biological process: metabolic process (GO:0008152);; biological process: cellular process (GO:0009987);; molecular function: catalytic activity (GO:0003824);; molecular function: binding (GO:0005488)	--
BMK_Unigene_062194	CMGC_DYRK-PRP4	PK	0	0.22936	0	0	0	0.105973	0.60326	1.45297	normal	--	--	--	--	--	--	--	--	--	[RTKL]	--	Molecular Function: protein serine/threonine kinase activity (GO:0004674);; Molecular Function: ATP binding (GO:0005524);; Biological Process: protein phosphorylation (GO:0006468);;	K08827|9.57008e-27|ppp:PHYPADRAFT_144337|hypothetical protein; K08827 serine/threonine-protein kinase PRP4 [EC:2.7.11.1] (A)	[A]	RNA processing and modification	Protein kinase domain	Serine/threonine-protein kinase AFC3 GN=F4D11.140 OS=Arabidopsis thaliana (Mouse-ear cress) PE=2 SV=2	T	Signal transduction mechanisms	serine threonine-protein kinase prp4 [Colletotrichum orbiculare MAFF 240422]	biological process: metabolic process (GO:0008152);; biological process: cellular process (GO:0009987);; molecular function: catalytic activity (GO:0003824);; molecular function: binding (GO:0005488)	--
BMK_Unigene_089891	CMGC_DYRK-PRP4	PK	9.52879	2.2719	2.0924	6.58401	3.74057	2.33067	0.613943	-1.29635	normal	0.65547	-1.18975	normal	0.742172	-1.45861	normal	0.71421	-0.879081	normal	[RTKL]	--	Molecular Function: protein serine/threonine kinase activity (GO:0004674);; Molecular Function: ATP binding (GO:0005524);; Cellular Component: cytoplasm (GO:0005737);; Biological Process: protein phosphorylation (GO:0006468);;	--	[R]	General function prediction only	Protein kinase domain;; Protein tyrosine kinase	Serine/threonine-protein kinase AFC3 GN=F4D11.140 OS=Arabidopsis thaliana (Mouse-ear cress) PE=2 SV=2	--	--	PREDICTED: protein kinase C-like 1-like [Setaria italica]	biological process: metabolic process (GO:0008152);; biological process: cellular process (GO:0009987);; molecular function: catalytic activity (GO:0003824);; molecular function: binding (GO:0005488);; cellular component: cell (GO:0005623);; cellular component: cell part (GO:0044464)	--
BMK_Unigene_091997	CMGC_DYRK-PRP4	PK	17.8487	17.8237	17.625	28.4164	25.0967	25.3557	0.853725	0.218978	normal	0.866679	0.218609	normal	0.751897	0.367134	normal	0.875264	0.167812	normal	[RTKL]	--	Molecular Function: protein serine/threonine kinase activity (GO:0004674);; Molecular Function: ATP binding (GO:0005524);; Cellular Component: nucleus (GO:0005634);; Biological Process: protein phosphorylation (GO:0006468);; Cellular Component: plastid (GO:0009536);;	K08827|0|sita:101762555|serine/threonine-protein kinase PRP4 homolog; K08827 serine/threonine-protein kinase PRP4 [EC:2.7.11.1] (A)	[A]	RNA processing and modification	Protein kinase domain;; Protein tyrosine kinase	Serine/threonine-protein kinase AFC3 GN=F4D11.140 OS=Arabidopsis thaliana (Mouse-ear cress) PE=2 SV=2	T	Signal transduction mechanisms	PREDICTED: serine/threonine-protein kinase PRP4 homolog isoform X1 [Setaria italica]	biological process: metabolic process (GO:0008152);; biological process: cellular process (GO:0009987);; molecular function: catalytic activity (GO:0003824);; molecular function: binding (GO:0005488);; cellular component: cell (GO:0005623);; cellular component: organelle (GO:0043226);; cellular component: cell part (GO:0044464)	--
BMK_Unigene_096832	CMGC_DYRK-PRP4	PK	0	0	0	0	0.923294	0	--	--	--	--	--	--	0.751897	1.14276	normal	--	--	--	[RTKL]	--	Molecular Function: protein serine/threonine kinase activity (GO:0004674);; Molecular Function: ATP binding (GO:0005524);; Biological Process: protein phosphorylation (GO:0006468);;	K08827|4.69832e-27|bpg:Bathy15g01780|serine/threonine-protein kinase prp4; K08827 serine/threonine-protein kinase PRP4 [EC:2.7.11.1] (A)	[A]	RNA processing and modification	Protein kinase domain;; Protein tyrosine kinase	Phosphoenolpyruvate carboxylase kinase 2 GN=PPCK2 OS=Arabidopsis thaliana (Mouse-ear cress) PE=1 SV=2	T	Signal transduction mechanisms	serine/threonineeeee-protein kinase [Sporothrix brasiliensis 5110]	biological process: metabolic process (GO:0008152);; biological process: cellular process (GO:0009987);; molecular function: catalytic activity (GO:0003824);; molecular function: binding (GO:0005488)	--
BMK_Unigene_016574	CMGC_DYRK-YAK	PK	25.3984	21.138	26.342	27.3502	22.694	27.6111	0.83801	0.112287	normal	0.334958	0.580044	normal	0.995476	0.00410747	normal	0.380697	0.386489	normal	[RTKL]	--	Molecular Function: protein serine/threonine kinase activity (GO:0004674);; Molecular Function: ATP binding (GO:0005524);; Cellular Component: cytosol (GO:0005829);; Biological Process: protein phosphorylation (GO:0006468);; Cellular Component: plastid (GO:0009536);; Biological Process: response to abscisic acid (GO:0009737);;	K18670|0|sita:101780979|uncharacterized LOC101780979; K18670 dual specificity protein kinase YAK1 [EC:2.7.12.1] (A)	[R]	General function prediction only	Protein kinase domain;; Protein tyrosine kinase	Serine/threonine-protein kinase AFC1 GN=F4P12_270 OS=Arabidopsis thaliana (Mouse-ear cress) PE=2 SV=2	--	--	PREDICTED: uncharacterized protein LOC101780979 [Setaria italica]	biological process: metabolic process (GO:0008152);; biological process: cellular process (GO:0009987);; molecular function: catalytic activity (GO:0003824);; molecular function: binding (GO:0005488);; cellular component: cell (GO:0005623);; cellular component: cell part (GO:0044464);; cellular component: organelle (GO:0043226);; biological process: response to stimulus (GO:0050896)	--
BMK_Unigene_027953	CMGC_DYRK-YAK	PK	0	0	0	0	0	0.0793107	--	--	--	--	--	--	--	--	--	--	--	--	[RTKL]	--	Molecular Function: protein serine/threonine kinase activity (GO:0004674);; Molecular Function: ATP binding (GO:0005524);; Biological Process: protein phosphorylation (GO:0006468);;	K18670|1.70403e-38|mis:MICPUN_83368|hypothetical protein; K18670 dual specificity protein kinase YAK1 [EC:2.7.12.1] (A)	[R]	General function prediction only	Protein kinase domain;; Protein tyrosine kinase	Serine/threonine-protein kinase AFC2 GN=AFC2 OS=Arabidopsis thaliana (Mouse-ear cress) PE=1 SV=1	T	Signal transduction mechanisms	putative protein kinase protein [Neofusicoccum parvum UCRNP2]	biological process: metabolic process (GO:0008152);; biological process: cellular process (GO:0009987);; molecular function: catalytic activity (GO:0003824);; molecular function: binding (GO:0005488)	--
BMK_Unigene_007227	CMGC_GSK	PK	37.0561	63.5111	45.3697	77.7284	63.9555	59.0307	0.00524086	1.14695	up	0.0955918	0.810461	normal	0.987796	-0.024146	normal	0.972123	-0.0387337	normal	[RTKL]	--	Molecular Function: protein serine/threonine kinase activity (GO:0004674);; Molecular Function: ATP binding (GO:0005524);; Cellular Component: cytosol (GO:0005829);; Cellular Component: plasma membrane (GO:0005886);; Biological Process: protein phosphorylation (GO:0006468);; Biological Process: detection of brassinosteroid stimulus (GO:0009729);; Biological Process: response to auxin (GO:0009733)…	K14502|0|sita:101756248|shaggy-related protein kinase iota-like; K14502 protein brassinosteroid insensitive 2 [EC:2.7.11.1] (A)	[G]	Carbohydrate transport and metabolism	Protein kinase domain;; Protein tyrosine kinase	Shaggy-related protein kinase iota OS=Arabidopsis thaliana (Mouse-ear cress) PE=2 SV=1	T	Signal transduction mechanisms	PREDICTED: shaggy-related protein kinase iota-like [Setaria italica]	biological process: metabolic process (GO:0008152);; biological process: cellular process (GO:0009987);; molecular function: catalytic activity (GO:0003824);; molecular function: binding (GO:0005488);; cellular component: cell (GO:0005623);; cellular component: cell part (GO:0044464);; cellular component: membrane (GO:0016020);; biological process: response to stimulus (GO:0050896);; biological p…	Plant hormone signal transduction (ko04075)
BMK_Unigene_007899	CMGC_GSK	PK	0.774497	0	0	0.961795	0.764105	1.51101	0.00482413	-5.16979	down	0.0087976	-4.92187	down	0.989392	-0.0445702	normal	0.514773	0.936017	normal	[RTKL]	--	Molecular Function: protein serine/threonine kinase activity (GO:0004674);; Molecular Function: ATP binding (GO:0005524);; Biological Process: protein phosphorylation (GO:0006468);;	K03083|1.70673e-154|ppp:PHYPADRAFT_211896|hypothetical protein; K03083 glycogen synthase kinase 3 beta [EC:2.7.11.26] (A)	[G]	Carbohydrate transport and metabolism	Protein kinase domain;; Protein tyrosine kinase;; Kinase-like	Shaggy-related protein kinase gamma GN=ASK3 OS=Arabidopsis thaliana (Mouse-ear cress) PE=2 SV=1	--	--	similar to glycogen synthase kinase-3 beta [Leptosphaeria maculans JN3]	biological process: metabolic process (GO:0008152);; biological process: cellular process (GO:0009987);; molecular function: catalytic activity (GO:0003824);; molecular function: binding (GO:0005488)	--
BMK_Unigene_014267	CMGC_GSK	PK	118.715	123.361	139.363	159.817	144.427	163.051	0.748438	0.176405	normal	0.0456852	0.879689	normal	0.94449	-0.0911377	normal	0.597525	0.320178	normal	[RTKL]	--	Molecular Function: protein serine/threonine kinase activity (GO:0004674);; Molecular Function: ATP binding (GO:0005524);; Cellular Component: cytosol (GO:0005829);; Cellular Component: plasma membrane (GO:0005886);; Biological Process: protein phosphorylation (GO:0006468);; Biological Process: detection of brassinosteroid stimulus (GO:0009729);; Biological Process: response to auxin (GO:0009733)…	K14502|0|sita:101759495|shaggy-related protein kinase eta-like; K14502 protein brassinosteroid insensitive 2 [EC:2.7.11.1] (A)	[G]	Carbohydrate transport and metabolism	Protein kinase domain;; Protein tyrosine kinase	Shaggy-related protein kinase eta GN=F28A21.120 OS=Arabidopsis thaliana (Mouse-ear cress) PE=1 SV=2	T	Signal transduction mechanisms	PREDICTED: shaggy-related protein kinase eta-like [Setaria italica]	biological process: metabolic process (GO:0008152);; biological process: cellular process (GO:0009987);; molecular function: catalytic activity (GO:0003824);; molecular function: binding (GO:0005488);; cellular component: cell (GO:0005623);; cellular component: cell part (GO:0044464);; cellular component: membrane (GO:0016020);; biological process: response to stimulus (GO:0050896);; biological p…	Plant hormone signal transduction (ko04075)
BMK_Unigene_022128	CMGC_GSK	PK	0.174722	0	0.174873	0	0	0.269802	0.60326	-1.4456	normal	0.933157	0.3327	normal	--	--	--	0.452814	1.86208	normal	[RTKL]	--	Molecular Function: protein serine/threonine kinase activity (GO:0004674);; Molecular Function: ATP binding (GO:0005524);; Biological Process: protein phosphorylation (GO:0006468);; Molecular Function: tau-protein kinase activity (GO:0050321);;	K03083|4.66216e-27|gsl:Gasu_12710|cyclin-dependent serine/threonine protein kinase (EC:2.7.11.22); K03083 glycogen synthase kinase 3 beta [EC:2.7.11.26] (A)	[G]	Carbohydrate transport and metabolism	Protein kinase domain;; Protein tyrosine kinase	Shaggy-related protein kinase NtK-1 GN=NTK-1 OS=Nicotiana tabacum (Common tobacco) PE=2 SV=1	T	Signal transduction mechanisms	shaggy-like kinase [Pyrocystis lunula]	biological process: metabolic process (GO:0008152);; biological process: cellular process (GO:0009987);; molecular function: catalytic activity (GO:0003824);; molecular function: binding (GO:0005488)	--
BMK_Unigene_028848	CMGC_GSK	PK	0.525993	0	0	0.252729	0.249746	0.322486	--	--	--	--	--	--	--	--	--	--	--	--	[RTKL]	--	Molecular Function: protein serine/threonine kinase activity (GO:0004674);; Molecular Function: ATP binding (GO:0005524);; Biological Process: protein phosphorylation (GO:0006468);;	K03083|2.49112e-112|gsl:Gasu_12710|cyclin-dependent serine/threonine protein kinase (EC:2.7.11.22); K03083 glycogen synthase kinase 3 beta [EC:2.7.11.26] (A)	[G]	Carbohydrate transport and metabolism	Protein kinase domain;; Protein tyrosine kinase;; Kinase-like	Shaggy-related protein kinase NtK-1 GN=NTK-1 OS=Nicotiana tabacum (Common tobacco) PE=2 SV=1	G	Carbohydrate transport and metabolism	hypothetical protein SNOG_09203 [Phaeosphaeria nodorum SN15]	biological process: metabolic process (GO:0008152);; biological process: cellular process (GO:0009987);; molecular function: catalytic activity (GO:0003824);; molecular function: binding (GO:0005488)	--
BMK_Unigene_034144	CMGC_GSK	PK	13.0249	6.76522	6.54792	12.4167	9.01542	6.89934	0.426255	-0.560974	normal	0.628298	-0.471245	normal	0.859334	-0.18709	normal	0.466373	-0.462708	normal	[RTKL]	--	Molecular Function: protein serine/threonine kinase activity (GO:0004674);; Molecular Function: ATP binding (GO:0005524);; Cellular Component: cytosol (GO:0005829);; Cellular Component: plasma membrane (GO:0005886);; Biological Process: protein phosphorylation (GO:0006468);; Biological Process: detection of brassinosteroid stimulus (GO:0009729);; Biological Process: response to auxin (GO:0009733)…	K14502|4.25282e-48|sita:101783517|shaggy-related protein kinase zeta-like; K14502 protein brassinosteroid insensitive 2 [EC:2.7.11.1] (A)	[G]	Carbohydrate transport and metabolism	Protein kinase domain	Shaggy-related protein kinase eta GN=F28A21.120 OS=Arabidopsis thaliana (Mouse-ear cress) PE=1 SV=2	T	Signal transduction mechanisms	putative glycogen synthase kinase family protein [Zea mays]	biological process: metabolic process (GO:0008152);; biological process: cellular process (GO:0009987);; molecular function: catalytic activity (GO:0003824);; molecular function: binding (GO:0005488);; cellular component: cell (GO:0005623);; cellular component: cell part (GO:0044464);; cellular component: membrane (GO:0016020);; biological process: response to stimulus (GO:0050896);; biological p…	Plant hormone signal transduction (ko04075)
BMK_Unigene_042160	CMGC_GSK	PK	36.8401	31.3243	24.6977	50.3983	39.3527	32.36	0.613943	0.500367	normal	0.650012	0.491685	normal	0.94022	0.126081	normal	0.925407	-0.116614	normal	[RTKL]	--	Molecular Function: protein serine/threonine kinase activity (GO:0004674);; Molecular Function: protein tyrosine kinase activity (GO:0004713);; Molecular Function: ATP binding (GO:0005524);; Cellular Component: cytosol (GO:0005829);; Biological Process: protein phosphorylation (GO:0006468);; Biological Process: meristem structural organization (GO:0009933);;	K03083|0|sita:101774075|shaggy-related protein kinase alpha-like; K03083 glycogen synthase kinase 3 beta [EC:2.7.11.26] (A)	[G]	Carbohydrate transport and metabolism	Protein kinase domain;; Protein tyrosine kinase;; Choline/ethanolamine kinase	Shaggy-related protein kinase alpha GN=ASK1 OS=Arabidopsis thaliana (Mouse-ear cress) PE=1 SV=3	T	Signal transduction mechanisms	PREDICTED: shaggy-related protein kinase alpha-like isoform X1 [Setaria italica]	biological process: metabolic process (GO:0008152);; biological process: cellular process (GO:0009987);; molecular function: catalytic activity (GO:0003824);; biological process: single-organism process (GO:0044699);; molecular function: binding (GO:0005488);; cellular component: cell (GO:0005623);; cellular component: cell part (GO:0044464);; biological process: multicellular organismal process …	--
BMK_Unigene_043575	CMGC_GSK	PK	23.1479	8.44809	9.78745	19.1455	12.1148	13.1531	0.153522	-1.21848	normal	0.298512	-1.13032	normal	0.986009	0.0431702	normal	0.755015	-0.382923	normal	[RTKL]	--	Molecular Function: protein serine/threonine kinase activity (GO:0004674);; Molecular Function: ATP binding (GO:0005524);; Cellular Component: cytosol (GO:0005829);; Cellular Component: plasma membrane (GO:0005886);; Biological Process: protein phosphorylation (GO:0006468);; Biological Process: hyperosmotic response (GO:0006972);; Biological Process: response to salt stress (GO:0009651);;	K03083|0|sita:101775242|shaggy-related protein kinase delta-like; K03083 glycogen synthase kinase 3 beta [EC:2.7.11.26] (A)	[G]	Carbohydrate transport and metabolism	Protein kinase domain;; Protein tyrosine kinase	Shaggy-related protein kinase delta GN=ASK4 OS=Arabidopsis thaliana (Mouse-ear cress) PE=2 SV=1	T	Signal transduction mechanisms	PREDICTED: shaggy-related protein kinase delta-like isoform X1 [Setaria italica]	biological process: metabolic process (GO:0008152);; biological process: cellular process (GO:0009987);; molecular function: catalytic activity (GO:0003824);; molecular function: binding (GO:0005488);; cellular component: cell (GO:0005623);; cellular component: cell part (GO:0044464);; cellular component: membrane (GO:0016020);; biological process: response to stimulus (GO:0050896)	--
BMK_Unigene_043891	CMGC_GSK	PK	0.19438	3.90575	0.0828342	0	0.131204	0.0318755	1.35281e-05	4.37292	up	0.885679	-0.460359	normal	0.66122	1.64901	normal	0.699326	0.884471	normal	[RTKL]	--	Molecular Function: protein serine/threonine kinase activity (GO:0004674);; Molecular Function: ATP binding (GO:0005524);; Biological Process: protein phosphorylation (GO:0006468);;	K03083|1.41451e-153|ppp:PHYPADRAFT_211896|hypothetical protein; K03083 glycogen synthase kinase 3 beta [EC:2.7.11.26] (A)	[G]	Carbohydrate transport and metabolism	Protein kinase domain;; Protein tyrosine kinase	Shaggy-related protein kinase theta GN=ASK8 OS=Arabidopsis thaliana (Mouse-ear cress) PE=2 SV=3	T	Signal transduction mechanisms	glycogen synthase kinase [Rhizoctonia solani AG-3 Rhs1AP]	biological process: metabolic process (GO:0008152);; biological process: cellular process (GO:0009987);; molecular function: catalytic activity (GO:0003824);; molecular function: binding (GO:0005488)	--
BMK_Unigene_044811	CMGC_GSK	PK	59.037	75.3244	49.0739	59.273	73.9656	39.2022	0.157727	0.657922	normal	0.65547	0.293702	normal	0.720141	0.542322	normal	0.646663	-0.403213	normal	[RTKL]	--	Molecular Function: protein serine/threonine kinase activity (GO:0004674);; Molecular Function: ATP binding (GO:0005524);; Cellular Component: cytosol (GO:0005829);; Biological Process: protein phosphorylation (GO:0006468);; Biological Process: meristem structural organization (GO:0009933);;	K03083|0|sita:101774078|shaggy-related protein kinase alpha-like; K03083 glycogen synthase kinase 3 beta [EC:2.7.11.26] (A)	[G]	Carbohydrate transport and metabolism	Protein kinase domain;; Protein tyrosine kinase;; Kinase-like;; Choline/ethanolamine kinase	Glycogen synthase kinase-3 homolog MsK-3 GN=MSK-3 OS=Medicago sativa (Alfalfa) PE=2 SV=2	T	Signal transduction mechanisms	PREDICTED: shaggy-related protein kinase alpha-like [Setaria italica]	biological process: metabolic process (GO:0008152);; biological process: cellular process (GO:0009987);; molecular function: catalytic activity (GO:0003824);; molecular function: binding (GO:0005488);; cellular component: cell (GO:0005623);; cellular component: cell part (GO:0044464);; biological process: multicellular organismal process (GO:0032501);; biological process: developmental process (G…	--
BMK_Unigene_046363	CMGC_GSK	PK	127.264	137.585	143.385	150.704	143.801	159.928	0.360163	0.504568	normal	0.368078	0.543584	normal	0.842435	0.17956	normal	0.127107	0.672721	normal	[RTKL]	--	Molecular Function: protein serine/threonine kinase activity (GO:0004674);; Molecular Function: ATP binding (GO:0005524);; Cellular Component: cytosol (GO:0005829);; Cellular Component: plasma membrane (GO:0005886);; Biological Process: protein phosphorylation (GO:0006468);; Biological Process: detection of brassinosteroid stimulus (GO:0009729);; Biological Process: response to auxin (GO:0009733)…	K14502|0|sita:101759495|shaggy-related protein kinase eta-like; K14502 protein brassinosteroid insensitive 2 [EC:2.7.11.1] (A)	[G]	Carbohydrate transport and metabolism	Protein kinase domain;; Protein tyrosine kinase	Shaggy-related protein kinase eta GN=F28A21.120 OS=Arabidopsis thaliana (Mouse-ear cress) PE=1 SV=2	T	Signal transduction mechanisms	PREDICTED: shaggy-related protein kinase eta-like [Setaria italica]	biological process: metabolic process (GO:0008152);; biological process: cellular process (GO:0009987);; molecular function: catalytic activity (GO:0003824);; molecular function: binding (GO:0005488);; cellular component: cell (GO:0005623);; cellular component: cell part (GO:0044464);; cellular component: membrane (GO:0016020);; biological process: response to stimulus (GO:0050896);; biological p…	Plant hormone signal transduction (ko04075)
[truncated: 1,367 more rows]
